# Supplementary material for: Next-Generation Grade and Survival Expression Biomarkers of Human Gliomas Based on Algorithmically Reconstructed Molecular Pathways
Source: Int J Mol Sci. 2022 Jun 30;23(13):7330. doi: 10.3390/ijms23137330 (PMC9266372; doi:10.3390/ijms23137330)
Supplement: Supplementary file 1 [file ijms-23-07330-s001.zip]

Archive with 14 entries (14 files):
- ijms-1784843-supplementary.pdf
- Supplementary Figure S1.tif
- Supplementary Figure S2.png
- Supplementary Figure S3.png
- Supplementary Figure S4.png
- Supplementary Figure S5.png
- Supplementary Figure S6.png
- Supplementary Figure S7.png
- Supplementary Figure S8.png
- Supplementary table S1.xlsx
- Supplementary table S2.xlsx
- Supplementary table S3.xlsx
- Supplementary table S4.xlsx
- Supplementary table S5,handly_direction_names.xlsx
