# Supplementary material for: Next-Generation Grade and Survival Expression Biomarkers of Human Gliomas Based on Algorithmically Reconstructed Molecular Pathways
Source: Int J Mol Sci. 2022 Jun 30;23(13):7330. doi: 10.3390/ijms23137330 (PMC9266372; doi:10.3390/ijms23137330)
Supplement: Supplementary file 1 [file ijms-23-07330-s001.zip › Supplementary table S1.xlsx]

## Sheet: all_m
AAED1

## Sheet: all_p
AAMP

## Sheet: MGMT meth_m
ABCC3

## Sheet: MGMT meth_p
ABCC8

## Sheet: MGMT unmeth_m
ADPRH

## Sheet: MGMT unmeth_p
ABHD14A

## Sheet: IDH mut_m
AAED1

## Sheet: IDH mut_p
BRINP1
