# Supplementary material for: Next-Generation Grade and Survival Expression Biomarkers of Human Gliomas Based on Algorithmically Reconstructed Molecular Pathways
Source: Int J Mol Sci. 2022 Jun 30;23(13):7330. doi: 10.3390/ijms23137330 (PMC9266372; doi:10.3390/ijms23137330)
Supplement: Supplementary file 1 [file ijms-23-07330-s001.zip › Supplementary table S3.xlsx]

## Sheet: all_m
centr_pathway_A2M
centr_pathway_AAAS
centr_pathway_AATF
centr_pathway_AATK
centr_pathway_ABCB1
centr_pathway_ABCC10
centr_pathway_ABCC2
centr_pathway_ABI1
centr_pathway_ABL1
centr_pathway_ABR
centr_pathway_ACADVL
centr_pathway_ACAN
centr_pathway_ACD
centr_pathway_ACKR3
centr_pathway_ACP1
centr_pathway_ACTA1
centr_pathway_ACTA2
centr_pathway_ACTB
centr_pathway_ACTG1
centr_pathway_ACTG2
centr_pathway_ACTN1
centr_pathway_ACTN3
centr_pathway_ACTN4
centr_pathway_ACTR1A
centr_pathway_ACTR2
centr_pathway_ACTR3
centr_pathway_ADAM12
centr_pathway_ADAM15
centr_pathway_ADAMTS15
centr_pathway_ADAMTS18
centr_pathway_ADAMTS7
centr_pathway_ADAMTSL4
centr_pathway_ADM
centr_pathway_ADM2
centr_pathway_ADORA2B
centr_pathway_ADPGK
centr_pathway_ADRB3
centr_pathway_AES
centr_pathway_AGA
centr_pathway_AGER
centr_pathway_AGL
centr_pathway_AGRN
centr_pathway_AGTR1
centr_pathway_AHCTF1
centr_pathway_AIFM1
centr_pathway_AJUBA
centr_pathway_AKAP13
centr_pathway_AKT2
centr_pathway_ALG13
centr_pathway_ALG14
centr_pathway_ALG6
centr_pathway_ALK
centr_pathway_ALMS1
centr_pathway_ALOX15B
centr_pathway_ALPL
centr_pathway_ALPP
centr_pathway_ALPPL2
centr_pathway_AMD1
centr_pathway_AMY1A
centr_pathway_AMY1B
centr_pathway_AMY1C
centr_pathway_AMY2A
centr_pathway_AMY2B
centr_pathway_ANAPC1
centr_pathway_ANAPC10
centr_pathway_ANAPC11
centr_pathway_ANAPC2
centr_pathway_ANAPC4
centr_pathway_ANAPC5
centr_pathway_ANAPC7
centr_pathway_ANGPT2
centr_pathway_ANGPT4
centr_pathway_ANGPTL1
centr_pathway_ANGPTL6
centr_pathway_ANP32A
centr_pathway_ANTXR1
centr_pathway_ANTXR2
centr_pathway_ANXA1
centr_pathway_ANXA2
centr_pathway_AP1B1
centr_pathway_AP1G1
centr_pathway_AP1M1
centr_pathway_AP1M2
centr_pathway_AP1S1
centr_pathway_AP1S2
centr_pathway_AP1S3
centr_pathway_APAF1
centr_pathway_APBB1IP
centr_pathway_APCS
centr_pathway_APH1A
centr_pathway_APH1B
centr_pathway_APLN
centr_pathway_APLNR
centr_pathway_APOA1
centr_pathway_APOA2
centr_pathway_APOB
centr_pathway_APOE
centr_pathway_APP
centr_pathway_ARAP1
centr_pathway_ARAP2
centr_pathway_ARAP3
centr_pathway_ARC
centr_pathway_AREG
centr_pathway_ARF1
centr_pathway_ARHGAP10
centr_pathway_ARHGAP11A
centr_pathway_ARHGAP11B
centr_pathway_ARHGAP12
centr_pathway_ARHGAP15
centr_pathway_ARHGAP17
centr_pathway_ARHGAP18
centr_pathway_ARHGAP19
centr_pathway_ARHGAP20
centr_pathway_ARHGAP22
centr_pathway_ARHGAP23
centr_pathway_ARHGAP24
centr_pathway_ARHGAP25
centr_pathway_ARHGAP26
centr_pathway_ARHGAP29
centr_pathway_ARHGAP30
centr_pathway_ARHGAP31
centr_pathway_ARHGAP32
centr_pathway_ARHGAP33
centr_pathway_ARHGAP35
centr_pathway_ARHGAP36
centr_pathway_ARHGAP39
centr_pathway_ARHGAP4
centr_pathway_ARHGAP44
centr_pathway_ARHGAP5
centr_pathway_ARHGAP6
centr_pathway_ARHGAP8
centr_pathway_ARHGAP9
centr_pathway_ARHGDIB
centr_pathway_ARHGDIG
centr_pathway_ARHGEF1
centr_pathway_ARHGEF11
centr_pathway_ARHGEF12
centr_pathway_ARHGEF16
centr_pathway_ARHGEF17
centr_pathway_ARHGEF2
centr_pathway_ARHGEF28
centr_pathway_ARHGEF3
centr_pathway_ARHGEF6
centr_pathway_ARHGEF7
centr_pathway_ARID4B
centr_pathway_ARIH1
centr_pathway_ARPC1A
centr_pathway_ARPC2
centr_pathway_ARPC3
centr_pathway_ARPC4
centr_pathway_ARPC5
centr_pathway_ARSK
centr_pathway_ASAP1
centr_pathway_ASAP2
centr_pathway_ASAP3
centr_pathway_ASH2L
centr_pathway_ASPH
centr_pathway_ATM
centr_pathway_ATP2A3
centr_pathway_ATR
centr_pathway_ATRIP
centr_pathway_AURKA
centr_pathway_AURKB
centr_pathway_AURKC
centr_pathway_AVPR2
centr_pathway_AXIN1
centr_pathway_AXL
centr_pathway_B2M
centr_pathway_B3GALNT1
centr_pathway_B3GALT1
centr_pathway_B3GALT5
centr_pathway_B3GALT6
centr_pathway_B9D2
centr_pathway_BACH1
centr_pathway_BANF1
centr_pathway_BARD1
centr_pathway_BATF3
centr_pathway_BAX
centr_pathway_BAZ2A
centr_pathway_BCAR1
centr_pathway_BCAR3
centr_pathway_BCAT1
centr_pathway_BCAT2
centr_pathway_BCKDHB
centr_pathway_BCL9
centr_pathway_BCL9L
centr_pathway_BCR
centr_pathway_BDKRB1
centr_pathway_BDKRB2
centr_pathway_BDNF
centr_pathway_BET1
centr_pathway_BGN
centr_pathway_BID
centr_pathway_BIRC2
centr_pathway_BIRC3
centr_pathway_BIRC5
centr_pathway_BIRC8
centr_pathway_BLK
centr_pathway_BLM
centr_pathway_BLNK
centr_pathway_BMI1
centr_pathway_BMP1
centr_pathway_BMP10
centr_pathway_BMP15
centr_pathway_BMP2
centr_pathway_BMP3
centr_pathway_BMP4
centr_pathway_BMP5
centr_pathway_BMP6
centr_pathway_BMP7
centr_pathway_BMP8A
centr_pathway_BMP8B
centr_pathway_BNIP1
centr_pathway_BORA
centr_pathway_BRCA1
centr_pathway_BRCA2
centr_pathway_BRD8
centr_pathway_BRPF1
centr_pathway_BST1
centr_pathway_BTC
centr_pathway_BTK
centr_pathway_BTLA
centr_pathway_BUB1
centr_pathway_BUB1B
centr_pathway_BUB3
centr_pathway_C1QA
centr_pathway_C1QB
centr_pathway_C1QC
centr_pathway_C1R
centr_pathway_C1S
centr_pathway_C2
centr_pathway_C3
centr_pathway_C3AR1
centr_pathway_C4B
centr_pathway_C4BPB
centr_pathway_C5
centr_pathway_C5AR1
centr_pathway_CAD
centr_pathway_CALCB
centr_pathway_CALCR
centr_pathway_CALD1
centr_pathway_CANX
centr_pathway_CARD11
centr_pathway_CARD16
centr_pathway_CARD8
centr_pathway_CASP1
centr_pathway_CASP10
centr_pathway_CASP12
centr_pathway_CASP2
centr_pathway_CASP3
centr_pathway_CASP4
centr_pathway_CASP6
centr_pathway_CASP7
centr_pathway_CASP8
centr_pathway_CASP9
centr_pathway_CASR
centr_pathway_CAT
centr_pathway_CAV1
centr_pathway_CBFB
centr_pathway_CBL
centr_pathway_CBLB
centr_pathway_CBX2
centr_pathway_CBX4
centr_pathway_CBX6
centr_pathway_CBX8
centr_pathway_CCL1
centr_pathway_CCL11
centr_pathway_CCL13
centr_pathway_CCL14
centr_pathway_CCL15
centr_pathway_CCL16
centr_pathway_CCL17
centr_pathway_CCL18
centr_pathway_CCL19
centr_pathway_CCL2
centr_pathway_CCL20
centr_pathway_CCL21
centr_pathway_CCL22
centr_pathway_CCL23
centr_pathway_CCL24
centr_pathway_CCL25
centr_pathway_CCL26
centr_pathway_CCL27
centr_pathway_CCL28
centr_pathway_CCL3
centr_pathway_CCL3L1
centr_pathway_CCL4
centr_pathway_CCL4L1
centr_pathway_CCL4L2
centr_pathway_CCL5
centr_pathway_CCL7
centr_pathway_CCL8
centr_pathway_CCNA1
centr_pathway_CCNA2
centr_pathway_CCNB1
centr_pathway_CCND1
centr_pathway_CCND2
centr_pathway_CCND3
centr_pathway_CCP110
centr_pathway_CCR5
centr_pathway_CCRL2
centr_pathway_CCT2
centr_pathway_CCT3
centr_pathway_CCT4
centr_pathway_CCT5
centr_pathway_CCT6A
centr_pathway_CCT7
centr_pathway_CCT8
centr_pathway_CD14
centr_pathway_CD19
centr_pathway_CD2
centr_pathway_CD209
centr_pathway_CD226
centr_pathway_CD27
centr_pathway_CD274
centr_pathway_CD28
centr_pathway_CD300E
centr_pathway_CD36
centr_pathway_CD3D
centr_pathway_CD40
centr_pathway_CD40LG
centr_pathway_CD44
centr_pathway_CD48
centr_pathway_CD70
centr_pathway_CD72
centr_pathway_CD74
centr_pathway_CD79A
centr_pathway_CD79B
centr_pathway_CD80
centr_pathway_CD81
centr_pathway_CD86
centr_pathway_CD8A
centr_pathway_CD8B
centr_pathway_CD9
centr_pathway_CDC16
centr_pathway_CDC20
centr_pathway_CDC23
centr_pathway_CDC25A
centr_pathway_CDC25B
centr_pathway_CDC25C
centr_pathway_CDC26
centr_pathway_CDC27
centr_pathway_CDC34
centr_pathway_CDC42
centr_pathway_CDC42BPA
centr_pathway_CDC45
centr_pathway_CDC6
centr_pathway_CDC7
centr_pathway_CDCA5
centr_pathway_CDCA8
centr_pathway_CDH19
centr_pathway_CDH23
centr_pathway_CDH26
centr_pathway_CDK1
centr_pathway_CDK11A
centr_pathway_CDK11B
centr_pathway_CDK2
centr_pathway_CDK4
centr_pathway_CDK5RAP2
centr_pathway_CDK6
centr_pathway_CDK7
centr_pathway_CDKN1B
centr_pathway_CDKN1C
centr_pathway_CDKN2A
centr_pathway_CDKN2B
centr_pathway_CDT1
centr_pathway_CEBPB
centr_pathway_CENPA
centr_pathway_CENPC
centr_pathway_CENPE
centr_pathway_CENPF
centr_pathway_CENPH
centr_pathway_CENPI
centr_pathway_CENPJ
centr_pathway_CENPK
centr_pathway_CENPL
centr_pathway_CENPM
centr_pathway_CENPN
centr_pathway_CENPO
centr_pathway_CENPP
centr_pathway_CENPQ
centr_pathway_CENPT
centr_pathway_CENPU
centr_pathway_CEP131
centr_pathway_CEP135
centr_pathway_CEP152
centr_pathway_CEP164
centr_pathway_CEP250
centr_pathway_CEP290
centr_pathway_CEP41
centr_pathway_CEP57
centr_pathway_CEP63
centr_pathway_CEP70
centr_pathway_CEP72
centr_pathway_CEP76
centr_pathway_CEP78
centr_pathway_CER1
centr_pathway_CETN2
centr_pathway_CFLAR
centr_pathway_CGA
centr_pathway_CHAD
centr_pathway_CHAF1A
centr_pathway_CHEK1
centr_pathway_CHEK2
centr_pathway_CHN1
centr_pathway_CHN2
centr_pathway_CHRNA1
centr_pathway_CHUK
centr_pathway_CISH
centr_pathway_CKAP5
centr_pathway_CLASP1
centr_pathway_CLASP2
centr_pathway_CLCF1
centr_pathway_CLEC11A
centr_pathway_CLEC4M
centr_pathway_CLEC5A
centr_pathway_CLIC1
centr_pathway_CLINT1
centr_pathway_CLIP1
centr_pathway_CLSPN
centr_pathway_CLTA
centr_pathway_CLTB
centr_pathway_CLTC
centr_pathway_CMAS
centr_pathway_CMPK1
centr_pathway_CMPK2
centr_pathway_CNR2
centr_pathway_CNTF
centr_pathway_CNTRL
centr_pathway_COL10A1
centr_pathway_COL11A1
centr_pathway_COL11A2
centr_pathway_COL12A1
centr_pathway_COL13A1
centr_pathway_COL14A1
centr_pathway_COL15A1
centr_pathway_COL16A1
centr_pathway_COL17A1
centr_pathway_COL18A1
centr_pathway_COL19A1
centr_pathway_COL1A1
centr_pathway_COL1A2
centr_pathway_COL20A1
centr_pathway_COL21A1
centr_pathway_COL22A1
centr_pathway_COL23A1
centr_pathway_COL24A1
centr_pathway_COL25A1
centr_pathway_COL26A1
centr_pathway_COL27A1
centr_pathway_COL28A1
centr_pathway_COL2A1
centr_pathway_COL3A1
centr_pathway_COL4A1
centr_pathway_COL4A2
centr_pathway_COL4A3
centr_pathway_COL4A4
centr_pathway_COL4A5
centr_pathway_COL4A6
centr_pathway_COL5A1
centr_pathway_COL5A2
centr_pathway_COL5A3
centr_pathway_COL6A1
centr_pathway_COL6A2
centr_pathway_COL6A3
centr_pathway_COL6A5
centr_pathway_COL6A6
centr_pathway_COL7A1
centr_pathway_COL8A1
centr_pathway_COL8A2
centr_pathway_COL9A1
centr_pathway_COL9A2
centr_pathway_COL9A3
centr_pathway_COLGALT1
centr_pathway_COLGALT2
centr_pathway_COMP
centr_pathway_COPA
centr_pathway_COPRS
centr_pathway_COPS5
centr_pathway_CP
centr_pathway_CPEB1
centr_pathway_CPEB2
centr_pathway_CPEB3
centr_pathway_CPEB4
centr_pathway_CRADD
centr_pathway_CREBBP
centr_pathway_CRKL
centr_pathway_CROT
centr_pathway_CRP
centr_pathway_CRTAP
centr_pathway_CSF1
centr_pathway_CSF1R
centr_pathway_CSF2
centr_pathway_CSF2RB
centr_pathway_CSF3
centr_pathway_CSH1
centr_pathway_CSH2
centr_pathway_CSK
centr_pathway_CSNK1E
centr_pathway_CSPG4
centr_pathway_CTF1
centr_pathway_CTGF
centr_pathway_CTHRC1
centr_pathway_CTRC
centr_pathway_CTSA
centr_pathway_CTSB
centr_pathway_CTSC
centr_pathway_CTSE
centr_pathway_CTSF
centr_pathway_CTSG
centr_pathway_CTSH
centr_pathway_CTSK
centr_pathway_CTSL
centr_pathway_CTSO
centr_pathway_CTSV
centr_pathway_CTTN
centr_pathway_CUL3
centr_pathway_CX3CL1
centr_pathway_CXCL1
centr_pathway_CXCL10
centr_pathway_CXCL11
centr_pathway_CXCL13
centr_pathway_CXCL14
centr_pathway_CXCL16
centr_pathway_CXCL2
centr_pathway_CXCL3
centr_pathway_CXCL6
centr_pathway_CXCL9
centr_pathway_CXCR4
centr_pathway_CYBA
centr_pathway_CYBB
centr_pathway_CYP27B1
centr_pathway_CYP2D6
centr_pathway_CYR61
centr_pathway_CYTH4
centr_pathway_DAAM1
centr_pathway_DAG1
centr_pathway_DAP
centr_pathway_DAP3
centr_pathway_DAXX
centr_pathway_DBF4
centr_pathway_DBNL
centr_pathway_DCHS1
centr_pathway_DCTD
centr_pathway_DCTN2
centr_pathway_DCTN3
centr_pathway_DCTPP1
centr_pathway_DDR1
centr_pathway_DDR2
centr_pathway_DDX20
centr_pathway_DDX5
centr_pathway_DDX58
centr_pathway_DEFA1B
centr_pathway_DEFA3
centr_pathway_DEPDC1B
centr_pathway_DEPDC7
centr_pathway_DERA
centr_pathway_DFFB
centr_pathway_DHX36
centr_pathway_DIAPH3
centr_pathway_DICER1
centr_pathway_DIRAS3
centr_pathway_DIS3
centr_pathway_DLC1
centr_pathway_DLGAP5
centr_pathway_DLL1
centr_pathway_DMAP1
centr_pathway_DMC1
centr_pathway_DNA2
centr_pathway_DNAJA3
centr_pathway_DNM2
centr_pathway_DNM3
centr_pathway_DNMT1
centr_pathway_DNMT3A
centr_pathway_DNMT3B
centr_pathway_DOCK1
centr_pathway_DOCK11
centr_pathway_DOCK4
centr_pathway_DOCK7
centr_pathway_DPEP1
centr_pathway_DPEP2
centr_pathway_DPF2
centr_pathway_DPYD
centr_pathway_DSG2
centr_pathway_DSN1
centr_pathway_DTX3L
centr_pathway_DTYMK
centr_pathway_DUSP1
centr_pathway_DUSP14
centr_pathway_DUT
centr_pathway_DVL3
centr_pathway_DYNC1H1
centr_pathway_DYNC1I1
centr_pathway_DYNC1I2
centr_pathway_DYNC1LI2
centr_pathway_DYNC2H1
centr_pathway_DYNLL1
centr_pathway_E2F1
centr_pathway_E2F2
centr_pathway_E2F3
centr_pathway_E2F4
centr_pathway_E2F5
centr_pathway_EBI3
centr_pathway_ECM1
centr_pathway_ECM2
centr_pathway_ECT2
centr_pathway_EED
centr_pathway_EFEMP1
centr_pathway_EFEMP2
centr_pathway_EGFR
centr_pathway_EGLN1
centr_pathway_EGLN2
centr_pathway_EGLN3
centr_pathway_EGR1
centr_pathway_EGR4
centr_pathway_EHMT1
centr_pathway_EHMT2
centr_pathway_EIF2AK2
centr_pathway_EIF4E2
centr_pathway_EIF4E3
centr_pathway_EIF4EBP2
centr_pathway_EIF4G2
centr_pathway_EIF4G3
centr_pathway_EIF6
centr_pathway_ELANE
centr_pathway_ELAVL1
centr_pathway_ELF1
centr_pathway_ELK1
centr_pathway_ELMO1
centr_pathway_ELMO2
centr_pathway_ELN
centr_pathway_ELP2
centr_pathway_ELP4
centr_pathway_ELP5
centr_pathway_ELP6
centr_pathway_ELSPBP1
centr_pathway_EML4
centr_pathway_ENG
centr_pathway_ENPP1
centr_pathway_ENPP3
centr_pathway_EP300
centr_pathway_EPC1
centr_pathway_EPHA1
centr_pathway_EPHA2
centr_pathway_EPHA3
centr_pathway_EPHA4
centr_pathway_EPHA5
centr_pathway_EPHA7
centr_pathway_EPHA8
centr_pathway_EPHB1
centr_pathway_EPHB2
centr_pathway_EPHB3
centr_pathway_EPHB4
centr_pathway_EPHB6
centr_pathway_EPO
centr_pathway_EPOR
centr_pathway_EPS8
centr_pathway_EPYC
centr_pathway_ERBB2
centr_pathway_ERBB3
centr_pathway_ERBB4
centr_pathway_ERCC6L
centr_pathway_ERN1
centr_pathway_ESPL1
centr_pathway_EVI5
centr_pathway_EVL
centr_pathway_EXO1
centr_pathway_EXOSC1
centr_pathway_EXOSC2
centr_pathway_EXOSC3
centr_pathway_EXOSC4
centr_pathway_EXOSC5
centr_pathway_EXOSC6
centr_pathway_EXOSC7
centr_pathway_EXOSC8
centr_pathway_EXOSC9
centr_pathway_EXT1
centr_pathway_EXT2
centr_pathway_EZH2
centr_pathway_EZR
centr_pathway_F2RL1
centr_pathway_F2RL2
centr_pathway_F7
centr_pathway_F8
centr_pathway_FAM13A
centr_pathway_FAM13B
centr_pathway_FAN1
centr_pathway_FANCA
centr_pathway_FANCB
centr_pathway_FANCC
centr_pathway_FANCD2
centr_pathway_FANCE
centr_pathway_FANCF
centr_pathway_FANCG
centr_pathway_FANCI
centr_pathway_FANCL
centr_pathway_FANCM
centr_pathway_FARP2
centr_pathway_FASLG
centr_pathway_FBLIM1
centr_pathway_FBLN1
centr_pathway_FBLN2
centr_pathway_FBLN5
centr_pathway_FBN1
centr_pathway_FBN2
centr_pathway_FBN3
centr_pathway_FBXO43
centr_pathway_FBXO5
centr_pathway_FCER1A
centr_pathway_FCER1G
centr_pathway_FCGR1A
centr_pathway_FCGR2B
centr_pathway_FCGR3A
centr_pathway_FECH
centr_pathway_FER
centr_pathway_FERMT2
centr_pathway_FGA
centr_pathway_FGB
centr_pathway_FGD1
centr_pathway_FGD2
centr_pathway_FGD3
centr_pathway_FGD4
centr_pathway_FGF11
centr_pathway_FGF12
centr_pathway_FGF13
centr_pathway_FGF14
centr_pathway_FGF17
centr_pathway_FGF21
centr_pathway_FGF5
centr_pathway_FGF8
centr_pathway_FGFR1
centr_pathway_FGFR1OP
centr_pathway_FGFR3
centr_pathway_FGFR4
centr_pathway_FGG
centr_pathway_FKBP3
centr_pathway_fliC
centr_pathway_FLNA
centr_pathway_FLNB
centr_pathway_FLNC
centr_pathway_FLT1
centr_pathway_FLT3
centr_pathway_FLT4
centr_pathway_FMN1
centr_pathway_FN1
centr_pathway_FOS
centr_pathway_FOSL1
centr_pathway_FOXD3
centr_pathway_FOXM1
centr_pathway_FOXP3
centr_pathway_FPR2
centr_pathway_FPR3
centr_pathway_FRA16A
centr_pathway_FRAS1
centr_pathway_FREM1
centr_pathway_FREM2
centr_pathway_FRMD6
centr_pathway_FTH1
centr_pathway_FTL
centr_pathway_FUK
centr_pathway_FURIN
centr_pathway_FUT8
centr_pathway_FZR1
centr_pathway_GAB1
centr_pathway_GAB2
centr_pathway_GAL
centr_pathway_GALE
centr_pathway_GALNS
centr_pathway_GALR1
centr_pathway_GALR2
centr_pathway_GANAB
centr_pathway_GAS1
centr_pathway_GAS2
centr_pathway_GAS6
centr_pathway_GAS8
centr_pathway_GBE1
centr_pathway_GBGT1
centr_pathway_GCK
centr_pathway_GCKR
centr_pathway_GCLC
centr_pathway_GCLM
centr_pathway_GDF10
centr_pathway_GDF15
centr_pathway_GDF2
centr_pathway_GDF5
centr_pathway_GDF6
centr_pathway_GDF9
centr_pathway_GEMIN2
centr_pathway_GEMIN4
centr_pathway_GEMIN5
centr_pathway_GEMIN6
centr_pathway_GEMIN7
centr_pathway_GFER
centr_pathway_GGCT
centr_pathway_GGH
centr_pathway_GH1
centr_pathway_GH2
centr_pathway_GHRH
centr_pathway_GINS1
centr_pathway_GINS2
centr_pathway_GINS4
centr_pathway_GIP
centr_pathway_GJD2
centr_pathway_GLB1
centr_pathway_GLCE
centr_pathway_GMFG
centr_pathway_GMIP
centr_pathway_GNA12
centr_pathway_GNA13
centr_pathway_GNE
centr_pathway_GNRH1
centr_pathway_GNRH2
centr_pathway_GNRHR
centr_pathway_GOLGA2
centr_pathway_GORASP1
centr_pathway_GP1BA
centr_pathway_GP1BB
centr_pathway_GP5
centr_pathway_GP6
centr_pathway_GP9
centr_pathway_GPBAR1
centr_pathway_GPC1
centr_pathway_GPC4
centr_pathway_GPC5
centr_pathway_GPC6
centr_pathway_GPER1
centr_pathway_GPLD1
centr_pathway_GPR132
centr_pathway_GPR18
centr_pathway_GPR37
centr_pathway_GPR55
centr_pathway_GPR65
centr_pathway_GPS2
centr_pathway_GRAP2
centr_pathway_GSC
centr_pathway_GSK3A
centr_pathway_GSK3B
centr_pathway_GSN
centr_pathway_GTSE1
centr_pathway_GXYLT1
centr_pathway_GZMA
centr_pathway_GZMB
centr_pathway_GZMH
centr_pathway_H2AFB1
centr_pathway_H2AFX
centr_pathway_H2AFZ
centr_pathway_H3F3B
centr_pathway_HAND1
centr_pathway_HAND2
centr_pathway_HAPLN1
centr_pathway_HAPLN2
centr_pathway_HAPLN3
centr_pathway_HAPLN4
centr_pathway_HAT1
centr_pathway_HAUS2
centr_pathway_HCFC1
centr_pathway_HCLS1
centr_pathway_HCRTR1
centr_pathway_HDAC1
centr_pathway_HDAC10
centr_pathway_HDAC2
centr_pathway_HDAC3
centr_pathway_HDAC8
centr_pathway_HDGF
centr_pathway_HEBP1
centr_pathway_HERC5
centr_pathway_HES1
centr_pathway_HGF
centr_pathway_HGSNAT
centr_pathway_HIC1
centr_pathway_HIST1H2AA
centr_pathway_HIST1H2AB
centr_pathway_HIST1H2AC
centr_pathway_HIST1H2AD
centr_pathway_HIST1H2AG
centr_pathway_HIST1H2AH
centr_pathway_HIST1H2AJ
centr_pathway_HIST1H2BA
centr_pathway_HIST1H2BB
centr_pathway_HIST1H2BC
centr_pathway_HIST1H2BD
centr_pathway_HIST1H2BH
centr_pathway_HIST1H2BJ
centr_pathway_HIST1H2BK
centr_pathway_HIST1H2BL
centr_pathway_HIST1H2BM
centr_pathway_HIST1H2BN
centr_pathway_HIST1H2BO
centr_pathway_HIST1H3F
centr_pathway_HIST2H2AA3
centr_pathway_HIST2H2AC
centr_pathway_HIST2H2BE
centr_pathway_HIST2H3D
centr_pathway_HIST2H4A
centr_pathway_HIST3H2BB
centr_pathway_HIST3H3
centr_pathway_HJURP
centr_pathway_HK1
centr_pathway_HK2
centr_pathway_HK3
centr_pathway_HLA.A
centr_pathway_HLA.DPA1
centr_pathway_HLA.DPB1
centr_pathway_HLA.DQA1
centr_pathway_HLA.DQA2
centr_pathway_HLA.DQB1
centr_pathway_HLA.DQB2
centr_pathway_HLA.DRB3
centr_pathway_HLA.DRB4
centr_pathway_HLA.DRB5
centr_pathway_HLA.E
centr_pathway_HMGB1
centr_pathway_HMGB2
centr_pathway_HPSE
centr_pathway_HRG
centr_pathway_HRH1
centr_pathway_HRH4
centr_pathway_HS02988
centr_pathway_HS2ST1
centr_pathway_HS3ST1
centr_pathway_HS3ST2
centr_pathway_HS3ST3A1
centr_pathway_HS3ST3B1
centr_pathway_HS3ST4
centr_pathway_HS3ST5
centr_pathway_HS3ST6
centr_pathway_HS6ST1
centr_pathway_HS6ST2
centr_pathway_HS6ST3
centr_pathway_HSD3B7
centr_pathway_HSP90AA1
centr_pathway_HSPA1B
centr_pathway_HSPA1L
centr_pathway_HSPA5
centr_pathway_HSPD1
centr_pathway_HSPG2
centr_pathway_HTR2A
centr_pathway_HTR2B
centr_pathway_HTR4
centr_pathway_HUS1
centr_pathway_HYAL2
centr_pathway_HYKK
centr_pathway_IBSP
centr_pathway_IBTK
centr_pathway_ICAM3
centr_pathway_ICAM4
centr_pathway_ICMT
centr_pathway_ID1
centr_pathway_IFI16
centr_pathway_IFIT1
centr_pathway_IFNA1
centr_pathway_IFNA10
centr_pathway_IFNAR2
centr_pathway_IFNB1
centr_pathway_IFNE
centr_pathway_IFNK
centr_pathway_IFNL1
centr_pathway_IFNL2
centr_pathway_IFNL3
centr_pathway_IFNW1
centr_pathway_IGF1
centr_pathway_IGF1R
centr_pathway_IGF2.AS
centr_pathway_IGF2
centr_pathway_IGFBP2
centr_pathway_IGHE
centr_pathway_IGHG1
centr_pathway_IGHG3
centr_pathway_IGSF8
centr_pathway_IKBKAP
centr_pathway_IKBKB
centr_pathway_IKBKG
centr_pathway_IL10
centr_pathway_IL10RA
centr_pathway_IL10RB
centr_pathway_IL11
centr_pathway_IL12A
centr_pathway_IL12B
centr_pathway_IL12RB2
centr_pathway_IL13
centr_pathway_IL13RA2
centr_pathway_IL15
centr_pathway_IL16
centr_pathway_IL17A
centr_pathway_IL17B
centr_pathway_IL17C
centr_pathway_IL17D
centr_pathway_IL17RA
centr_pathway_IL18
centr_pathway_IL18R1
centr_pathway_IL18RAP
centr_pathway_IL19
centr_pathway_IL1A
centr_pathway_IL1B
centr_pathway_IL1R2
centr_pathway_IL1RAP
centr_pathway_IL1RN
centr_pathway_IL2
centr_pathway_IL20
centr_pathway_IL21
centr_pathway_IL22
centr_pathway_IL23A
centr_pathway_IL24
centr_pathway_IL27
centr_pathway_IL27RA
centr_pathway_IL2RA
centr_pathway_IL2RB
centr_pathway_IL2RG
centr_pathway_IL3
centr_pathway_IL3RA
centr_pathway_IL4
centr_pathway_IL4R
centr_pathway_IL5
centr_pathway_IL6
centr_pathway_IL6R
centr_pathway_IL6ST
centr_pathway_IL7
centr_pathway_IL7R
centr_pathway_IL9
centr_pathway_IL9R
centr_pathway_ILK
centr_pathway_IMPG1
centr_pathway_IMPG2
centr_pathway_INCENP
centr_pathway_ING3
centr_pathway_INHBB
centr_pathway_INHBE
centr_pathway_INPP5D
centr_pathway_INPPL1
centr_pathway_INSR
centr_pathway_INSRR
centr_pathway_IQGAP2
centr_pathway_IQGAP3
centr_pathway_IRAK1
centr_pathway_IRAK2
centr_pathway_IRAK3
centr_pathway_IRAK4
centr_pathway_IRF3
centr_pathway_IRF4
centr_pathway_IRF5
centr_pathway_IRF7
centr_pathway_IRF9
centr_pathway_ISG15
centr_pathway_ITGA1
centr_pathway_ITGA10
centr_pathway_ITGA11
centr_pathway_ITGA2
centr_pathway_ITGA2B
centr_pathway_ITGA3
centr_pathway_ITGA4
centr_pathway_ITGA5
centr_pathway_ITGA6
centr_pathway_ITGA7
centr_pathway_ITGA8
centr_pathway_ITGA9
centr_pathway_ITGAD
centr_pathway_ITGAE
centr_pathway_ITGAL
centr_pathway_ITGAM
centr_pathway_ITGAV
centr_pathway_ITGAX
centr_pathway_ITGB1
centr_pathway_ITGB1BP2
centr_pathway_ITGB2
centr_pathway_ITGB3
centr_pathway_ITGB3BP
centr_pathway_ITGB4
centr_pathway_ITGB5
centr_pathway_ITGB6
centr_pathway_ITGB7
centr_pathway_ITGB8
centr_pathway_ITGBL1
centr_pathway_ITK
centr_pathway_ITSN1
centr_pathway_ITSN2
centr_pathway_JAM2
centr_pathway_JUN
centr_pathway_KALRN
centr_pathway_KANSL1
centr_pathway_KANSL2
centr_pathway_KANSL3
centr_pathway_KAT5
centr_pathway_KAT8
centr_pathway_KCNB1
centr_pathway_KDM4A
centr_pathway_KDM5A
centr_pathway_KDM6B
centr_pathway_KDR
centr_pathway_KHDRBS1
centr_pathway_KIF18A
centr_pathway_KIF20A
centr_pathway_KIF23
centr_pathway_KIF2A
centr_pathway_KIF2B
centr_pathway_KIF2C
centr_pathway_KIFC3
centr_pathway_KIR2DL1
centr_pathway_KIR2DL2
centr_pathway_KIR2DL3
centr_pathway_KIR2DL4
centr_pathway_KIR2DL5A
centr_pathway_KIR2DS1
centr_pathway_KIR2DS2
centr_pathway_KIR2DS3
centr_pathway_KIR2DS4
centr_pathway_KIR2DS5
centr_pathway_KIR3DL1
centr_pathway_KIR3DL2
centr_pathway_KIR3DL3
centr_pathway_KISS1R
centr_pathway_KIT
centr_pathway_KLF10
centr_pathway_KLHL13
centr_pathway_KLHL9
centr_pathway_KLK1
centr_pathway_KLK2
centr_pathway_KLK4
centr_pathway_KLRC1
centr_pathway_KLRC2
centr_pathway_KLRD1
centr_pathway_KLRG1
centr_pathway_KLRK1
centr_pathway_KMT2D
centr_pathway_KNTC1
centr_pathway_KPNA2
centr_pathway_KPNB1
centr_pathway_KRIT1
centr_pathway_KRT18
centr_pathway_KSR2
centr_pathway_KYNU
centr_pathway_LALBA
centr_pathway_LAMA1
centr_pathway_LAMA2
centr_pathway_LAMA3
centr_pathway_LAMA4
centr_pathway_LAMA5
centr_pathway_LAMB1
centr_pathway_LAMB2
centr_pathway_LAMB3
centr_pathway_LAMB4
centr_pathway_LAMC1
centr_pathway_LAMC2
centr_pathway_LAMC3
centr_pathway_LAP3
centr_pathway_LAT
centr_pathway_LCP1
centr_pathway_LDB1
centr_pathway_LEF1
centr_pathway_LEFTY1
centr_pathway_LEFTY2
centr_pathway_LEP
centr_pathway_LGMN
centr_pathway_LHB
centr_pathway_LHCGR
centr_pathway_LIF
centr_pathway_LILRA6
centr_pathway_LILRB1
centr_pathway_LILRB3
centr_pathway_LILRB4
centr_pathway_LIMA1
centr_pathway_LIMS1
centr_pathway_LIN37
centr_pathway_LIN52
centr_pathway_LIN54
centr_pathway_LIN9
centr_pathway_LMNA
centr_pathway_LMNB1
centr_pathway_LMNB2
centr_pathway_LMO4
centr_pathway_LMO7
centr_pathway_LMTK2
centr_pathway_LMTK3
centr_pathway_LOX
centr_pathway_LOXL1
centr_pathway_LOXL2
centr_pathway_LOXL3
centr_pathway_LOXL4
centr_pathway_LPAR1
centr_pathway_LPAR2
centr_pathway_LPAR3
centr_pathway_LPAR4
centr_pathway_LPAR5
centr_pathway_LPAR6
centr_pathway_LPIN1
centr_pathway_LPIN2
centr_pathway_LPIN3
centr_pathway_LPP
centr_pathway_LRP10
centr_pathway_LRP12
centr_pathway_LRP2
centr_pathway_LRP5
centr_pathway_LTA
centr_pathway_LTB4R
centr_pathway_LTBP1
centr_pathway_LTBP2
centr_pathway_LTBP3
centr_pathway_LTBP4
centr_pathway_LY96
centr_pathway_MAD1L1
centr_pathway_MAD2L1
centr_pathway_MAF
centr_pathway_MAGI1
centr_pathway_MAGI2
centr_pathway_MAN1C1
centr_pathway_MAN2A1
centr_pathway_MAN2A2
centr_pathway_MAOA
centr_pathway_MAP2K1
centr_pathway_MAP2K2
centr_pathway_MAP2K3
centr_pathway_MAP2K4
centr_pathway_MAP2K6
centr_pathway_MAP2K7
centr_pathway_MAP3K1
centr_pathway_MAP3K13
centr_pathway_MAP3K14
centr_pathway_MAP3K2
centr_pathway_MAP3K3
centr_pathway_MAP3K5
centr_pathway_MAP3K7
centr_pathway_MAP4K1
centr_pathway_MAP4K2
centr_pathway_MAP4K3
centr_pathway_MAP4K4
centr_pathway_MAP4K5
centr_pathway_MAPK10
centr_pathway_MAPK11
centr_pathway_MAPK12
centr_pathway_MAPK13
centr_pathway_MAPK14
centr_pathway_MAPK3
centr_pathway_MAPK6
centr_pathway_MAPK7
centr_pathway_MAPK8
centr_pathway_MAPK9
centr_pathway_MAPKAPK2
centr_pathway_MAPKAPK3
centr_pathway_MAPRE1
centr_pathway_MARCO
centr_pathway_MAT1A
centr_pathway_MAT2A
centr_pathway_MAT2B
centr_pathway_MAVS
centr_pathway_MBD2
centr_pathway_MBD3L2
centr_pathway_MC2R
centr_pathway_MCF2
centr_pathway_MCHR1
centr_pathway_MCHR2
centr_pathway_MCM10
centr_pathway_MCM2
centr_pathway_MCM3
centr_pathway_MCM4
centr_pathway_MCM5
centr_pathway_MCM6
centr_pathway_MCM7
centr_pathway_MCM8
centr_pathway_MCPH1
centr_pathway_MDC1
centr_pathway_MDK
centr_pathway_ME2
centr_pathway_MEAF6
centr_pathway_MED13
centr_pathway_MED16
centr_pathway_MED24
centr_pathway_MEN1
centr_pathway_MEP1B
centr_pathway_MEPE
centr_pathway_MERTK
centr_pathway_MFAP1
centr_pathway_MFAP2
centr_pathway_MFAP3
centr_pathway_MFAP4
centr_pathway_MFAP5
centr_pathway_MFNG
centr_pathway_MGAM
centr_pathway_MGAT1
centr_pathway_MGAT3
centr_pathway_MIS12
centr_pathway_MIS18A
centr_pathway_MIS18BP1
centr_pathway_MLC1
centr_pathway_MLEC
centr_pathway_MLH1
centr_pathway_MLH3
centr_pathway_MLKL
centr_pathway_MMP1
centr_pathway_MMP10
centr_pathway_MMP14
centr_pathway_MMP16
centr_pathway_MMP3
centr_pathway_MMP7
centr_pathway_MMRN2
centr_pathway_MND1
centr_pathway_MOB1A
centr_pathway_MOB1B
centr_pathway_MORF4L1
centr_pathway_MORF4L2
centr_pathway_MRC2
centr_pathway_MRGBP
centr_pathway_MS4A2
centr_pathway_MSH2
centr_pathway_MSH3
centr_pathway_MSH4
centr_pathway_MSH5
centr_pathway_MSH6
centr_pathway_MSL1
centr_pathway_MSL3
centr_pathway_MST1R
centr_pathway_MTNR1A
centr_pathway_MX1
centr_pathway_MX2
centr_pathway_MYBL2
centr_pathway_MYD88
centr_pathway_MYH10
centr_pathway_MYH11
centr_pathway_MYH14
centr_pathway_MYH2
centr_pathway_MYH9
centr_pathway_MYL6B
centr_pathway_MYO10
centr_pathway_MYO1B
centr_pathway_MYO1C
centr_pathway_MYO1E
centr_pathway_MYO1F
centr_pathway_MYO5A
centr_pathway_MYO7A
centr_pathway_MYO9A
centr_pathway_MYO9B
centr_pathway_MYOF
centr_pathway_NAA10
centr_pathway_NACA
centr_pathway_NAGA
centr_pathway_NAIP
centr_pathway_NAMPT
centr_pathway_NANP
centr_pathway_NANS
centr_pathway_NBN
centr_pathway_NCAN
centr_pathway_NCAPD2
centr_pathway_NCAPD3
centr_pathway_NCAPG
centr_pathway_NCAPG2
centr_pathway_NCAPH
centr_pathway_NCAPH2
centr_pathway_NCF4
centr_pathway_NCK1
centr_pathway_NCKIPSD
centr_pathway_NCL
centr_pathway_NCOR1
centr_pathway_NCOR2
centr_pathway_NCR1
centr_pathway_NCR3
centr_pathway_NDC80
centr_pathway_NDE1
centr_pathway_NDEL1
centr_pathway_NDST1
centr_pathway_NDST2
centr_pathway_NDST3
centr_pathway_NDST4
centr_pathway_NEDD1
centr_pathway_NEDD4L
centr_pathway_NEDD8
centr_pathway_NEK2
centr_pathway_NEK6
centr_pathway_NEK7
centr_pathway_NEK9
centr_pathway_NFATC1
centr_pathway_NFATC2
centr_pathway_NFATC3
centr_pathway_NFKB1
centr_pathway_NFKBIE
centr_pathway_NGEF
centr_pathway_NGFR
centr_pathway_NID1
centr_pathway_NID2
centr_pathway_NINL
centr_pathway_NLRC4
centr_pathway_NMI
centr_pathway_NMS
centr_pathway_NMU
centr_pathway_NMUR1
centr_pathway_NMUR2
centr_pathway_NNMT
centr_pathway_NOD1
centr_pathway_NOLC1
centr_pathway_NOS2
centr_pathway_NOSTRIN
centr_pathway_NOX1
centr_pathway_NOX3
centr_pathway_NPBWR1
centr_pathway_NPBWR2
centr_pathway_NPFF
centr_pathway_NPHP4
centr_pathway_NPM1
centr_pathway_NPNT
centr_pathway_NPS
centr_pathway_NPSR1
centr_pathway_NPTN
centr_pathway_NPY2R
centr_pathway_NRK
centr_pathway_NSL1
centr_pathway_NSUN2
centr_pathway_NTF3
centr_pathway_NTF4
centr_pathway_NTRK1
centr_pathway_NTRK2
centr_pathway_NTS
centr_pathway_NTSR1
centr_pathway_NUDC
centr_pathway_NUDT5
centr_pathway_NUDT6
centr_pathway_NUDT9
centr_pathway_NUF2
centr_pathway_NUMA1
centr_pathway_NUP107
centr_pathway_NUP133
centr_pathway_NUP153
centr_pathway_NUP155
centr_pathway_NUP160
centr_pathway_NUP188
centr_pathway_NUP205
centr_pathway_NUP210
centr_pathway_NUP214
centr_pathway_NUP35
centr_pathway_NUP37
centr_pathway_NUP43
centr_pathway_NUP50
centr_pathway_NUP54
centr_pathway_NUP62
centr_pathway_NUP85
centr_pathway_NUP88
centr_pathway_NUP93
centr_pathway_NUP98
centr_pathway_NUPL2
centr_pathway_NUTF2
centr_pathway_NVL
centr_pathway_NXF1
centr_pathway_NYS2
centr_pathway_OBSCN
centr_pathway_OCA2
centr_pathway_ODF2
centr_pathway_OFD1
centr_pathway_OGN
centr_pathway_OGT
centr_pathway_OIP5
centr_pathway_ONECUT1
centr_pathway_OPHN1
centr_pathway_OPRK1
centr_pathway_OPRL1
centr_pathway_OPTN
centr_pathway_OR10G2
centr_pathway_OR11H12
centr_pathway_OR2A1
centr_pathway_OR4C45
centr_pathway_OR4E2
centr_pathway_OR4F29
centr_pathway_OR4F3
centr_pathway_OR51F1
centr_pathway_ORC1
centr_pathway_ORC2
centr_pathway_ORC3
centr_pathway_ORC4
centr_pathway_ORC5
centr_pathway_ORC6
centr_pathway_OSCAR
centr_pathway_OSM
centr_pathway_OXER1
centr_pathway_OXGR1
centr_pathway_OXT
centr_pathway_P2RY11
centr_pathway_P2RY14
centr_pathway_P2RY4
centr_pathway_P2RY6
centr_pathway_P3H1
centr_pathway_P3H2
centr_pathway_P3H3
centr_pathway_P4HB
centr_pathway_PABPC1L
centr_pathway_PABPC4L
centr_pathway_PACS1
centr_pathway_PAFAH1B1
centr_pathway_PAG1
centr_pathway_PAK1IP1
centr_pathway_PAK2
centr_pathway_PAK3
centr_pathway_PAK4
centr_pathway_PAK6
centr_pathway_PALB2
centr_pathway_PANK4
centr_pathway_PAPPA2
centr_pathway_PARP1
centr_pathway_PARP3
centr_pathway_PARP6
centr_pathway_PARP8
centr_pathway_PARS2
centr_pathway_PARVB
centr_pathway_PARVG
centr_pathway_PC
centr_pathway_PCDHGA12
centr_pathway_PCM1
centr_pathway_PCNA
centr_pathway_PCNT
centr_pathway_PCOLCE
centr_pathway_PDCD1
centr_pathway_PDCD1LG2
centr_pathway_PDGFA
centr_pathway_PDGFC
centr_pathway_PDGFD
centr_pathway_PDGFRA
centr_pathway_PDIA3
centr_pathway_PDS5A
centr_pathway_PDS5B
centr_pathway_PEBP1
centr_pathway_PECAM1
centr_pathway_PEX13
centr_pathway_PEX14
centr_pathway_PF4
centr_pathway_PF4V1
centr_pathway_PFN1
centr_pathway_PFN3
centr_pathway_PFN4
centr_pathway_PGAM5
centr_pathway_PGAP1
centr_pathway_PGD
centr_pathway_PGF
centr_pathway_PGM2L1
centr_pathway_PHC1
centr_pathway_PHC2
centr_pathway_PHC3
centr_pathway_PHF20
centr_pathway_PHF8
centr_pathway_PHLPP2
centr_pathway_PHOSPHO1
centr_pathway_PHYH
centr_pathway_PI4KA
centr_pathway_PIAS3
centr_pathway_PIDD1
centr_pathway_PIGA
centr_pathway_PIGC
centr_pathway_PIGK
centr_pathway_PIGS
centr_pathway_PIGT
centr_pathway_PIK3AP1
centr_pathway_PIK3C2A
centr_pathway_PIK3C2B
centr_pathway_PIK3C2G
centr_pathway_PIK3C3
centr_pathway_PIK3CA
centr_pathway_PIK3CB
centr_pathway_PIK3CD
centr_pathway_PIK3CG
centr_pathway_PIK3R1
centr_pathway_PIK3R2
centr_pathway_PIK3R3
centr_pathway_PIK3R4
centr_pathway_PIK3R5
centr_pathway_PIM1
centr_pathway_PIN1
centr_pathway_PIP5K1A
centr_pathway_PIR
centr_pathway_PKMYT1
centr_pathway_PKN1
centr_pathway_PKN2
centr_pathway_PLA2R1
centr_pathway_PLAU
centr_pathway_PLAUR
centr_pathway_PLEKHG2
centr_pathway_PLEKHG5
centr_pathway_PLG
centr_pathway_PLK1
centr_pathway_PLK3
centr_pathway_PLK4
centr_pathway_PLOD3
centr_pathway_PLS3
centr_pathway_PLXNB1
centr_pathway_PMCH
centr_pathway_PMF1
centr_pathway_PMS2
centr_pathway_PNKP
centr_pathway_PNP
centr_pathway_POLA1
centr_pathway_POLA2
centr_pathway_POLE
centr_pathway_POLE2
centr_pathway_POM121
centr_pathway_POT1
centr_pathway_POU2F1
centr_pathway_PPARG
centr_pathway_PPBP
centr_pathway_PPCDC
centr_pathway_PPM1B
centr_pathway_PPP1CA
centr_pathway_PPP1R17
centr_pathway_PPP2CB
centr_pathway_PPP2R1A
centr_pathway_PPP2R1B
centr_pathway_PPP2R2B
centr_pathway_PPP2R3C
centr_pathway_PPP2R5A
centr_pathway_PPP2R5C
centr_pathway_PPP2R5D
centr_pathway_PPP2R5E
centr_pathway_PPP5C
centr_pathway_PPY
centr_pathway_PRC1
centr_pathway_PRDM4
centr_pathway_PRDM9
centr_pathway_PRDX1
centr_pathway_PREX1
centr_pathway_PRG2
centr_pathway_PRG4
centr_pathway_PRIM1
centr_pathway_PRIM2
centr_pathway_PRKCI
centr_pathway_PRKCQ
centr_pathway_PRKCZ
centr_pathway_PRKDC
centr_pathway_PRMT1
centr_pathway_PRMT5
centr_pathway_PRMT6
centr_pathway_PROC
centr_pathway_PROCR
centr_pathway_PROK1
centr_pathway_PRPS1
centr_pathway_PRPS1L1
centr_pathway_PRPS2
centr_pathway_PRSS1
centr_pathway_PSEN2
centr_pathway_PSENEN
centr_pathway_PSIP1
centr_pathway_PSMA1
centr_pathway_PSMA2
centr_pathway_PSMA3
centr_pathway_PSMA4
centr_pathway_PSMA5
centr_pathway_PSMA6
centr_pathway_PSMA7
centr_pathway_PSMB1
centr_pathway_PSMB10
centr_pathway_PSMB11
centr_pathway_PSMB2
centr_pathway_PSMB3
centr_pathway_PSMB4
centr_pathway_PSMB5
centr_pathway_PSMB6
centr_pathway_PSMB7
centr_pathway_PSMB8
centr_pathway_PSMB9
centr_pathway_PSMC1
centr_pathway_PSMC2
centr_pathway_PSMC3
centr_pathway_PSMC3IP
centr_pathway_PSMC4
centr_pathway_PSMC5
centr_pathway_PSMC6
centr_pathway_PSMD1
centr_pathway_PSMD10
centr_pathway_PSMD11
centr_pathway_PSMD12
centr_pathway_PSMD13
centr_pathway_PSMD14
centr_pathway_PSMD2
centr_pathway_PSMD3
centr_pathway_PSMD4
centr_pathway_PSMD5
centr_pathway_PSMD6
centr_pathway_PSMD7
centr_pathway_PSMD8
centr_pathway_PSMD9
centr_pathway_PSME1
centr_pathway_PSME2
centr_pathway_PSME3
centr_pathway_PSMF1
centr_pathway_PTAFR
centr_pathway_PTBP1
centr_pathway_PTBP2
centr_pathway_PTCH1
centr_pathway_PTEN
centr_pathway_PTGER2
centr_pathway_PTGER4
centr_pathway_PTGES3
centr_pathway_PTGIR
centr_pathway_PTHLH
centr_pathway_PTK2
centr_pathway_PTK2B
centr_pathway_PTN
centr_pathway_PTP4A1
centr_pathway_PTP4A3
centr_pathway_PTPN1
centr_pathway_PTPN2
centr_pathway_PTPN6
centr_pathway_PTPRC
centr_pathway_PTPRF
centr_pathway_PTTG1
centr_pathway_PTTG2
centr_pathway_PUM1
centr_pathway_PVR
centr_pathway_PXN
centr_pathway_PYCARD
centr_pathway_PYGO1
centr_pathway_PYGO2
centr_pathway_RAB1A
centr_pathway_RAB27A
centr_pathway_RAB2A
centr_pathway_RAB5A
centr_pathway_RAB7A
centr_pathway_RAC1
centr_pathway_RAC2
centr_pathway_RAC3
centr_pathway_RACGAP1
centr_pathway_RAD1
centr_pathway_RAD17
centr_pathway_RAD21
centr_pathway_RAD50
centr_pathway_RAD51
centr_pathway_RAD51C
centr_pathway_RAD52
centr_pathway_RAD9A
centr_pathway_RAD9B
centr_pathway_RAE1
centr_pathway_RALBP1
centr_pathway_RALGAPA2
centr_pathway_RALGAPB
centr_pathway_RAN
centr_pathway_RANBP1
centr_pathway_RANBP10
centr_pathway_RANBP2
centr_pathway_RANGAP1
centr_pathway_RAP1A
centr_pathway_RAP1B
centr_pathway_RAPGEF5
centr_pathway_RASA1
centr_pathway_RASA2
centr_pathway_RASSF5
centr_pathway_RB1
centr_pathway_RBBP4
centr_pathway_RBBP5
centr_pathway_RBBP7
centr_pathway_RBBP8
centr_pathway_RBKS
centr_pathway_RBL1
centr_pathway_RBL2
centr_pathway_RCC1
centr_pathway_RCC2
centr_pathway_RCE1
centr_pathway_RCHY1
centr_pathway_REC8
centr_pathway_RELA
centr_pathway_REST
centr_pathway_RET
centr_pathway_RFC1
centr_pathway_RFC2
centr_pathway_RFC3
centr_pathway_RFC4
centr_pathway_RFC5
centr_pathway_RFFL
centr_pathway_RFX5
centr_pathway_RFXAP
centr_pathway_RGL2
centr_pathway_RGS11
centr_pathway_RGS14
centr_pathway_RGS2
centr_pathway_RGS9
centr_pathway_RING1
centr_pathway_RIPK1
centr_pathway_RLN3
centr_pathway_RMI1
centr_pathway_RMI2
centr_pathway_RND1
centr_pathway_RND2
centr_pathway_RND3
centr_pathway_RNF135
centr_pathway_RNF2
centr_pathway_RNF41
centr_pathway_ROCK1
centr_pathway_ROCK2
centr_pathway_ROR2
centr_pathway_RPA1
centr_pathway_RPA2
centr_pathway_RPA3
centr_pathway_RPA4
centr_pathway_RPE
centr_pathway_RPF1
centr_pathway_RPIA
centr_pathway_RRP8
centr_pathway_RSF1
centr_pathway_RUVBL1
centr_pathway_RUVBL2
centr_pathway_RXFP4
centr_pathway_S100A10
centr_pathway_S100A12
centr_pathway_S100A8
centr_pathway_S100A9
centr_pathway_S100B
centr_pathway_S1PR3
centr_pathway_S1PR4
centr_pathway_SAA1
centr_pathway_SAA2
centr_pathway_SAE1
centr_pathway_SAP130
centr_pathway_SAP18
centr_pathway_SAP30
centr_pathway_SAP30BP
centr_pathway_SAP30L
centr_pathway_SAR1B
centr_pathway_SDC1
centr_pathway_SDC2
centr_pathway_SDC4
centr_pathway_SDCCAG8
centr_pathway_SEC13
centr_pathway_SEC23A
centr_pathway_SEC24A
centr_pathway_SEC24B
centr_pathway_SEC24C
centr_pathway_SEC24D
centr_pathway_SEC31A
centr_pathway_SEH1L
centr_pathway_SEMA4B
centr_pathway_SEMA4D
centr_pathway_SEMA4G
centr_pathway_SEMA5A
centr_pathway_SEPT1
centr_pathway_SEPT2
centr_pathway_SERPINB2
centr_pathway_SERPINB6
centr_pathway_SERPINB8
centr_pathway_SERPINE1
centr_pathway_SERPINE2
centr_pathway_SERPING1
centr_pathway_SERPINH1
centr_pathway_SET
centr_pathway_SFI1
centr_pathway_SH2D2A
centr_pathway_SH3BP2
centr_pathway_SH3D19
centr_pathway_SH3GL2
centr_pathway_SH3KBP1
centr_pathway_SH3RF1
centr_pathway_SHB
centr_pathway_SHC1
centr_pathway_SHC2
centr_pathway_SHC3
centr_pathway_SHH
centr_pathway_SI
centr_pathway_SIGIRR
centr_pathway_SIN3A
centr_pathway_SIN3B
centr_pathway_SIPA1
centr_pathway_SIPA1L1
centr_pathway_SIPA1L2
centr_pathway_SIRPB1
centr_pathway_SIRPG
centr_pathway_SIRT1
centr_pathway_SKA1
centr_pathway_SKA2
centr_pathway_SKAP1
centr_pathway_SKP2
centr_pathway_SLBP
centr_pathway_SLC16A1
centr_pathway_SLC1A5
centr_pathway_SLC2A10
centr_pathway_SLK
centr_pathway_SMAD3
centr_pathway_SMAD4
centr_pathway_SMARCA5
centr_pathway_SMC1A
centr_pathway_SMC1B
centr_pathway_SMC2
centr_pathway_SMC3
centr_pathway_SMC4
centr_pathway_SMN2
centr_pathway_SNAI1
centr_pathway_SNAI2
centr_pathway_SND1
centr_pathway_SNUPN
centr_pathway_SNURF
centr_pathway_SNX6
centr_pathway_SOCS2
centr_pathway_SOCS4
centr_pathway_SOCS5
centr_pathway_SOCS7
centr_pathway_SOD2
centr_pathway_SOD3
centr_pathway_SORBS1
centr_pathway_SOS1
centr_pathway_SOST
centr_pathway_SOX17
centr_pathway_SP100
centr_pathway_SPATA13
centr_pathway_SPC24
centr_pathway_SPC25
centr_pathway_SPDL1
centr_pathway_SPDYA
centr_pathway_SPDYC
centr_pathway_SPOCK1
centr_pathway_SPOCK2
centr_pathway_SPOCK3
centr_pathway_SPON1
centr_pathway_SPON2
centr_pathway_SPP1
centr_pathway_SPRY1
centr_pathway_SRC
centr_pathway_SRF
centr_pathway_SRGAP1
centr_pathway_SRGAP2
centr_pathway_SRGAP3
centr_pathway_SSNA1
centr_pathway_SSX2IP
centr_pathway_STAG1
centr_pathway_STAG2
centr_pathway_STAG3
centr_pathway_STARD13
centr_pathway_STARD8
centr_pathway_STAT5B
centr_pathway_STAT6
centr_pathway_STEAP3
centr_pathway_STK3
centr_pathway_STK4
centr_pathway_STT3B
centr_pathway_STX4
centr_pathway_SUDS3
centr_pathway_SUMO1
centr_pathway_SUN1
centr_pathway_SUN2
centr_pathway_SUV39H1
centr_pathway_SUZ12
centr_pathway_SYCP2
centr_pathway_SYCP3
centr_pathway_SYDE1
centr_pathway_SYDE2
centr_pathway_SYK
centr_pathway_SYNE1
centr_pathway_SYNE2
centr_pathway_TAB1
centr_pathway_TACC1
centr_pathway_TACC3
centr_pathway_TAGAP
centr_pathway_TANK
centr_pathway_TAOK1
centr_pathway_TARBP2
centr_pathway_TAS2R1
centr_pathway_TAS2R10
centr_pathway_TAS2R13
centr_pathway_TAS2R14
centr_pathway_TAS2R16
centr_pathway_TAS2R19
centr_pathway_TAS2R20
centr_pathway_TAS2R30
centr_pathway_TAS2R31
centr_pathway_TAS2R38
centr_pathway_TAS2R39
centr_pathway_TAS2R40
centr_pathway_TAS2R41
centr_pathway_TAS2R43
centr_pathway_TAS2R46
centr_pathway_TAS2R5
centr_pathway_TAS2R50
centr_pathway_TAS2R60
centr_pathway_TAS2R7
centr_pathway_TAS2R8
centr_pathway_TAS2R9
centr_pathway_TBCB
centr_pathway_TBK1
centr_pathway_TBL1X
centr_pathway_TBL1XR1
centr_pathway_TBPL1
centr_pathway_TBPL2
centr_pathway_TBRG1
centr_pathway_TCF7
centr_pathway_TCF7L1
centr_pathway_TCF7L2
centr_pathway_TCP1
centr_pathway_TDGF1
centr_pathway_TDO2
centr_pathway_TDP1
centr_pathway_TDP2
centr_pathway_TDRD7
centr_pathway_TEC
centr_pathway_TEK
centr_pathway_TERF1
centr_pathway_TERF2
centr_pathway_TERF2IP
centr_pathway_TERT
centr_pathway_TEX15
centr_pathway_TFCP2
centr_pathway_TFDP1
centr_pathway_TFDP2
centr_pathway_TFPI
centr_pathway_TGFA
centr_pathway_TGFB1
centr_pathway_TGFB2
centr_pathway_TGFB3
centr_pathway_TGFBI
centr_pathway_TGFBR1
centr_pathway_TGFBR2
centr_pathway_TGIF1
centr_pathway_TGIF2
centr_pathway_TGM2
centr_pathway_THBD
[truncated: 217 more rows]

## Sheet: all_p
centr_pathway_AASDHPPT
centr_pathway_ACAP2
centr_pathway_ALCAM
centr_pathway_ANKRA2
centr_pathway_AP3B2
centr_pathway_ARTN
centr_pathway_ATP5A1
centr_pathway_ATP5C1
centr_pathway_ATP5D
centr_pathway_ATP5E
centr_pathway_ATP5F1
centr_pathway_ATP5G2
centr_pathway_BAMBI
centr_pathway_BCL2
centr_pathway_C4A
centr_pathway_CACNA1A
centr_pathway_CACNA1S
centr_pathway_CACNA2D2
centr_pathway_CACNB1
centr_pathway_CAMK2N2
centr_pathway_CAMK4
centr_pathway_CAMSAP3
centr_pathway_CAPN10
centr_pathway_CAPN11
centr_pathway_CAPN2
centr_pathway_CAPN3
centr_pathway_CAPN5
centr_pathway_CAPN6
centr_pathway_CAPN7
centr_pathway_CAPN9
centr_pathway_CAPNS1
centr_pathway_CBLC
centr_pathway_CCS
centr_pathway_CD24
centr_pathway_CD34
centr_pathway_CD4
centr_pathway_CDK10
centr_pathway_CDK3
centr_pathway_CDS1
centr_pathway_CDS2
centr_pathway_CHRNA4
centr_pathway_CHRNB2
centr_pathway_CKMT1B
centr_pathway_CRK
centr_pathway_CTSD
centr_pathway_CTSS
centr_pathway_CYP17A1
centr_pathway_CYP2F1
centr_pathway_DLG1
centr_pathway_DLG2
centr_pathway_DLG3
centr_pathway_DLG4
centr_pathway_DLGAP1
centr_pathway_DOK4
centr_pathway_DUSP16
centr_pathway_EIF2A
centr_pathway_ENAH
centr_pathway_FADD
centr_pathway_FADS6
centr_pathway_FOXO6
centr_pathway_FRA11D
centr_pathway_GABRB3
centr_pathway_GABRD
centr_pathway_GABRG2
centr_pathway_GADD45A
centr_pathway_GADD45B
centr_pathway_GADD45G
centr_pathway_GAMT
centr_pathway_gdhA
centr_pathway_GFRA2
centr_pathway_GFRA4
centr_pathway_GHR
centr_pathway_GHRL
centr_pathway_GIT1
centr_pathway_GLO1
centr_pathway_GLS2
centr_pathway_GPR50
centr_pathway_GRIA1
centr_pathway_GRIN1
centr_pathway_GRIN2A
centr_pathway_GRIN2B
centr_pathway_GRIN2C
centr_pathway_GRIN2D
centr_pathway_GRIN3A
centr_pathway_GUCY1A2
centr_pathway_GUCY1A3
centr_pathway_GUCY1B3
centr_pathway_HSD11B1
centr_pathway_IDI2
centr_pathway_IFNA13
centr_pathway_IFNA14
centr_pathway_IFNA16
centr_pathway_IFNA17
centr_pathway_IFNA2
centr_pathway_IFNA21
centr_pathway_IFNA4
centr_pathway_IFNA5
centr_pathway_IFNA6
centr_pathway_IFNA7
centr_pathway_IFNA8
centr_pathway_IFNAR1
centr_pathway_INPP1
centr_pathway_KCND2
centr_pathway_KCNIP2
centr_pathway_KCNIP3
centr_pathway_KCNJ11
centr_pathway_LCP2
centr_pathway_LLGL1
centr_pathway_LRP1
centr_pathway_MARCKS
centr_pathway_MCRS1
centr_pathway_MEF2C
centr_pathway_MGAT4C
centr_pathway_MIR101.1
centr_pathway_MIR101.2
centr_pathway_MIR124.1
centr_pathway_MIR124.2
centr_pathway_MIR124.3
centr_pathway_MIR137
centr_pathway_MIR331
centr_pathway_MIR345
centr_pathway_MIR34A
centr_pathway_MIR34B
centr_pathway_MIRLET7A1
centr_pathway_MIRLET7A2
centr_pathway_MIRLET7A3
centr_pathway_MIRLET7B
centr_pathway_MIRLET7C
centr_pathway_MIRLET7D
centr_pathway_MIRLET7E
centr_pathway_MIRLET7F1
centr_pathway_MIRLET7F2
centr_pathway_MIRLET7G
centr_pathway_MIRLET7I
centr_pathway_MMP9
centr_pathway_MRVI1
centr_pathway_MSMO1
centr_pathway_MT.ATP6
centr_pathway_MTAP
centr_pathway_MVD
centr_pathway_NFKBIA
centr_pathway_NLRP4
centr_pathway_NME1.NME2
centr_pathway_NR3C2
centr_pathway_NRTN
centr_pathway_PARP9
centr_pathway_PCSK2
centr_pathway_PCYT1A
centr_pathway_PDC
centr_pathway_PERP
centr_pathway_PIAS1
centr_pathway_PIAS4
centr_pathway_PPFIA1
centr_pathway_PPFIA2
centr_pathway_PPFIA3
centr_pathway_PPIB
centr_pathway_PPP1CC
centr_pathway_PPP1R12A
centr_pathway_PRDX3
centr_pathway_PRL
centr_pathway_PRLR
centr_pathway_PSPN
centr_pathway_PTPN11
centr_pathway_PTPRB
centr_pathway_PTPRJ
centr_pathway_PYCR2
centr_pathway_RAB3A
centr_pathway_RHO
centr_pathway_RIMS2
centr_pathway_RPRM
centr_pathway_RUNX1T1
centr_pathway_SCD
centr_pathway_SCD5
centr_pathway_SCN10A
centr_pathway_SELL
centr_pathway_SLC18A2
centr_pathway_SLC18A3
centr_pathway_SLC22A6
centr_pathway_SLC22A8
centr_pathway_SLC5A5
centr_pathway_SLC8A2
centr_pathway_SLCO1A2
centr_pathway_SMAD7
centr_pathway_SMURF2
centr_pathway_SPHKAP
centr_pathway_ST8SIA2
centr_pathway_STX1A
centr_pathway_STX1B
centr_pathway_STX2
centr_pathway_SYN1
centr_pathway_SYN2
centr_pathway_SYN3
centr_pathway_TNNT1
centr_pathway_TOMM40
centr_pathway_TXN2
centr_pathway_UCN
centr_pathway_UNC13B
centr_pathway_WEE2
centr_pathway_WWOX
centr_pathway_YWHAE
centr_pathway_ZBP1

## Sheet: MGMT meth_m
centr_pathway_AATF
centr_pathway_ABCC10
centr_pathway_ABR
centr_pathway_ACD
centr_pathway_ACTB
centr_pathway_ACTG1
centr_pathway_ACTR2
centr_pathway_ACTR3
centr_pathway_ADM
centr_pathway_ADM2
centr_pathway_ADRA1D
centr_pathway_AES
centr_pathway_AGL
centr_pathway_AGTR1
centr_pathway_AHCTF1
centr_pathway_AKT2
centr_pathway_ALPL
centr_pathway_ALPP
centr_pathway_ALPPL2
centr_pathway_AMD1
centr_pathway_AMY2B
centr_pathway_ANXA1
centr_pathway_ANXA2
centr_pathway_APCS
centr_pathway_APLN
centr_pathway_APLNR
centr_pathway_ARAP1
centr_pathway_ARAP2
centr_pathway_ARAP3
centr_pathway_ARHGAP10
centr_pathway_ARHGAP11A
centr_pathway_ARHGAP11B
centr_pathway_ARHGAP12
centr_pathway_ARHGAP15
centr_pathway_ARHGAP17
centr_pathway_ARHGAP18
centr_pathway_ARHGAP19
centr_pathway_ARHGAP20
centr_pathway_ARHGAP22
centr_pathway_ARHGAP23
centr_pathway_ARHGAP24
centr_pathway_ARHGAP25
centr_pathway_ARHGAP26
centr_pathway_ARHGAP29
centr_pathway_ARHGAP30
centr_pathway_ARHGAP31
centr_pathway_ARHGAP32
centr_pathway_ARHGAP33
centr_pathway_ARHGAP36
centr_pathway_ARHGAP39
centr_pathway_ARHGAP4
centr_pathway_ARHGAP44
centr_pathway_ARHGAP5
centr_pathway_ARHGAP6
centr_pathway_ARHGAP8
centr_pathway_ARHGAP9
centr_pathway_ARHGDIB
centr_pathway_ARHGEF17
centr_pathway_ARID4B
centr_pathway_ARPC1A
centr_pathway_ARPC2
centr_pathway_ARPC3
centr_pathway_ARPC4
centr_pathway_ARPC5
centr_pathway_ASAP3
centr_pathway_ASH2L
centr_pathway_ASPH
centr_pathway_ATR
centr_pathway_ATRIP
centr_pathway_AURKA
centr_pathway_AURKB
centr_pathway_AURKC
centr_pathway_AVPR2
centr_pathway_B3GALNT1
centr_pathway_B9D2
centr_pathway_BACH1
centr_pathway_BATF3
centr_pathway_BAZ2A
centr_pathway_BCAR1
centr_pathway_BCAT1
centr_pathway_BCAT2
centr_pathway_BCL9
centr_pathway_BCL9L
centr_pathway_BDKRB1
centr_pathway_BDKRB2
centr_pathway_BDNF
centr_pathway_BIRC2
centr_pathway_BIRC3
centr_pathway_BIRC5
centr_pathway_BLM
centr_pathway_BMI1
centr_pathway_BMP10
centr_pathway_BMP15
centr_pathway_BMP3
centr_pathway_BMP5
centr_pathway_BMP6
centr_pathway_BMP8A
centr_pathway_BRCA2
centr_pathway_BRD8
centr_pathway_BTK
centr_pathway_BUB1
centr_pathway_BUB3
centr_pathway_C1R
centr_pathway_C1S
centr_pathway_C3AR1
centr_pathway_C5
centr_pathway_C5AR1
centr_pathway_CALCR
centr_pathway_CASP1
centr_pathway_CASP10
centr_pathway_CASP2
centr_pathway_CASP3
centr_pathway_CASP6
centr_pathway_CASP7
centr_pathway_CASP8
centr_pathway_CASR
centr_pathway_CBX2
centr_pathway_CBX4
centr_pathway_CBX6
centr_pathway_CBX8
centr_pathway_CCL25
centr_pathway_CCNB1
centr_pathway_CD14
centr_pathway_CD19
centr_pathway_CD209
centr_pathway_CD302
centr_pathway_CD3D
centr_pathway_CD44
centr_pathway_CDC20
centr_pathway_CDC25A
centr_pathway_CDC25B
centr_pathway_CDC25C
centr_pathway_CDC42BPA
centr_pathway_CDC7
centr_pathway_CDCA5
centr_pathway_CDCA8
centr_pathway_CDK4
centr_pathway_CDK6
centr_pathway_CDKN1C
centr_pathway_CDKN2A
centr_pathway_CDT1
centr_pathway_CEBPB
centr_pathway_CENPA
centr_pathway_CENPC
centr_pathway_CENPE
centr_pathway_CENPF
centr_pathway_CENPH
centr_pathway_CENPI
centr_pathway_CENPK
centr_pathway_CENPL
centr_pathway_CENPM
centr_pathway_CENPN
centr_pathway_CENPO
centr_pathway_CENPP
centr_pathway_CENPQ
centr_pathway_CENPT
centr_pathway_CENPU
centr_pathway_CFLAR
centr_pathway_CHEK1
centr_pathway_CHEK2
centr_pathway_CHN1
centr_pathway_CHN2
centr_pathway_CHRNA1
centr_pathway_CHUK
centr_pathway_CISH
centr_pathway_CLASP2
centr_pathway_CLSPN
centr_pathway_CLTC
centr_pathway_COL10A1
centr_pathway_COL11A1
centr_pathway_COL11A2
centr_pathway_COL12A1
centr_pathway_COL13A1
centr_pathway_COL14A1
centr_pathway_COL15A1
centr_pathway_COL16A1
centr_pathway_COL17A1
centr_pathway_COL18A1
centr_pathway_COL19A1
centr_pathway_COL1A1
centr_pathway_COL1A2
centr_pathway_COL20A1
centr_pathway_COL21A1
centr_pathway_COL22A1
centr_pathway_COL23A1
centr_pathway_COL24A1
centr_pathway_COL25A1
centr_pathway_COL26A1
centr_pathway_COL27A1
centr_pathway_COL28A1
centr_pathway_COL2A1
centr_pathway_COL3A1
centr_pathway_COL4A1
centr_pathway_COL4A2
centr_pathway_COL4A3
centr_pathway_COL4A4
centr_pathway_COL4A5
centr_pathway_COL4A6
centr_pathway_COL5A1
centr_pathway_COL5A2
centr_pathway_COL5A3
centr_pathway_COL6A1
centr_pathway_COL6A2
centr_pathway_COL6A3
centr_pathway_COL6A5
centr_pathway_COL6A6
centr_pathway_COL7A1
centr_pathway_COL8A1
centr_pathway_COL8A2
centr_pathway_COL9A1
centr_pathway_COL9A2
centr_pathway_COL9A3
centr_pathway_COLGALT1
centr_pathway_COLGALT2
centr_pathway_CP
centr_pathway_CPEB1
centr_pathway_CPEB2
centr_pathway_CPEB3
centr_pathway_CREBBP
centr_pathway_CRKL
centr_pathway_CROT
centr_pathway_CRP
centr_pathway_CRTAP
centr_pathway_CSK
centr_pathway_CTHRC1
centr_pathway_CTRC
centr_pathway_CTSA
centr_pathway_CTSB
centr_pathway_CTSC
centr_pathway_CTSE
centr_pathway_CTSF
centr_pathway_CTSV
centr_pathway_CXCL1
centr_pathway_CXCL11
centr_pathway_CXCL13
centr_pathway_CXCL2
centr_pathway_CXCL3
centr_pathway_CXCL9
centr_pathway_CXXC4
centr_pathway_CYR61
centr_pathway_DAG1
centr_pathway_DAXX
centr_pathway_DBF4
centr_pathway_DEPDC1B
centr_pathway_DEPDC7
centr_pathway_DERA
centr_pathway_DIAPH3
centr_pathway_DICER1
centr_pathway_DLC1
centr_pathway_DLGAP5
centr_pathway_DMC1
centr_pathway_DNM2
centr_pathway_DNMT1
centr_pathway_DNMT3A
centr_pathway_DNMT3B
centr_pathway_DOCK11
centr_pathway_DSN1
centr_pathway_DTYMK
centr_pathway_DUT
centr_pathway_DYNC1H1
centr_pathway_DYNC1I2
centr_pathway_DYNLL1
centr_pathway_E2F2
centr_pathway_E2F3
centr_pathway_E2F4
centr_pathway_E2F5
centr_pathway_ECM2
centr_pathway_ECT2
centr_pathway_EED
centr_pathway_EGR4
centr_pathway_EHMT1
centr_pathway_EHMT2
centr_pathway_EIF6
centr_pathway_ELF1
centr_pathway_ELK1
centr_pathway_ELN
centr_pathway_ELP2
centr_pathway_ENPP1
centr_pathway_ENPP3
centr_pathway_EP300
centr_pathway_EPC1
centr_pathway_EPHB2
centr_pathway_EPO
centr_pathway_EPYC
centr_pathway_ERCC6L
centr_pathway_ESPL1
centr_pathway_EVI5
centr_pathway_EXT1
centr_pathway_EXT2
centr_pathway_EZH2
centr_pathway_F2RL2
centr_pathway_F7
centr_pathway_FAM13A
centr_pathway_FAM13B
centr_pathway_FBLIM1
centr_pathway_FBN1
centr_pathway_FBN2
centr_pathway_FBN3
centr_pathway_FBXO5
centr_pathway_FCER1G
centr_pathway_FER
centr_pathway_FERMT2
centr_pathway_FGA
centr_pathway_FGB
centr_pathway_FGD1
centr_pathway_FGD2
centr_pathway_FGD3
centr_pathway_FGD4
centr_pathway_FGF17
centr_pathway_FGG
centr_pathway_FKBP3
centr_pathway_FLT3
centr_pathway_FN1
centr_pathway_FOSL1
centr_pathway_FOXP3
centr_pathway_FPR3
centr_pathway_FRA16A
centr_pathway_FREM2
centr_pathway_GALE
centr_pathway_GALR2
centr_pathway_GANAB
centr_pathway_GAS1
centr_pathway_GBE1
centr_pathway_GH1
centr_pathway_GH2
centr_pathway_GIP
centr_pathway_GLCE
centr_pathway_GMIP
centr_pathway_GNA13
centr_pathway_GNRH1
centr_pathway_GOLGA2
centr_pathway_GORASP1
centr_pathway_GP1BA
centr_pathway_GP1BB
centr_pathway_GP5
centr_pathway_GP6
centr_pathway_GP9
centr_pathway_GPC5
centr_pathway_GPR132
centr_pathway_GPR18
centr_pathway_GPR4
centr_pathway_GPR55
centr_pathway_GPR68
centr_pathway_GPS2
centr_pathway_GSC
centr_pathway_GSK3B
centr_pathway_GSN
centr_pathway_GTSE1
centr_pathway_GZMA
centr_pathway_GZMB
centr_pathway_H2AFB1
centr_pathway_H2AFX
centr_pathway_H2AFZ
centr_pathway_H3F3B
centr_pathway_HDAC10
centr_pathway_HDAC8
centr_pathway_HDGF
centr_pathway_HERC5
centr_pathway_HIST1H2AB
centr_pathway_HIST1H2AC
centr_pathway_HIST1H2AD
centr_pathway_HIST1H2AJ
centr_pathway_HIST1H2BA
centr_pathway_HIST1H2BB
centr_pathway_HIST1H2BC
centr_pathway_HIST1H2BD
centr_pathway_HIST1H2BH
centr_pathway_HIST1H2BJ
centr_pathway_HIST1H2BK
centr_pathway_HIST1H2BL
centr_pathway_HIST1H2BM
centr_pathway_HIST1H2BN
centr_pathway_HIST1H2BO
centr_pathway_HIST2H2AA3
centr_pathway_HIST2H2AC
centr_pathway_HIST2H2BE
centr_pathway_HIST2H3D
centr_pathway_HIST2H4A
centr_pathway_HIST3H2BB
centr_pathway_HIST3H3
centr_pathway_HJURP
centr_pathway_HLA.DPA1
centr_pathway_HLA.DPB1
centr_pathway_HLA.DQA1
centr_pathway_HLA.DQA2
centr_pathway_HLA.DQB1
centr_pathway_HLA.DQB2
centr_pathway_HLA.DRB3
centr_pathway_HLA.DRB4
centr_pathway_HLA.DRB5
centr_pathway_HPSE
centr_pathway_HRG
centr_pathway_HS2ST1
centr_pathway_HS3ST1
centr_pathway_HS3ST3B1
centr_pathway_HS3ST4
centr_pathway_HS6ST1
centr_pathway_HSPD1
centr_pathway_HYAL2
centr_pathway_ICMT
centr_pathway_IFI16
centr_pathway_IGF1R
centr_pathway_IGFBP2
centr_pathway_IGHG1
centr_pathway_IGHG3
centr_pathway_IKBKAP
centr_pathway_IKBKB
centr_pathway_IKBKG
centr_pathway_IL11
centr_pathway_IL12A
centr_pathway_IL12B
centr_pathway_IL18RAP
centr_pathway_IL1A
centr_pathway_IL1B
centr_pathway_IL1RAP
centr_pathway_IL2
centr_pathway_IL20
centr_pathway_IL21
centr_pathway_IL22
centr_pathway_IL2RA
centr_pathway_IL3
centr_pathway_IL4
centr_pathway_IL6
centr_pathway_IL9
centr_pathway_ILK
centr_pathway_IMPG1
centr_pathway_IMPG2
centr_pathway_INCENP
centr_pathway_ING3
centr_pathway_IQGAP2
centr_pathway_IQGAP3
centr_pathway_IRAK3
centr_pathway_IRF4
centr_pathway_IRF7
centr_pathway_IRF9
centr_pathway_ISG15
centr_pathway_ITGA1
centr_pathway_ITGA10
centr_pathway_ITGA11
centr_pathway_ITGA2
centr_pathway_ITGA2B
centr_pathway_ITGA3
centr_pathway_ITGA4
centr_pathway_ITGA5
centr_pathway_ITGA6
centr_pathway_ITGA7
centr_pathway_ITGA8
centr_pathway_ITGA9
centr_pathway_ITGAD
centr_pathway_ITGAE
centr_pathway_ITGAL
centr_pathway_ITGAM
centr_pathway_ITGAV
centr_pathway_ITGAX
centr_pathway_ITGB1
centr_pathway_ITGB1BP2
centr_pathway_ITGB2
centr_pathway_ITGB3
centr_pathway_ITGB3BP
centr_pathway_ITGB4
centr_pathway_ITGB5
centr_pathway_ITGB6
centr_pathway_ITGB7
centr_pathway_ITGBL1
centr_pathway_ITK
centr_pathway_ITSN1
centr_pathway_ITSN2
centr_pathway_JUN
centr_pathway_KALRN
centr_pathway_KANSL2
centr_pathway_KANSL3
centr_pathway_KAT5
centr_pathway_KDM4A
centr_pathway_KDM6B
centr_pathway_KIF18A
centr_pathway_KIF20A
centr_pathway_KIF23
centr_pathway_KIF2A
centr_pathway_KIF2B
centr_pathway_KIF2C
centr_pathway_KISS1R
centr_pathway_KIT
centr_pathway_KLK13
centr_pathway_KLK2
centr_pathway_KLRC2
centr_pathway_KLRD1
centr_pathway_KLRK1
centr_pathway_KMT2D
centr_pathway_KNTC1
centr_pathway_KRIT1
centr_pathway_KRT18
centr_pathway_LALBA
centr_pathway_LAMA1
centr_pathway_LAMA2
centr_pathway_LAMA3
centr_pathway_LAMA4
centr_pathway_LAMA5
centr_pathway_LAMB1
centr_pathway_LAMB2
centr_pathway_LAMB3
centr_pathway_LAMB4
centr_pathway_LAMC1
centr_pathway_LAMC2
centr_pathway_LAMC3
centr_pathway_LAT
centr_pathway_LDB1
centr_pathway_LEF1
centr_pathway_LEFTY2
centr_pathway_LHB
centr_pathway_LMNA
centr_pathway_LMNB1
centr_pathway_LMNB2
centr_pathway_LMO4
centr_pathway_LMTK2
centr_pathway_LMTK3
centr_pathway_LOX
centr_pathway_LOXL1
centr_pathway_LOXL2
centr_pathway_LOXL3
centr_pathway_LOXL4
centr_pathway_LPAR2
centr_pathway_LPIN2
centr_pathway_LPIN3
centr_pathway_LPP
centr_pathway_LRP10
centr_pathway_LRP12
centr_pathway_LTB4R
centr_pathway_LTBP3
centr_pathway_LTBP4
centr_pathway_LY96
centr_pathway_MAD1L1
centr_pathway_MAD2L1
centr_pathway_MAF
centr_pathway_MAN1C1
centr_pathway_MAP2K3
centr_pathway_MAP2K6
centr_pathway_MAP4K2
centr_pathway_MAP4K5
centr_pathway_MAPK10
centr_pathway_MAPK11
centr_pathway_MAPK13
centr_pathway_MAPK14
centr_pathway_MAPK7
centr_pathway_MAPK9
centr_pathway_MAPKAPK2
centr_pathway_MAPKAPK3
centr_pathway_MBD2
centr_pathway_MCHR2
centr_pathway_MCM8
centr_pathway_MEAF6
centr_pathway_MEN1
centr_pathway_MERTK
centr_pathway_MFAP2
centr_pathway_MFAP5
centr_pathway_MGAT1
centr_pathway_MIS12
centr_pathway_MIS18A
centr_pathway_MIS18BP1
centr_pathway_MLKL
centr_pathway_MMP3
centr_pathway_MMRN2
centr_pathway_MND1
centr_pathway_MOB1A
centr_pathway_MOB1B
centr_pathway_MORF4L1
centr_pathway_MORF4L2
centr_pathway_MRGBP
centr_pathway_MSH4
centr_pathway_MSH5
centr_pathway_MSL3
centr_pathway_MYBL2
centr_pathway_MYD88
centr_pathway_MYH9
centr_pathway_MYO5A
centr_pathway_MYO9B
centr_pathway_MYOF
centr_pathway_NACA
centr_pathway_NANP
centr_pathway_NCAPD2
centr_pathway_NCAPD3
centr_pathway_NCAPG
centr_pathway_NCAPG2
centr_pathway_NCAPH2
centr_pathway_NCK1
centr_pathway_NCOR2
centr_pathway_NCR1
centr_pathway_NDC80
centr_pathway_NDST2
centr_pathway_NFATC1
centr_pathway_NFKB1
centr_pathway_NID1
centr_pathway_NMB
centr_pathway_NMU
centr_pathway_NMUR1
centr_pathway_NNMT
centr_pathway_NOD1
centr_pathway_NOLC1
centr_pathway_NOX1
centr_pathway_NOX3
centr_pathway_NPHP4
centr_pathway_NPM1
centr_pathway_NRK
centr_pathway_NSL1
centr_pathway_NTF3
centr_pathway_NTF4
centr_pathway_NUDC
centr_pathway_NUDT9
centr_pathway_NUF2
centr_pathway_NVL
centr_pathway_OBSCN
centr_pathway_OCA2
centr_pathway_OGN
centr_pathway_OGT
centr_pathway_OIP5
centr_pathway_OPHN1
centr_pathway_OPRL1
centr_pathway_OPTN
centr_pathway_OR10G2
centr_pathway_OR11H12
centr_pathway_OR2A1
centr_pathway_OR4C45
centr_pathway_OR4E2
centr_pathway_OR4F29
centr_pathway_OR4F3
centr_pathway_OR51F1
centr_pathway_ORC1
centr_pathway_ORC2
centr_pathway_ORC3
centr_pathway_ORC4
centr_pathway_ORC5
centr_pathway_ORC6
centr_pathway_OXT
centr_pathway_P2RY14
centr_pathway_P2RY4
centr_pathway_P3H1
centr_pathway_P3H2
centr_pathway_P3H3
centr_pathway_P4HB
centr_pathway_PACS1
centr_pathway_PAK2
centr_pathway_PAK3
centr_pathway_PAK4
centr_pathway_PAK6
centr_pathway_PAPPA2
centr_pathway_PARP1
centr_pathway_PARP3
centr_pathway_PARVB
centr_pathway_PCOLCE
centr_pathway_PDGFD
centr_pathway_PDS5A
centr_pathway_PDS5B
centr_pathway_PEX13
centr_pathway_PEX14
centr_pathway_PF4
centr_pathway_PHC1
centr_pathway_PHC2
centr_pathway_PHC3
centr_pathway_PHF20
centr_pathway_PHF8
centr_pathway_PHYH
centr_pathway_PI4KA
centr_pathway_PIK3AP1
centr_pathway_PIK3C2G
centr_pathway_PIK3CB
centr_pathway_PIK3R1
centr_pathway_PIK3R2
centr_pathway_PIK3R3
centr_pathway_PKMYT1
centr_pathway_PLA2R1
centr_pathway_PLAU
centr_pathway_PLAUR
centr_pathway_PLEKHG2
centr_pathway_PLEKHG5
centr_pathway_PLG
centr_pathway_PLK1
centr_pathway_PLK3
centr_pathway_PLOD3
centr_pathway_PMCH
centr_pathway_PMF1
centr_pathway_POT1
centr_pathway_PPP1CA
centr_pathway_PPP2CB
centr_pathway_PPP2R1B
centr_pathway_PPP2R5A
centr_pathway_PPP2R5C
centr_pathway_PPP2R5D
centr_pathway_PPP2R5E
centr_pathway_PPY
centr_pathway_PRC1
centr_pathway_PRDM4
centr_pathway_PRDM9
centr_pathway_PRG4
centr_pathway_PRKCI
centr_pathway_PRKCQ
centr_pathway_PRKCZ
centr_pathway_PRMT6
centr_pathway_PROCR
centr_pathway_PSMC3IP
centr_pathway_PTBP2
centr_pathway_PTCH1
centr_pathway_PTGER2
centr_pathway_PTGIR
centr_pathway_PTK2B
centr_pathway_PTP4A1
centr_pathway_PTP4A3
centr_pathway_PTPN2
centr_pathway_PTPN6
centr_pathway_PTPRC
centr_pathway_PTPRF
centr_pathway_PTTG1
centr_pathway_PYGO1
centr_pathway_PYGO2
centr_pathway_RAB1A
centr_pathway_RAD17
centr_pathway_RAD21
centr_pathway_RAD51
centr_pathway_RAD51C
centr_pathway_RAD52
centr_pathway_RALBP1
centr_pathway_RANBP10
centr_pathway_RASA2
centr_pathway_RB1
centr_pathway_RBBP4
centr_pathway_RBBP5
centr_pathway_RBBP7
centr_pathway_RBL1
centr_pathway_RBL2
centr_pathway_RCC1
centr_pathway_RCC2
centr_pathway_RFX5
centr_pathway_RGS14
centr_pathway_RGS2
centr_pathway_RING1
centr_pathway_RIPK1
centr_pathway_RNF135
centr_pathway_RNF2
centr_pathway_RPA1
centr_pathway_RPA2
centr_pathway_RPE
centr_pathway_RPF1
centr_pathway_RPIA
centr_pathway_RRP8
centr_pathway_RSF1
centr_pathway_RUVBL1
centr_pathway_RXFP4
centr_pathway_S100A10
centr_pathway_SAA1
centr_pathway_SAA2
centr_pathway_SAP130
centr_pathway_SAP18
centr_pathway_SAP30
centr_pathway_SAP30BP
centr_pathway_SAP30L
centr_pathway_SDC4
centr_pathway_SEC13
centr_pathway_SEPT1
centr_pathway_SERPINB2
centr_pathway_SERPINB6
centr_pathway_SERPINB8
centr_pathway_SERPINE1
centr_pathway_SERPINE2
centr_pathway_SERPING1
centr_pathway_SERPINH1
centr_pathway_SET
centr_pathway_SH3GL2
centr_pathway_SH3KBP1
centr_pathway_SIN3A
centr_pathway_SIN3B
centr_pathway_SIPA1L1
centr_pathway_SKA1
centr_pathway_SKA2
centr_pathway_SKAP1
centr_pathway_SLC16A1
centr_pathway_SLC1A5
centr_pathway_SLK
centr_pathway_SMARCA5
centr_pathway_SMC2
centr_pathway_SMC3
centr_pathway_SMC4
centr_pathway_SNAI2
centr_pathway_SND1
centr_pathway_SOCS2
centr_pathway_SOCS4
centr_pathway_SOCS5
centr_pathway_SOCS7
centr_pathway_SPC24
centr_pathway_SPC25
centr_pathway_SPDL1
centr_pathway_SPOCK1
centr_pathway_SPON1
centr_pathway_SPON2
centr_pathway_SRGAP1
centr_pathway_SRGAP2
centr_pathway_SRGAP3
centr_pathway_STAG1
centr_pathway_STAG2
centr_pathway_STARD13
centr_pathway_STARD8
centr_pathway_STK3
centr_pathway_STK4
centr_pathway_SUDS3
centr_pathway_SUN1
centr_pathway_SUN2
centr_pathway_SUV39H1
centr_pathway_SUZ12
centr_pathway_SYDE1
centr_pathway_SYDE2
centr_pathway_SYK
centr_pathway_SYNE1
centr_pathway_SYNE2
centr_pathway_TACC1
centr_pathway_TACC3
centr_pathway_TAGAP
centr_pathway_TAOK1
centr_pathway_TARBP2
centr_pathway_TAS2R13
centr_pathway_TAS2R16
centr_pathway_TAS2R19
centr_pathway_TAS2R20
centr_pathway_TAS2R38
centr_pathway_TAS2R39
centr_pathway_TAS2R40
centr_pathway_TAS2R41
centr_pathway_TAS2R46
centr_pathway_TAS2R60
centr_pathway_TAS2R7
centr_pathway_TAS2R8
centr_pathway_TAS2R9
centr_pathway_TBK1
centr_pathway_TCF7
centr_pathway_TCF7L1
centr_pathway_TCF7L2
centr_pathway_TDGF1
centr_pathway_TERF1
centr_pathway_TERF2
centr_pathway_TERF2IP
centr_pathway_TEX15
centr_pathway_TFDP1
centr_pathway_TFDP2
centr_pathway_TGFA
centr_pathway_TGFB1
centr_pathway_TGFB2
centr_pathway_TGFB3
centr_pathway_TGIF2
centr_pathway_TGM2
centr_pathway_THPO
centr_pathway_TIAM2
centr_pathway_TINF2
centr_pathway_TIRAP
centr_pathway_TLE1
centr_pathway_TLE3
centr_pathway_TLN1
centr_pathway_TLN2
centr_pathway_TLR1
centr_pathway_TLR2
centr_pathway_TLR3
centr_pathway_TLR4
centr_pathway_TLR5
centr_pathway_TLR6
centr_pathway_TNC
centr_pathway_TNF
centr_pathway_TNFRSF11B
centr_pathway_TNFRSF1A
centr_pathway_TNXB
centr_pathway_TOLLIP
centr_pathway_TOP3A
centr_pathway_TPX2
centr_pathway_TRA
centr_pathway_TRADD
centr_pathway_TRAF2
centr_pathway_TRB
centr_pathway_TRIP10
centr_pathway_TRIP6
centr_pathway_TRRAP
centr_pathway_TSHB
centr_pathway_TXK
centr_pathway_TXN
centr_pathway_TYMP
centr_pathway_UBE2E1
centr_pathway_UGDH
centr_pathway_UGP2
centr_pathway_USP8
centr_pathway_VAMP3
centr_pathway_VAV2
centr_pathway_VCAN
centr_pathway_VEGFC
centr_pathway_VIM
centr_pathway_VTN
centr_pathway_VWF
centr_pathway_WARS1
centr_pathway_WAS
centr_pathway_WASL
centr_pathway_WDR5
centr_pathway_WEE1
centr_pathway_WIPF1
centr_pathway_WNT1
centr_pathway_XPO1
centr_pathway_YEATS4
centr_pathway_ZNF350
centr_pathway_ZW10
centr_pathway_ZWILCH
centr_pathway_ZWINT
centr_pathway_ZYX

## Sheet: MGMT meth_p
centr_pathway_ACAP2
centr_pathway_ANKRA2
centr_pathway_CACNA1A
centr_pathway_CAMK2N2
centr_pathway_CYP17A1
centr_pathway_EIF2A
centr_pathway_FADD
centr_pathway_FADS6
centr_pathway_GADD45G
centr_pathway_GIT1
centr_pathway_GLS2
centr_pathway_HSD11B1
centr_pathway_KCNJ11
centr_pathway_LCP2
centr_pathway_LRP1
centr_pathway_MIRLET7A1
centr_pathway_MIRLET7A2
centr_pathway_MIRLET7A3
centr_pathway_MIRLET7B
centr_pathway_MIRLET7D
centr_pathway_MIRLET7E
centr_pathway_MIRLET7F1
centr_pathway_MIRLET7F2
centr_pathway_MIRLET7G
centr_pathway_MIRLET7I
centr_pathway_MRVI1
centr_pathway_MTAP
centr_pathway_NR3C2
centr_pathway_PDC
centr_pathway_PPIB
centr_pathway_PTPRJ
centr_pathway_RPRM
centr_pathway_RUNX1T1
centr_pathway_SCD
centr_pathway_SCD5
centr_pathway_SELL
centr_pathway_SLC22A6
centr_pathway_SLC22A8
centr_pathway_SLC29A2
centr_pathway_ST8SIA2
centr_pathway_WEE2
centr_pathway_WWOX

## Sheet: MGMT unmeth_m
centr_pathway_ABCC10
centr_pathway_ATR
centr_pathway_AURKB
centr_pathway_CDC25B
centr_pathway_CDC25C
centr_pathway_CDT1
centr_pathway_CHEK2
centr_pathway_CHRNA1
centr_pathway_CLIC1
centr_pathway_CPEB2
centr_pathway_DTYMK
centr_pathway_DUT
centr_pathway_FBLN5
centr_pathway_FUK
centr_pathway_GALNS
centr_pathway_GOLGA2
centr_pathway_GORASP1
centr_pathway_HSD3B7
centr_pathway_HUS1
centr_pathway_MCM8
centr_pathway_MFAP2
centr_pathway_MFAP5
centr_pathway_MLH3
centr_pathway_MSH2
centr_pathway_NNMT
centr_pathway_NUMA1
centr_pathway_ORC2
centr_pathway_ORC3
centr_pathway_ORC4
centr_pathway_ORC5
centr_pathway_ORC6
centr_pathway_PKMYT1
centr_pathway_PTCH1
centr_pathway_RAB1A
centr_pathway_RAD1
centr_pathway_RAD17
centr_pathway_RAD9A
centr_pathway_RPA1
centr_pathway_RPA2
centr_pathway_RPA4
centr_pathway_RPF1
centr_pathway_SLK
centr_pathway_STEAP3
centr_pathway_TGIF2
centr_pathway_WEE1
centr_pathway_ZNF350

## Sheet: MGMT unmeth_p
centr_pathway_CYP17A1
centr_pathway_gdhA
centr_pathway_IDI2
centr_pathway_MGAT4C
centr_pathway_PCYT1A
centr_pathway_PDC

## Sheet: IDH mut_m
centr_pathway_APCS
centr_pathway_ASAP3
centr_pathway_BLM
centr_pathway_BMI1
centr_pathway_BRCA1
centr_pathway_BRCA2
centr_pathway_BRD8
centr_pathway_CBX2
centr_pathway_CBX4
centr_pathway_CBX6
centr_pathway_CBX8
centr_pathway_CEBPB
centr_pathway_COL10A1
centr_pathway_COL12A1
centr_pathway_COL13A1
centr_pathway_COL14A1
centr_pathway_COL15A1
centr_pathway_COL16A1
centr_pathway_COL18A1
centr_pathway_COL19A1
centr_pathway_COL20A1
centr_pathway_COL21A1
centr_pathway_COL22A1
centr_pathway_COL23A1
centr_pathway_COL24A1
centr_pathway_COL25A1
centr_pathway_COL27A1
centr_pathway_COL4A1
centr_pathway_COL4A2
centr_pathway_COL4A3
centr_pathway_COL4A4
centr_pathway_COL4A5
centr_pathway_COL4A6
centr_pathway_COL5A3
centr_pathway_COL6A1
centr_pathway_COL6A2
centr_pathway_COL6A3
centr_pathway_COL8A1
centr_pathway_COL8A2
centr_pathway_COL9A1
centr_pathway_COL9A2
centr_pathway_COL9A3
centr_pathway_COPRS
centr_pathway_DMAP1
centr_pathway_DMC1
centr_pathway_DNMT1
centr_pathway_DNMT3A
centr_pathway_DNMT3B
centr_pathway_DOCK11
centr_pathway_EED
centr_pathway_EHMT1
centr_pathway_EHMT2
centr_pathway_ELP2
centr_pathway_ELP5
centr_pathway_EP400
centr_pathway_EPC1
centr_pathway_EVI5
centr_pathway_EZH2
centr_pathway_FBLIM1
centr_pathway_GP6
centr_pathway_GPS2
centr_pathway_HJURP
centr_pathway_HRG
centr_pathway_IL18RAP
centr_pathway_ING3
centr_pathway_ITGB3BP
centr_pathway_KANSL2
centr_pathway_KANSL3
centr_pathway_KAT5
centr_pathway_KDM6B
centr_pathway_LEF1
centr_pathway_LMNB1
centr_pathway_LOXL2
centr_pathway_MAPKAPK3
centr_pathway_MEAF6
centr_pathway_MIS18A
centr_pathway_MIS18BP1
centr_pathway_MND1
centr_pathway_MORF4L1
centr_pathway_MORF4L2
centr_pathway_MRGBP
centr_pathway_MSH4
centr_pathway_MSH5
centr_pathway_MSL1
centr_pathway_MSL3
centr_pathway_NCAPD3
centr_pathway_NCAPG2
centr_pathway_NCAPH2
centr_pathway_OGT
centr_pathway_OIP5
centr_pathway_PHC1
centr_pathway_PHC2
centr_pathway_PHC3
centr_pathway_PHF20
centr_pathway_PHF8
centr_pathway_PPP1CA
centr_pathway_PRDM9
centr_pathway_PRMT1
centr_pathway_PRMT6
centr_pathway_PSMC3IP
centr_pathway_RAD51
centr_pathway_RAD51C
centr_pathway_RING1
centr_pathway_RNF2
centr_pathway_RRP8
centr_pathway_RSF1
centr_pathway_RUVBL1
centr_pathway_SERPINB2
centr_pathway_SERPINE2
centr_pathway_SLC16A1
centr_pathway_SMARCA5
centr_pathway_SMC2
centr_pathway_SMC4
centr_pathway_SUV39H1
centr_pathway_SUZ12
centr_pathway_TCF7L2
centr_pathway_TEX15
centr_pathway_TOP3A
centr_pathway_VPS72
centr_pathway_WDR5
centr_pathway_WEE1
centr_pathway_YEATS4

## Sheet: IDH mut_p
centr_pathway_CACNA1A
centr_pathway_KCND2
centr_pathway_KCNIP2
centr_pathway_KCNJ11
centr_pathway_SLC22A6
centr_pathway_SLC22A8
centr_pathway_SPHKAP

## Sheet: IDH wt_m
centr_pathway_AHCTF1
centr_pathway_ARID4B
centr_pathway_ASH2L
centr_pathway_ATM
centr_pathway_ATR
centr_pathway_ATRIP
centr_pathway_AURKB
centr_pathway_AURKC
centr_pathway_B9D2
centr_pathway_BARD1
centr_pathway_BAZ2A
centr_pathway_BCL9
centr_pathway_BCL9L
centr_pathway_BIRC5
centr_pathway_BIRC7
centr_pathway_BLM
centr_pathway_BRCA2
centr_pathway_BUB1
centr_pathway_BUB1B
centr_pathway_BUB3
centr_pathway_CCNA1
centr_pathway_CCNA2
centr_pathway_CCNB1
centr_pathway_CDC20
centr_pathway_CDC25A
centr_pathway_CDC25B
centr_pathway_CDC26
centr_pathway_CDC45
centr_pathway_CDC6
centr_pathway_CDC7
centr_pathway_CDCA5
centr_pathway_CDCA8
centr_pathway_CDK4
centr_pathway_CDKN1C
centr_pathway_CDT1
centr_pathway_CENPA
centr_pathway_CENPC
centr_pathway_CENPE
centr_pathway_CENPF
centr_pathway_CENPH
centr_pathway_CENPI
centr_pathway_CENPK
centr_pathway_CENPL
centr_pathway_CENPM
centr_pathway_CENPN
centr_pathway_CENPO
centr_pathway_CENPP
centr_pathway_CENPQ
centr_pathway_CENPT
centr_pathway_CENPU
centr_pathway_CEP164
centr_pathway_CHEK1
centr_pathway_CHEK2
centr_pathway_CKAP5
centr_pathway_CLASP1
centr_pathway_CLASP2
centr_pathway_CLIP1
centr_pathway_CLSPN
centr_pathway_CPEB1
centr_pathway_CPEB2
centr_pathway_CPEB3
centr_pathway_CPEB4
centr_pathway_DBF4
centr_pathway_DBNL
centr_pathway_DLGAP5
centr_pathway_DMC1
centr_pathway_DNMT1
centr_pathway_DNMT3A
centr_pathway_DNMT3B
centr_pathway_DSG2
centr_pathway_DSN1
centr_pathway_DTYMK
centr_pathway_DUT
centr_pathway_E2F1
centr_pathway_E2F2
centr_pathway_E2F3
centr_pathway_E2F5
centr_pathway_ELF1
centr_pathway_ERCC6L
centr_pathway_ESPL1
centr_pathway_EVI5
centr_pathway_FANCA
centr_pathway_FANCB
centr_pathway_FANCC
centr_pathway_FANCD2
centr_pathway_FANCE
centr_pathway_FANCF
centr_pathway_FANCG
centr_pathway_FANCL
centr_pathway_FANCM
centr_pathway_FBXO5
centr_pathway_FOXM1
centr_pathway_FZR1
centr_pathway_GCKR
centr_pathway_GJD2
centr_pathway_GOLGA2
centr_pathway_GORASP1
centr_pathway_GSC
centr_pathway_H2AFX
centr_pathway_H3F3B
centr_pathway_HDAC1
centr_pathway_HES1
centr_pathway_HIST1H2AG
centr_pathway_HIST1H2BA
centr_pathway_HIST1H2BB
centr_pathway_HIST1H2BC
centr_pathway_HIST1H2BD
centr_pathway_HIST1H2BH
centr_pathway_HIST1H2BJ
centr_pathway_HIST1H2BK
centr_pathway_HIST1H2BL
centr_pathway_HIST1H2BM
centr_pathway_HIST1H2BN
centr_pathway_HIST1H2BO
centr_pathway_HIST2H2BE
centr_pathway_HIST3H2BB
centr_pathway_HIST3H3
centr_pathway_HJURP
centr_pathway_HUS1
centr_pathway_INCENP
centr_pathway_ITGB3BP
centr_pathway_KAT5
centr_pathway_KIF18A
centr_pathway_KIF2A
centr_pathway_KIF2B
centr_pathway_KIF2C
centr_pathway_KMT2D
centr_pathway_KNTC1
centr_pathway_KPNB1
centr_pathway_MAD1L1
centr_pathway_MAD2L1
centr_pathway_MAPRE1
centr_pathway_MBD2
centr_pathway_MCM2
centr_pathway_MCM3
centr_pathway_MCM4
centr_pathway_MCM5
centr_pathway_MCM6
centr_pathway_MCM7
centr_pathway_MCM8
centr_pathway_MCPH1
centr_pathway_MDC1
centr_pathway_MEN1
centr_pathway_MIS12
centr_pathway_MIS18A
centr_pathway_MIS18BP1
centr_pathway_MLH3
centr_pathway_MND1
centr_pathway_MSH3
centr_pathway_MSH4
centr_pathway_MSH5
centr_pathway_MYBL2
centr_pathway_NCAPD2
centr_pathway_NCAPD3
centr_pathway_NCAPG
centr_pathway_NCAPG2
centr_pathway_NCAPH2
centr_pathway_NCOR2
centr_pathway_NDC80
centr_pathway_NDE1
centr_pathway_NDEL1
centr_pathway_NEK6
centr_pathway_NEK7
centr_pathway_NEK9
centr_pathway_NPM1
centr_pathway_NSL1
centr_pathway_NUDC
centr_pathway_NUF2
centr_pathway_NUMA1
centr_pathway_NUTF2
centr_pathway_OIP5
centr_pathway_ONECUT1
centr_pathway_ORC1
centr_pathway_ORC2
centr_pathway_ORC3
centr_pathway_ORC4
centr_pathway_ORC5
centr_pathway_ORC6
centr_pathway_PAFAH1B1
centr_pathway_PALB2
centr_pathway_PARP6
centr_pathway_PDS5A
centr_pathway_PDS5B
centr_pathway_PHAX
centr_pathway_PKMYT1
centr_pathway_PLK1
centr_pathway_PMF1
centr_pathway_POLA1
centr_pathway_POLA2
centr_pathway_POLE2
centr_pathway_PRC1
centr_pathway_PRIM1
centr_pathway_PRIM2
centr_pathway_PSMC3IP
centr_pathway_PSMD10
centr_pathway_PSMD8
centr_pathway_PSMD9
centr_pathway_PSME1
centr_pathway_PSME2
centr_pathway_PSME3
centr_pathway_PSMF1
centr_pathway_PTCH1
centr_pathway_PYGO1
centr_pathway_PYGO2
centr_pathway_RAB1A
centr_pathway_RAD1
centr_pathway_RAD17
centr_pathway_RAD21
centr_pathway_RAD51
centr_pathway_RAD51C
centr_pathway_RAD52
centr_pathway_RAD9A
centr_pathway_RANGAP1
centr_pathway_RB1
centr_pathway_RBBP5
centr_pathway_RCC1
centr_pathway_RCC2
centr_pathway_RFC2
centr_pathway_RFC3
centr_pathway_RFC4
centr_pathway_RFC5
centr_pathway_RMI1
centr_pathway_RPA1
centr_pathway_RPA2
centr_pathway_RPA3
centr_pathway_RSF1
centr_pathway_RUVBL1
centr_pathway_SAP130
centr_pathway_SAP18
centr_pathway_SAP30
centr_pathway_SAP30BP
centr_pathway_SAP30L
centr_pathway_SEPT1
centr_pathway_SKA1
centr_pathway_SKA2
centr_pathway_SLBP
centr_pathway_SLK
centr_pathway_SMARCA5
centr_pathway_SMC2
centr_pathway_SMC3
centr_pathway_SMC4
centr_pathway_SPC24
centr_pathway_SPC25
centr_pathway_SPDL1
centr_pathway_SPDYA
centr_pathway_SPDYC
centr_pathway_STAG1
centr_pathway_STAG2
centr_pathway_SUDS3
centr_pathway_SUV39H1
centr_pathway_TACC1
centr_pathway_TAOK1
centr_pathway_TBL1X
centr_pathway_TBL1XR1
centr_pathway_TCF7
centr_pathway_TCF7L1
centr_pathway_TEX15
centr_pathway_TFDP1
centr_pathway_TGIF2
centr_pathway_TOP1
centr_pathway_TOP2A
centr_pathway_TOP3A
centr_pathway_TOPBP1
centr_pathway_TP53BP1
centr_pathway_TPX2
centr_pathway_TRRAP
centr_pathway_UBA1
centr_pathway_UBC
centr_pathway_UBE2E1
centr_pathway_UBTF
centr_pathway_WDR48
centr_pathway_XPO1
centr_pathway_ZW10
centr_pathway_ZWILCH
centr_pathway_ZWINT

## Sheet: IDH wt_p
centr_pathway_EPHX1
centr_pathway_MIR331
centr_pathway_PKIB
centr_pathway_PPP1CC
centr_pathway_WEE2
