# Supplementary material for: Next-Generation Grade and Survival Expression Biomarkers of Human Gliomas Based on Algorithmically Reconstructed Molecular Pathways
Source: Int J Mol Sci. 2022 Jun 30;23(13):7330. doi: 10.3390/ijms23137330 (PMC9266372; doi:10.3390/ijms23137330)
Supplement: Supplementary file 1 [file ijms-23-07330-s001.zip › Supplementary table S4.xlsx]

## Sheet: terms_all,unfavor.
ID

## Sheet: terms_all,favor.
ID

## Sheet: terms_IDH_mut,unfavor.
ID

## Sheet: terms_IDH_mut,favor.
ID

## Sheet: terms_IDH_wt,unfavor.
ID

## Sheet: terms_IDH_wt,favor.
ID

## Sheet: terms_MGMT_meth,unfavor.
ID

## Sheet: terms_MGMT_meth,favor.
ID

## Sheet: terms_MGMT_unmeth,unfavor.
ID

## Sheet: terms_MGMT_unmeth,favor.
ID
