# Supplementary material for: Next-Generation Grade and Survival Expression Biomarkers of Human Gliomas Based on Algorithmically Reconstructed Molecular Pathways
Source: Int J Mol Sci. 2022 Jun 30;23(13):7330. doi: 10.3390/ijms23137330 (PMC9266372; doi:10.3390/ijms23137330)
Supplement: Supplementary file 1 [file ijms-23-07330-s001.zip › Supplementary table S5,handly_direction_names.xlsx]

## Sheet: genecentr.path.LGG_vs_GBM
	p_value_TCGA	direction_TCGA	AUC_TCGA	p_value_CGGA_325	direction_CGGA_325	AUC_CGGA_325	p_value_CGGA_693	direction_CGGA_693	AUC_CGGA_693	q_TCGA	q_CGGA_325	q_CGGA_693	direction	q	auc	all
centr_pathway_A2M.xlsx	3.94817e-45	GBM	0.843005	5.86156e-12	GBM	0.714997	9.31062e-08	GBM	0.619825	2.76409e-44	2.39677e-11	2.55973e-07	1	1	0	0
centr_pathway_A4GALT.xlsx	7.00439e-35	GBM	0.848487	5.83209e-13	GBM	0.731639	1.94246e-15	GBM	0.685378	2.75528e-34	2.86072e-12	1.20313e-14	1	1	0	0
centr_pathway_AAAS.xlsx	2.47247e-46	GBM	0.884289	1.20781e-21	GBM	0.810934	9.04336e-11	GBM	0.664618	1.85435e-45	3.16668e-20	3.34133e-10	1	1	0	0
centr_pathway_AACS.xlsx	3.49523e-31	LGG	0.77317	7.62289e-15	LGG	0.740059	1.61354e-08	LGG	0.630187	1.12832e-30	5.08147e-14	4.77646e-08	1	1	0	0
centr_pathway_AADAT.xlsx	1.00262e-26	GBM	0.758568	0.00991716	LGG	0.575895	0.806756	LGG	0.50917	2.7515e-26	0.0135517	0.833398	0	0	0	0
centr_pathway_AANAT.xlsx	1.24873e-19	GBM	0.736276	0.0796617	GBM	0.560677	1.66297e-07	GBM	0.625364	2.71874e-19	0.0968268	4.47446e-07	1	0	0	0
centr_pathway_AARS.xlsx	4.57411e-41	LGG	0.894087	7.56117e-10	LGG	0.699186	0.116283	LGG	0.557689	2.4354e-40	2.37755e-09	0.145525	1	0	0	0
centr_pathway_AARS1.xlsx	2.28047e-09	LGG	0.693236	0.454527	LGG	0.504506	0.0393504	GBM	0.551887	3.32393e-09	0.492851	0.055475	0	0	0	0
centr_pathway_AARS2.xlsx	4.57411e-41	LGG	0.894087	7.56117e-10	LGG	0.699186	0.116283	LGG	0.557689	2.4354e-40	2.37755e-09	0.145525	1	0	0	0
centr_pathway_AASDHPPT.xlsx	2.36358e-56	LGG	0.914095	4.61189e-13	LGG	0.728872	5.19803e-11	LGG	0.656985	3.83825e-55	2.29546e-12	1.98153e-10	1	1	0	0
centr_pathway_AASS.xlsx	0.0524255	LGG	0.542363	0.429559	GBM	0.517076	0.000526737	LGG	0.577098	0.0576164	0.467548	0.000996331	0	0	0	0
centr_pathway_AATF.xlsx	2.58672e-40	GBM	0.833986	1.12484e-20	GBM	0.807692	1.41228e-10	GBM	0.653132	1.33353e-39	2.33303e-19	5.12899e-10	1	1	0	0
centr_pathway_AATK.xlsx	5.90155e-10	GBM	0.665952	0.0503878	GBM	0.56044	1.12864e-06	GBM	0.610532	8.77829e-10	0.0628139	2.77136e-06	1	0	0	0
centr_pathway_ABAT.xlsx	1.67407e-10	LGG	0.659755	1.39157e-15	LGG	0.750731	9.49407e-13	LGG	0.663167	2.65956e-10	1.08159e-14	4.30471e-12	1	1	0	0
centr_pathway_ABCA1.xlsx	0.00602635	GBM	0.571642	0.714706	GBM	0.51004	1.53208e-05	GBM	0.598539	0.00692673	0.743047	3.40895e-05	1	0	0	0
centr_pathway_ABCB1.xlsx	4.51908e-16	GBM	0.715678	0.000275551	GBM	0.61997	4.64338e-08	GBM	0.637031	8.57442e-16	0.000443718	1.32098e-07	1	1	0	0
centr_pathway_ABCB7.xlsx	5.18703e-20	GBM	0.756373	3.33975e-10	GBM	0.702585	0.340204	GBM	0.526041	1.14164e-19	1.09261e-09	0.386631	1	0	0	0
centr_pathway_ABCC1.xlsx	0.112157	LGG	0.536655	0.00410699	LGG	0.581587	0.50467	LGG	0.517891	0.12151	0.00587976	0.551376	1	0	0	0
centr_pathway_ABCC10.xlsx	4.84742e-28	GBM	0.782478	9.47123e-13	GBM	0.730651	1.20778e-20	GBM	0.725249	1.38101e-27	4.54399e-12	1.36241e-19	1	1	1	1
centr_pathway_ABCC2.xlsx	4.51908e-16	GBM	0.715678	0.000275551	GBM	0.61997	4.64338e-08	GBM	0.637031	8.57442e-16	0.000443718	1.32098e-07	1	1	0	0
centr_pathway_ABCC3.xlsx	0.33275	GBM	0.534673	0.191634	GBM	0.537552	0.0258439	GBM	0.571061	0.349746	0.219998	0.0376164	1	0	0	0
centr_pathway_ABCC4.xlsx	6.35012e-16	GBM	0.712253	0.00856097	GBM	0.580757	0.000185281	GBM	0.595239	1.19938e-15	0.0117654	0.000371811	1	1	0	0
centr_pathway_ABCC5.xlsx	6.75128e-05	LGG	0.602338	0.1834	GBM	0.538817	0.527431	LGG	0.502842	8.42641e-05	0.211327	0.573329	0	0	0	0
centr_pathway_ABCC8.xlsx	3.14886e-06	GBM	0.627164	0.00292362	GBM	0.58558	0.0397908	LGG	0.529948	4.10793e-06	0.00424435	0.0560852	0	0	0	0
centr_pathway_ABCC9.xlsx	2.53879e-13	LGG	0.698091	1.69887e-05	LGG	0.649458	0.102749	LGG	0.542812	4.42792e-13	3.11878e-05	0.129327	1	0	0	0
centr_pathway_ABCD1.xlsx	7.41339e-17	GBM	0.731723	0.00275749	GBM	0.598387	6.96635e-11	GBM	0.671335	1.474e-16	0.00401884	2.61545e-10	1	1	0	0
centr_pathway_ABCD2.xlsx	7.41339e-17	GBM	0.731723	0.00275749	GBM	0.598387	6.96635e-11	GBM	0.671335	1.474e-16	0.00401884	2.61545e-10	1	1	0	0
centr_pathway_ABCG2.xlsx	1.31379e-19	GBM	0.735724	0.000425766	GBM	0.616294	2.77404e-08	GBM	0.629996	2.85539e-19	0.000674809	8.04862e-08	1	1	0	0
centr_pathway_ABHD12.xlsx	9.42799e-27	LGG	0.791535	3.60515e-12	LGG	0.730769	7.91077e-14	LGG	0.681398	2.58923e-26	1.51404e-11	4.02843e-13	1	1	0	0
centr_pathway_ABHD5.xlsx	6.40243e-05	LGG	0.603668	0.214707	LGG	0.535141	0.0969247	LGG	0.540129	7.99769e-05	0.245201	0.122534	1	0	0	0
centr_pathway_ABHD6.xlsx	9.42799e-27	LGG	0.791535	3.60515e-12	LGG	0.730769	7.91077e-14	LGG	0.681398	2.58923e-26	1.51404e-11	4.02843e-13	1	1	0	0
centr_pathway_ABI1.xlsx	2.59018e-10	GBM	0.667181	0.0713495	GBM	0.577872	0.00838634	GBM	0.558024	4.09321e-10	0.0872648	0.0133354	1	0	0	0
centr_pathway_ABI2.xlsx	0.000624693	LGG	0.582581	0.0686461	LGG	0.548897	0.259268	LGG	0.539939	0.000749994	0.0840965	0.303549	1	0	0	0
centr_pathway_ABL1.xlsx	0.00179107	GBM	0.603367	0.302597	GBM	0.546881	0.345007	GBM	0.523258	0.00210598	0.337599	0.391611	1	0	0	0
centr_pathway_ABL2.xlsx	2.30211e-06	GBM	0.612299	0.00519928	GBM	0.588663	0.00269301	GBM	0.567462	3.01591e-06	0.00732685	0.00461437	1	1	0	0
centr_pathway_ABLIM1.xlsx	1.08707e-38	LGG	0.870603	4.74795e-10	LGG	0.706617	3.19437e-13	LGG	0.665325	5.05945e-38	1.52253e-09	1.50902e-12	1	1	0	0
centr_pathway_ABLIM2.xlsx	1.08707e-38	LGG	0.870603	4.74795e-10	LGG	0.706617	3.19437e-13	LGG	0.665325	5.05945e-38	1.52253e-09	1.50902e-12	1	1	0	0
centr_pathway_ABLIM3.xlsx	1.08707e-38	LGG	0.870603	4.74795e-10	LGG	0.706617	3.19437e-13	LGG	0.665325	5.05945e-38	1.52253e-09	1.50902e-12	1	1	0	0
centr_pathway_ABP1.xlsx	3.94324e-15	LGG	0.70213	3.0418e-08	LGG	0.682702	3.31011e-08	LGG	0.626606	7.28207e-15	8.17959e-08	9.52231e-08	1	1	0	0
centr_pathway_ABR.xlsx	2.57699e-48	GBM	0.854132	1.36748e-10	GBM	0.697605	6.15163e-05	GBM	0.594985	2.17025e-47	4.67841e-10	0.000129047	1	1	0	0
centr_pathway_ACAA1.xlsx	2.08053e-19	LGG	0.732061	1.6495e-17	LGG	0.768361	1.99203e-13	LGG	0.67042	4.4866e-19	1.79826e-16	9.63032e-13	1	1	0	0
centr_pathway_ACAA2.xlsx	6.11212e-21	LGG	0.741018	1.12237e-17	LGG	0.769389	1.79453e-14	LGG	0.677056	1.37688e-20	1.25672e-16	9.88916e-14	1	1	0	0
centr_pathway_ACACA.xlsx	0.407901	LGG	0.518039	2.06335e-10	LGG	0.705787	4.60568e-06	LGG	0.597841	0.425383	6.91746e-10	1.07355e-05	1	0	0	0
centr_pathway_ACACB.xlsx	7.27654e-06	GBM	0.634879	2.6102e-23	GBM	0.810973	1.84491e-25	GBM	0.750206	9.39761e-06	1.38825e-21	3.45109e-24	1	1	0	0
centr_pathway_ACAD8.xlsx	4.01046e-13	LGG	0.680666	3.73873e-13	LGG	0.739307	1.75411e-14	LGG	0.676285	6.9573e-13	1.88353e-12	9.68796e-14	1	1	0	0
centr_pathway_ACADL.xlsx	0.000207678	GBM	0.591726	0.145378	GBM	0.545774	0.0439659	GBM	0.549775	0.000253862	0.170336	0.061366	1	0	0	0
centr_pathway_ACADM.xlsx	0.430257	LGG	0.520259	8.99574e-05	LGG	0.636335	0.00692431	LGG	0.566981	0.447324	0.000151887	0.0111342	1	0	0	0
centr_pathway_ACADS.xlsx	2.97944e-05	LGG	0.619386	2.32383e-14	LGG	0.741126	1.60372e-16	LGG	0.68973	3.76525e-05	1.41776e-13	1.1117e-15	1	1	0	0
centr_pathway_ACADSB.xlsx	2.50086e-09	LGG	0.656493	1.02198e-14	LGG	0.748715	1.2368e-18	LGG	0.702186	3.64018e-09	6.7164e-14	1.13819e-17	1	1	0	0
centr_pathway_ACADVL.xlsx	0.000206098	GBM	0.588991	0.091647	GBM	0.558068	0.796119	LGG	0.501908	0.000251973	0.110618	0.823553	0	0	0	0
centr_pathway_ACAN.xlsx	6.77488e-44	GBM	0.853342	1.03353e-11	GBM	0.723022	6.57538e-26	GBM	0.74299	4.31812e-43	4.08909e-11	1.33389e-24	1	1	1	1
centr_pathway_ACAP1.xlsx	2.46056e-12	LGG	0.692835	0.756326	GBM	0.509131	0.000285836	GBM	0.590044	4.17642e-12	0.782058	0.000559424	0	0	0	0
centr_pathway_ACAP2.xlsx	1.16636e-31	LGG	0.808658	2.06562e-22	LGG	0.812238	1.85899e-09	LGG	0.651255	3.84837e-31	6.99119e-21	6.0411e-09	1	1	0	0
centr_pathway_ACAT1.xlsx	0.19861	LGG	0.533594	0.768586	LGG	0.513598	0.439612	GBM	0.525769	0.211764	0.793413	0.486462	0	0	0	0
centr_pathway_ACAT2.xlsx	5.45142e-47	LGG	0.830611	7.15895e-21	LGG	0.786663	1.02162e-17	LGG	0.692703	4.26856e-46	1.55864e-19	8.29441e-17	1	1	0	0
centr_pathway_ACD.xlsx	1.80154e-26	GBM	0.823486	5.46925e-06	GBM	0.67195	0.000882787	GBM	0.663947	4.89898e-26	1.15007e-05	0.00162682	1	1	0	0
centr_pathway_ACE.xlsx	5.5357e-22	GBM	0.786818	0.000101437	LGG	0.6376	0.0154236	LGG	0.569003	1.28621e-21	0.000170381	0.0236956	0	1	0	0
centr_pathway_ACE2.xlsx	0.00643733	LGG	0.582342	2.80069e-05	LGG	0.646731	0.0156516	LGG	0.567616	0.00739229	4.99257e-05	0.024026	1	1	0	0
centr_pathway_ACER1.xlsx	2.09833e-06	LGG	0.626537	0.00233064	LGG	0.598585	0.0375489	LGG	0.555867	2.75475e-06	0.00342017	0.0531467	1	0	0	0
centr_pathway_ACER2.xlsx	2.09833e-06	LGG	0.626537	0.00233064	LGG	0.598585	0.0375489	LGG	0.555867	2.75475e-06	0.00342017	0.0531467	1	0	0	0
centr_pathway_ACER3.xlsx	5.18807e-06	LGG	0.622598	0.165348	LGG	0.54866	0.934658	GBM	0.501573	6.72245e-06	0.192311	0.947125	0	0	0	0
centr_pathway_ACHE.xlsx	0.00750335	LGG	0.564968	0.875244	LGG	0.509171	0.0943338	LGG	0.530202	0.00857034	0.889702	0.119502	1	0	0	0
centr_pathway_ACIN1.xlsx	0.0548312	GBM	0.554782	1.71877e-05	GBM	0.637363	0.265816	GBM	0.565649	0.0601718	3.15222e-05	0.310285	1	0	0	0
centr_pathway_ACKR3.xlsx	3.80084e-08	GBM	0.640888	0.818744	LGG	0.505732	0.733317	LGG	0.520665	5.32689e-08	0.838219	0.765951	0	0	0	0
centr_pathway_ACLY.xlsx	4.66984e-09	LGG	0.655464	5.79618e-07	LGG	0.664993	0.000276382	LGG	0.586327	6.73821e-09	1.34324e-06	0.00054149	1	1	0	0
centr_pathway_ACMSD.xlsx	1.4747e-15	GBM	0.725074	0.000307226	GBM	0.631829	0.000636866	GBM	0.579709	2.75675e-15	0.000493018	0.00119372	1	1	0	0
centr_pathway_ACO1.xlsx	0.00119944	GBM	0.589806	3.82315e-05	GBM	0.638904	2.39177e-05	GBM	0.601567	0.00142219	6.72029e-05	5.2097e-05	1	1	0	0
centr_pathway_ACO2.xlsx	0.00119944	GBM	0.589806	3.82315e-05	GBM	0.638904	2.39177e-05	GBM	0.601567	0.00142219	6.72029e-05	5.2097e-05	1	1	0	0
centr_pathway_ACOT12.xlsx	1.30167e-50	GBM	0.870453	3.05769e-15	GBM	0.747016	1.69386e-11	GBM	0.656105	1.26773e-49	2.21044e-14	6.78364e-11	1	1	0	0
centr_pathway_ACOT2.xlsx	1.23396e-24	LGG	0.772141	2.22339e-13	LGG	0.742905	7.42572e-12	LGG	0.668752	3.14169e-24	1.14808e-12	3.12695e-11	1	1	0	0
centr_pathway_ACOT4.xlsx	2.90738e-10	GBM	0.665437	0.0676183	LGG	0.549846	0.343785	LGG	0.530447	4.36282e-10	0.0829057	0.390402	0	0	0	0
centr_pathway_ACOT7.xlsx	1.52926e-25	GBM	0.762519	0.237415	GBM	0.555578	0.0481918	GBM	0.551361	4.03518e-25	0.26944	0.0668383	1	0	0	0
centr_pathway_ACOT8.xlsx	0.104241	GBM	0.551897	2.25217e-05	GBM	0.645347	0.000246964	GBM	0.602382	0.113065	4.06341e-05	0.000487059	1	0	0	0
centr_pathway_ACOT9.xlsx	1.16367e-20	GBM	0.745747	0.000448491	GBM	0.632619	0.016404	GBM	0.567942	2.60258e-20	0.000710052	0.0250776	1	1	0	0
centr_pathway_ACOX1.xlsx	1.99063e-09	LGG	0.655251	1.1208e-07	LGG	0.676615	4.84798e-07	LGG	0.601222	2.91227e-09	2.86687e-07	1.24435e-06	1	1	0	0
centr_pathway_ACOX2.xlsx	0.0071824	LGG	0.561983	0.39881	LGG	0.51842	0.679528	GBM	0.508254	0.00821003	0.436248	0.715571	0	0	0	0
centr_pathway_ACOX3.xlsx	4.88253e-20	LGG	0.732463	2.47753e-11	LGG	0.712586	4.85338e-11	LGG	0.63714	1.07525e-19	9.26556e-11	1.8568e-10	1	1	0	0
centr_pathway_ACP1.xlsx	4.22183e-56	GBM	0.898904	2.49065e-15	GBM	0.761127	3.34302e-23	GBM	0.727968	6.6534e-55	1.84531e-14	4.93825e-22	1	1	1	1
centr_pathway_ACSBG1.xlsx	3.142e-21	LGG	0.749523	4.63399e-14	LGG	0.74409	1.375e-12	LGG	0.667999	7.13614e-21	2.65216e-13	6.14827e-12	1	1	0	0
centr_pathway_ACSBG2.xlsx	2.88603e-17	LGG	0.727796	7.86764e-12	LGG	0.718911	2.23004e-09	LGG	0.642199	5.79533e-17	3.14283e-11	7.18729e-09	1	1	0	0
centr_pathway_ACSF3.xlsx	4.57671e-08	LGG	0.648715	9.68467e-18	LGG	0.770575	6.11938e-17	LGG	0.689503	6.34169e-08	1.09927e-16	4.40607e-16	1	1	0	0
centr_pathway_ACSL1.xlsx	2.88603e-17	LGG	0.727796	7.86764e-12	LGG	0.718911	2.23004e-09	LGG	0.642199	5.79533e-17	3.14283e-11	7.18729e-09	1	1	0	0
centr_pathway_ACSL3.xlsx	2.88603e-17	LGG	0.727796	7.86764e-12	LGG	0.718911	2.23004e-09	LGG	0.642199	5.79533e-17	3.14283e-11	7.18729e-09	1	1	0	0
centr_pathway_ACSL4.xlsx	2.88603e-17	LGG	0.727796	7.86764e-12	LGG	0.718911	2.23004e-09	LGG	0.642199	5.79533e-17	3.14283e-11	7.18729e-09	1	1	0	0
centr_pathway_ACSL5.xlsx	2.88603e-17	LGG	0.727796	7.86764e-12	LGG	0.718911	2.23004e-09	LGG	0.642199	5.79533e-17	3.14283e-11	7.18729e-09	1	1	0	0
centr_pathway_ACSL6.xlsx	2.88603e-17	LGG	0.727796	7.86764e-12	LGG	0.718911	2.23004e-09	LGG	0.642199	5.79533e-17	3.14283e-11	7.18729e-09	1	1	0	0
centr_pathway_ACSM1.xlsx	2.1142e-09	LGG	0.661762	1.02506e-09	LGG	0.70132	0.000470996	LGG	0.583517	3.087e-09	3.18024e-09	0.000896133	1	1	0	0
centr_pathway_ACSM2A.xlsx	1.36879e-06	GBM	0.629899	3.0827e-05	GBM	0.643213	5.05237e-06	GBM	0.622599	1.80875e-06	5.46593e-05	1.17473e-05	1	1	0	0
centr_pathway_ACSM2B.xlsx	0.0149103	GBM	0.560653	0.000865025	GBM	0.617914	2.92242e-05	GBM	0.612282	0.0167792	0.00133271	6.30833e-05	1	1	0	0
centr_pathway_ACSM3.xlsx	4.23114e-06	LGG	0.627013	2.54887e-07	LGG	0.672978	0.0783418	LGG	0.548587	5.4968e-06	6.23691e-07	0.10025	1	0	0	0
centr_pathway_ACSM4.xlsx	4.23114e-06	LGG	0.627013	2.54887e-07	LGG	0.672978	0.0783418	LGG	0.548587	5.4968e-06	6.23691e-07	0.10025	1	0	0	0
centr_pathway_ACSM5.xlsx	4.23114e-06	LGG	0.627013	2.54887e-07	LGG	0.672978	0.0783418	LGG	0.548587	5.4968e-06	6.23691e-07	0.10025	1	0	0	0
centr_pathway_ACSM6.xlsx	6.67386e-11	LGG	0.675322	1.66703e-10	LGG	0.703969	0.00273683	LGG	0.571432	1.07955e-10	5.64983e-10	0.00468622	1	1	0	0
centr_pathway_ACSS1.xlsx	0.00160931	GBM	0.579545	1.19891e-05	LGG	0.636651	0.0491593	LGG	0.547953	0.00189764	2.24243e-05	0.0680661	0	0	0	0
centr_pathway_ACSS2.ACAS2.xlsx	0.00784228	GBM	0.569384	0.403705	GBM	0.531188	3.86734e-05	GBM	0.593326	0.00895063	0.441149	8.24524e-05	1	0	0	0
centr_pathway_ACSS2.xlsx	0.118417	GBM	0.539114	2.2004e-07	LGG	0.663768	0.00611127	LGG	0.565549	0.128032	5.41625e-07	0.0098931	0	0	0	0
centr_pathway_ACSS3.xlsx	3.49935e-06	LGG	0.62813	4.55989e-07	LGG	0.671239	0.000270851	LGG	0.584197	4.55641e-06	1.08963e-06	0.000531214	1	1	0	0
centr_pathway_ACTA1.xlsx	4.6817e-21	GBM	0.747629	7.55081e-18	GBM	0.784568	5.2253e-35	GBM	0.780703	1.0588e-20	8.7849e-17	6.59362e-33	1	1	1	1
centr_pathway_ACTA2.xlsx	0.317894	GBM	0.533067	6.81098e-11	GBM	0.718278	1.579e-17	GBM	0.692368	0.334932	2.42537e-10	1.21317e-16	1	0	0	0
centr_pathway_ACTB.xlsx	9.23973e-52	GBM	0.884992	1.08189e-18	GBM	0.774488	2.52069e-28	GBM	0.741367	9.72123e-51	1.50293e-17	6.92493e-27	1	1	1	1
centr_pathway_ACTC1.xlsx	0.251534	LGG	0.526444	0.00115123	GBM	0.595818	0.0519141	LGG	0.514818	0.266595	0.00175152	0.0715609	0	0	0	0
centr_pathway_ACTG1.xlsx	6.59809e-18	GBM	0.717296	9.9234e-15	GBM	0.746146	2.87139e-22	GBM	0.717833	1.34961e-17	6.53312e-14	3.87976e-21	1	1	1	1
centr_pathway_ACTG2.xlsx	0.0698659	GBM	0.553277	1.02182e-10	GBM	0.715511	1.74697e-17	GBM	0.693102	0.0763232	3.56035e-10	1.32311e-16	1	0	0	0
centr_pathway_ACTL6A.xlsx	1.23433e-23	GBM	0.80837	0.0616577	GBM	0.542889	0.401024	GBM	0.522125	3.05415e-23	0.0760734	0.448966	1	0	0	0
centr_pathway_ACTL6B.xlsx	0.418421	LGG	0.521376	0.182065	LGG	0.564076	0.0710546	LGG	0.586753	0.435806	0.209886	0.0916019	1	0	0	0
centr_pathway_ACTN1.xlsx	3.06779e-19	GBM	0.748143	1.21004e-13	GBM	0.750059	2.76512e-22	GBM	0.719882	6.58652e-19	6.57182e-13	3.74979e-21	1	1	1	1
centr_pathway_ACTN2.xlsx	5.08027e-08	LGG	0.625483	0.760801	LGG	0.51933	0.454319	GBM	0.520384	7.02511e-08	0.786358	0.501023	0	0	0	0
centr_pathway_ACTN3.xlsx	6.02507e-17	GBM	0.735912	1.98181e-13	GBM	0.753103	9.72054e-26	GBM	0.745909	1.20019e-16	1.03193e-12	1.87973e-24	1	1	1	1
centr_pathway_ACTN4.xlsx	4.42716e-22	GBM	0.769921	3.37517e-14	GBM	0.757372	1.31689e-26	GBM	0.744078	1.03217e-21	1.99774e-13	2.88457e-25	1	1	1	1
centr_pathway_ACTR1A.xlsx	3.90875e-11	GBM	0.673905	3.88859e-07	GBM	0.662463	5.24015e-08	GBM	0.633187	6.36407e-11	9.33111e-07	1.47497e-07	1	1	0	0
centr_pathway_ACTR1B.xlsx	4.77953e-25	GBM	0.732187	0.00111672	GBM	0.601905	0.0229645	GBM	0.549811	1.23242e-24	0.00170112	0.0337953	1	1	0	0
centr_pathway_ACTR2.xlsx	4.73113e-42	GBM	0.845326	1.4386e-16	GBM	0.765278	6.08683e-16	GBM	0.694879	2.61016e-41	1.31308e-15	3.98561e-15	1	1	0	0
centr_pathway_ACTR3.xlsx	4.73113e-42	GBM	0.845326	1.4386e-16	GBM	0.765278	6.08683e-16	GBM	0.694879	2.61016e-41	1.31308e-15	3.98561e-15	1	1	0	0
centr_pathway_ACVR1.xlsx	2.62156e-33	GBM	0.840735	0.000164591	GBM	0.615503	7.75666e-11	GBM	0.656966	9.34307e-33	0.000270302	2.89611e-10	1	1	0	0
centr_pathway_ACVR1B.xlsx	1.24984e-45	LGG	0.864105	0.00062283	LGG	0.614673	0.754161	GBM	0.500177	9.09974e-45	0.00097102	0.784837	0	0	0	0
centr_pathway_ACVR1C.xlsx	8.98308e-66	LGG	0.929562	4.4693e-12	LGG	0.717488	0.128773	LGG	0.552658	3.35518e-64	1.85086e-11	0.159653	1	0	0	0
centr_pathway_ACVR2A.xlsx	8.2792e-48	LGG	0.87394	6.40612e-09	LGG	0.68286	0.0314842	LGG	0.557218	6.87174e-47	1.8318e-08	0.0453034	1	1	0	0
centr_pathway_ACVR2B.xlsx	6.33738e-31	GBM	0.826233	0.000203928	GBM	0.613764	4.35773e-11	GBM	0.658589	2.01705e-30	0.000331812	1.67406e-10	1	1	0	0
centr_pathway_ACVRL1.xlsx	5.76345e-34	GBM	0.842842	2.19611e-05	GBM	0.632105	2.13708e-12	GBM	0.670991	2.11044e-33	3.96802e-05	9.44809e-12	1	1	0	0
centr_pathway_ACY1.xlsx	0.0050104	GBM	0.56621	0.00704832	LGG	0.594711	0.000561098	LGG	0.58746	0.00578481	0.0097859	0.00105783	0	1	0	0
centr_pathway_ACYP1.xlsx	0.0568517	LGG	0.558671	1.00759e-10	LGG	0.711321	2.08521e-07	LGG	0.618927	0.0623524	3.5157e-10	5.55036e-07	1	0	0	0
centr_pathway_ACYP2.xlsx	0.0065629	LGG	0.577036	2.79293e-11	LGG	0.719029	1.09854e-08	LGG	0.630613	0.00753071	1.03825e-10	3.31376e-08	1	1	0	0
centr_pathway_ADA.xlsx	3.24766e-07	GBM	0.633537	9.76859e-05	GBM	0.637205	0.0776409	GBM	0.536675	4.37275e-07	0.000164377	0.0994386	1	0	0	0
centr_pathway_ADAM10.xlsx	0.00202377	GBM	0.602163	0.00209216	GBM	0.593407	0.592997	GBM	0.514029	0.00237586	0.00308358	0.635323	1	0	0	0
centr_pathway_ADAM12.xlsx	1.92136e-27	GBM	0.780521	2.82849e-15	GBM	0.75081	6.49404e-17	GBM	0.692068	5.38556e-27	2.0648e-14	4.65782e-16	1	1	0	0
centr_pathway_ADAM15.xlsx	0.000909596	GBM	0.581289	1.00665e-08	GBM	0.701992	2.88821e-16	GBM	0.691053	0.00108282	2.81894e-08	1.96551e-15	1	1	0	0
centr_pathway_ADAM17.xlsx	0.000176986	LGG	0.610229	7.70288e-05	LGG	0.637363	0.00658898	LGG	0.564534	0.000216878	0.000130904	0.0106248	1	1	0	0
centr_pathway_ADAM2.xlsx	2.42552e-20	GBM	0.748306	1.16492e-07	GBM	0.67365	1.635e-12	GBM	0.66566	5.37645e-20	2.97564e-07	7.25854e-12	1	1	0	0
centr_pathway_ADAM20.xlsx	1.66642e-19	GBM	0.741407	0.00791956	GBM	0.599573	0.00995894	GBM	0.566891	3.60398e-19	0.0109222	0.0156786	1	1	0	0
centr_pathway_ADAM21.xlsx	1.66642e-19	GBM	0.741407	0.00791956	GBM	0.599573	0.00995894	GBM	0.566891	3.60398e-19	0.0109222	0.0156786	1	1	0	0
centr_pathway_ADAM30.xlsx	1.66642e-19	GBM	0.741407	0.00791956	GBM	0.599573	0.00995894	GBM	0.566891	3.60398e-19	0.0109222	0.0156786	1	1	0	0
centr_pathway_ADAM8.xlsx	9.94513e-16	GBM	0.728913	8.127e-16	GBM	0.776425	7.54166e-14	GBM	0.671907	1.8694e-15	6.59909e-15	3.86958e-13	1	1	0	0
centr_pathway_ADAMTS1.xlsx	5.77493e-25	GBM	0.78589	2.10416e-11	GBM	0.717922	3.91883e-16	GBM	0.68614	1.48549e-24	7.94097e-11	2.63081e-15	1	1	0	0
centr_pathway_ADAMTS10.xlsx	0.141033	GBM	0.534523	0.000573048	GBM	0.600957	0.286292	GBM	0.528298	0.151782	0.000897543	0.332362	1	0	0	0
centr_pathway_ADAMTS12.xlsx	1.01813e-06	GBM	0.616087	0.00124565	GBM	0.574709	1.72041e-05	GBM	0.586173	1.3504e-06	0.00187983	3.8075e-05	1	1	0	0
centr_pathway_ADAMTS13.xlsx	3.33648e-14	LGG	0.705969	0.684053	LGG	0.56123	0.00432659	LGG	0.573227	6.01726e-14	0.714069	0.00719971	1	0	0	0
centr_pathway_ADAMTS14.xlsx	1.84237e-22	GBM	0.758179	1.0141e-12	GBM	0.724563	1.07708e-15	GBM	0.677101	4.36628e-22	4.84658e-12	6.92477e-15	1	1	0	0
centr_pathway_ADAMTS15.xlsx	3.51751e-09	GBM	0.644588	2.83626e-05	GBM	0.655072	3.83406e-08	GBM	0.630404	5.09024e-09	5.05113e-05	1.09914e-07	1	1	0	0
centr_pathway_ADAMTS16.xlsx	0.31768	LGG	0.532503	0.00582987	GBM	0.593446	9.54911e-05	GBM	0.585665	0.334754	0.00816422	0.000196607	0	0	0	0
centr_pathway_ADAMTS17.xlsx	1.05247e-06	LGG	0.653884	0.161266	GBM	0.526168	0.481297	GBM	0.517392	1.39495e-06	0.187916	0.528504	0	0	0	0
centr_pathway_ADAMTS18.xlsx	1.3098e-47	GBM	0.819058	8.90453e-05	GBM	0.62586	1.20487e-06	GBM	0.614122	1.06698e-46	0.000150381	2.95268e-06	1	1	0	0
centr_pathway_ADAMTS19.xlsx	7.20393e-18	LGG	0.737455	0.858462	LGG	0.520278	0.982324	LGG	0.514972	1.47111e-17	0.873955	0.988031	1	0	0	0
centr_pathway_ADAMTS2.xlsx	2.41227e-22	GBM	0.776042	9.33337e-07	GBM	0.631038	7.7123e-06	GBM	0.608756	5.70241e-22	2.12138e-06	1.76725e-05	1	1	0	0
centr_pathway_ADAMTS20.xlsx	4.17213e-37	LGG	0.779705	0.772029	LGG	0.509329	0.30325	GBM	0.526186	1.81725e-36	0.796305	0.350683	0	0	0	0
centr_pathway_ADAMTS3.xlsx	1.62231e-34	GBM	0.833108	0.000107833	GBM	0.636809	1.77945e-11	GBM	0.649406	6.24994e-34	0.000180351	7.11491e-11	1	1	0	0
centr_pathway_ADAMTS4.xlsx	1.53873e-11	GBM	0.666416	3.928e-06	GBM	0.648707	4.42603e-09	GBM	0.636116	2.54919e-11	8.40941e-06	1.38279e-08	1	1	0	0
centr_pathway_ADAMTS5.xlsx	0.0251464	LGG	0.567527	0.52023	GBM	0.515377	0.0512239	GBM	0.535088	0.0280698	0.558563	0.070688	0	0	0	0
centr_pathway_ADAMTS6.xlsx	0.0130574	LGG	0.572382	0.402719	LGG	0.534509	0.436867	GBM	0.509061	0.0147206	0.440136	0.483855	0	0	0	0
centr_pathway_ADAMTS7.xlsx	7.649e-37	GBM	0.837511	2.43427e-16	GBM	0.766543	4.633e-13	GBM	0.67857	3.27814e-36	2.12992e-15	2.1643e-12	1	1	0	0
centr_pathway_ADAMTS8.xlsx	6.92261e-12	LGG	0.681795	0.15062	LGG	0.552929	0.62445	LGG	0.503468	1.1592e-11	0.176146	0.663199	1	0	0	0
centr_pathway_ADAMTS9.xlsx	2.86535e-15	GBM	0.704978	0.000269317	GBM	0.616887	1.51678e-05	GBM	0.598602	5.31517e-15	0.000434336	3.37592e-05	1	1	0	0
centr_pathway_ADAMTSL1.xlsx	0.0645913	GBM	0.552587	0.00224394	GBM	0.57973	4.33285e-06	GBM	0.595293	0.0706541	0.00329749	1.01249e-05	1	0	0	0
centr_pathway_ADAMTSL2.xlsx	9.92283e-09	LGG	0.655163	0.574896	GBM	0.508064	0.434283	LGG	0.516033	1.41511e-08	0.610099	0.481209	0	0	0	0
centr_pathway_ADAMTSL3.xlsx	1.30918e-10	LGG	0.677643	0.691181	GBM	0.512926	0.0472527	GBM	0.546937	2.09368e-10	0.721106	0.0656336	0	0	0	0
centr_pathway_ADAMTSL4.xlsx	9.69057e-37	GBM	0.834287	2.30403e-11	GBM	0.708989	1.94598e-17	GBM	0.698922	4.13649e-36	8.65143e-11	1.47085e-16	1	1	0	0
centr_pathway_ADAMTSL5.xlsx	0.245307	LGG	0.54427	0.0371522	GBM	0.555696	0.0183242	GBM	0.545831	0.260179	0.047135	0.0276666	0	0	0	0
centr_pathway_ADAP1.xlsx	3.27259e-10	LGG	0.672011	8.57317e-06	LGG	0.643648	0.0409287	LGG	0.559974	4.90298e-10	1.74893e-05	0.0574282	1	0	0	0
centr_pathway_ADCY1.xlsx	1.02676e-12	LGG	0.68453	5.29205e-16	LGG	0.774725	2.77404e-16	LGG	0.693029	1.76319e-12	4.42252e-15	1.89301e-15	1	1	0	0
centr_pathway_ADCY10.xlsx	7.92365e-05	GBM	0.625583	0.0855972	GBM	0.558226	1.2406e-06	GBM	0.603697	9.86166e-05	0.103635	3.03726e-06	1	0	0	0
centr_pathway_ADCY2.xlsx	4.56036e-23	LGG	0.760976	1.68568e-19	LGG	0.801605	2.33779e-19	LGG	0.724324	1.10139e-22	2.72861e-18	2.34884e-18	1	1	1	1
centr_pathway_ADCY3.xlsx	6.70914e-18	LGG	0.735536	4.54968e-18	LGG	0.796268	9.88357e-21	LGG	0.717688	1.37195e-17	5.61807e-17	1.12685e-19	1	1	1	1
centr_pathway_ADCY4.xlsx	2.60228e-07	LGG	0.629786	1.10902e-11	LGG	0.735355	1.27929e-10	LGG	0.642162	3.51837e-07	4.35077e-11	4.65735e-10	1	1	0	0
centr_pathway_ADCY5.xlsx	9.26855e-13	LGG	0.687064	5.98778e-14	LGG	0.757926	1.9027e-13	LGG	0.661128	1.59383e-12	3.38021e-13	9.24649e-13	1	1	0	0
centr_pathway_ADCY6.xlsx	2.60228e-07	LGG	0.629786	1.10902e-11	LGG	0.735355	1.27929e-10	LGG	0.642162	3.51837e-07	4.35077e-11	4.65735e-10	1	1	0	0
centr_pathway_ADCY7.xlsx	2.60228e-07	LGG	0.629786	1.10902e-11	LGG	0.735355	1.27929e-10	LGG	0.642162	3.51837e-07	4.35077e-11	4.65735e-10	1	1	0	0
centr_pathway_ADCY8.xlsx	2.60228e-07	LGG	0.629786	1.10902e-11	LGG	0.735355	1.27929e-10	LGG	0.642162	3.51837e-07	4.35077e-11	4.65735e-10	1	1	0	0
centr_pathway_ADCY9.xlsx	1.04477e-07	LGG	0.634778	8.11079e-12	LGG	0.736778	9.49832e-11	LGG	0.644238	1.42625e-07	3.23823e-11	3.49383e-10	1	1	0	0
centr_pathway_ADCYAP1.xlsx	0.263069	GBM	0.531361	6.93232e-07	LGG	0.659222	9.05225e-06	LGG	0.607931	0.278425	1.59364e-06	2.05909e-05	0	0	0	0
centr_pathway_ADCYAP1R1.xlsx	0.414533	LGG	0.514326	3.56723e-07	LGG	0.663926	1.2324e-06	LGG	0.618918	0.431998	8.60156e-07	3.01816e-06	1	0	0	0
centr_pathway_ADD1.xlsx	1.75851e-15	LGG	0.697275	4.2487e-08	LGG	0.661673	0.0155865	LGG	0.563364	3.27828e-15	1.12343e-07	0.0239359	1	1	0	0
centr_pathway_ADD2.xlsx	0.000362601	GBM	0.583434	0.564957	GBM	0.512333	0.00846706	GBM	0.558432	0.000439072	0.600695	0.013458	1	0	0	0
centr_pathway_ADD3.xlsx	2.78354e-09	GBM	0.660432	0.000385489	GBM	0.635109	1.29321e-07	GBM	0.625763	4.04141e-09	0.000613192	3.51899e-07	1	1	0	0
centr_pathway_ADGRA2.xlsx	5.27602e-36	GBM	0.83085	0.999166	LGG	0.534351	0.00107648	GBM	0.571713	2.19077e-35	0.999166	0.00196335	0	0	0	0
centr_pathway_ADGRB1.xlsx	1.8254e-08	LGG	0.658174	6.87969e-07	GBM	0.663135	0.159259	GBM	0.537273	2.58301e-08	1.58203e-06	0.19412	0	0	0	0
centr_pathway_ADH1A.xlsx	3.80611e-08	GBM	0.642142	0.520741	LGG	0.511977	0.0353364	GBM	0.544789	5.33327e-08	0.55895	0.0502636	0	0	0	0
centr_pathway_ADH1B.xlsx	5.53216e-07	GBM	0.637927	0.869276	LGG	0.501265	0.138904	GBM	0.533402	7.40463e-07	0.884239	0.171442	0	0	0	0
centr_pathway_ADH1C.xlsx	4.80048e-14	LGG	0.688632	0.785658	GBM	0.501028	0.0190166	LGG	0.551171	8.63047e-14	0.808229	0.028677	0	0	0	0
centr_pathway_ADH4.xlsx	2.2079e-37	LGG	0.819873	0.225777	GBM	0.550676	0.456642	GBM	0.518526	9.6956e-37	0.256975	0.503435	0	0	0	0
centr_pathway_ADH5.xlsx	2.57634e-16	GBM	0.707323	0.934457	LGG	0.508499	0.00340223	GBM	0.564008	4.92836e-16	0.942175	0.00576459	0	0	0	0
centr_pathway_ADH6.xlsx	2.97844e-11	GBM	0.67743	0.500344	LGG	0.513479	0.0353364	GBM	0.544789	4.88452e-11	0.538999	0.0502636	0	0	0	0
centr_pathway_ADH7.xlsx	7.47462e-16	GBM	0.707411	0.852027	LGG	0.502727	0.0197997	GBM	0.550999	1.40963e-15	0.868235	0.0295349	0	0	0	0
centr_pathway_ADI1.xlsx	9.98695e-21	GBM	0.746964	0.00596562	GBM	0.595344	5.52349e-08	GBM	0.636777	2.23897e-20	0.00834335	1.54828e-07	1	1	0	0
centr_pathway_ADK.xlsx	3.24868e-12	LGG	0.652642	3.14006e-07	LGG	0.669737	0.000270689	LGG	0.595755	5.49041e-12	7.61097e-07	0.000531036	1	1	0	0
centr_pathway_ADM.xlsx	2.00905e-31	GBM	0.80083	2.63878e-05	GBM	0.636651	0.00649657	GBM	0.592447	6.55926e-31	4.71749e-05	0.0104827	1	1	0	0
centr_pathway_ADM2.xlsx	1.71263e-17	GBM	0.722088	0.305721	GBM	0.534232	0.919215	LGG	0.522941	3.46892e-17	0.340727	0.933637	0	0	0	0
centr_pathway_ADO.xlsx	5.87873e-21	LGG	0.739187	6.66313e-09	LGG	0.689027	1.17179e-10	LGG	0.649424	1.32511e-20	1.89872e-08	4.28698e-10	1	1	0	0
centr_pathway_ADORA1.xlsx	0.0445939	GBM	0.544659	0.0336879	LGG	0.573642	0.111877	LGG	0.529332	0.0491757	0.0429153	0.140341	0	0	0	0
centr_pathway_ADORA2A.xlsx	0.000856637	LGG	0.584237	9.50046e-06	LGG	0.645822	9.42491e-05	LGG	0.596608	0.00102124	1.92701e-05	0.000194211	1	1	0	0
centr_pathway_ADORA2B.xlsx	5.23862e-06	GBM	0.628581	0.888391	GBM	0.513519	0.447985	LGG	0.502815	6.78676e-06	0.901812	0.494991	0	0	0	0
centr_pathway_ADORA3.xlsx	3.8161e-05	LGG	0.600846	0.701775	GBM	0.521148	0.396143	GBM	0.508961	4.80956e-05	0.730929	0.443902	0	0	0	0
centr_pathway_ADPGK.xlsx	4.38998e-90	GBM	0.965026	1.48647e-28	GBM	0.841331	2.69247e-37	GBM	0.788699	2.18621e-87	7.37882e-26	5.89572e-35	1	1	1	1
centr_pathway_ADPRM.xlsx	7.95223e-28	GBM	0.780232	0.172595	LGG	0.53107	0.000705138	GBM	0.572974	2.25268e-27	0.199835	0.00131375	0	0	0	0
centr_pathway_ADRA1A.xlsx	0.0532675	GBM	0.562986	0.0641197	LGG	0.542691	0.118112	LGG	0.529296	0.0585159	0.0788989	0.147689	0	0	0	0
centr_pathway_ADRA1B.xlsx	0.278177	GBM	0.516295	0.496717	LGG	0.512017	0.710382	LGG	0.509804	0.293915	0.535402	0.744691	0	0	0	0
centr_pathway_ADRA1D.xlsx	4.21592e-18	GBM	0.719191	0.161673	GBM	0.556961	0.615264	GBM	0.536285	8.71415e-18	0.188332	0.654147	1	0	0	0
centr_pathway_ADRA2A.xlsx	0.655546	GBM	0.517562	0.0866087	LGG	0.548344	0.0439222	LGG	0.538452	0.670537	0.104792	0.0613165	0	0	0	0
centr_pathway_ADRA2B.xlsx	0.0118673	GBM	0.571491	0.37724	LGG	0.521504	0.135358	LGG	0.519215	0.0134012	0.413809	0.167371	0	0	0	0
centr_pathway_ADRA2C.xlsx	0.811868	LGG	0.501192	0.163329	LGG	0.540873	0.0334409	LGG	0.54148	0.818662	0.190112	0.0479152	1	0	0	0
centr_pathway_ADRB1.xlsx	0.04049	GBM	0.560352	0.304677	LGG	0.529647	0.165747	LGG	0.518254	0.0447493	0.339614	0.201105	0	0	0	0
centr_pathway_ADRB2.xlsx	0.000139641	LGG	0.613904	0.000347628	LGG	0.61993	0.00335245	LGG	0.573554	0.000171961	0.000555238	0.00568413	1	1	0	0
centr_pathway_ADRB3.xlsx	4.49416e-05	GBM	0.61477	0.552115	LGG	0.516681	0.239463	LGG	0.509134	5.64985e-05	0.588133	0.282357	0	0	0	0
centr_pathway_ADSL.xlsx	6.19393e-05	LGG	0.573674	1.55752e-05	LGG	0.63922	0.00151367	LGG	0.586092	7.745e-05	2.8756e-05	0.00269599	1	1	0	0
centr_pathway_ADSS.xlsx	1.75623e-12	GBM	0.68019	0.0375788	GBM	0.581864	0.000320246	GBM	0.585829	2.99726e-12	0.0476032	0.000623002	1	1	0	0
centr_pathway_ADSS1.xlsx	#NUM!	GBM	0.5	#NUM!	GBM	0.5	#NUM!	GBM	0.5	#NUM!	#NUM!	#NUM!	1	0	0	0
centr_pathway_ADSS2.xlsx	#NUM!	GBM	0.5	#NUM!	GBM	0.5	#NUM!	GBM	0.5	#NUM!	#NUM!	#NUM!	1	0	0	0
centr_pathway_ADSSL1.xlsx	1.75623e-12	GBM	0.68019	0.0375788	GBM	0.581864	0.000320246	GBM	0.585829	2.99726e-12	0.0476032	0.000623002	1	1	0	0
centr_pathway_AES.xlsx	1.31059e-33	GBM	0.808621	4.02691e-13	GBM	0.73571	5.03145e-11	GBM	0.663149	4.74099e-33	2.02051e-12	1.92197e-10	1	1	0	0
centr_pathway_AFMID.xlsx	2.7182e-45	GBM	0.874504	0.000108796	GBM	0.616175	0.00206767	GBM	0.560753	1.91556e-44	0.00018184	0.00364005	1	1	0	0
centr_pathway_AGA.xlsx	1.7963e-21	GBM	0.772116	0.0727225	GBM	0.554787	1.67689e-06	GBM	0.608085	4.10221e-21	0.0887983	4.05734e-06	1	0	0	0
centr_pathway_AGAP2.xlsx	1.24311e-15	LGG	0.711827	5.98643e-08	LGG	0.666298	0.18635	LGG	0.537382	2.33143e-15	1.56513e-07	0.223843	1	0	0	0
centr_pathway_AGER.xlsx	4.32318e-54	GBM	0.917005	2.98541e-10	GBM	0.700846	8.96318e-13	GBM	0.65819	5.63598e-53	9.85344e-10	4.07392e-12	1	1	0	0
centr_pathway_AGK.xlsx	8.63267e-06	GBM	0.624103	0.834412	LGG	0.512452	0.8776	LGG	0.511871	1.11106e-05	0.852267	0.898354	0	0	0	0
centr_pathway_AGL.xlsx	3.57514e-07	GBM	0.629986	1.33908e-06	GBM	0.672346	4.88565e-09	GBM	0.641102	4.80674e-07	3.00507e-06	1.51368e-08	1	1	0	0
centr_pathway_AGMAT.xlsx	4.3271e-29	GBM	0.799476	1.41379e-12	GBM	0.733141	0.00083764	GBM	0.589446	1.27862e-28	6.33397e-12	0.00155053	1	1	0	0
centr_pathway_AGO1.xlsx	0.263245	LGG	0.535539	0.422147	LGG	0.502332	0.329171	GBM	0.558387	0.278572	0.459817	0.374893	0	0	0	0
centr_pathway_AGO2.xlsx	0.426744	LGG	0.5282	0.149738	LGG	0.554471	0.194797	GBM	0.522152	0.443918	0.175224	0.233161	0	0	0	0
centr_pathway_AGO3.xlsx	0.00829145	LGG	0.519595	0.23954	GBM	0.577911	0.00199884	GBM	0.593145	0.00945173	0.271602	0.00352639	0	0	0	0
centr_pathway_AGO4.xlsx	0.00638537	LGG	0.517813	0.500018	GBM	0.564432	0.0109337	GBM	0.581595	0.00733487	0.538726	0.0171155	0	0	0	0
centr_pathway_AGPAT1.xlsx	6.8309e-45	LGG	0.851234	4.10966e-09	LGG	0.695747	0.000986601	LGG	0.579945	4.72471e-44	1.2038e-08	0.00180917	1	1	0	0
centr_pathway_AGPAT2.xlsx	2.81539e-44	LGG	0.847421	5.09713e-09	LGG	0.693138	0.00358735	LGG	0.575041	1.84969e-43	1.47563e-08	0.00605208	1	1	0	0
centr_pathway_AGPAT3.xlsx	2.81539e-44	LGG	0.847421	5.09713e-09	LGG	0.693138	0.00358735	LGG	0.575041	1.84969e-43	1.47563e-08	0.00605208	1	1	0	0
centr_pathway_AGPAT4.xlsx	2.81539e-44	LGG	0.847421	5.09713e-09	LGG	0.693138	0.00358735	LGG	0.575041	1.84969e-43	1.47563e-08	0.00605208	1	1	0	0
centr_pathway_AGPAT5.xlsx	2.81539e-44	LGG	0.847421	5.09713e-09	LGG	0.693138	0.00358735	LGG	0.575041	1.84969e-43	1.47563e-08	0.00605208	1	1	0	0
centr_pathway_AGPS.xlsx	0.246885	LGG	0.535413	0.832853	LGG	0.506285	0.542456	LGG	0.509016	0.261704	0.850909	0.588458	1	0	0	0
centr_pathway_AGRN.xlsx	3.30224e-13	GBM	0.700587	2.9384e-09	GBM	0.705629	3.99066e-18	GBM	0.704434	5.73936e-13	8.73077e-09	3.43871e-17	1	1	1	1
centr_pathway_AGRP.xlsx	0.0396326	GBM	0.561543	0.00846073	LGG	0.586291	0.413744	GBM	0.524318	0.0438146	0.0116427	0.459819	0	0	0	0
centr_pathway_AGT.xlsx	0.0432501	LGG	0.560151	0.0188357	LGG	0.567752	0.128276	LGG	0.537192	0.0477362	0.0250002	0.159107	1	0	0	0
centr_pathway_AGTR1.xlsx	4.00337e-27	GBM	0.768415	0.065369	GBM	0.570598	0.189918	GBM	0.556229	1.11172e-26	0.0802933	0.227761	1	0	0	0
centr_pathway_AGTR2.xlsx	0.02295	LGG	0.573285	0.000291957	LGG	0.611234	0.00994219	LGG	0.562167	0.0256641	0.000469325	0.0156786	1	1	0	0
centr_pathway_AGXT.xlsx	2.25185e-12	GBM	0.69636	0.110715	LGG	0.555538	0.559724	LGG	0.500512	3.82563e-12	0.131901	0.604021	0	0	0	0
centr_pathway_AGXT2.xlsx	1.4573e-17	GBM	0.734344	0.0267314	GBM	0.56961	6.27884e-06	GBM	0.623161	2.95655e-17	0.0349253	1.44501e-05	1	1	0	0
centr_pathway_AHCTF1.xlsx	3.02808e-54	GBM	0.868847	1.37216e-12	GBM	0.73239	1.10602e-17	GBM	0.708504	4.0035e-53	6.15119e-12	8.64045e-17	1	1	1	1
centr_pathway_AHCY.xlsx	0.253288	LGG	0.525741	0.0413801	GBM	0.560795	0.250364	GBM	0.52392	0.268378	0.0521259	0.294093	0	0	0	0
centr_pathway_AHCYL1.xlsx	2.20476e-09	LGG	0.670919	0.0199883	LGG	0.589217	0.0563068	LGG	0.557589	3.21608e-09	0.0264686	0.0741972	1	0	0	0
centr_pathway_AHCYL2.xlsx	8.02365e-08	LGG	0.652981	0.203416	LGG	0.538778	0.467447	LGG	0.530365	1.10056e-07	0.232734	0.514358	1	0	0	0
centr_pathway_AHR.xlsx	1.21271e-13	GBM	0.731735	0.0197664	GBM	0.595027	0.351154	GBM	0.519414	2.14007e-13	0.026198	0.397981	1	0	0	0
centr_pathway_AHRR.xlsx	5.08584e-18	LGG	0.745772	4.2052e-06	LGG	0.653886	2.66051e-13	LGG	0.664473	1.04774e-17	8.97961e-06	1.26971e-12	1	1	0	0
centr_pathway_AHSG.xlsx	8.07978e-64	LGG	0.895604	7.32431e-25	LGG	0.812199	1.09463e-21	LGG	0.717769	2.65885e-62	6.65083e-23	1.39308e-20	1	1	1	1
centr_pathway_AIFM1.xlsx	2.11041e-61	GBM	0.955492	1.41572e-21	GBM	0.82884	6.56718e-24	GBM	0.737224	5.59035e-60	3.68583e-20	1.0492e-22	1	1	1	1
centr_pathway_AIFM2.xlsx	1.13668e-09	GBM	0.664333	4.01272e-09	GBM	0.688632	0.993103	GBM	0.515779	1.67673e-09	1.17725e-08	0.99577	1	0	0	0
centr_pathway_AIP.xlsx	1.59408e-15	GBM	0.724522	0.00049022	GBM	0.609534	0.0082354	GBM	0.56069	2.97619e-15	0.000773506	0.0131122	1	1	0	0
centr_pathway_AJUBA.xlsx	0.291133	LGG	0.50286	6.10755e-06	GBM	0.644913	3.82596e-08	GBM	0.635291	0.307344	1.2735e-05	1.09724e-07	0	0	0	0
centr_pathway_AK1.xlsx	0.325863	GBM	0.543191	0.0888381	LGG	0.540833	0.0506207	LGG	0.553428	0.3427	0.10735	0.0699075	0	0	0	0
centr_pathway_AK2.xlsx	0.325863	GBM	0.543191	0.0888381	LGG	0.540833	0.0506207	LGG	0.553428	0.3427	0.10735	0.0699075	0	0	0	0
centr_pathway_AK3.xlsx	0.531199	GBM	0.533118	0.0519519	LGG	0.552613	0.0310159	LGG	0.557716	0.547318	0.0646447	0.04469	0	0	0	0
centr_pathway_AK4.xlsx	0.325863	GBM	0.543191	0.0888381	LGG	0.540833	0.0506207	LGG	0.553428	0.3427	0.10735	0.0699075	0	0	0	0
centr_pathway_AK5.xlsx	0.325863	GBM	0.543191	0.0888381	LGG	0.540833	0.0506207	LGG	0.553428	0.3427	0.10735	0.0699075	0	0	0	0
centr_pathway_AK6.xlsx	1.81161e-11	GBM	0.645253	0.000360375	GBM	0.608151	0.00375279	GBM	0.570281	2.9933e-11	0.000574964	0.00630974	1	1	0	0
centr_pathway_AK7.xlsx	3.4944e-07	GBM	0.628707	2.68797e-09	GBM	0.702269	0.20847	GBM	0.530964	4.69904e-07	8.01869e-09	0.248529	1	0	0	0
centr_pathway_AK8.xlsx	0.325863	GBM	0.543191	0.0888381	LGG	0.540833	0.0506207	LGG	0.553428	0.3427	0.10735	0.0699075	0	0	0	0
centr_pathway_AK9.xlsx	0.0519377	LGG	0.533293	0.556193	LGG	0.50751	0.000233449	LGG	0.580135	0.0570887	0.592138	0.000461881	1	0	0	0
centr_pathway_AKAP1.xlsx	1.75845e-12	LGG	0.643811	0.00999059	LGG	0.569926	0.000420022	LGG	0.583372	3.00037e-12	0.0136495	0.000803253	1	1	0	0
centr_pathway_AKAP10.xlsx	1.7698e-07	LGG	0.599315	0.000905809	LGG	0.604593	0.00245949	LGG	0.574596	2.40239e-07	0.00139324	0.00423276	1	1	0	0
centr_pathway_AKAP11.xlsx	1.92005e-24	LGG	0.732864	1.36742e-08	LGG	0.696972	1.63057e-06	LGG	0.618909	4.86692e-24	3.78647e-08	3.94782e-06	1	1	0	0
centr_pathway_AKAP12.xlsx	0.904058	LGG	0.534334	0.849972	LGG	0.518262	0.448348	GBM	0.51431	0.906851	0.866378	0.495318	0	0	0	0
centr_pathway_AKAP13.xlsx	3.65207e-27	GBM	0.769457	0.0040267	GBM	0.596806	0.0356622	GBM	0.548569	1.01605e-26	0.00577147	0.0506882	1	0	0	0
centr_pathway_AKAP2.xlsx	0.000752742	LGG	0.567615	0.401276	LGG	0.500632	0.83053	LGG	0.509496	0.000899822	0.43871	0.855701	1	0	0	0
centr_pathway_AKAP3.xlsx	2.37988e-18	LGG	0.714875	1.14618e-07	LGG	0.671911	2.6232e-05	LGG	0.603915	4.96862e-18	2.92979e-07	5.68882e-05	1	1	0	0
centr_pathway_AKAP4.xlsx	0.000448685	LGG	0.558621	0.000960952	LGG	0.604356	0.00109368	LGG	0.579492	0.000541205	0.00147501	0.00199325	1	1	0	0
centr_pathway_AKAP5.xlsx	5.71127e-32	LGG	0.781913	6.80221e-09	LGG	0.684639	3.81188e-07	LGG	0.633441	1.92784e-31	1.93466e-08	9.89175e-07	1	1	0	0
centr_pathway_AKAP6.xlsx	3.54734e-32	LGG	0.791184	3.42566e-12	LGG	0.729741	5.51885e-06	LGG	0.6125	1.20998e-31	1.44191e-11	1.2796e-05	1	1	0	0
centr_pathway_AKAP7.xlsx	1.08553e-13	LGG	0.663618	6.61259e-06	LGG	0.657088	3.27162e-06	LGG	0.614467	1.92017e-13	1.3719e-05	7.71285e-06	1	1	0	0
centr_pathway_AKAP8.xlsx	0.212025	GBM	0.543178	0.00334668	LGG	0.579848	0.0158568	LGG	0.555187	0.225777	0.00484153	0.0243309	0	0	0	0
centr_pathway_AKAP9.xlsx	1.55691e-24	LGG	0.759873	0.00106055	LGG	0.600087	0.000432782	LGG	0.588684	3.95718e-24	0.00161954	0.000826806	1	1	0	0
centr_pathway_AKR1A1.xlsx	5.89717e-14	GBM	0.69656	0.626391	GBM	0.521859	0.230677	GBM	0.521934	1.05337e-13	0.661294	0.273122	1	0	0	0
centr_pathway_AKR1B1.xlsx	3.13441e-11	GBM	0.669489	0.792165	LGG	0.507787	0.875435	GBM	0.502924	5.13241e-11	0.814254	0.896384	0	0	0	0
centr_pathway_AKR1B10.xlsx	0.159506	GBM	0.521878	0.146034	LGG	0.553048	0.0846266	LGG	0.539177	0.171096	0.171077	0.107977	0	0	0	0
centr_pathway_AKR1C1.xlsx	3.02361e-33	LGG	0.842855	4.92429e-19	LGG	0.787533	3.45057e-19	LGG	0.69652	1.07575e-32	7.33326e-18	3.34935e-18	1	1	0	0
centr_pathway_AKR1C2.xlsx	2.33057e-31	LGG	0.833797	4.92429e-19	LGG	0.787533	3.45057e-19	LGG	0.69652	7.59239e-31	7.33326e-18	3.34935e-18	1	1	0	0
centr_pathway_AKR1C3.xlsx	0.00101084	LGG	0.597095	1.8226e-05	LGG	0.649893	0.0043974	LGG	0.563418	0.00120124	3.33441e-05	0.00731426	1	1	0	0
centr_pathway_AKR1C4.xlsx	2.68822e-22	LGG	0.772417	3.05624e-12	LGG	0.729346	1.77556e-10	LGG	0.642824	6.34471e-22	1.29521e-11	6.38599e-10	1	1	0	0
centr_pathway_AKR1D1.SRD5B1.xlsx	#NUM!	GBM	0.5	#NUM!	GBM	0.5	#NUM!	GBM	0.5	#NUM!	#NUM!	#NUM!	1	0	0	0
centr_pathway_AKR1D1.xlsx	0.0081243	GBM	0.582844	1.47277e-10	GBM	0.720531	2.97169e-18	GBM	0.700926	0.00926826	5.02579e-10	2.60285e-17	1	1	0	0
centr_pathway_AKT1.xlsx	0.32902	LGG	0.520422	0.249017	GBM	0.536367	8.80572e-08	GBM	0.626415	0.345874	0.281448	2.4272e-07	0	0	0	0
centr_pathway_AKT1S1.xlsx	0.694357	GBM	0.510801	4.8441e-06	GBM	0.643173	0.590005	GBM	0.512506	0.708102	1.03114e-05	0.632664	1	0	0	0
centr_pathway_AKT2.xlsx	5.55428e-11	GBM	0.68719	1.88806e-16	GBM	0.767333	4.0212e-22	GBM	0.73494	9.00205e-11	1.67763e-15	5.3942e-21	1	1	0	0
centr_pathway_AKT3.xlsx	1.33285e-15	LGG	0.717522	0.0113994	LGG	0.579809	0.486668	LGG	0.52333	2.49721e-15	0.0155032	0.53393	1	0	0	0
centr_pathway_ALAD.xlsx	1.81071e-11	GBM	0.687767	0.0733576	LGG	0.550281	0.354299	GBM	0.504193	2.99247e-11	0.0895297	0.401119	0	0	0	0
centr_pathway_ALAS1.xlsx	0.0123212	LGG	0.563789	0.481225	LGG	0.531544	0.0598521	GBM	0.5471	0.0139032	0.519605	0.0782714	0	0	0	0
centr_pathway_ALAS2.xlsx	9.02796e-13	GBM	0.697589	0.213086	GBM	0.539252	1.24867e-05	GBM	0.617005	1.55389e-12	0.243499	2.8018e-05	1	0	0	0
centr_pathway_ALB.xlsx	0.104098	LGG	0.532892	0.505708	LGG	0.520595	0.0438633	GBM	0.557898	0.112976	0.544383	0.0612458	0	0	0	0
centr_pathway_ALCAM.xlsx	1.37645e-31	LGG	0.803277	1.72709e-14	LGG	0.741837	8.01359e-24	LGG	0.723336	4.53354e-31	1.08928e-13	1.25867e-22	1	1	1	1
centr_pathway_ALDH18A1.xlsx	4.64365e-17	LGG	0.717974	1.2224e-12	LGG	0.724958	5.10212e-08	LGG	0.62618	9.28232e-17	5.61159e-12	1.43829e-07	1	1	0	0
centr_pathway_ALDH1A1.xlsx	0.0569292	GBM	0.555547	0.0550391	LGG	0.565697	0.403338	GBM	0.518009	0.0624191	0.0683604	0.451082	0	0	0	0
centr_pathway_ALDH1A2.xlsx	0.659363	GBM	0.517638	0.0162134	LGG	0.581983	0.752603	LGG	0.511835	0.674256	0.0216858	0.783545	0	0	0	0
centr_pathway_ALDH1A3.xlsx	2.64567e-07	LGG	0.641327	2.02168e-06	LGG	0.659815	0.0171057	LGG	0.5603	3.57575e-07	4.46029e-06	0.0259364	1	1	0	0
centr_pathway_ALDH1B1.xlsx	0.191027	GBM	0.527485	2.57067e-06	LGG	0.655427	0.0565386	LGG	0.554425	0.204028	5.60176e-06	0.0741972	0	0	0	0
centr_pathway_ALDH1L1.xlsx	0.715762	GBM	0.513159	0.394827	LGG	0.551269	0.00342584	LGG	0.575947	0.72824	0.432145	0.00579536	0	0	0	0
centr_pathway_ALDH1L2.xlsx	3.54762e-05	LGG	0.625408	0.259376	LGG	0.562179	0.000986021	LGG	0.583997	4.47345e-05	0.292446	0.00180855	1	0	0	0
centr_pathway_ALDH2.xlsx	0.117829	LGG	0.549839	7.74119e-09	LGG	0.690568	0.00128063	LGG	0.58145	0.127415	2.19417e-08	0.00230966	1	0	0	0
centr_pathway_ALDH3A1.xlsx	5.97953e-09	LGG	0.658375	7.2495e-08	LGG	0.677722	0.00528465	LGG	0.569112	8.58817e-09	1.88411e-07	0.00866231	1	1	0	0
centr_pathway_ALDH3A2.xlsx	0.117829	LGG	0.549839	7.74119e-09	LGG	0.690568	0.00128063	LGG	0.58145	0.127415	2.19417e-08	0.00230966	1	0	0	0
centr_pathway_ALDH3B1.xlsx	1.55862e-07	LGG	0.643911	2.89743e-07	LGG	0.670251	0.0211024	LGG	0.558197	2.11767e-07	7.05041e-07	0.0312775	1	1	0	0
centr_pathway_ALDH3B2.xlsx	1.55862e-07	LGG	0.643911	2.89743e-07	LGG	0.670251	0.0211024	LGG	0.558197	2.11767e-07	7.05041e-07	0.0312775	1	1	0	0
centr_pathway_ALDH4A1.xlsx	2.88313e-21	LGG	0.727646	6.04574e-12	LGG	0.727726	3.67791e-06	LGG	0.629144	6.55615e-21	2.46531e-11	8.63787e-06	1	1	0	0
centr_pathway_ALDH5A1.xlsx	0.00169902	LGG	0.587473	1.78124e-08	LGG	0.685706	4.25376e-06	LGG	0.601014	0.00199901	4.86899e-08	9.94638e-06	1	1	0	0
centr_pathway_ALDH6A1.xlsx	8.71961e-09	LGG	0.644325	6.53323e-17	LGG	0.765752	1.14055e-14	LGG	0.675161	1.24613e-08	6.40085e-16	6.41827e-14	1	1	0	0
centr_pathway_ALDH7A1.xlsx	2.3288e-05	LGG	0.623526	1.59091e-10	LGG	0.709858	0.000625512	LGG	0.585584	2.95652e-05	5.40661e-10	0.00117333	1	1	0	0
centr_pathway_ALDH8A1.xlsx	0.00422812	LGG	0.567653	0.431278	LGG	0.520061	0.280121	LGG	0.524445	0.00489827	0.469213	0.325758	1	0	0	0
centr_pathway_ALDH9A1.xlsx	0.00677548	LGG	0.584337	6.60839e-10	LGG	0.702941	0.000196037	LGG	0.592437	0.00776628	2.09209e-09	0.000390136	1	1	0	0
centr_pathway_ALDOA.xlsx	0.0810687	GBM	0.548648	0.8225	LGG	0.516602	0.00527539	LGG	0.557834	0.0884192	0.841371	0.00864904	0	0	0	0
centr_pathway_ALDOB.xlsx	0.0810687	GBM	0.548648	0.8225	LGG	0.516602	0.00527539	LGG	0.557834	0.0884192	0.841371	0.00864904	0	0	0	0
centr_pathway_ALDOC.xlsx	0.0810687	GBM	0.548648	0.8225	LGG	0.516602	0.00527539	LGG	0.557834	0.0884192	0.841371	0.00864904	0	0	0	0
centr_pathway_ALG1.xlsx	7.07148e-52	GBM	0.93675	1.20614e-20	GBM	0.800577	8.40389e-06	GBM	0.652153	7.52478e-51	2.48778e-19	1.91805e-05	1	1	0	0
centr_pathway_ALG10.xlsx	9.74057e-31	GBM	0.835629	1.46526e-13	GBM	0.753182	6.05547e-13	GBM	0.670175	3.07142e-30	7.78146e-13	2.81066e-12	1	1	0	0
centr_pathway_ALG10B.xlsx	1.11159e-15	GBM	0.725827	2.74744e-10	GBM	0.718357	1.57115e-06	GBM	0.615664	2.0879e-15	9.09623e-10	3.81764e-06	1	1	0	0
centr_pathway_ALG11.xlsx	2.05088e-19	GBM	0.734896	1.65423e-06	GBM	0.658827	0.487749	LGG	0.5048	4.42393e-19	3.68344e-06	0.535037	0	0	0	0
centr_pathway_ALG13.xlsx	1.69955e-65	GBM	0.923767	7.13192e-15	GBM	0.746778	1.44408e-16	GBM	0.695649	6.28497e-64	4.78417e-14	1.00667e-15	1	1	0	0
centr_pathway_ALG14.xlsx	9.53189e-78	GBM	0.949696	1.14628e-18	GBM	0.781485	8.36207e-19	GBM	0.708822	1.73666e-75	1.57767e-17	7.86056e-18	1	1	1	1
centr_pathway_ALG2.xlsx	7.81934e-26	GBM	0.764226	0.0216537	GBM	0.576014	1.02225e-13	GBM	0.666023	2.08982e-25	0.0285319	5.09074e-13	1	1	0	0
centr_pathway_ALG3.xlsx	8.99279e-42	GBM	0.902002	4.0632e-13	GBM	0.74247	0.190237	GBM	0.565504	4.91773e-41	2.03735e-12	0.228107	1	0	0	0
centr_pathway_ALG5.xlsx	5.52917e-52	GBM	0.923052	4.29499e-17	GBM	0.779824	0.0130611	GBM	0.600896	5.91732e-51	4.35663e-16	0.0202541	1	1	0	0
centr_pathway_ALG6.xlsx	2.37064e-58	GBM	0.93739	2.11239e-10	GBM	0.711044	0.000600503	GBM	0.621339	4.70976e-57	7.06915e-10	0.00112812	1	1	0	0
centr_pathway_ALG8.xlsx	7.62251e-45	GBM	0.870202	0.00151317	GBM	0.641039	0.171271	GBM	0.537998	5.25278e-44	0.00225702	0.207201	1	0	0	0
centr_pathway_ALK.xlsx	1.20719e-14	GBM	0.706634	0.00137001	GBM	0.602814	1.75188e-09	GBM	0.63821	2.19997e-14	0.00205667	5.72049e-09	1	1	0	0
centr_pathway_ALMS1.xlsx	0.74668	GBM	0.530257	9.88092e-06	GBM	0.638667	9.83669e-07	GBM	0.619879	0.755683	1.98686e-05	2.43141e-06	1	0	0	0
centr_pathway_ALOX12.xlsx	1.41365e-12	GBM	0.687164	0.00235049	GBM	0.603724	3.20813e-07	GBM	0.621674	2.42256e-12	0.00344523	8.38053e-07	1	1	0	0
centr_pathway_ALOX12B.xlsx	1.41365e-12	GBM	0.687164	0.00235049	GBM	0.603724	3.20813e-07	GBM	0.621674	2.42256e-12	0.00344523	8.38053e-07	1	1	0	0
centr_pathway_ALOX15.xlsx	1.22084e-22	GBM	0.754905	4.44778e-07	GBM	0.6678	2.12124e-10	GBM	0.645109	2.90899e-22	1.06421e-06	7.55629e-10	1	1	0	0
centr_pathway_ALOX15B.xlsx	1.72756e-26	GBM	0.777636	1.19637e-08	GBM	0.686971	3.36892e-14	GBM	0.675361	4.71669e-26	3.3339e-08	1.79796e-13	1	1	0	0
centr_pathway_ALOX5.xlsx	3.96444e-25	GBM	0.76962	2.19837e-06	GBM	0.656929	2.91315e-07	GBM	0.6156	1.02685e-24	4.82864e-06	7.64215e-07	1	1	0	0
centr_pathway_ALPI.xlsx	4.29199e-23	GBM	0.755081	0.142811	LGG	0.531346	0.143083	LGG	0.52925	1.03792e-22	0.167592	0.175988	0	0	0	0
centr_pathway_ALPL.xlsx	3.14077e-55	GBM	0.877879	1.38661e-26	GBM	0.838999	1.01535e-32	GBM	0.778509	4.61842e-54	2.86798e-24	7.01449e-31	1	1	1	1
centr_pathway_ALPP.xlsx	9.00358e-37	GBM	0.837586	1.25718e-07	GBM	0.672464	5.67527e-10	GBM	0.662043	3.84764e-36	3.19616e-07	1.94175e-09	1	1	0	0
centr_pathway_ALPPL2.xlsx	1.04787e-33	GBM	0.819108	1.25718e-07	GBM	0.672464	5.67527e-10	GBM	0.662043	3.80721e-33	3.19616e-07	1.94175e-09	1	1	0	0
centr_pathway_ALYREF.xlsx	2.45456e-14	GBM	0.712253	9.90525e-15	GBM	0.750336	0.0376603	GBM	0.572702	4.44499e-14	6.52695e-14	0.0532841	1	0	0	0
centr_pathway_AMACR.xlsx	3.25843e-05	GBM	0.615736	0.625654	LGG	0.51763	0.954898	GBM	0.513376	4.11296e-05	0.66061	0.964092	0	0	0	0
centr_pathway_AMBP.xlsx	1.08423e-09	GBM	0.672086	8.85691e-11	GBM	0.718832	2.52277e-07	GBM	0.617032	1.60126e-09	3.11225e-10	6.66265e-07	1	1	0	0
centr_pathway_AMBRA1.xlsx	1.14803e-35	LGG	0.848876	2.76771e-05	LGG	0.633449	0.0256859	GBM	0.531181	4.69904e-35	4.93969e-05	0.0374011	0	1	0	0
centr_pathway_AMD1.xlsx	5.07551e-44	GBM	0.881103	1.14899e-30	GBM	0.860424	2.05278e-25	GBM	0.756561	3.27693e-43	1.06943e-27	3.81122e-24	1	1	1	1
centr_pathway_AMDHD1.xlsx	0.0104943	LGG	0.571391	0.181537	LGG	0.571982	1.79616e-05	LGG	0.58252	0.0118723	0.209472	3.96338e-05	1	0	0	0
centr_pathway_AMDHD2.xlsx	3.90511e-16	GBM	0.728361	7.53636e-12	GBM	0.718555	1.61919e-14	GBM	0.681915	7.42269e-16	3.02837e-11	8.98278e-14	1	1	0	0
centr_pathway_AMER1.xlsx	8.70361e-30	GBM	0.842315	7.26112e-07	GBM	0.669223	0.416288	GBM	0.54739	2.63436e-29	1.66665e-06	0.462255	1	0	0	0
centr_pathway_AMH.xlsx	0.00452563	GBM	0.570826	0.0455923	LGG	0.562021	0.00800678	LGG	0.554489	0.0052332	0.0571131	0.0128057	0	0	0	0
centr_pathway_AMHR2.xlsx	9.96146e-05	LGG	0.617266	0.000123527	LGG	0.637046	2.40814e-06	LGG	0.613053	0.000123567	0.000205217	5.72249e-06	1	1	0	0
centr_pathway_AMN.xlsx	9.14266e-14	GBM	0.690087	0.722511	GBM	0.564551	0.118141	GBM	0.588965	1.61877e-13	0.750533	0.147702	1	0	0	0
centr_pathway_AMOT.xlsx	0.194338	GBM	0.529668	0.267009	LGG	0.532532	7.49255e-05	GBM	0.589428	0.207416	0.300461	0.000155903	0	0	0	0
centr_pathway_AMOTL1.xlsx	0.373416	LGG	0.522179	0.241192	GBM	0.546407	0.00119705	GBM	0.568822	0.390784	0.273226	0.0021689	0	0	0	0
centr_pathway_AMOTL2.xlsx	0.373416	LGG	0.522179	0.241192	GBM	0.546407	0.00119705	GBM	0.568822	0.390784	0.273226	0.0021689	0	0	0	0
centr_pathway_AMPD1.xlsx	0.000365097	LGG	0.560841	0.0012608	LGG	0.601629	0.0434518	LGG	0.549675	0.000441951	0.00190193	0.0607395	1	0	0	0
centr_pathway_AMPD2.xlsx	5.14757e-05	LGG	0.569509	0.00180364	LGG	0.596608	0.0506979	LGG	0.545831	6.45716e-05	0.00267422	0.0700011	1	0	0	0
centr_pathway_AMPD3.xlsx	0.000357213	LGG	0.561606	0.00315011	LGG	0.59313	0.135746	LGG	0.537146	0.000433038	0.00456781	0.167822	1	0	0	0
centr_pathway_AMPH.xlsx	0.328437	GBM	0.528426	0.00783172	LGG	0.575302	0.275334	GBM	0.518462	0.34531	0.0108211	0.320491	0	0	0	0
centr_pathway_AMT.xlsx	1.44162e-12	GBM	0.724434	0.545927	LGG	0.531821	0.656718	LGG	0.507293	2.46937e-12	0.583127	0.695585	0	0	0	0
centr_pathway_AMY1A.xlsx	1.80902e-08	GBM	0.654185	4.42208e-05	GBM	0.638272	1.36977e-18	GBM	0.710916	2.56032e-08	7.71843e-05	1.25436e-17	1	1	0	0
centr_pathway_AMY1B.xlsx	2.20855e-18	GBM	0.735988	4.42208e-05	GBM	0.638272	1.36977e-18	GBM	0.710916	4.6135e-18	7.71843e-05	1.25436e-17	1	1	0	0
centr_pathway_AMY1C.xlsx	8.18566e-08	GBM	0.646671	4.42208e-05	GBM	0.638272	1.36977e-18	GBM	0.710916	1.12175e-07	7.71843e-05	1.25436e-17	1	1	0	0
centr_pathway_AMY2A.xlsx	1.41835e-06	GBM	0.629472	0.000689846	GBM	0.610641	7.44011e-13	GBM	0.671789	1.87291e-06	0.00107012	3.42128e-12	1	1	0	0
centr_pathway_AMY2B.xlsx	0.000993535	GBM	0.589568	0.000274087	GBM	0.622421	7.92661e-10	GBM	0.650376	0.00118142	0.000441839	2.65827e-09	1	1	0	0
centr_pathway_ANAPC1.xlsx	2.0075e-44	GBM	0.838489	6.72983e-14	GBM	0.740454	0.000345799	GBM	0.604767	1.33298e-43	3.74237e-13	0.000669389	1	1	0	0
centr_pathway_ANAPC10.xlsx	2.0075e-44	GBM	0.838489	6.72983e-14	GBM	0.740454	0.000345799	GBM	0.604767	1.33298e-43	3.74237e-13	0.000669389	1	1	0	0
centr_pathway_ANAPC11.xlsx	2.0075e-44	GBM	0.838489	6.72983e-14	GBM	0.740454	0.000345799	GBM	0.604767	1.33298e-43	3.74237e-13	0.000669389	1	1	0	0
centr_pathway_ANAPC13.xlsx	0.000192023	LGG	0.563287	0.259711	LGG	0.502095	0.460713	LGG	0.516223	0.000234995	0.292777	0.507472	1	0	0	0
centr_pathway_ANAPC2.xlsx	2.0075e-44	GBM	0.838489	6.72983e-14	GBM	0.740454	0.000345799	GBM	0.604767	1.33298e-43	3.74237e-13	0.000669389	1	1	0	0
centr_pathway_ANAPC4.xlsx	2.0075e-44	GBM	0.838489	6.72983e-14	GBM	0.740454	0.000345799	GBM	0.604767	1.33298e-43	3.74237e-13	0.000669389	1	1	0	0
centr_pathway_ANAPC5.xlsx	2.0075e-44	GBM	0.838489	6.72983e-14	GBM	0.740454	0.000345799	GBM	0.604767	1.33298e-43	3.74237e-13	0.000669389	1	1	0	0
centr_pathway_ANAPC7.xlsx	2.0075e-44	GBM	0.838489	6.72983e-14	GBM	0.740454	0.000345799	GBM	0.604767	1.33298e-43	3.74237e-13	0.000669389	1	1	0	0
centr_pathway_ANGPT1.xlsx	1.70453e-05	GBM	0.615134	0.677869	GBM	0.508657	0.00028323	GBM	0.586364	2.17359e-05	0.708508	0.000554761	1	0	0	0
centr_pathway_ANGPT2.xlsx	1.43832e-31	GBM	0.809009	2.48919e-06	GBM	0.649814	7.00126e-15	GBM	0.693818	4.73315e-31	5.43534e-06	4.0754e-14	1	1	0	0
centr_pathway_ANGPT4.xlsx	3.00961e-30	GBM	0.80147	9.40299e-06	GBM	0.641276	9.75352e-14	GBM	0.685079	9.29383e-30	1.90828e-05	4.88004e-13	1	1	0	0
centr_pathway_ANGPTL1.xlsx	5.72854e-31	GBM	0.805346	1.06696e-05	GBM	0.640169	6.62222e-14	GBM	0.68643	1.82873e-30	2.05472e-05	3.40251e-13	1	1	0	0
centr_pathway_ANGPTL3.xlsx	4.22308e-26	GBM	0.768152	0.377755	LGG	0.501542	0.00107648	GBM	0.571713	1.13845e-25	0.414203	0.00196335	0	0	0	0
centr_pathway_ANGPTL6.xlsx	7.15576e-09	GBM	0.655088	0.012055	GBM	0.575777	4.09397e-07	GBM	0.634946	1.02559e-08	0.0163649	1.05905e-06	1	1	0	0
centr_pathway_ANK1.xlsx	1.3983e-19	LGG	0.737857	0.051781	LGG	0.563641	0.968716	GBM	0.507384	3.0373e-19	0.0644428	0.975662	0	0	0	0
centr_pathway_ANK2.xlsx	1.1296e-23	LGG	0.753462	0.00434346	LGG	0.587556	0.405084	LGG	0.531308	2.7987e-23	0.00619211	0.451661	1	0	0	0
centr_pathway_ANK3.xlsx	4.31019e-34	LGG	0.802938	5.72835e-05	LGG	0.632461	0.124139	LGG	0.542187	1.58295e-33	9.86888e-05	0.154371	1	0	0	0
centr_pathway_ANKH.xlsx	5.88511e-09	GBM	0.670794	0.0345596	GBM	0.572298	0.0611141	GBM	0.557435	8.45581e-09	0.0439882	0.0796978	1	0	0	0
centr_pathway_ANKLE2.xlsx	1.3855e-18	GBM	0.758781	7.59554e-15	GBM	0.748518	0.0092923	GBM	0.560554	2.91458e-18	5.06778e-14	0.0146978	1	1	0	0
centr_pathway_ANKRA2.xlsx	1.78122e-121	LGG	0.962253	4.05238e-23	LGG	0.807178	2.82484e-22	LGG	0.740379	1.33057e-117	2.07429e-21	3.82381e-21	1	1	1	1
centr_pathway_ANP32A.xlsx	4.27079e-38	GBM	0.833597	1.86992e-22	GBM	0.809787	5.23755e-11	GBM	0.668842	1.94411e-37	6.41633e-21	1.99354e-10	1	1	0	0
centr_pathway_ANPEP.xlsx	1.41083e-30	GBM	0.81049	7.03811e-14	GBM	0.743735	8.53564e-09	GBM	0.634792	4.41882e-30	3.91088e-13	2.59379e-08	1	1	0	0
centr_pathway_ANTXR1.xlsx	2.41232e-42	GBM	0.820601	0.000256621	GBM	0.61495	4.68315e-05	GBM	0.590389	1.35591e-41	0.00041449	9.91921e-05	1	1	0	0
centr_pathway_ANTXR2.xlsx	4.49022e-57	GBM	0.86694	3.32785e-08	GBM	0.674638	5.55323e-11	GBM	0.648835	8.02439e-56	8.91016e-08	2.10401e-10	1	1	0	0
centr_pathway_ANXA1.xlsx	4.94236e-55	GBM	0.881743	1.63189e-09	GBM	0.699423	5.82119e-09	GBM	0.665543	7.14109e-54	4.99015e-09	1.7968e-08	1	1	0	0
centr_pathway_ANXA2.xlsx	2.02403e-79	GBM	0.919075	1.47068e-29	GBM	0.832556	2.67223e-62	GBM	0.854461	4.08635e-77	1.09507e-26	1.98947e-58	1	1	1	1
centr_pathway_AOC1.xlsx	2.09134e-22	GBM	0.766095	0.224512	GBM	0.541426	0.0390683	GBM	0.539041	4.94691e-22	0.255654	0.0551087	1	0	0	0
centr_pathway_AOC2.xlsx	0.410097	GBM	0.522869	0.171715	LGG	0.537671	0.801162	GBM	0.505779	0.427554	0.19891	0.828309	0	0	0	0
centr_pathway_AOC3.xlsx	0.840386	LGG	0.503977	0.0846433	LGG	0.547869	0.811189	LGG	0.504365	0.845593	0.102547	0.837512	1	0	0	0
centr_pathway_AOX1.xlsx	0.00024327	GBM	0.600018	0.0165548	LGG	0.568662	0.34515	GBM	0.522986	0.000296641	0.0221067	0.391714	0	0	0	0
centr_pathway_AP1B1.xlsx	9.1708e-22	GBM	0.731861	3.83213e-05	GBM	0.627797	3.39775e-09	GBM	0.630214	2.11307e-21	6.72497e-05	1.07552e-08	1	1	0	0
centr_pathway_AP1G1.xlsx	9.1708e-22	GBM	0.731861	3.83213e-05	GBM	0.627797	3.39775e-09	GBM	0.630214	2.11307e-21	6.72497e-05	1.07552e-08	1	1	0	0
centr_pathway_AP1M1.xlsx	9.1708e-22	GBM	0.731861	3.83213e-05	GBM	0.627797	3.39775e-09	GBM	0.630214	2.11307e-21	6.72497e-05	1.07552e-08	1	1	0	0
centr_pathway_AP1M2.xlsx	9.1708e-22	GBM	0.731861	3.83213e-05	GBM	0.627797	3.39775e-09	GBM	0.630214	2.11307e-21	6.72497e-05	1.07552e-08	1	1	0	0
centr_pathway_AP1S1.xlsx	9.1708e-22	GBM	0.731861	3.83213e-05	GBM	0.627797	3.39775e-09	GBM	0.630214	2.11307e-21	6.72497e-05	1.07552e-08	1	1	0	0
centr_pathway_AP1S2.xlsx	9.1708e-22	GBM	0.731861	3.83213e-05	GBM	0.627797	3.39775e-09	GBM	0.630214	2.11307e-21	6.72497e-05	1.07552e-08	1	1	0	0
centr_pathway_AP1S3.xlsx	9.1708e-22	GBM	0.731861	3.83213e-05	GBM	0.627797	3.39775e-09	GBM	0.630214	2.11307e-21	6.72497e-05	1.07552e-08	1	1	0	0
centr_pathway_AP2A1.xlsx	0.00321826	GBM	0.5739	0.633598	GBM	0.507392	0.138412	GBM	0.53517	0.00374577	0.66805	0.170892	1	0	0	0
centr_pathway_AP2A2.xlsx	3.87194e-19	GBM	0.722101	0.000379851	GBM	0.606965	9.5056e-05	GBM	0.589419	8.28988e-19	0.00060461	0.000195765	1	1	0	0
centr_pathway_AP2B1.xlsx	1.11369e-19	GBM	0.725262	0.000275323	GBM	0.609297	9.81449e-05	GBM	0.58931	2.42757e-19	0.000443542	0.000201959	1	1	0	0
centr_pathway_AP2M1.xlsx	5.78951e-08	GBM	0.632433	0.320452	GBM	0.522531	0.0875061	GBM	0.540147	7.98368e-08	0.356238	0.11146	1	0	0	0
centr_pathway_AP2S1.xlsx	1.11369e-19	GBM	0.725262	0.000275323	GBM	0.609297	9.81449e-05	GBM	0.58931	2.42757e-19	0.000443542	0.000201959	1	1	0	0
centr_pathway_AP3B1.xlsx	2.03022e-06	LGG	0.617316	0.00116353	LGG	0.606925	0.556576	LGG	0.524781	2.66721e-06	0.00176377	0.601845	1	0	0	0
centr_pathway_AP3B2.xlsx	6.47725e-57	LGG	0.913832	1.23629e-12	LGG	0.723022	2.73816e-16	LGG	0.694135	1.13847e-55	5.66836e-12	1.87024e-15	1	1	0	0
centr_pathway_AP3M1.xlsx	5.27212e-14	GBM	0.705316	5.02825e-06	GBM	0.653846	4.87342e-08	GBM	0.626914	9.43977e-14	1.06431e-05	1.37643e-07	1	1	0	0
centr_pathway_AP3S1.xlsx	2.03022e-06	LGG	0.617316	0.00116353	LGG	0.606925	0.556576	LGG	0.524781	2.66721e-06	0.00176377	0.601845	1	0	0	0
centr_pathway_AP4B1.xlsx	2.03022e-06	LGG	0.617316	0.00116353	LGG	0.606925	0.556576	LGG	0.524781	2.66721e-06	0.00176377	0.601845	1	0	0	0
centr_pathway_AP4E1.xlsx	2.03022e-06	LGG	0.617316	0.00116353	LGG	0.606925	0.556576	LGG	0.524781	2.66721e-06	0.00176377	0.601845	1	0	0	0
centr_pathway_APAF1.xlsx	0.128071	LGG	0.557667	0.00646945	GBM	0.570638	8.40028e-05	GBM	0.604658	0.138329	0.00901075	0.000173771	0	0	0	0
centr_pathway_APBB1.xlsx	9.57522e-20	LGG	0.748093	5.34781e-16	LGG	0.762985	2.00784e-10	LGG	0.646487	2.09143e-19	4.4641e-15	7.16948e-10	1	1	0	0
centr_pathway_APBB1IP.xlsx	1.81535e-42	GBM	0.846957	1.57633e-20	GBM	0.80287	6.18111e-25	GBM	0.738874	1.02732e-41	3.1637e-19	1.09568e-23	1	1	1	1
centr_pathway_APC.xlsx	3.67039e-25	GBM	0.804343	8.85126e-05	GBM	0.631157	0.51542	GBM	0.549711	9.52008e-25	0.000149516	0.560927	1	0	0	0
centr_pathway_APC2.xlsx	3.26988e-27	LGG	0.831063	2.73309e-20	LGG	0.797138	1.344e-13	LGG	0.680972	9.104e-27	5.19147e-19	6.62218e-13	1	1	0	0
centr_pathway_APCS.xlsx	1.71616e-48	GBM	0.932322	3.40584e-20	GBM	0.800854	1.03209e-05	GBM	0.747985	1.46011e-47	6.30842e-19	2.33128e-05	1	1	1	1
centr_pathway_APEX1.xlsx	2.31729e-69	GBM	0.923779	1.33946e-27	GBM	0.841015	2.29196e-08	GBM	0.634756	1.37382e-67	4.74935e-25	6.68376e-08	1	1	0	0
centr_pathway_APH1A.xlsx	0.194702	LGG	0.524688	0.177114	GBM	0.541742	0.94499	GBM	0.502652	0.207775	0.204781	0.955515	0	0	0	0
centr_pathway_APH1B.xlsx	0.00403114	LGG	0.572269	0.781983	GBM	0.50755	0.56179	LGG	0.510593	0.00467224	0.804677	0.605988	0	0	0	0
centr_pathway_APIP.xlsx	8.34264e-13	GBM	0.710497	0.061949	LGG	0.558542	0.010563	GBM	0.543429	1.43759e-12	0.0764201	0.0165492	0	0	0	0
centr_pathway_APLF.xlsx	0.140852	GBM	0.539076	1.52548e-05	GBM	0.64764	0.00100387	GBM	0.572049	0.15163	2.82344e-05	0.00183904	1	0	0	0
centr_pathway_APLN.xlsx	8.55882e-12	GBM	0.681043	0.0745294	GBM	0.560677	0.428383	GBM	0.548632	1.42679e-11	0.0909151	0.474953	1	0	0	0
centr_pathway_APLNR.xlsx	2.41963e-07	GBM	0.637877	0.842654	LGG	0.502174	0.697182	LGG	0.51615	3.27498e-07	0.859978	0.732504	0	0	0	0
centr_pathway_APOA1.xlsx	2.97093e-41	GBM	0.851673	1.88226e-11	GBM	0.725512	2.76381e-23	GBM	0.738212	1.60122e-40	7.16164e-11	4.13184e-22	1	1	1	1
centr_pathway_APOA2.xlsx	3.772e-26	GBM	0.786015	1.469e-10	GBM	0.712033	7.61652e-25	GBM	0.737723	1.01795e-25	5.01751e-10	1.33738e-23	1	1	1	1
centr_pathway_APOA5.xlsx	2.54285e-20	GBM	0.74995	7.11244e-06	GBM	0.658985	9.11175e-07	GBM	0.6123	5.63485e-20	1.46986e-05	2.28254e-06	1	1	0	0
centr_pathway_APOB.xlsx	1.10365e-42	GBM	0.861922	1.55577e-15	GBM	0.760139	2.57413e-30	GBM	0.767005	6.34665e-42	1.1992e-14	9.44059e-29	1	1	1	1
centr_pathway_APOC2.xlsx	1.48537e-21	GBM	0.758994	2.93296e-09	GBM	0.699581	1.36292e-21	GBM	0.721133	3.39838e-21	8.71809e-09	1.72274e-20	1	1	0	0
centr_pathway_APOC3.xlsx	1.48537e-21	GBM	0.758994	2.93296e-09	GBM	0.699581	1.36292e-21	GBM	0.721133	3.39838e-21	8.71809e-09	1.72274e-20	1	1	0	0
centr_pathway_APOE.xlsx	4.58056e-32	GBM	0.815608	1.26984e-12	GBM	0.735987	1.87498e-25	GBM	0.741567	1.5539e-31	5.81503e-12	3.49855e-24	1	1	1	1
centr_pathway_APOF.xlsx	0.0108846	GBM	0.567678	0.968057	LGG	0.501067	0.00470218	GBM	0.562231	0.0123082	0.971319	0.00778468	0	0	0	0
centr_pathway_APP.xlsx	6.59193e-41	GBM	0.846593	2.55598e-06	GBM	0.663056	0.000382823	GBM	0.610578	3.48244e-40	5.573e-06	0.000734377	1	1	0	0
centr_pathway_APPBP2.xlsx	7.69421e-11	LGG	0.631404	0.000100485	LGG	0.641039	0.00173392	LGG	0.579637	1.24138e-10	0.000168935	0.00307725	1	1	0	0
centr_pathway_APPL1.xlsx	4.39718e-11	LGG	0.678709	0.000244759	LGG	0.619021	0.504995	LGG	0.517157	7.14219e-11	0.000395932	0.551598	1	0	0	0
centr_pathway_APRT.xlsx	0.000289025	LGG	0.565658	0.000172679	LGG	0.621077	0.00676509	LGG	0.570635	0.00035146	0.000283271	0.0108923	1	1	0	0
centr_pathway_APTX.xlsx	0.234536	LGG	0.533293	0.000122231	GBM	0.622105	0.0804325	GBM	0.538071	0.24925	0.000203201	0.102908	0	0	0	0
centr_pathway_AQP1.xlsx	2.28316e-33	GBM	0.786781	0.00519018	GBM	0.608546	0.000434483	GBM	0.610659	8.15257e-33	0.00731657	0.000829631	1	1	0	0
centr_pathway_AQP2.xlsx	8.28333e-12	GBM	0.663493	0.20114	LGG	0.523045	0.0193671	GBM	0.55196	1.38148e-11	0.230343	0.0291565	0	0	0	0
centr_pathway_AQP3.xlsx	4.76912e-53	GBM	0.842867	1.88497e-05	GBM	0.647561	1.27624e-05	GBM	0.618202	5.67282e-52	3.43501e-05	2.86021e-05	1	1	0	0
centr_pathway_AQP5.xlsx	7.3061e-43	GBM	0.821592	1.88497e-05	GBM	0.647561	1.27624e-05	GBM	0.618202	4.26047e-42	3.43501e-05	2.86021e-05	1	1	0	0
centr_pathway_AQP7.xlsx	0.435574	LGG	0.524361	0.0451524	GBM	0.524429	0.00986304	GBM	0.550899	0.452536	0.0566001	0.0155672	0	0	0	0
centr_pathway_AQP8.xlsx	0.0260051	LGG	0.542187	0.702645	GBM	0.508677	0.0030374	LGG	0.561873	0.029011	0.731529	0.00517708	0	0	0	0
centr_pathway_AQP9.xlsx	0.435574	LGG	0.524361	0.0451524	GBM	0.524429	0.00986304	GBM	0.550899	0.452536	0.0566001	0.0155672	0	0	0	0
centr_pathway_AR.xlsx	1.62336e-08	LGG	0.646232	0.152416	LGG	0.52684	2.64646e-05	LGG	0.609363	2.30017e-08	0.178161	5.73758e-05	1	0	0	0
centr_pathway_ARAF.xlsx	7.16828e-25	LGG	0.751079	9.24776e-05	LGG	0.610483	0.00171146	LGG	0.581187	1.83821e-24	0.000156001	0.00304028	1	1	0	0
centr_pathway_ARAP1.xlsx	1.01943e-62	GBM	0.920004	2.8641e-19	GBM	0.78188	1.01186e-11	GBM	0.656214	3.02189e-61	4.46153e-18	4.18284e-11	1	1	0	0
centr_pathway_ARAP2.xlsx	7.81769e-56	GBM	0.88932	1.80072e-13	GBM	0.729702	9.26296e-09	GBM	0.626787	1.20907e-54	9.38947e-13	2.80565e-08	1	1	0	0
centr_pathway_ARAP3.xlsx	1.95838e-59	GBM	0.883123	6.79172e-12	GBM	0.716104	7.73076e-10	GBM	0.653132	4.57159e-58	2.75142e-11	2.5961e-09	1	1	0	0
centr_pathway_ARC.xlsx	0.595279	LGG	0.512783	0.000125944	GBM	0.629022	9.82061e-07	GBM	0.611385	0.610564	0.00020914	2.43141e-06	0	0	0	0
centr_pathway_ARCN1.xlsx	6.36055e-38	GBM	0.867567	9.84621e-17	GBM	0.776702	1.59823e-17	GBM	0.706102	2.85365e-37	9.222e-16	1.22039e-16	1	1	1	1
centr_pathway_AREG.xlsx	4.75393e-10	GBM	0.668461	0.0014915	GBM	0.597992	1.64786e-06	GBM	0.628301	7.09244e-10	0.00222648	3.9884e-06	1	1	0	0
centr_pathway_ARF1.xlsx	1.98864e-26	GBM	0.758957	2.65894e-08	GBM	0.674955	3.7155e-16	GBM	0.684218	5.3993e-26	7.18378e-08	2.49882e-15	1	1	0	0
centr_pathway_ARF3.xlsx	5.26235e-08	LGG	0.63804	0.00254434	LGG	0.600324	0.777723	GBM	0.511763	7.27016e-08	0.00371546	0.80609	0	0	0	0
centr_pathway_ARF4.xlsx	3.45385e-10	GBM	0.667858	0.652258	GBM	0.507313	1.2677e-05	GBM	0.597686	5.17039e-10	0.685395	2.84279e-05	1	0	0	0
centr_pathway_ARF5.xlsx	0.578118	GBM	0.513485	0.781105	GBM	0.505099	0.0252692	GBM	0.556937	0.594349	0.804245	0.0369097	1	0	0	0
centr_pathway_ARF6.xlsx	3.61241e-05	LGG	0.615962	0.00176928	LGG	0.598348	0.566046	LGG	0.51674	4.55438e-05	0.00262484	0.609519	1	0	0	0
centr_pathway_ARFGAP1.xlsx	3.94473e-22	GBM	0.745083	4.4151e-12	GBM	0.718871	2.15701e-12	GBM	0.662904	9.21136e-22	1.83045e-11	9.52856e-12	1	1	0	0
centr_pathway_ARFGAP3.xlsx	1.10136e-31	LGG	0.83021	0.00116051	LGG	0.59483	0.586345	LGG	0.514228	3.64195e-31	0.00176377	0.629082	1	0	0	0
centr_pathway_ARFGEF1.xlsx	4.69116e-09	GBM	0.671158	0.0627872	GBM	0.563918	0.308535	GBM	0.526123	6.76766e-09	0.0774157	0.356076	1	0	0	0
centr_pathway_ARFGEF2.xlsx	7.739e-25	GBM	0.795311	1.24233e-08	GBM	0.691715	1.23275e-08	GBM	0.638382	1.98252e-24	3.45164e-08	3.69923e-08	1	1	0	0
centr_pathway_ARFIP1.xlsx	3.79093e-19	GBM	0.741884	3.82712e-13	GBM	0.730809	1.07527e-05	GBM	0.606099	8.12109e-19	1.92415e-12	2.42515e-05	1	1	0	0
centr_pathway_ARFIP2.xlsx	5.45573e-25	GBM	0.792902	1.92906e-12	GBM	0.726737	0.506017	GBM	0.517012	1.40484e-24	8.43442e-12	0.55247	1	0	0	0
centr_pathway_ARG1.xlsx	4.97848e-08	GBM	0.647461	0.380117	GBM	0.52684	0.170871	GBM	0.545532	6.88817e-08	0.416534	0.20675	1	0	0	0
centr_pathway_ARG2.xlsx	6.50503e-07	GBM	0.62971	0.349393	GBM	0.541149	0.114341	GBM	0.55322	8.66951e-07	0.38542	0.143287	1	0	0	0
centr_pathway_ARHGAP1.xlsx	5.22777e-39	GBM	0.891678	2.93396e-12	GBM	0.725433	9.46469e-11	GBM	0.64665	2.48419e-38	1.24622e-11	3.48318e-10	1	1	0	0
centr_pathway_ARHGAP10.xlsx	1.45143e-54	GBM	0.889458	1.80118e-15	GBM	0.753617	2.139e-08	GBM	0.625726	2.038e-53	1.38407e-14	6.26964e-08	1	1	0	0
centr_pathway_ARHGAP11A.xlsx	1.16288e-67	GBM	0.906606	2.56849e-17	GBM	0.762155	6.20342e-13	GBM	0.663258	5.53294e-66	2.70127e-16	2.87575e-12	1	1	0	0
centr_pathway_ARHGAP11B.xlsx	2.2367e-65	GBM	0.901224	8.12069e-15	GBM	0.742312	4.09893e-11	GBM	0.649288	8.11074e-64	5.37482e-14	1.57953e-10	1	1	0	0
centr_pathway_ARHGAP12.xlsx	7.32674e-41	GBM	0.835817	2.45729e-08	GBM	0.673176	2.98833e-05	GBM	0.594613	3.86517e-40	6.65587e-08	6.44313e-05	1	1	0	0
centr_pathway_ARHGAP15.xlsx	2.19953e-52	GBM	0.868032	2.59126e-12	GBM	0.716223	4.59352e-08	GBM	0.623242	2.42696e-51	1.11272e-11	1.30779e-07	1	1	0	0
centr_pathway_ARHGAP17.xlsx	6.38526e-52	GBM	0.87039	1.94354e-11	GBM	0.706538	1.10485e-05	GBM	0.606263	6.81399e-51	7.37971e-11	2.48958e-05	1	1	0	0
centr_pathway_ARHGAP18.xlsx	6.72985e-56	GBM	0.88597	4.62143e-14	GBM	0.735552	1.90969e-10	GBM	0.645761	1.05172e-54	2.64701e-13	6.83211e-10	1	1	0	0
centr_pathway_ARHGAP19.xlsx	1.04919e-47	GBM	0.857256	1.09042e-11	GBM	0.710254	1.79258e-07	GBM	0.619643	8.61258e-47	4.29365e-11	4.80236e-07	1	1	0	0
centr_pathway_ARHGAP20.xlsx	2.45867e-52	GBM	0.864155	3.00336e-10	GBM	0.695865	2.22963e-08	GBM	0.628936	2.7049e-51	9.90389e-10	6.50964e-08	1	1	0	0
centr_pathway_ARHGAP22.xlsx	4.52605e-37	GBM	0.817063	4.28809e-09	GBM	0.680291	0.000116676	GBM	0.5864	1.96911e-36	1.25409e-08	0.000238641	1	1	0	0
centr_pathway_ARHGAP23.xlsx	1.82815e-46	GBM	0.843482	1.91993e-09	GBM	0.682742	4.25155e-07	GBM	0.615328	1.38784e-45	5.83026e-09	1.09829e-06	1	1	0	0
centr_pathway_ARHGAP24.xlsx	2.00071e-37	GBM	0.823386	1.99566e-09	GBM	0.687327	5.53276e-06	GBM	0.604486	8.8069e-37	6.0479e-09	1.28242e-05	1	1	0	0
centr_pathway_ARHGAP25.xlsx	4.72039e-52	GBM	0.867053	2.45238e-12	GBM	0.718555	8.78506e-09	GBM	0.630504	5.07356e-51	1.05613e-11	2.66415e-08	1	1	0	0
centr_pathway_ARHGAP26.xlsx	1.21123e-43	GBM	0.838251	4.45253e-10	GBM	0.692347	5.955e-09	GBM	0.632371	7.52733e-43	1.43336e-09	1.83658e-08	1	1	0	0
centr_pathway_ARHGAP29.xlsx	4.59033e-53	GBM	0.87675	2.32575e-12	GBM	0.721559	1.22143e-10	GBM	0.649315	5.46886e-52	1.00742e-11	4.46201e-10	1	1	0	0
centr_pathway_ARHGAP30.xlsx	8.1668e-46	GBM	0.852401	8.02684e-11	GBM	0.701439	2.72526e-09	GBM	0.633006	5.98685e-45	2.83798e-10	8.72293e-09	1	1	0	0
centr_pathway_ARHGAP31.xlsx	2.58663e-43	GBM	0.844373	9.02983e-09	GBM	0.681477	2.67575e-05	GBM	0.597433	1.55824e-42	2.54105e-08	5.79771e-05	1	1	0	0
centr_pathway_ARHGAP32.xlsx	9.76288e-47	GBM	0.867555	5.01075e-13	GBM	0.726619	8.94986e-12	GBM	0.657891	7.50295e-46	2.489e-12	3.7349e-11	1	1	0	0
centr_pathway_ARHGAP33.xlsx	3.54249e-51	GBM	0.858209	5.95315e-12	GBM	0.714404	1.92186e-05	GBM	0.602573	3.59056e-50	2.43155e-11	4.22821e-05	1	1	0	0
centr_pathway_ARHGAP35.xlsx	1.95413e-21	GBM	0.725162	0.00327839	GBM	0.593367	0.40234	GBM	0.522406	4.45992e-21	0.00474735	0.450237	1	0	0	0
centr_pathway_ARHGAP36.xlsx	1.41699e-26	GBM	0.767776	1.23275e-06	GBM	0.644992	0.000121222	GBM	0.589074	3.87725e-26	2.77312e-06	0.000247395	1	1	0	0
centr_pathway_ARHGAP39.xlsx	1.43341e-45	GBM	0.843168	1.29791e-12	GBM	0.722152	2.74278e-07	GBM	0.627358	1.03455e-44	5.92534e-12	7.21045e-07	1	1	0	0
centr_pathway_ARHGAP4.xlsx	1.22266e-57	GBM	0.901914	5.11571e-17	GBM	0.763499	2.87941e-08	GBM	0.623261	2.24957e-56	5.11296e-16	8.33809e-08	1	1	0	0
centr_pathway_ARHGAP44.xlsx	1.22594e-27	GBM	0.774964	1.05078e-06	GBM	0.651079	0.000586737	GBM	0.582094	3.45446e-27	2.37887e-06	0.00110393	1	1	0	0
centr_pathway_ARHGAP5.xlsx	4.30248e-34	GBM	0.813965	1.16839e-16	GBM	0.76425	3.87819e-07	GBM	0.616643	1.58089e-33	1.08884e-15	1.00568e-06	1	1	0	0
centr_pathway_ARHGAP6.xlsx	2.45741e-56	GBM	0.900999	1.13793e-15	GBM	0.752312	2.55925e-09	GBM	0.634874	3.98196e-55	8.95672e-15	8.2163e-09	1	1	0	0
centr_pathway_ARHGAP8.xlsx	6.28074e-47	GBM	0.853543	1.9567e-11	GBM	0.706538	1.41787e-06	GBM	0.610804	4.88212e-46	7.41832e-11	3.45308e-06	1	1	0	0
centr_pathway_ARHGAP9.xlsx	4.84812e-52	GBM	0.870239	2.28177e-12	GBM	0.716223	2.54405e-06	GBM	0.610306	5.20337e-51	9.88944e-12	6.03585e-06	1	1	0	0
centr_pathway_ARHGDIA.xlsx	1.00573e-05	GBM	0.615171	0.298528	GBM	0.540201	0.0684945	LGG	0.540274	1.29175e-05	0.333359	0.0885162	0	0	0	0
centr_pathway_ARHGDIB.xlsx	2.14749e-52	GBM	0.870202	4.27108e-14	GBM	0.739347	7.36069e-17	GBM	0.693891	2.38008e-51	2.45579e-13	5.24907e-16	1	1	0	0
centr_pathway_ARHGDIG.xlsx	4.08748e-25	GBM	0.760425	2.47666e-06	GBM	0.651079	0.0687562	GBM	0.540564	1.05762e-24	5.41432e-06	0.0888389	1	0	0	0
centr_pathway_ARHGEF1.xlsx	9.03383e-10	GBM	0.645667	0.00140346	GBM	0.605226	4.69217e-14	GBM	0.673275	1.33841e-09	0.00210434	2.4549e-13	1	1	0	0
centr_pathway_ARHGEF10.xlsx	1.44756e-09	LGG	0.648954	0.451873	LGG	0.514665	0.00309526	GBM	0.563409	2.12734e-09	0.490187	0.00527208	0	0	0	0
centr_pathway_ARHGEF10L.xlsx	1.79851e-05	LGG	0.592478	0.298376	LGG	0.525615	0.16116	LGG	0.527809	2.29147e-05	0.333239	0.196309	1	0	0	0
centr_pathway_ARHGEF11.xlsx	0.245869	GBM	0.530847	0.686364	GBM	0.523678	8.03668e-05	GBM	0.59396	0.260738	0.716181	0.000166666	1	0	0	0
centr_pathway_ARHGEF12.xlsx	0.277603	GBM	0.531274	0.686364	GBM	0.523678	8.03668e-05	GBM	0.59396	0.29335	0.716181	0.000166666	1	0	0	0
centr_pathway_ARHGEF15.xlsx	9.11581e-07	LGG	0.621983	0.885989	GBM	0.523362	0.00229998	GBM	0.566347	1.21036e-06	0.899641	0.00397109	0	0	0	0
centr_pathway_ARHGEF16.xlsx	0.000128091	GBM	0.584149	0.0056107	GBM	0.596253	4.74467e-09	GBM	0.634792	0.000158076	0.00787508	1.47552e-08	1	1	0	0
centr_pathway_ARHGEF17.xlsx	4.13997e-44	GBM	0.842014	1.59348e-10	GBM	0.699344	0.000106115	GBM	0.594659	2.68918e-43	5.41289e-10	0.000217699	1	1	0	0
centr_pathway_ARHGEF18.xlsx	3.79808e-42	GBM	0.83933	1.54817e-07	GBM	0.664519	0.424666	GBM	0.526739	2.11413e-41	3.88791e-07	0.471183	1	0	0	0
centr_pathway_ARHGEF2.xlsx	7.09201e-11	GBM	0.667946	0.0366221	GBM	0.588347	3.79405e-07	GBM	0.625028	1.14546e-10	0.0464942	9.84892e-07	1	1	0	0
centr_pathway_ARHGEF25.xlsx	0.000405102	GBM	0.605123	0.00544751	GBM	0.614041	0.0142549	GBM	0.56554	0.000489345	0.00766047	0.0220183	1	1	0	0
centr_pathway_ARHGEF26.xlsx	0.937135	LGG	0.51065	0.664764	GBM	0.516484	0.921434	LGG	0.504583	0.939147	0.696669	0.93538	0	0	0	0
centr_pathway_ARHGEF28.xlsx	1.00066e-05	GBM	0.624216	0.00620456	GBM	0.596569	0.000135766	GBM	0.599373	1.28546e-05	0.00866776	0.000275868	1	1	0	0
centr_pathway_ARHGEF3.xlsx	1.20361e-07	GBM	0.624655	0.00238741	GBM	0.60736	2.47871e-11	GBM	0.65111	1.64098e-07	0.00349797	9.78597e-11	1	1	0	0
centr_pathway_ARHGEF4.xlsx	0.0274913	LGG	0.559474	0.264361	LGG	0.527789	0.0650558	GBM	0.54604	0.0306142	0.297706	0.0843799	0	0	0	0
centr_pathway_ARHGEF5.xlsx	4.99611e-16	LGG	0.705793	0.00281012	LGG	0.574947	0.110141	GBM	0.533194	9.46751e-16	0.00408977	0.138257	0	0	0	0
centr_pathway_ARHGEF6.xlsx	0.0423757	GBM	0.552311	0.000200413	GBM	0.62582	8.22425e-08	GBM	0.627821	0.0467849	0.000326681	2.27028e-07	1	1	0	0
centr_pathway_ARHGEF7.xlsx	8.41858e-14	GBM	0.680353	1.2228e-07	GBM	0.677089	2.75685e-11	GBM	0.659913	1.49162e-13	3.11494e-07	1.08712e-10	1	1	0	0
centr_pathway_ARHGEF9.xlsx	0.0097542	GBM	0.558382	0.0277544	GBM	0.583169	2.43923e-07	GBM	0.620006	0.011045	0.0361609	6.45347e-07	1	1	0	0
centr_pathway_ARID1A.xlsx	7.33657e-05	LGG	0.60629	0.00462646	LGG	0.608862	0.0247633	LGG	0.604549	9.14012e-05	0.00658421	0.0362135	1	1	0	0
centr_pathway_ARID1B.xlsx	0.418421	LGG	0.521376	0.182065	LGG	0.564076	0.0710546	LGG	0.586753	0.435806	0.209886	0.0916019	1	0	0	0
centr_pathway_ARID2.xlsx	0.418421	LGG	0.521376	0.182065	LGG	0.564076	0.0710546	LGG	0.586753	0.435806	0.209886	0.0916019	1	0	0	0
centr_pathway_ARID4B.xlsx	9.76034e-43	GBM	0.912251	5.26263e-18	GBM	0.793264	1.69097e-05	GBM	0.737043	5.62575e-42	6.32025e-17	3.74459e-05	1	1	1	1
centr_pathway_ARID5B.xlsx	7.92128e-14	GBM	0.746839	0.122714	LGG	0.563523	0.00135937	GBM	0.613515	1.40484e-13	0.145707	0.00244338	0	0	0	0
centr_pathway_ARIH1.xlsx	2.14148e-13	GBM	0.719404	9.42331e-08	GBM	0.688829	6.29188e-15	GBM	0.682858	3.74283e-13	2.42453e-07	3.68553e-14	1	1	0	0
centr_pathway_ARIH2.xlsx	3.62125e-34	GBM	0.798585	5.31606e-07	GBM	0.684007	0.00219178	GBM	0.602827	1.33452e-33	1.23621e-06	0.00379131	1	1	0	0
centr_pathway_ARL2.xlsx	0.00125126	GBM	0.614569	0.0184945	GBM	0.581587	0.00142188	GBM	0.570607	0.00148293	0.0245823	0.00255021	1	1	0	0
centr_pathway_ARNT.xlsx	0.207379	LGG	0.527673	0.0571502	GBM	0.55704	0.00374185	GBM	0.557	0.220924	0.0706878	0.00629406	0	0	0	0
centr_pathway_ARNTL.xlsx	0.374004	GBM	0.515768	0.277075	LGG	0.530991	0.101049	LGG	0.540192	0.391345	0.310521	0.127338	0	0	0	0
centr_pathway_ARPC1A.xlsx	8.73915e-43	GBM	0.853944	2.1431e-17	GBM	0.772551	1.57789e-15	GBM	0.6907	5.06844e-42	2.28618e-16	9.94696e-15	1	1	0	0
centr_pathway_ARPC1B.xlsx	0.00014417	GBM	0.606139	0.018903	GBM	0.583524	0.207685	GBM	0.529223	0.000177305	0.025076	0.247658	1	0	0	0
centr_pathway_ARPC2.xlsx	1.58852e-38	GBM	0.833183	2.01054e-15	GBM	0.756858	2.34025e-14	GBM	0.68323	7.34297e-38	1.5137e-14	1.27549e-13	1	1	0	0
centr_pathway_ARPC3.xlsx	1.58852e-38	GBM	0.833183	2.01054e-15	GBM	0.756858	2.34025e-14	GBM	0.68323	7.34297e-38	1.5137e-14	1.27549e-13	1	1	0	0
centr_pathway_ARPC4.xlsx	1.58852e-38	GBM	0.833183	2.01054e-15	GBM	0.756858	2.34025e-14	GBM	0.68323	7.34297e-38	1.5137e-14	1.27549e-13	1	1	0	0
centr_pathway_ARPC5.xlsx	8.60283e-36	GBM	0.821767	1.20562e-14	GBM	0.750257	2.81705e-14	GBM	0.682803	3.53872e-35	7.8608e-14	1.51539e-13	1	1	0	0
centr_pathway_ARPC5L.xlsx	0.811156	LGG	0.501167	0.69796	LGG	0.511621	0.0519596	LGG	0.556909	0.818276	0.727465	0.0716104	1	0	0	0
centr_pathway_ARR3.xlsx	0.00528958	LGG	0.576333	0.00046848	LGG	0.61159	0.120816	LGG	0.529531	0.00610242	0.000740616	0.150641	1	0	0	0
centr_pathway_ARRB1.xlsx	5.40336e-20	GBM	0.741131	0.249799	GBM	0.531188	0.00481998	GBM	0.557299	1.18855e-19	0.282289	0.00797439	1	0	0	0
centr_pathway_ARRB2.xlsx	2.98983e-40	GBM	0.862386	3.48641e-06	GBM	0.654241	0.00177746	GBM	0.580924	1.53498e-39	7.505e-06	0.00314851	1	1	0	0
centr_pathway_ARSA.xlsx	2.91983e-08	GBM	0.670756	0.5342	GBM	0.529172	0.698898	LGG	0.502507	4.10755e-08	0.571584	0.733892	0	0	0	0
centr_pathway_ARSB.xlsx	3.86215e-32	GBM	0.827525	5.73715e-11	GBM	0.712823	1.12342e-07	GBM	0.628772	1.31616e-31	2.05182e-10	3.07155e-07	1	1	0	0
centr_pathway_ARSD.xlsx	1.15215e-58	GBM	0.893221	1.03448e-11	GBM	0.726698	5.10491e-24	GBM	0.729237	2.40407e-57	4.09068e-11	8.31371e-23	1	1	1	1
centr_pathway_ARSE.xlsx	9.06857e-50	GBM	0.876888	2.10719e-11	GBM	0.713851	1.24032e-14	GBM	0.678035	8.51033e-49	7.94841e-11	6.95343e-14	1	1	0	0
centr_pathway_ARSF.xlsx	2.25044e-30	GBM	0.787935	9.90035e-07	GBM	0.653886	2.8697e-12	GBM	0.664319	6.98124e-30	2.24545e-06	1.24868e-11	1	1	0	0
centr_pathway_ARSG.xlsx	3.23612e-22	GBM	0.776519	4.55065e-05	GBM	0.63001	1.50311e-05	GBM	0.611521	7.57324e-22	7.92797e-05	3.3495e-05	1	1	0	0
centr_pathway_ARSH.xlsx	1.54872e-28	GBM	0.80561	6.01502e-13	GBM	0.731718	2.1937e-13	GBM	0.665914	4.48757e-28	2.94463e-12	1.05369e-12	1	1	0	0
centr_pathway_ARSI.xlsx	1.07402e-26	GBM	0.806501	9.75312e-09	GBM	0.686181	1.88507e-13	GBM	0.667836	2.94528e-26	2.73528e-08	9.1668e-13	1	1	0	0
centr_pathway_ARSJ.xlsx	4.9745e-47	GBM	0.885406	3.12978e-13	GBM	0.736738	1.89686e-20	GBM	0.723843	3.89922e-46	1.58773e-12	2.11093e-19	1	1	1	1
centr_pathway_ARSK.xlsx	4.66303e-42	GBM	0.881304	3.3787e-13	GBM	0.734011	4.78836e-21	GBM	0.718903	2.5764e-41	1.70446e-12	5.61407e-20	1	1	1	1
centr_pathway_ARTN.xlsx	5.51633e-43	LGG	0.883637	1.93911e-17	LGG	0.774251	1.69615e-27	LGG	0.752627	3.23192e-42	2.0865e-16	4.26616e-26	1	1	1	1
centr_pathway_AS3MT.xlsx	2.75388e-05	LGG	0.606566	0.000418251	LGG	0.622974	0.000492829	LGG	0.584215	3.48492e-05	0.000663322	0.000935759	1	1	0	0
centr_pathway_ASAH1.xlsx	2.73622e-15	LGG	0.722678	6.85574e-06	LGG	0.648312	1.2339e-08	LGG	0.645752	5.08068e-15	1.42036e-05	3.70119e-08	1	1	0	0
centr_pathway_ASAH2.xlsx	1.98449e-07	LGG	0.639872	0.00108293	LGG	0.606886	0.0405855	LGG	0.555704	2.6909e-07	0.00165235	0.0569896	1	0	0	0
centr_pathway_ASAP1.xlsx	1.63528e-53	GBM	0.935446	2.14607e-27	GBM	0.851846	1.02533e-20	GBM	0.731721	2.0191e-52	6.65819e-25	1.16188e-19	1	1	1	1
centr_pathway_ASAP2.xlsx	5.98431e-45	GBM	0.91269	2.567e-19	GBM	0.8003	1.26583e-17	GBM	0.706147	4.14682e-44	4.02397e-18	9.78617e-17	1	1	1	1
centr_pathway_ASAP3.xlsx	1.08625e-08	GBM	0.624291	1.21034e-10	GBM	0.689106	1.1115e-13	GBM	0.663965	1.54764e-08	4.16844e-10	5.51674e-13	1	1	0	0
centr_pathway_ASB1.xlsx	3.62125e-34	GBM	0.798585	5.31606e-07	GBM	0.684007	0.00219178	GBM	0.602827	1.33452e-33	1.23621e-06	0.00379131	1	1	0	0
centr_pathway_ASB10.xlsx	3.62125e-34	GBM	0.798585	5.31606e-07	GBM	0.684007	0.00219178	GBM	0.602827	1.33452e-33	1.23621e-06	0.00379131	1	1	0	0
centr_pathway_ASB11.xlsx	3.62125e-34	GBM	0.798585	5.31606e-07	GBM	0.684007	0.00219178	GBM	0.602827	1.33452e-33	1.23621e-06	0.00379131	1	1	0	0
centr_pathway_ASB12.xlsx	3.62125e-34	GBM	0.798585	5.31606e-07	GBM	0.684007	0.00219178	GBM	0.602827	1.33452e-33	1.23621e-06	0.00379131	1	1	0	0
centr_pathway_ASB13.xlsx	3.62125e-34	GBM	0.798585	5.31606e-07	GBM	0.684007	0.00219178	GBM	0.602827	1.33452e-33	1.23621e-06	0.00379131	1	1	0	0
centr_pathway_ASB14.xlsx	3.62125e-34	GBM	0.798585	5.31606e-07	GBM	0.684007	0.00219178	GBM	0.602827	1.33452e-33	1.23621e-06	0.00379131	1	1	0	0
centr_pathway_ASB15.xlsx	3.62125e-34	GBM	0.798585	5.31606e-07	GBM	0.684007	0.00219178	GBM	0.602827	1.33452e-33	1.23621e-06	0.00379131	1	1	0	0
centr_pathway_ASB16.xlsx	3.62125e-34	GBM	0.798585	5.31606e-07	GBM	0.684007	0.00219178	GBM	0.602827	1.33452e-33	1.23621e-06	0.00379131	1	1	0	0
centr_pathway_ASB17.xlsx	3.62125e-34	GBM	0.798585	5.31606e-07	GBM	0.684007	0.00219178	GBM	0.602827	1.33452e-33	1.23621e-06	0.00379131	1	1	0	0
centr_pathway_ASB18.xlsx	3.62125e-34	GBM	0.798585	5.31606e-07	GBM	0.684007	0.00219178	GBM	0.602827	1.33452e-33	1.23621e-06	0.00379131	1	1	0	0
centr_pathway_ASB2.xlsx	3.62125e-34	GBM	0.798585	5.31606e-07	GBM	0.684007	0.00219178	GBM	0.602827	1.33452e-33	1.23621e-06	0.00379131	1	1	0	0
centr_pathway_ASB3.xlsx	3.62125e-34	GBM	0.798585	5.31606e-07	GBM	0.684007	0.00219178	GBM	0.602827	1.33452e-33	1.23621e-06	0.00379131	1	1	0	0
centr_pathway_ASB4.xlsx	3.62125e-34	GBM	0.798585	5.31606e-07	GBM	0.684007	0.00219178	GBM	0.602827	1.33452e-33	1.23621e-06	0.00379131	1	1	0	0
centr_pathway_ASB5.xlsx	3.62125e-34	GBM	0.798585	5.31606e-07	GBM	0.684007	0.00219178	GBM	0.602827	1.33452e-33	1.23621e-06	0.00379131	1	1	0	0
centr_pathway_ASB6.xlsx	3.62125e-34	GBM	0.798585	5.31606e-07	GBM	0.684007	0.00219178	GBM	0.602827	1.33452e-33	1.23621e-06	0.00379131	1	1	0	0
centr_pathway_ASB7.xlsx	3.62125e-34	GBM	0.798585	5.31606e-07	GBM	0.684007	0.00219178	GBM	0.602827	1.33452e-33	1.23621e-06	0.00379131	1	1	0	0
centr_pathway_ASB8.xlsx	3.62125e-34	GBM	0.798585	5.31606e-07	GBM	0.684007	0.00219178	GBM	0.602827	1.33452e-33	1.23621e-06	0.00379131	1	1	0	0
centr_pathway_ASB9.xlsx	3.62125e-34	GBM	0.798585	5.31606e-07	GBM	0.684007	0.00219178	GBM	0.602827	1.33452e-33	1.23621e-06	0.00379131	1	1	0	0
centr_pathway_ASF1A.xlsx	1.25018e-42	GBM	0.908613	0.167588	GBM	0.535299	0.146585	GBM	0.519813	7.1507e-42	0.194674	0.179998	1	0	0	0
centr_pathway_ASGR1.xlsx	2.99068e-11	LGG	0.672412	0.000142683	LGG	0.620602	2.22284e-08	LGG	0.615845	4.9035e-11	0.00023604	6.49492e-08	1	1	0	0
centr_pathway_ASGR2.xlsx	0.000716737	GBM	0.579708	0.781054	LGG	0.508578	0.623472	GBM	0.547064	0.000858292	0.804245	0.66235	0	0	0	0
centr_pathway_ASH2L.xlsx	1.67753e-42	GBM	0.908801	1.78849e-13	GBM	0.751127	0.000145933	GBM	0.695804	9.50051e-42	9.33226e-13	0.000294997	1	1	0	0
centr_pathway_ASIP.xlsx	5.3835e-64	GBM	0.889508	9.49054e-08	GBM	0.681971	2.35954e-11	GBM	0.65761	1.77941e-62	2.44014e-07	9.33908e-11	1	1	0	0
centr_pathway_ASL.xlsx	1.83781e-17	GBM	0.737593	0.000629019	GBM	0.619298	0.017048	GBM	0.585493	3.71743e-17	0.000980259	0.0259289	1	1	0	0
centr_pathway_ASMT.xlsx	3.30504e-07	GBM	0.63444	0.00635354	LGG	0.585698	0.0854025	LGG	0.540899	4.4476e-07	0.00885459	0.108911	0	0	0	0
centr_pathway_ASNS.xlsx	1.39745e-08	GBM	0.642707	0.575288	GBM	0.527393	0.00499069	GBM	0.565422	1.98572e-08	0.610372	0.00822939	1	0	0	0
centr_pathway_ASPA.xlsx	2.0828e-07	GBM	0.626813	0.930785	LGG	0.5	0.0105563	GBM	0.555096	2.82165e-07	0.939109	0.0165421	0	0	0	0
centr_pathway_ASPG.xlsx	6.04516e-28	LGG	0.77105	3.86442e-12	LGG	0.719227	1.18811e-11	LGG	0.653105	1.71832e-27	1.61745e-11	4.87894e-11	1	1	0	0
centr_pathway_ASPH.xlsx	0.00919632	GBM	0.571115	1.60686e-06	GBM	0.657799	1.38153e-09	GBM	0.629987	0.0104228	3.58331e-06	4.56322e-09	1	1	0	0
centr_pathway_ASPSCR1.xlsx	4.86256e-53	LGG	0.84801	0.0087307	LGG	0.60234	1.81561e-07	LGG	0.611874	5.75647e-52	0.0119804	4.85882e-07	1	1	0	0
centr_pathway_ASRGL1.xlsx	6.04516e-28	LGG	0.77105	3.86442e-12	LGG	0.719227	1.18811e-11	LGG	0.653105	1.71832e-27	1.61745e-11	4.87894e-11	1	1	0	0
centr_pathway_ASS1.xlsx	2.67954e-08	GBM	0.638241	0.27586	GBM	0.545616	0.00231244	GBM	0.571632	3.77236e-08	0.309252	0.00399075	1	0	0	0
centr_pathway_ATAD1.xlsx	1.0251e-45	LGG	0.904172	2.18475e-18	LGG	0.79781	1.07411e-20	LGG	0.71893	7.49263e-45	2.85693e-17	1.21532e-19	1	1	1	1
centr_pathway_ATF1.xlsx	6.20909e-35	LGG	0.813776	0.00557539	LGG	0.58977	0.026404	LGG	0.552222	2.44889e-34	0.00782699	0.0384091	1	1	0	0
centr_pathway_ATF2.xlsx	0.0247285	GBM	0.549011	1.32052e-05	LGG	0.640327	0.268326	GBM	0.505118	0.0276117	2.4606e-05	0.312969	0	0	0	0
centr_pathway_ATF3.xlsx	1.42713e-13	LGG	0.680955	0.218946	LGG	0.532414	0.401714	LGG	0.524844	2.50838e-13	0.249735	0.449603	1	0	0	0
centr_pathway_ATF4.xlsx	1.60228e-37	LGG	0.832618	3.7377e-11	LGG	0.708198	0.000685929	LGG	0.593834	7.0697e-37	1.36627e-10	0.00128053	1	1	0	0
centr_pathway_ATF5.xlsx	2.13578e-18	LGG	0.721499	0.342517	LGG	0.520357	0.0465562	LGG	0.551506	4.46274e-18	0.378451	0.0647025	1	0	0	0
centr_pathway_ATF6.xlsx	1.05841e-12	LGG	0.687767	0.563889	LGG	0.507629	0.720961	LGG	0.511645	1.81672e-12	0.599731	0.754188	1	0	0	0
centr_pathway_ATF6B.xlsx	3.56181e-49	LGG	0.854233	3.93538e-15	LGG	0.751522	2.50507e-05	LGG	0.596454	3.1302e-48	2.73602e-14	5.44536e-05	1	1	0	0
centr_pathway_ATF7.xlsx	5.02453e-37	LGG	0.831414	0.000671772	LGG	0.610878	2.0713e-06	LGG	0.613932	2.17458e-36	0.00104339	4.95686e-06	1	1	0	0
centr_pathway_ATG10.xlsx	5.08518e-23	GBM	0.783519	0.592416	LGG	0.509645	0.0588873	GBM	0.553455	1.22576e-22	0.627562	0.0770638	0	0	0	0
centr_pathway_ATG101.xlsx	8.03845e-14	LGG	0.69434	8.48142e-08	LGG	0.681556	1.74801e-08	LGG	0.642235	1.42528e-13	2.1928e-07	5.15402e-08	1	1	0	0
centr_pathway_ATG12.xlsx	0.688799	GBM	0.504353	0.0781008	LGG	0.539213	0.0197001	GBM	0.545333	0.70253	0.0950692	0.0294041	0	0	0	0
centr_pathway_ATG13.xlsx	5.00255e-23	LGG	0.773697	3.59252e-08	LGG	0.688829	2.10009e-13	LGG	0.667165	1.20623e-22	9.57748e-08	1.00937e-12	1	1	0	0
centr_pathway_ATG16L1.xlsx	2.53895e-22	GBM	0.785125	0.160532	GBM	0.558186	5.22266e-05	GBM	0.609825	5.99431e-22	0.187149	0.000110212	1	0	0	0
centr_pathway_ATG16L2.xlsx	0.0673348	LGG	0.56113	0.457875	LGG	0.527907	0.0121539	LGG	0.56457	0.0735905	0.496048	0.0189301	1	0	0	0
centr_pathway_ATG3.xlsx	2.17983e-14	GBM	0.71194	0.22401	GBM	0.532058	0.0146859	GBM	0.550745	3.94939e-14	0.255238	0.0226416	1	0	0	0
centr_pathway_ATG5.xlsx	0.121942	GBM	0.537245	0.562457	LGG	0.516642	0.0222105	GBM	0.550591	0.131767	0.598294	0.0327946	0	0	0	0
centr_pathway_ATG7.xlsx	2.19863e-34	GBM	0.877038	5.93763e-10	GBM	0.701478	0.876864	LGG	0.536086	8.43974e-34	1.88858e-09	0.897724	0	0	0	0
centr_pathway_ATIC.xlsx	1.24368e-22	GBM	0.758355	1.72495e-07	GBM	0.654874	0.000682105	GBM	0.585203	2.96151e-22	4.29421e-07	0.00127403	1	1	0	0
centr_pathway_ATM.xlsx	1.80692e-36	GBM	0.836607	1.84759e-12	GBM	0.746897	1.3006e-08	GBM	0.671843	7.62151e-36	8.09721e-12	3.89029e-08	1	1	0	0
centr_pathway_ATOX1.xlsx	1.66094e-45	GBM	0.853229	5.35241e-07	GBM	0.664558	6.05448e-06	GBM	0.61609	1.19415e-44	1.24311e-06	1.39639e-05	1	1	0	0
centr_pathway_ATP1A1.xlsx	9.0074e-40	LGG	0.846618	8.01306e-14	LGG	0.745039	1.6171e-08	LGG	0.639769	4.50069e-39	4.41638e-13	4.77749e-08	1	1	0	0
centr_pathway_ATP1A2.xlsx	9.0074e-40	LGG	0.846618	8.01306e-14	LGG	0.745039	1.6171e-08	LGG	0.639769	4.50069e-39	4.41638e-13	4.77749e-08	1	1	0	0
centr_pathway_ATP1A3.xlsx	9.0074e-40	LGG	0.846618	8.01306e-14	LGG	0.745039	1.6171e-08	LGG	0.639769	4.50069e-39	4.41638e-13	4.77749e-08	1	1	0	0
centr_pathway_ATP1A4.xlsx	9.0074e-40	LGG	0.846618	8.01306e-14	LGG	0.745039	1.6171e-08	LGG	0.639769	4.50069e-39	4.41638e-13	4.77749e-08	1	1	0	0
centr_pathway_ATP1B1.xlsx	7.89533e-39	LGG	0.848801	1.47099e-14	LGG	0.753696	1.19323e-09	LGG	0.653993	3.70466e-38	9.38283e-14	3.95881e-09	1	1	0	0
centr_pathway_ATP1B2.xlsx	7.89533e-39	LGG	0.848801	1.47099e-14	LGG	0.753696	1.19323e-09	LGG	0.653993	3.70466e-38	9.38283e-14	3.95881e-09	1	1	0	0
centr_pathway_ATP1B3.xlsx	7.89533e-39	LGG	0.848801	1.47099e-14	LGG	0.753696	1.19323e-09	LGG	0.653993	3.70466e-38	9.38283e-14	3.95881e-09	1	1	0	0
centr_pathway_ATP1B4.xlsx	2.49025e-38	LGG	0.842278	1.37469e-14	LGG	0.752312	9.41243e-09	LGG	0.638989	1.14264e-37	8.85156e-14	2.8486e-08	1	1	0	0
centr_pathway_ATP2A1.xlsx	0.428204	LGG	0.500201	0.0980859	GBM	0.574196	0.0948064	GBM	0.546112	0.445251	0.117893	0.12004	0	0	0	0
centr_pathway_ATP2A2.xlsx	0.161754	LGG	0.526482	0.00021747	GBM	0.612894	0.330246	GBM	0.521544	0.173458	0.000352861	0.37606	0	0	0	0
centr_pathway_ATP2A3.xlsx	0.376033	GBM	0.546365	0.029666	GBM	0.590205	0.0143357	GBM	0.562095	0.393413	0.0380195	0.0221292	1	0	0	0
centr_pathway_ATP2B1.xlsx	7.06891e-46	LGG	0.849629	3.11062e-09	LGG	0.688355	0.00814352	LGG	0.563845	5.20244e-45	9.21676e-09	0.0129853	1	1	0	0
centr_pathway_ATP2B2.xlsx	1.04169e-56	LGG	0.894162	8.52186e-20	LGG	0.794411	9.13839e-13	LGG	0.669967	1.76051e-55	1.46884e-18	4.14597e-12	1	1	0	0
centr_pathway_ATP2B3.xlsx	8.70754e-52	LGG	0.880062	4.93164e-18	LGG	0.783856	5.43946e-10	LGG	0.654183	9.20019e-51	6.00998e-17	1.86449e-09	1	1	0	0
centr_pathway_ATP2B4.xlsx	2.80705e-51	LGG	0.878494	6.2386e-17	LGG	0.765752	2.69859e-06	LGG	0.610895	2.87636e-50	6.13641e-16	6.39027e-06	1	1	0	0
centr_pathway_ATP2C1.xlsx	8.33086e-09	LGG	0.646081	0.362478	LGG	0.522373	0.104546	GBM	0.531616	1.19217e-08	0.39879	0.131544	0	0	0	0
centr_pathway_ATP4A.xlsx	0.000231196	GBM	0.603235	0.0299317	LGG	0.545241	0.556913	LGG	0.518816	0.000282057	0.0383138	0.601948	0	0	0	0
centr_pathway_ATP4B.xlsx	0.000231196	GBM	0.603235	0.0299317	LGG	0.545241	0.556913	LGG	0.518816	0.000282057	0.0383138	0.601948	0	0	0	0
centr_pathway_ATP5A1.xlsx	0.00699146	GBM	0.562735	0.000989325	LGG	0.601194	0.00112321	LGG	0.574107	0.00799789	0.00151481	0.00204108	0	1	0	0
centr_pathway_ATP5B.xlsx	0.53742	GBM	0.518679	0.00579454	LGG	0.584473	0.000216876	LGG	0.580743	0.553652	0.00811781	0.000430112	0	0	0	0
centr_pathway_ATP5C1.xlsx	0.00699146	GBM	0.562735	0.000989325	LGG	0.601194	0.00112321	LGG	0.574107	0.00799789	0.00151481	0.00204108	0	1	0	0
centr_pathway_ATP5D.xlsx	0.00699146	GBM	0.562735	0.000989325	LGG	0.601194	0.00112321	LGG	0.574107	0.00799789	0.00151481	0.00204108	0	1	0	0
centr_pathway_ATP5E.xlsx	0.00699146	GBM	0.562735	0.000989325	LGG	0.601194	0.00112321	LGG	0.574107	0.00799789	0.00151481	0.00204108	0	1	0	0
centr_pathway_ATP5F1.xlsx	0.00699146	GBM	0.562735	0.000989325	LGG	0.601194	0.00112321	LGG	0.574107	0.00799789	0.00151481	0.00204108	0	1	0	0
centr_pathway_ATP5F1A.xlsx	1.35288e-23	LGG	0.771552	1.41922e-13	LGG	0.74077	0.000380051	LGG	0.60309	3.32543e-23	7.56444e-13	0.000729247	1	1	0	0
centr_pathway_ATP5F1B.xlsx	1.35288e-23	LGG	0.771552	1.41922e-13	LGG	0.74077	0.000380051	LGG	0.60309	3.32543e-23	7.56444e-13	0.000729247	1	1	0	0
centr_pathway_ATP5F1C.xlsx	1.35288e-23	LGG	0.771552	1.41922e-13	LGG	0.74077	0.000380051	LGG	0.60309	3.32543e-23	7.56444e-13	0.000729247	1	1	0	0
centr_pathway_ATP5F1D.xlsx	1.35288e-23	LGG	0.771552	1.41922e-13	LGG	0.74077	0.000380051	LGG	0.60309	3.32543e-23	7.56444e-13	0.000729247	1	1	0	0
centr_pathway_ATP5F1E.xlsx	1.35288e-23	LGG	0.771552	1.41922e-13	LGG	0.74077	0.000380051	LGG	0.60309	3.32543e-23	7.56444e-13	0.000729247	1	1	0	0
centr_pathway_ATP5F1EP2.ATP5EP2.xlsx	1.35288e-23	LGG	0.771552	1.41922e-13	LGG	0.74077	0.000380051	LGG	0.60309	3.32543e-23	7.56444e-13	0.000729247	1	1	0	0
centr_pathway_ATP5G2.xlsx	0.00699146	GBM	0.562735	0.000989325	LGG	0.601194	0.00112321	LGG	0.574107	0.00799789	0.00151481	0.00204108	0	1	0	0
centr_pathway_ATP5ME.xlsx	1.35288e-23	LGG	0.771552	1.41922e-13	LGG	0.74077	0.000380051	LGG	0.60309	3.32543e-23	7.56444e-13	0.000729247	1	1	0	0
centr_pathway_ATP5MF.xlsx	1.35288e-23	LGG	0.771552	1.41922e-13	LGG	0.74077	0.000380051	LGG	0.60309	3.32543e-23	7.56444e-13	0.000729247	1	1	0	0
centr_pathway_ATP5MG.xlsx	1.35288e-23	LGG	0.771552	1.41922e-13	LGG	0.74077	0.000380051	LGG	0.60309	3.32543e-23	7.56444e-13	0.000729247	1	1	0	0
centr_pathway_ATP5MGL.xlsx	1.35288e-23	LGG	0.771552	1.41922e-13	LGG	0.74077	0.000380051	LGG	0.60309	3.32543e-23	7.56444e-13	0.000729247	1	1	0	0
centr_pathway_ATP5PB.xlsx	1.35288e-23	LGG	0.771552	1.41922e-13	LGG	0.74077	0.000380051	LGG	0.60309	3.32543e-23	7.56444e-13	0.000729247	1	1	0	0
centr_pathway_ATP5PD.xlsx	1.35288e-23	LGG	0.771552	1.41922e-13	LGG	0.74077	0.000380051	LGG	0.60309	3.32543e-23	7.56444e-13	0.000729247	1	1	0	0
centr_pathway_ATP6.xlsx	1.35288e-23	LGG	0.771552	1.41922e-13	LGG	0.74077	0.000380051	LGG	0.60309	3.32543e-23	7.56444e-13	0.000729247	1	1	0	0
centr_pathway_ATP6AP1.xlsx	1.6466e-47	LGG	0.863227	3.92758e-15	LGG	0.763143	5.5595e-13	LGG	0.696629	1.33407e-46	2.73571e-14	2.58529e-12	1	1	0	0
centr_pathway_ATP6AP2.xlsx	0.816643	LGG	0.523132	0.000478744	LGG	0.629378	0.944233	LGG	0.508472	0.822922	0.00075636	0.955008	1	0	0	0
centr_pathway_ATP6V1B1.xlsx	0.128655	GBM	0.549287	0.0171339	GBM	0.587517	0.0824152	LGG	0.537853	0.13894	0.0228391	0.105209	0	0	0	0
centr_pathway_ATP6V1H.xlsx	1.43025e-19	GBM	0.74438	0.000107858	GBM	0.625267	0.347922	GBM	0.524382	3.10581e-19	0.000180353	0.394559	1	0	0	0
centr_pathway_ATP7A.xlsx	1.66094e-45	GBM	0.853229	5.35241e-07	GBM	0.664558	6.05448e-06	GBM	0.61609	1.19415e-44	1.24311e-06	1.39639e-05	1	1	0	0
centr_pathway_ATP8.xlsx	1.35288e-23	LGG	0.771552	1.41922e-13	LGG	0.74077	0.000380051	LGG	0.60309	3.32543e-23	7.56444e-13	0.000729247	1	1	0	0
centr_pathway_ATR.xlsx	4.2934e-53	GBM	0.879773	5.38817e-14	GBM	0.753459	5.70968e-16	GBM	0.707344	5.13969e-52	3.06496e-13	3.75186e-15	1	1	1	1
centr_pathway_ATRIP.xlsx	1.51929e-59	GBM	0.892418	3.79858e-16	GBM	0.770891	7.63654e-22	GBM	0.730887	3.61436e-58	3.23248e-15	9.87049e-21	1	1	1	1
centr_pathway_ATXN1.xlsx	1.46239e-20	GBM	0.747566	4.22403e-06	GBM	0.645308	0.914653	GBM	0.50383	3.25799e-20	9.01724e-06	0.929383	1	0	0	0
centr_pathway_ATXN10.xlsx	6.25984e-07	GBM	0.668762	4.31591e-12	GBM	0.717606	0.00639417	GBM	0.570997	8.35763e-07	1.79032e-11	0.0103248	1	1	0	0
centr_pathway_ATXN2.xlsx	3.4029e-13	GBM	0.697815	0.0010629	GBM	0.622025	0.0147534	GBM	0.558822	5.91155e-13	0.00162278	0.0227269	1	1	0	0
centr_pathway_ATXN3.xlsx	4.33053e-19	GBM	0.770937	0.0028707	GBM	0.593446	0.283482	GBM	0.51945	9.22676e-19	0.00417159	0.329512	1	0	0	0
centr_pathway_ATXN7.xlsx	1.16057e-21	GBM	0.771175	2.50929e-09	GBM	0.688671	0.224062	GBM	0.527038	2.67081e-21	7.5067e-09	0.265925	1	0	0	0
centr_pathway_AUH.xlsx	1.33875e-67	GBM	0.90717	4.10489e-31	GBM	0.844889	8.99033e-13	GBM	0.682522	6.32942e-66	5.09417e-28	4.08377e-12	1	1	0	0
centr_pathway_AURKA.xlsx	3.08558e-25	GBM	0.7783	2.28508e-13	GBM	0.744802	4.07143e-18	GBM	0.710318	8.04233e-25	1.17749e-12	3.50425e-17	1	1	1	1
centr_pathway_AURKAIP1.xlsx	6.19902e-26	GBM	0.790105	8.36648e-12	GBM	0.719266	0.234335	GBM	0.545142	1.66212e-25	3.33316e-11	0.276793	1	0	0	0
centr_pathway_AURKB.xlsx	1.6963e-75	GBM	0.907045	1.29629e-17	GBM	0.77686	7.33159e-26	GBM	0.748012	2.18472e-73	1.43425e-16	1.46337e-24	1	1	1	1
centr_pathway_AURKC.xlsx	1.21919e-47	GBM	0.83874	4.42485e-17	GBM	0.770891	5.46226e-17	GBM	0.70166	9.9643e-47	4.47656e-16	3.95974e-16	1	1	1	1
centr_pathway_AVP.xlsx	8.87488e-06	GBM	0.631994	0.797162	LGG	0.504427	0.496313	LGG	0.504546	1.14138e-05	0.818992	0.54339	0	0	0	0
centr_pathway_AVPR1A.xlsx	1.24129e-11	GBM	0.685872	0.36786	GBM	0.539134	0.88929	GBM	0.523185	2.06099e-11	0.404114	0.907949	1	0	0	0
centr_pathway_AVPR1B.xlsx	1.24129e-11	GBM	0.685872	0.36786	GBM	0.539134	0.88929	GBM	0.523185	2.06099e-11	0.404114	0.907949	1	0	0	0
centr_pathway_AVPR2.xlsx	5.13919e-06	GBM	0.625684	0.670066	GBM	0.516918	0.610267	LGG	0.510013	6.66142e-06	0.701238	0.649805	0	0	0	0
centr_pathway_AWAT1.xlsx	0.000784722	LGG	0.581075	0.851294	GBM	0.505099	0.00207878	LGG	0.55758	0.000937449	0.867607	0.00365702	0	0	0	0
centr_pathway_AWAT2.xlsx	2.8961e-08	GBM	0.63789	0.0153782	LGG	0.58392	0.536371	GBM	0.511744	4.07495e-08	0.0206169	0.582366	0	0	0	0
centr_pathway_AXIN1.xlsx	3.9824e-21	GBM	0.76272	0.00122784	GBM	0.62333	0.334895	GBM	0.545006	9.01744e-21	0.00185333	0.381121	1	0	0	0
centr_pathway_AXIN2.xlsx	8.8733e-58	LGG	0.928321	2.1815e-19	LGG	0.785596	1.88934e-11	LGG	0.647139	1.67383e-56	3.45605e-18	7.54623e-11	1	1	0	0
centr_pathway_AXL.xlsx	1.53754e-27	GBM	0.805685	3.34916e-05	GBM	0.63926	6.1387e-11	GBM	0.661155	4.32271e-27	5.91318e-05	2.31406e-10	1	1	0	0
centr_pathway_AZI2.xlsx	0.000576282	LGG	0.607293	0.0274987	GBM	0.552178	0.312725	LGG	0.529005	0.00069254	0.035878	0.36052	0	0	0	0
centr_pathway_AZIN1.xlsx	3.34976e-17	GBM	0.755281	0.073082	GBM	0.571547	0.366992	LGG	0.514355	6.72292e-17	0.0892079	0.414292	0	0	0	0
centr_pathway_AZIN2.xlsx	3.79996e-12	GBM	0.678308	0.0103239	GBM	0.598111	4.88798e-10	GBM	0.645562	6.40761e-12	0.0140894	1.6801e-09	1	1	0	0
centr_pathway_B2M.xlsx	1.01142e-24	GBM	0.780759	6.4756e-12	GBM	0.720294	2.45371e-14	GBM	0.678117	2.57772e-24	2.62765e-11	1.33439e-13	1	1	0	0
centr_pathway_B3GALNT1.xlsx	1.85673e-36	GBM	0.817515	1.17794e-10	GBM	0.713772	3.26093e-24	GBM	0.736871	7.82719e-36	4.06064e-10	5.49268e-23	1	1	1	1
centr_pathway_B3GALT1.xlsx	5.24484e-31	GBM	0.767186	7.35108e-14	GBM	0.740533	4.09161e-09	GBM	0.641582	1.67718e-30	4.07566e-13	1.28478e-08	1	1	0	0
centr_pathway_B3GALT2.xlsx	1.10739e-06	GBM	0.611232	9.80833e-06	GBM	0.639418	0.000809734	GBM	0.582311	1.46696e-06	1.98686e-05	0.00149962	1	1	0	0
centr_pathway_B3GALT4.xlsx	1.10606e-17	GBM	0.743866	9.16836e-10	GBM	0.696458	1.37246e-07	GBM	0.622046	2.24897e-17	2.86117e-09	3.71967e-07	1	1	0	0
centr_pathway_B3GALT5.xlsx	1.91389e-47	GBM	0.829281	3.87163e-15	GBM	0.749545	1.47523e-19	GBM	0.710943	1.54559e-46	2.70433e-14	1.52121e-18	1	1	1	1
centr_pathway_B3GALT6.xlsx	1.40727e-25	GBM	0.785112	7.36463e-09	GBM	0.691952	4.10356e-06	GBM	0.623433	3.71722e-25	2.09142e-08	9.60723e-06	1	1	0	0
centr_pathway_B3GAT3.xlsx	1.5937e-06	LGG	0.633072	0.176328	LGG	0.555538	9.31177e-05	LGG	0.577969	2.10224e-06	0.204031	0.000192146	1	0	0	0
centr_pathway_B3GNT2.xlsx	3.98377e-09	GBM	0.663819	9.47757e-08	GBM	0.672583	4.84558e-05	GBM	0.615065	5.75717e-09	2.43765e-07	0.000102516	1	1	0	0
centr_pathway_B3GNT3.xlsx	2.14096e-08	GBM	0.655038	1.65521e-08	GBM	0.685113	2.33987e-05	GBM	0.61628	3.02153e-08	4.54618e-08	5.1056e-05	1	1	0	0
centr_pathway_B3GNT4.xlsx	8.29734e-08	GBM	0.645253	4.83321e-08	GBM	0.672267	1.0426e-05	GBM	0.622472	1.13664e-07	1.27256e-07	2.35431e-05	1	1	0	0
centr_pathway_B3GNT5.xlsx	8.04156e-06	GBM	0.634628	6.14982e-09	GBM	0.68709	0.00667768	GBM	0.580416	1.03695e-05	1.76257e-08	0.0107586	1	1	0	0
centr_pathway_B3GNT6.xlsx	0.00684288	LGG	0.564479	0.00745146	LGG	0.58218	0.00101119	LGG	0.571831	0.00783632	0.0103168	0.00185108	1	1	0	0
centr_pathway_B3GNT7.xlsx	2.85073e-21	GBM	0.759672	1.73152e-09	GBM	0.693968	4.24829e-10	GBM	0.662642	6.48642e-21	5.27749e-09	1.467e-09	1	1	0	0
centr_pathway_B3GNT8.xlsx	4.42842e-05	GBM	0.619499	2.39377e-07	GBM	0.666851	0.0200355	GBM	0.569103	5.56907e-05	5.86895e-07	0.0298746	1	1	0	0
centr_pathway_B3GNT9.xlsx	0.00281254	GBM	0.590145	9.79602e-07	GBM	0.653135	0.0217903	GBM	0.566646	0.00327866	2.22314e-06	0.0322202	1	1	0	0
centr_pathway_B3GNTL1.xlsx	0.0643947	GBM	0.560828	1.78985e-06	GBM	0.651119	0.602018	GBM	0.523811	0.0704493	3.96525e-06	0.642831	1	0	0	0
centr_pathway_B4GALNT1.xlsx	1.25249e-07	GBM	0.645592	0.190661	GBM	0.548858	0.0359751	GBM	0.553202	1.70701e-07	0.219277	0.0511134	1	0	0	0
centr_pathway_B4GALT1.xlsx	0.583557	GBM	0.516095	0.827964	LGG	0.508657	0.267105	GBM	0.531362	0.599281	0.846843	0.311643	0	0	0	0
centr_pathway_B4GALT2.xlsx	8.64761e-06	LGG	0.604371	0.00144397	LGG	0.605265	0.642531	LGG	0.504329	1.11279e-05	0.002159	0.681334	1	0	0	0
centr_pathway_B4GALT3.xlsx	1.39541e-10	LGG	0.678985	5.57047e-13	LGG	0.737529	2.81734e-08	LGG	0.655008	2.22919e-10	2.75051e-12	8.16787e-08	1	1	0	0
centr_pathway_B4GALT4.xlsx	1.11609e-09	LGG	0.646069	0.143296	LGG	0.542652	0.241007	LGG	0.513821	1.64733e-09	0.168081	0.284088	1	0	0	0
centr_pathway_B4GALT5.xlsx	5.03593e-06	GBM	0.631228	1.72248e-11	GBM	0.714049	2.84807e-06	GBM	0.626551	6.53097e-06	6.56712e-11	6.73354e-06	1	1	0	0
centr_pathway_B4GALT6.xlsx	0.0287822	GBM	0.56966	4.62824e-07	GBM	0.657167	0.152229	GBM	0.545523	0.0320135	1.1049e-06	0.186559	1	0	0	0
centr_pathway_B4GALT7.xlsx	9.18931e-17	GBM	0.735285	2.58831e-07	GBM	0.67199	8.1348e-05	GBM	0.609399	1.81935e-16	6.33132e-07	0.000168466	1	1	0	0
centr_pathway_B4GAT1.xlsx	5.39305e-08	GBM	0.647022	1.64112e-05	GBM	0.649696	3.66539e-06	GBM	0.62831	7.44935e-08	3.02347e-05	8.61118e-06	1	1	0	0
centr_pathway_B9D2.xlsx	3.02808e-54	GBM	0.868847	1.37216e-12	GBM	0.73239	1.10602e-17	GBM	0.708504	4.0035e-53	6.15119e-12	8.64045e-17	1	1	1	1
centr_pathway_BAAT.xlsx	1.53741e-13	LGG	0.693537	0.0408724	LGG	0.559649	0.00033687	LGG	0.575992	2.69905e-13	0.0515125	0.000654317	1	0	0	0
centr_pathway_BACH1.xlsx	5.16952e-44	GBM	0.830185	3.22247e-13	GBM	0.739466	1.27156e-11	GBM	0.713273	3.33187e-43	1.63117e-12	5.19864e-11	1	1	1	1
centr_pathway_BAD.xlsx	0.000130926	LGG	0.613026	0.00810783	GBM	0.58558	0.968455	GBM	0.514156	0.000161442	0.0111736	0.975531	0	0	0	0
centr_pathway_BAG4.xlsx	1.49452e-19	GBM	0.746952	0.000222467	GBM	0.619298	5.96576e-15	GBM	0.68255	3.24253e-19	0.000360733	3.50277e-14	1	1	0	0
centr_pathway_BAIAP2.xlsx	3.78495e-48	LGG	0.87182	1.48221e-18	LGG	0.787414	9.58757e-18	LGG	0.7134	3.16968e-47	2.0103e-17	7.86117e-17	1	1	1	1
centr_pathway_BAK1.xlsx	1.60254e-61	GBM	0.963132	1.31839e-17	GBM	0.797454	7.4512e-18	GBM	0.706737	4.32166e-60	1.45649e-16	6.18441e-17	1	1	1	1
centr_pathway_BAMBI.xlsx	1.87714e-39	LGG	0.855286	3.41205e-19	LGG	0.772354	2.04578e-23	LGG	0.735683	9.13502e-39	5.23838e-18	3.0957e-22	1	1	1	1
centr_pathway_BANF1.xlsx	1.34899e-28	GBM	0.811042	4.18586e-13	GBM	0.745118	2.70345e-10	GBM	0.65897	3.921e-28	2.09181e-12	9.49845e-10	1	1	0	0
centr_pathway_BARD1.xlsx	8.50852e-43	GBM	0.84658	2.46266e-12	GBM	0.736738	3.71192e-12	GBM	0.673792	4.93851e-42	1.05994e-11	1.60297e-11	1	1	0	0
centr_pathway_BATF3.xlsx	4.43836e-29	GBM	0.7499	4.85666e-12	GBM	0.720255	5.97779e-29	GBM	0.752246	1.30942e-28	2.00126e-11	1.78019e-27	1	1	1	1
centr_pathway_BAX.xlsx	5.36504e-59	GBM	0.955981	1.05628e-20	GBM	0.819828	1.11132e-17	GBM	0.70185	1.17184e-57	2.2031e-19	8.66361e-17	1	1	1	1
centr_pathway_BAZ2A.xlsx	9.76034e-43	GBM	0.912251	5.26263e-18	GBM	0.793264	1.69097e-05	GBM	0.737043	5.62575e-42	6.32025e-17	3.74459e-05	1	1	1	1
centr_pathway_BBC3.xlsx	9.48814e-06	GBM	0.620101	7.18083e-06	GBM	0.637877	0.674792	LGG	0.507184	1.21969e-05	1.48317e-05	0.711187	0	0	0	0
centr_pathway_BBOX1.xlsx	0.878334	LGG	0.510613	3.33259e-05	LGG	0.645901	0.0195491	LGG	0.564633	0.882587	5.88718e-05	0.0291962	1	0	0	0
centr_pathway_BCAN.xlsx	0.00152451	GBM	0.592127	0.131003	GBM	0.574117	0.215422	GBM	0.539748	0.0018002	0.154417	0.256241	1	0	0	0
centr_pathway_BCAP31.xlsx	0.313787	LGG	0.523935	0.400742	LGG	0.52178	0.00816358	GBM	0.55642	0.330698	0.438232	0.0130145	0	0	0	0
centr_pathway_BCAR1.xlsx	6.1674e-16	GBM	0.718839	5.31399e-10	GBM	0.706617	8.81595e-19	GBM	0.703201	1.16575e-15	1.69893e-09	8.27676e-18	1	1	1	1
centr_pathway_BCAR3.xlsx	1.46045e-19	GBM	0.736414	0.000125015	GBM	0.622105	2.94727e-06	GBM	0.601458	3.17046e-19	0.000207642	6.96364e-06	1	1	0	0
centr_pathway_BCAS2.xlsx	4.52967e-08	GBM	0.650835	1.09961e-12	GBM	0.724919	0.318585	GBM	0.549122	6.28001e-08	5.06038e-12	0.363448	1	0	0	0
centr_pathway_BCAT1.xlsx	1.46236e-64	GBM	0.903081	7.70149e-23	GBM	0.812989	1.24794e-38	GBM	0.788808	4.96538e-63	3.08308e-21	3.73016e-36	1	1	1	1
centr_pathway_BCAT2.xlsx	1.46236e-64	GBM	0.903081	7.70149e-23	GBM	0.812989	1.24794e-38	GBM	0.788808	4.96538e-63	3.08308e-21	3.73016e-36	1	1	1	1
centr_pathway_BCHE.xlsx	0.451654	GBM	0.515731	0.0400526	LGG	0.581232	0.112398	LGG	0.543964	0.468461	0.0505221	0.140948	0	0	0	0
centr_pathway_BCKDHA.xlsx	8.4902e-17	GBM	0.718752	0.00733865	GBM	0.595976	2.15464e-06	GBM	0.605691	1.68406e-16	0.0101719	5.14145e-06	1	1	0	0
centr_pathway_BCKDHB.xlsx	4.69927e-26	GBM	0.777711	9.75076e-08	GBM	0.67618	1.81485e-06	GBM	0.613932	1.2659e-25	2.50532e-07	4.37834e-06	1	1	0	0
centr_pathway_BCL10.xlsx	0.00333826	LGG	0.58312	0.123541	GBM	0.553087	0.00126768	GBM	0.564833	0.00388303	0.146618	0.00228908	0	0	0	0
centr_pathway_BCL2.xlsx	3.34453e-15	LGG	0.706684	0.00477887	LGG	0.587675	5.30694e-08	LGG	0.633242	6.18713e-15	0.00676749	1.49208e-07	1	1	0	0
centr_pathway_BCL2A1.xlsx	4.20998e-13	GBM	0.703247	2.21109e-06	GBM	0.646573	0.00298183	GBM	0.580081	7.29496e-13	4.85228e-06	0.00509168	1	1	0	0
centr_pathway_BCL2L1.xlsx	8.19907e-66	LGG	0.952368	1.86316e-21	LGG	0.816033	2.53644e-12	LGG	0.661536	3.09329e-64	4.609e-20	1.11081e-11	1	1	0	0
centr_pathway_BCL2L11.xlsx	0.220152	LGG	0.536254	0.148403	LGG	0.552376	1.75634e-07	LGG	0.624122	0.23413	0.173743	4.71376e-07	1	0	0	0
centr_pathway_BCL2L2.xlsx	4.20998e-13	GBM	0.703247	2.21109e-06	GBM	0.646573	0.00298183	GBM	0.580081	7.29496e-13	4.85228e-06	0.00509168	1	1	0	0
centr_pathway_BCL3.xlsx	3.96635e-25	GBM	0.778037	6.71987e-10	GBM	0.71057	2.42785e-23	GBM	0.729455	1.02699e-24	2.12378e-09	3.6664e-22	1	1	1	1
centr_pathway_BCL6.xlsx	9.27203e-38	LGG	0.864632	0.0194559	LGG	0.563641	1.90729e-05	LGG	0.597995	4.13505e-37	0.0257957	4.19738e-05	1	1	0	0
centr_pathway_BCL9.xlsx	1.67753e-42	GBM	0.908801	1.78849e-13	GBM	0.751127	0.000145933	GBM	0.695804	9.50051e-42	9.33226e-13	0.000294997	1	1	0	0
centr_pathway_BCL9L.xlsx	1.67753e-42	GBM	0.908801	1.78849e-13	GBM	0.751127	0.000145933	GBM	0.695804	9.50051e-42	9.33226e-13	0.000294997	1	1	0	0
centr_pathway_BCMO1.xlsx	#NUM!	GBM	0.5	0.231699	LGG	0.550162	0.205656	GBM	0.528054	#NUM!	0.263233	0.245409	0	0	0	0
centr_pathway_BCO1.xlsx	7.56638e-07	GBM	0.626888	0.000121719	LGG	0.630524	0.0127861	LGG	0.567144	1.00768e-06	0.000202394	0.0198524	0	1	0	0
centr_pathway_BCOR.xlsx	1.13065e-31	LGG	0.853668	3.85681e-05	LGG	0.656574	7.98418e-11	LGG	0.659695	3.73548e-31	6.76668e-05	2.97509e-10	1	1	0	0
centr_pathway_BCR.ABL1.xlsx	4.1627e-44	LGG	0.877841	2.55064e-08	LGG	0.693454	0.318301	LGG	0.524862	2.7016e-43	6.89617e-08	0.363448	1	0	0	0
centr_pathway_BCR.xlsx	0.00222111	GBM	0.579382	0.0222595	GBM	0.580243	1.64968e-05	GBM	0.596979	0.00260262	0.0293042	3.66405e-05	1	1	0	0
centr_pathway_BDH1.xlsx	6.05081e-15	LGG	0.691329	1.60416e-05	LGG	0.634556	0.0354651	LGG	0.554879	1.11137e-14	2.95658e-05	0.0504178	1	0	0	0
centr_pathway_BDH2.xlsx	6.05081e-15	LGG	0.691329	1.60416e-05	LGG	0.634556	0.0354651	LGG	0.554879	1.11137e-14	2.95658e-05	0.0504178	1	0	0	0
centr_pathway_BDKRB1.xlsx	1.23725e-09	GBM	0.65993	0.787534	GBM	0.519685	0.81263	LGG	0.518263	1.8215e-09	0.809758	0.838768	0	0	0	0
centr_pathway_BDKRB2.xlsx	1.40707e-15	GBM	0.706859	0.240364	GBM	0.553285	0.701166	GBM	0.53187	2.63296e-15	0.272372	0.735963	1	0	0	0
centr_pathway_BDNF.xlsx	1.3954e-06	GBM	0.627427	0.0424076	GBM	0.568622	1.56252e-06	GBM	0.599055	1.84326e-06	0.053366	3.7979e-06	1	0	0	0
centr_pathway_BDP1.xlsx	3.48098e-11	LGG	0.688833	0.0723055	GBM	0.550478	0.000176338	LGG	0.562757	5.67253e-11	0.0883035	0.000354437	0	0	0	0
centr_pathway_BECN1.xlsx	1.14803e-35	LGG	0.848876	2.76771e-05	LGG	0.633449	0.0256859	GBM	0.531181	4.69904e-35	4.93969e-05	0.0374011	0	1	0	0
centr_pathway_BET1.xlsx	8.1898e-47	GBM	0.935521	1.25335e-11	GBM	0.725986	0.0846457	GBM	0.568178	6.32656e-46	4.85305e-11	0.107983	1	0	0	0
centr_pathway_BET1L.xlsx	1.25129e-44	GBM	0.89376	4.45046e-06	GBM	0.665547	0.125371	GBM	0.552857	8.46661e-44	9.48701e-06	0.155772	1	0	0	0
centr_pathway_BEX1.xlsx	0.777291	GBM	0.509973	0.213769	LGG	0.53352	0.0458216	LGG	0.531335	0.785599	0.244242	0.063741	0	0	0	0
centr_pathway_BGN.xlsx	1.58007e-36	GBM	0.832317	2.01672e-13	GBM	0.743893	1.14494e-21	GBM	0.721595	6.69111e-36	1.04864e-12	1.45462e-20	1	1	1	1
centr_pathway_BHLHE40.xlsx	0.449102	GBM	0.524525	3.58684e-05	GBM	0.622579	2.33195e-13	GBM	0.66673	0.465879	6.31984e-05	1.11721e-12	1	0	0	0
centr_pathway_BHLHE41.xlsx	3.54401e-18	LGG	0.728436	0.848812	GBM	0.50589	0.185179	LGG	0.540002	7.34973e-18	0.86567	0.222652	0	0	0	0
centr_pathway_BHMT.xlsx	0.650681	LGG	0.501719	9.12129e-05	GBM	0.640169	5.25572e-08	GBM	0.62084	0.665742	0.000153972	1.47879e-07	0	0	0	0
centr_pathway_BHMT2.xlsx	2.11313e-05	LGG	0.644676	0.861519	GBM	0.551229	0.242456	GBM	0.512035	2.68683e-05	0.876588	0.28566	0	0	0	0
centr_pathway_BID.xlsx	2.49517e-23	GBM	0.782202	2.35314e-09	GBM	0.694047	1.58732e-12	GBM	0.670592	6.08121e-23	7.06798e-09	7.0637e-12	1	1	0	0
centr_pathway_BIK.xlsx	8.43564e-13	LGG	0.712216	0.00846636	LGG	0.589217	0.965518	GBM	0.5018	1.45261e-12	0.0116473	0.973495	0	0	0	0
centr_pathway_BIN1.xlsx	1.24978e-05	LGG	0.592202	0.00664447	LGG	0.577121	0.0662615	LGG	0.550863	1.60053e-05	0.00924589	0.0858092	1	0	0	0
centr_pathway_BIN2.xlsx	6.89321e-20	LGG	0.720658	4.68231e-05	LGG	0.625306	0.000479966	LGG	0.601276	1.51226e-19	8.13641e-05	0.000912499	1	1	0	0
centr_pathway_BIRC2.xlsx	6.28778e-46	GBM	0.848688	2.25567e-14	GBM	0.745	1.12889e-29	GBM	0.761339	4.63212e-45	1.38381e-13	3.70246e-28	1	1	1	1
centr_pathway_BIRC3.xlsx	1.09208e-32	GBM	0.807441	2.32391e-17	GBM	0.774528	2.20743e-21	GBM	0.729392	3.81385e-32	2.46142e-16	2.69858e-20	1	1	1	1
centr_pathway_BIRC5.xlsx	1.30848e-57	GBM	0.875558	8.02013e-14	GBM	0.744367	3.53698e-19	GBM	0.716999	2.40156e-56	4.417e-13	3.42429e-18	1	1	1	1
centr_pathway_BIRC7.xlsx	1.68312e-45	GBM	0.874078	1.00413e-15	GBM	0.753735	9.62405e-14	GBM	0.677292	1.20893e-44	8.04947e-15	4.82499e-13	1	1	0	0
centr_pathway_BIRC8.xlsx	7.81384e-60	GBM	0.903583	4.79298e-18	GBM	0.777374	1.13366e-18	GBM	0.706809	1.89511e-58	5.85417e-17	1.04846e-17	1	1	1	1
centr_pathway_BLK.xlsx	0.0441651	GBM	0.555196	0.0907039	GBM	0.550755	1.73285e-07	GBM	0.623587	0.0487101	0.109515	4.65743e-07	1	0	0	0
centr_pathway_BLM.xlsx	2.25773e-66	GBM	0.923905	1.73037e-17	GBM	0.782354	8.89606e-11	GBM	0.749209	9.47486e-65	1.87545e-16	3.3066e-10	1	1	1	1
centr_pathway_BLNK.xlsx	1.45758e-18	GBM	0.723418	3.26398e-06	GBM	0.659538	4.05441e-09	GBM	0.640567	3.06448e-18	7.05065e-06	1.27417e-08	1	1	0	0
centr_pathway_BLOC1S1.xlsx	0.00682653	GBM	0.576032	0.469842	GBM	0.527473	0.055366	GBM	0.541208	0.00781999	0.508125	0.0741972	1	0	0	0
centr_pathway_BLVRA.xlsx	5.94879e-17	GBM	0.735812	4.04157e-05	GBM	0.645268	0.000949633	GBM	0.576011	1.18563e-16	7.07916e-05	0.00174482	1	1	0	0
centr_pathway_BLVRB.xlsx	5.94879e-17	GBM	0.735812	4.04157e-05	GBM	0.645268	0.000949633	GBM	0.576011	1.18563e-16	7.07916e-05	0.00174482	1	1	0	0
centr_pathway_BMF.xlsx	5.94087e-07	GBM	0.630626	0.000883668	GBM	0.600838	0.0591916	LGG	0.539168	7.93887e-07	0.00136002	0.0774484	0	0	0	0
centr_pathway_BMI1.xlsx	2.78667e-43	GBM	0.916002	1.272e-14	GBM	0.766938	0.000260573	GBM	0.700073	1.66132e-42	8.22164e-14	0.000511729	1	1	1	1
centr_pathway_BMP1.xlsx	3.55266e-35	GBM	0.829921	4.52566e-08	GBM	0.676457	5.79302e-17	GBM	0.705676	1.41992e-34	1.19285e-07	4.17917e-16	1	1	0	0
centr_pathway_BMP10.xlsx	1.46754e-39	GBM	0.84367	3.33932e-08	GBM	0.67867	7.28681e-19	GBM	0.715784	7.25515e-39	8.93767e-08	6.92852e-18	1	1	0	0
centr_pathway_BMP15.xlsx	3.12232e-34	GBM	0.821128	7.72559e-08	GBM	0.672939	9.59938e-18	GBM	0.709674	1.1912e-33	2.00156e-07	7.8622e-17	1	1	0	0
centr_pathway_BMP2.xlsx	2.13213e-32	GBM	0.814667	2.84788e-06	GBM	0.647522	7.27295e-15	GBM	0.690972	7.35658e-32	6.17691e-06	4.21706e-14	1	1	0	0
centr_pathway_BMP3.xlsx	7.28385e-34	GBM	0.81897	7.88528e-08	GBM	0.673136	9.98969e-18	GBM	0.709629	2.65935e-33	2.04151e-07	8.12822e-17	1	1	0	0
centr_pathway_BMP4.xlsx	3.43819e-28	GBM	0.793969	0.000119227	GBM	0.618745	5.02205e-11	GBM	0.660584	9.83281e-28	0.00019862	1.91936e-10	1	1	0	0
centr_pathway_BMP5.xlsx	6.76851e-40	GBM	0.846631	3.18299e-08	GBM	0.678947	4.90039e-19	GBM	0.716482	3.42089e-39	8.54691e-08	4.69541e-18	1	1	0	0
centr_pathway_BMP6.xlsx	7.79806e-34	GBM	0.819785	1.08426e-07	GBM	0.670725	6.35738e-17	GBM	0.704108	2.84292e-33	2.77627e-07	4.56419e-16	1	1	0	0
centr_pathway_BMP7.xlsx	5.71079e-24	GBM	0.764263	0.000927374	GBM	0.602419	1.17496e-09	GBM	0.653685	1.42818e-23	0.00142552	3.90517e-09	1	1	0	0
centr_pathway_BMP8A.xlsx	1.11836e-07	GBM	0.642205	0.0115455	GBM	0.576646	5.1421e-07	GBM	0.629987	1.52531e-07	0.0156876	1.31647e-06	1	1	0	0
centr_pathway_BMP8B.xlsx	2.56907e-30	GBM	0.801985	7.13625e-06	GBM	0.642383	1.11799e-13	GBM	0.6841	7.95975e-30	1.47438e-05	5.54524e-13	1	1	0	0
centr_pathway_BMPR1A.xlsx	8.41057e-34	GBM	0.842905	0.00105344	GBM	0.596964	1.68926e-10	GBM	0.652878	3.06473e-33	0.00160934	6.09032e-10	1	1	0	0
centr_pathway_BMPR1B.xlsx	1.38429e-29	GBM	0.819133	0.00202409	GBM	0.588505	2.6729e-09	GBM	0.642525	4.16289e-29	0.00298621	8.56641e-09	1	1	0	0
centr_pathway_BMPR2.xlsx	2.17155e-34	GBM	0.846643	0.000347733	GBM	0.608111	4.81136e-11	GBM	0.658091	8.34008e-34	0.000555269	1.84262e-10	1	1	0	0
centr_pathway_BMX.xlsx	0.372947	LGG	0.518892	0.978837	LGG	0.514981	0.263251	GBM	0.510666	0.390402	0.980813	0.307436	0	0	0	0
centr_pathway_BNIP1.xlsx	1.33294e-62	GBM	0.964637	2.57154e-14	GBM	0.749466	0.00164569	GBM	0.591341	3.9083e-61	1.55206e-13	0.00292624	1	1	0	0
centr_pathway_BNIP2.xlsx	0.00495293	LGG	0.580561	0.0313216	LGG	0.558977	0.00489094	LGG	0.558732	0.00572022	0.0400173	0.00808102	1	1	0	0
centr_pathway_BNIP3.xlsx	5.4397e-14	LGG	0.725162	0.0073151	LGG	0.606886	0.856473	LGG	0.502289	9.7375e-14	0.010145	0.879631	1	0	0	0
centr_pathway_BOC.xlsx	0.00071264	LGG	0.626524	0.083133	GBM	0.527512	0.502234	LGG	0.526857	0.000853522	0.100832	0.549065	0	0	0	0
centr_pathway_BORA.xlsx	0.000262033	GBM	0.616815	3.21641e-07	GBM	0.664796	4.56595e-08	GBM	0.641437	0.000319052	7.78336e-07	1.30044e-07	1	1	0	0
centr_pathway_BPGM.xlsx	2.97752e-52	GBM	0.935659	3.31133e-06	GBM	0.644438	0.0134213	GBM	0.558668	3.24702e-51	7.14465e-06	0.020791	1	1	0	0
centr_pathway_BPNT1.xlsx	0.000214967	GBM	0.603781	0.471064	LGG	0.509368	0.692738	GBM	0.507946	0.000262686	0.509077	0.728462	0	0	0	0
centr_pathway_BPNT2.xlsx	2.1372e-28	GBM	0.789503	0.000200883	GBM	0.633014	7.17539e-21	GBM	0.714687	6.18315e-28	0.00032716	8.28229e-20	1	1	0	0
centr_pathway_BRAF.xlsx	7.95642e-20	GBM	0.712028	0.000289748	GBM	0.597755	0.00353141	GBM	0.569538	1.73988e-19	0.000465875	0.00596852	1	1	0	0
centr_pathway_BRAP.xlsx	4.22495e-34	GBM	0.822382	0.000508544	GBM	0.618112	0.0461244	GBM	0.543664	1.55317e-33	0.000800372	0.0641382	1	0	0	0
centr_pathway_BRCA1.xlsx	6.15218e-32	GBM	0.802323	2.75257e-11	GBM	0.717725	3.03627e-08	GBM	0.657248	2.07293e-31	1.02427e-10	8.76505e-08	1	1	0	0
centr_pathway_BRCA2.xlsx	4.89796e-64	GBM	0.913531	3.46707e-20	GBM	0.799391	7.88639e-12	GBM	0.742201	1.63269e-62	6.38728e-19	3.31344e-11	1	1	1	1
centr_pathway_BRD8.xlsx	3.57384e-43	GBM	0.925674	5.90383e-05	GBM	0.638311	0.00914879	GBM	0.612327	2.11878e-42	0.000101501	0.014489	1	1	0	0
centr_pathway_BRF1.xlsx	1.58016e-10	LGG	0.678659	0.142367	GBM	0.539292	0.000121843	LGG	0.560581	2.51895e-10	0.167097	0.000248255	0	0	0	0
centr_pathway_BRF2.xlsx	0.00142174	LGG	0.605487	0.0012261	GBM	0.598308	0.00419182	LGG	0.549657	0.00168125	0.00185108	0.00698637	0	1	0	0
centr_pathway_BRIP1.xlsx	1.12016e-36	GBM	0.818744	4.10859e-10	GBM	0.707605	8.68171e-08	GBM	0.627911	4.76515e-36	1.32703e-09	2.3939e-07	1	1	0	0
centr_pathway_BRK1.xlsx	0.00750178	GBM	0.577074	0.169446	GBM	0.557001	0.749686	LGG	0.506214	0.00856986	0.196434	0.780945	0	0	0	0
centr_pathway_BRPF1.xlsx	3.39465e-15	GBM	0.769808	0.000424959	GBM	0.617084	0.000591761	GBM	0.644519	6.2783e-15	0.000673674	0.00111282	1	1	0	0
centr_pathway_BRPF3.xlsx	2.56931e-10	GBM	0.706847	0.00250305	LGG	0.60819	0.0408989	GBM	0.538561	4.06109e-10	0.00365805	0.0573972	0	0	0	0
centr_pathway_BRS3.xlsx	6.73992e-08	GBM	0.641364	0.55783	GBM	0.529607	0.983179	LGG	0.519432	9.27718e-08	0.593711	0.988592	0	0	0	0
centr_pathway_BRSK1.xlsx	1.96149e-42	GBM	0.876198	3.79644e-15	GBM	0.761127	7.39595e-11	GBM	0.643432	1.10789e-41	2.6543e-14	2.76976e-10	1	1	0	0
centr_pathway_BRSK2.xlsx	2.31557e-32	GBM	0.828366	7.95021e-10	GBM	0.70215	0.00246232	GBM	0.573617	7.97111e-32	2.49567e-09	0.00423664	1	1	0	0
centr_pathway_BSG.xlsx	4.76012e-29	GBM	0.812083	3.91143e-06	GBM	0.648866	1.24885e-07	GBM	0.616108	1.40158e-28	8.37633e-06	3.40326e-07	1	1	0	0
centr_pathway_BST1.xlsx	1.04707e-20	GBM	0.735499	5.06964e-08	GBM	0.67531	5.76571e-34	GBM	0.778092	2.34601e-20	1.33152e-07	5.50329e-32	1	1	0	0
centr_pathway_BTC.xlsx	1.76342e-05	GBM	0.617592	0.0495813	GBM	0.56123	5.0173e-06	GBM	0.622136	2.24752e-05	0.0618704	1.16731e-05	1	0	0	0
centr_pathway_BTD.xlsx	0.584419	LGG	0.519193	3.73919e-06	LGG	0.649498	0.023712	LGG	0.552032	0.600083	8.0167e-06	0.0347785	1	0	0	0
centr_pathway_BTG1.xlsx	0.105885	GBM	0.533243	0.338979	GBM	0.536683	0.039221	GBM	0.532024	0.114782	0.374819	0.0553136	1	0	0	0
centr_pathway_BTG2.xlsx	5.20318e-53	GBM	0.914246	1.93818e-09	GBM	0.702546	4.72684e-16	GBM	0.692078	6.11128e-52	5.88087e-09	3.13369e-15	1	1	0	0
centr_pathway_BTK.xlsx	5.33331e-30	GBM	0.801771	3.04584e-05	GBM	0.634517	8.33877e-15	GBM	0.69205	1.62745e-29	5.40499e-05	4.74634e-14	1	1	0	0
centr_pathway_BTLA.xlsx	3.51059e-12	GBM	0.672211	9.57239e-09	GBM	0.693217	3.64316e-12	GBM	0.661001	5.9277e-12	2.68561e-08	1.57511e-11	1	1	0	0
centr_pathway_BTRC.xlsx	8.65395e-36	GBM	0.833396	2.75105e-12	GBM	0.728358	0.00705435	GBM	0.590896	3.55779e-35	1.17254e-11	0.0113335	1	1	0	0
centr_pathway_BUB1.xlsx	3.1029e-55	GBM	0.870014	2.69311e-13	GBM	0.739821	1.71565e-19	GBM	0.720172	4.57172e-54	1.37631e-12	1.74495e-18	1	1	1	1
centr_pathway_BUB1B.xlsx	5.01767e-66	GBM	0.900848	4.36258e-16	GBM	0.765278	2.0586e-16	GBM	0.697952	2.01516e-64	3.69974e-15	1.42042e-15	1	1	0	0
centr_pathway_BUB3.xlsx	3.25179e-75	GBM	0.919125	3.89796e-19	GBM	0.788086	2.78169e-15	GBM	0.691488	3.91788e-73	5.92331e-18	1.68645e-14	1	1	0	0
centr_pathway_C1GALT1.xlsx	0.000477357	LGG	0.582806	0.0282495	LGG	0.567436	0.00287177	LGG	0.561823	0.000575138	0.0365565	0.0049105	1	1	0	0
centr_pathway_C1GALT1C1.xlsx	0.00215243	LGG	0.572457	0.0429517	LGG	0.560163	0.00551383	LGG	0.557345	0.00252372	0.0540142	0.00901811	1	0	0	0
centr_pathway_C1QA.xlsx	2.5918e-31	GBM	0.800793	1.56149e-12	GBM	0.730532	8.61559e-14	GBM	0.678552	8.41039e-31	6.9622e-12	4.34868e-13	1	1	0	0
centr_pathway_C1QB.xlsx	2.5918e-31	GBM	0.800793	1.56149e-12	GBM	0.730532	8.61559e-14	GBM	0.678552	8.41039e-31	6.9622e-12	4.34868e-13	1	1	0	0
centr_pathway_C1QBP.xlsx	5.14055e-14	GBM	0.696949	0.00254599	GBM	0.600917	0.242181	LGG	0.52489	9.23519e-14	0.00371715	0.285381	0	0	0	0
centr_pathway_C1QC.xlsx	2.5918e-31	GBM	0.800793	1.56149e-12	GBM	0.730532	8.61559e-14	GBM	0.678552	8.41039e-31	6.9622e-12	4.34868e-13	1	1	0	0
centr_pathway_C1R.xlsx	1.71233e-35	GBM	0.810013	2.72059e-12	GBM	0.718673	8.50406e-16	GBM	0.682731	6.9291e-35	1.16209e-11	5.51009e-15	1	1	0	0
centr_pathway_C1S.xlsx	1.71233e-35	GBM	0.810013	2.72059e-12	GBM	0.718673	8.50406e-16	GBM	0.682731	6.9291e-35	1.16209e-11	5.51009e-15	1	1	0	0
centr_pathway_C2.xlsx	4.48484e-22	GBM	0.758894	6.61635e-10	GBM	0.703771	3.83222e-11	GBM	0.660321	1.0453e-21	2.09373e-09	1.48521e-10	1	1	0	0
centr_pathway_C2CD5.xlsx	1.86638e-43	LGG	0.857494	4.09915e-05	LGG	0.637916	1.65934e-09	LGG	0.647629	1.14465e-42	7.17833e-05	5.44699e-09	1	1	0	0
centr_pathway_C3.xlsx	1.04422e-20	GBM	0.741532	1.96373e-05	GBM	0.647205	0.00184606	GBM	0.5669	2.34033e-20	3.5733e-05	0.00326304	1	1	0	0
centr_pathway_C3AR1.xlsx	1.53101e-14	GBM	0.690489	0.0105328	GBM	0.58135	0.347025	GBM	0.546203	2.78196e-14	0.0143665	0.393662	1	0	0	0
centr_pathway_C4A.xlsx	4.35601e-30	LGG	0.772743	1.06147e-09	LGG	0.701123	3.71058e-11	LGG	0.652316	1.33304e-29	3.28909e-09	1.44107e-10	1	1	0	0
centr_pathway_C4B.xlsx	1.60326e-23	GBM	0.766622	2.04386e-10	GBM	0.708949	3.77502e-12	GBM	0.668099	3.93183e-23	6.85522e-10	1.6289e-11	1	1	0	0
centr_pathway_C4BPA.xlsx	2.54685e-20	GBM	0.767826	5.23812e-11	GBM	0.710807	2.06616e-21	GBM	0.718613	5.64204e-20	1.87695e-10	2.54678e-20	1	1	1	1
centr_pathway_C4BPB.xlsx	6.12851e-24	GBM	0.801796	5.11961e-15	GBM	0.748597	5.52732e-28	GBM	0.754259	1.5311e-23	3.50696e-14	1.46968e-26	1	1	1	1
centr_pathway_C5.xlsx	1.36871e-22	GBM	0.75276	5.45658e-07	GBM	0.664519	0.00321934	GBM	0.577987	3.25303e-22	1.26651e-06	0.00547089	1	1	0	0
centr_pathway_C5AR1.xlsx	2.47889e-16	GBM	0.713922	0.0259402	GBM	0.569413	0.436369	GBM	0.554897	4.74682e-16	0.0339576	0.483376	1	0	0	0
centr_pathway_C6.xlsx	2.8626e-13	GBM	0.693073	1.74037e-07	GBM	0.676654	2.51923e-05	GBM	0.602727	4.97988e-13	4.3297e-07	5.4729e-05	1	1	0	0
centr_pathway_C7.xlsx	2.8626e-13	GBM	0.693073	1.74037e-07	GBM	0.676654	2.51923e-05	GBM	0.602727	4.97988e-13	4.3297e-07	5.4729e-05	1	1	0	0
centr_pathway_C8A.xlsx	0.340272	LGG	0.54161	0.295192	LGG	0.544589	0.315716	LGG	0.532351	0.357199	0.329882	0.363448	1	0	0	0
centr_pathway_C8B.xlsx	0.340272	LGG	0.54161	0.295192	LGG	0.544589	0.315716	LGG	0.532351	0.357199	0.329882	0.363448	1	0	0	0
centr_pathway_C8G.xlsx	0.340272	LGG	0.54161	0.295192	LGG	0.544589	0.315716	LGG	0.532351	0.357199	0.329882	0.363448	1	0	0	0
centr_pathway_C9.xlsx	0.340272	LGG	0.54161	0.295192	LGG	0.544589	0.315716	LGG	0.532351	0.357199	0.329882	0.363448	1	0	0	0
centr_pathway_CA1.xlsx	3.7969e-07	GBM	0.65187	0.216058	LGG	0.51174	0.00204085	GBM	0.595765	5.10215e-07	0.24663	0.00359624	0	0	0	0
centr_pathway_CAB39.xlsx	4.70232e-25	LGG	0.755118	1.90006e-15	LGG	0.77184	1.40182e-21	LGG	0.733254	1.21335e-24	1.44957e-14	1.76293e-20	1	1	1	1
centr_pathway_CAB39L.xlsx	1.06183e-16	LGG	0.725513	4.52227e-19	LGG	0.779824	5.6839e-24	LGG	0.735058	2.09727e-16	6.8026e-18	9.15945e-23	1	1	1	1
centr_pathway_CABIN1.xlsx	0.0254596	LGG	0.552486	1.18541e-10	LGG	0.711084	2.01965e-06	LGG	0.622372	0.0284153	4.08448e-10	4.84418e-06	1	1	0	0
centr_pathway_CABLES1.xlsx	0.0507184	GBM	0.54861	0.767474	LGG	0.502648	0.00157829	GBM	0.561769	0.0557648	0.792485	0.00280773	0	0	0	0
centr_pathway_CACNA1A.xlsx	1.24795e-20	LGG	0.732275	0.00547495	LGG	0.582734	0.320968	LGG	0.545731	2.78524e-20	0.00769759	0.365942	1	0	0	0
centr_pathway_CACNA1B.xlsx	1.38164e-18	LGG	0.717535	3.53478e-08	LGG	0.673769	7.33464e-05	LGG	0.601258	2.90727e-18	9.43029e-08	0.000152788	1	1	0	0
centr_pathway_CACNA1C.xlsx	8.47113e-41	LGG	0.83652	2.13774e-12	LGG	0.735196	7.68301e-07	LGG	0.631429	4.45943e-40	9.28681e-12	1.93701e-06	1	1	0	0
centr_pathway_CACNA1D.xlsx	4.03039e-38	LGG	0.821717	1.12975e-11	LGG	0.719306	8.62829e-06	LGG	0.620414	1.83579e-37	4.40412e-11	1.96649e-05	1	1	0	0
centr_pathway_CACNA1E.xlsx	1.14954e-16	LGG	0.706797	2.39675e-11	LGG	0.71978	6.66465e-08	LGG	0.646169	2.26571e-16	8.98148e-11	1.85281e-07	1	1	0	0
centr_pathway_CACNA1F.xlsx	1.23537e-10	LGG	0.667206	0.000105267	LGG	0.617163	0.983963	LGG	0.523512	1.97691e-10	0.000176218	0.989145	1	0	0	0
centr_pathway_CACNA1G.xlsx	1.89145e-43	LGG	0.853643	2.56679e-15	LGG	0.775911	1.99957e-15	LGG	0.722058	1.15718e-42	1.89606e-14	1.2344e-14	1	1	1	1
centr_pathway_CACNA1H.xlsx	1.89145e-43	LGG	0.853643	2.56679e-15	LGG	0.775911	1.99957e-15	LGG	0.722058	1.15718e-42	1.89606e-14	1.2344e-14	1	1	1	1
centr_pathway_CACNA1I.xlsx	2.09724e-40	LGG	0.838878	2.27727e-14	LGG	0.76512	7.09443e-13	LGG	0.704162	1.08643e-39	1.39446e-13	3.27859e-12	1	1	1	1
centr_pathway_CACNA1S.xlsx	2.01868e-36	LGG	0.815156	2.09464e-09	LGG	0.689422	0.00352075	LGG	0.591495	8.49074e-36	6.3247e-09	0.0059532	1	1	0	0
centr_pathway_CACNA2D1.xlsx	2.73022e-11	LGG	0.659052	6.61498e-09	LGG	0.687327	0.0240659	LGG	0.556084	4.48335e-11	1.88645e-08	0.0352559	1	1	0	0
centr_pathway_CACNA2D2.xlsx	1.37252e-35	LGG	0.8135	4.07648e-12	LGG	0.725354	1.23012e-08	LGG	0.650249	5.60873e-35	1.69857e-11	3.69284e-08	1	1	0	0
centr_pathway_CACNA2D3.xlsx	1.76524e-11	LGG	0.660319	1.27735e-08	LGG	0.680963	0.0176794	LGG	0.559702	2.91798e-11	3.54629e-08	0.0267418	1	1	0	0
centr_pathway_CACNA2D4.xlsx	5.89585e-05	LGG	0.593996	9.93665e-07	LGG	0.651751	0.362915	LGG	0.52411	7.37722e-05	2.25299e-06	0.410312	1	0	0	0
centr_pathway_CACNB1.xlsx	1.42146e-40	LGG	0.833885	1.69024e-13	LGG	0.746146	1.75893e-10	LGG	0.668063	7.43061e-40	8.90065e-13	6.33233e-10	1	1	0	0
centr_pathway_CACNB2.xlsx	2.2944e-29	LGG	0.777886	1.48152e-10	LGG	0.710649	5.98078e-06	LGG	0.617513	6.84746e-29	5.04869e-10	1.38025e-05	1	1	0	0
centr_pathway_CACNB3.xlsx	2.2944e-29	LGG	0.777886	1.48152e-10	LGG	0.710649	5.98078e-06	LGG	0.617513	6.84746e-29	5.04869e-10	1.38025e-05	1	1	0	0
centr_pathway_CACNB4.xlsx	2.2944e-29	LGG	0.777886	1.48152e-10	LGG	0.710649	5.98078e-06	LGG	0.617513	6.84746e-29	5.04869e-10	1.38025e-05	1	1	0	0
centr_pathway_CACNG1.xlsx	1.67513e-09	LGG	0.646646	5.82836e-08	LGG	0.669974	0.0243676	LGG	0.556121	2.45501e-09	1.52447e-07	0.0356768	1	1	0	0
centr_pathway_CACNG2.xlsx	1.06456e-20	LGG	0.728386	5.82884e-08	LGG	0.669341	0.0111956	LGG	0.563944	2.38448e-20	1.52447e-07	0.0174961	1	1	0	0
centr_pathway_CACNG3.xlsx	2.80024e-13	LGG	0.672387	1.66326e-06	LGG	0.641908	0.0483854	LGG	0.547082	4.87595e-13	3.70243e-06	0.0670693	1	0	0	0
centr_pathway_CACNG4.xlsx	2.79621e-13	LGG	0.674055	9.48433e-07	LGG	0.647205	0.0124544	LGG	0.56059	4.87005e-13	2.15437e-06	0.0193778	1	1	0	0
centr_pathway_CACNG5.xlsx	0.000526128	LGG	0.57114	2.43048e-07	LGG	0.658234	0.152416	LGG	0.535505	0.000632777	5.95699e-07	0.186635	1	0	0	0
centr_pathway_CACNG6.xlsx	2.17579e-09	LGG	0.641603	5.14934e-08	LGG	0.670962	0.0406124	LGG	0.551125	3.17506e-09	1.3515e-07	0.0570167	1	0	0	0
centr_pathway_CACNG7.xlsx	2.73444e-10	LGG	0.651187	8.91084e-09	LGG	0.682663	0.0100398	LGG	0.563908	4.13962e-10	2.51136e-08	0.0158027	1	1	0	0
centr_pathway_CACNG8.xlsx	2.68323e-13	LGG	0.669	5.74114e-06	LGG	0.633449	0.0383806	LGG	0.55021	4.67738e-13	1.20486e-05	0.0542826	1	0	0	0
centr_pathway_CAD.xlsx	2.76341e-28	GBM	0.756122	6.84116e-08	GBM	0.674757	2.80883e-18	GBM	0.697372	7.96706e-28	1.78391e-07	2.47476e-17	1	1	0	0
centr_pathway_CADM1.xlsx	2.11758e-24	LGG	0.786204	3.26327e-10	LGG	0.724049	6.16191e-05	LGG	0.587914	5.36033e-24	1.0723e-09	0.000129226	1	1	0	0
centr_pathway_CADM3.xlsx	4.89507e-09	LGG	0.649267	0.00334658	LGG	0.598822	0.0570511	LGG	0.517429	7.0523e-09	0.00484153	0.0747529	1	0	0	0
centr_pathway_CALCA.xlsx	4.81939e-11	GBM	0.674645	0.548104	GBM	0.521622	0.602699	LGG	0.509433	7.82117e-11	0.584278	0.642831	0	0	0	0
centr_pathway_CALCB.xlsx	2.16512e-10	GBM	0.667444	0.379152	GBM	0.528382	0.64435	LGG	0.510901	3.42802e-10	0.415599	0.683166	0	0	0	0
centr_pathway_CALCR.xlsx	7.71132e-10	GBM	0.664559	0.537078	GBM	0.522255	0.617529	LGG	0.510203	1.14452e-09	0.574416	0.656318	0	0	0	0
centr_pathway_CALCRL.xlsx	0.000440302	GBM	0.590898	0.08535	LGG	0.556447	0.0304399	LGG	0.544725	0.000531522	0.103386	0.0439366	0	0	0	0
centr_pathway_CALD1.xlsx	2.93149e-47	GBM	0.863829	1.56765e-18	GBM	0.7886	3.75362e-20	GBM	0.715567	2.33457e-46	2.10699e-17	4.04424e-19	1	1	1	1
centr_pathway_CALM1.xlsx	4.60735e-39	LGG	0.832781	7.28243e-10	LGG	0.696774	4.29695e-07	LGG	0.615627	2.19776e-38	2.29475e-09	1.10887e-06	1	1	0	0
centr_pathway_CALM2.xlsx	1.40682e-36	LGG	0.821378	4.46869e-10	LGG	0.701953	2.24137e-07	LGG	0.619834	5.97098e-36	1.43794e-09	5.9469e-07	1	1	0	0
centr_pathway_CALM3.xlsx	5.59216e-39	LGG	0.821968	2.83005e-08	LGG	0.678631	2.69648e-07	LGG	0.649859	2.6506e-38	7.63221e-08	7.09877e-07	1	1	0	0
centr_pathway_CALML3.xlsx	1.57958e-35	LGG	0.815382	1.47596e-09	LGG	0.692545	1.8798e-05	LGG	0.601431	6.43024e-35	4.5301e-09	4.14302e-05	1	1	0	0
centr_pathway_CALML5.xlsx	6.43564e-35	LGG	0.816724	1.47596e-09	LGG	0.692545	1.8798e-05	LGG	0.601431	2.53556e-34	4.5301e-09	4.14302e-05	1	1	0	0
centr_pathway_CALML6.xlsx	8.02239e-29	LGG	0.781901	2.5902e-09	LGG	0.689896	0.00036138	LGG	0.583934	2.34457e-28	7.73631e-09	0.000698462	1	1	0	0
centr_pathway_CALR.xlsx	1.19906e-30	GBM	0.80566	1.36072e-16	GBM	0.758242	1.95761e-15	GBM	0.677282	3.77137e-30	1.25214e-15	1.21151e-14	1	1	0	0
centr_pathway_CALY.xlsx	1.67223e-18	LGG	0.717184	8.37329e-12	LGG	0.726935	1.43749e-09	LGG	0.655149	3.5069e-18	3.33409e-11	4.74385e-09	1	1	0	0
centr_pathway_CAMK1.xlsx	1.58657e-05	GBM	0.621494	0.0512022	LGG	0.566092	0.00166711	LGG	0.55719	2.02454e-05	0.0637636	0.00296292	0	0	0	0
centr_pathway_CAMK1D.xlsx	1.0002e-10	LGG	0.615987	0.00932972	LGG	0.553759	0.018985	LGG	0.557616	1.60781e-10	0.0127841	0.0286351	1	1	0	0
centr_pathway_CAMK1G.xlsx	2.18178e-05	LGG	0.604258	4.15241e-10	LGG	0.701044	2.88537e-11	LGG	0.657302	2.77317e-05	1.33964e-09	1.13599e-10	1	1	0	0
centr_pathway_CAMK2A.xlsx	1.94394e-49	LGG	0.870766	2.80205e-18	LGG	0.792395	8.42629e-18	LGG	0.729392	1.77088e-48	3.60346e-17	6.96268e-17	1	1	1	1
centr_pathway_CAMK2B.xlsx	1.89437e-55	LGG	0.885293	3.01853e-21	LGG	0.816507	8.90202e-19	LGG	0.733526	2.84156e-54	7.11265e-20	8.34704e-18	1	1	1	1
centr_pathway_CAMK2D.xlsx	1.78789e-49	LGG	0.870766	1.52638e-18	LGG	0.794371	7.5877e-18	LGG	0.728712	1.6347e-48	2.05523e-17	6.2837e-17	1	1	1	1
centr_pathway_CAMK2G.xlsx	2.87386e-51	LGG	0.881015	6.6047e-19	LGG	0.795122	2.91894e-19	LGG	0.734641	2.94079e-50	9.54924e-18	2.86695e-18	1	1	1	1
centr_pathway_CAMK2N2.xlsx	1.93796e-30	LGG	0.807178	2.9208e-20	LGG	0.782038	2.79026e-14	LGG	0.672097	6.03692e-30	5.51988e-19	1.50206e-13	1	1	0	0
centr_pathway_CAMK4.xlsx	4.60342e-37	LGG	0.807053	6.86217e-09	LGG	0.676219	7.54015e-11	LGG	0.664591	1.99928e-36	1.95096e-08	2.82234e-10	1	1	0	0
centr_pathway_CAMKK1.xlsx	2.31698e-23	LGG	0.716155	2.06747e-11	LGG	0.720571	8.89493e-10	LGG	0.675651	5.65615e-23	7.81839e-11	2.9723e-09	1	1	0	0
centr_pathway_CAMKK2.xlsx	5.96301e-17	LGG	0.671082	1.00158e-08	LGG	0.684323	4.81176e-07	LGG	0.639996	1.18815e-16	2.80577e-08	1.237e-06	1	1	0	0
centr_pathway_CAMSAP3.xlsx	6.93829e-33	LGG	0.84919	1.75323e-06	LGG	0.666061	9.31858e-21	LGG	0.717099	2.43672e-32	3.88643e-06	1.0657e-19	1	1	0	0
centr_pathway_CANT1.xlsx	1.38341e-06	GBM	0.630124	0.000323706	GBM	0.626057	0.234235	GBM	0.534263	1.82774e-06	0.000518905	0.276718	1	0	0	0
centr_pathway_CANX.xlsx	2.71711e-48	GBM	0.830523	4.32228e-15	GBM	0.744802	4.81814e-18	GBM	0.694081	2.2831e-47	2.99106e-14	4.11838e-17	1	1	0	0
centr_pathway_CAP1.xlsx	0.462793	LGG	0.500339	0.05094	GBM	0.571508	0.00301393	GBM	0.565848	0.479482	0.0634598	0.00514178	0	0	0	0
centr_pathway_CAP2.xlsx	0.660665	GBM	0.513197	0.00680026	GBM	0.591588	0.00132771	GBM	0.569692	0.675495	0.00945737	0.00238994	1	0	0	0
centr_pathway_CAPN1.xlsx	1.51756e-36	LGG	0.833584	9.36977e-07	LGG	0.6527	2.75694e-10	LGG	0.654863	6.43734e-36	2.129e-06	9.67725e-10	1	1	0	0
centr_pathway_CAPN10.xlsx	7.42383e-43	LGG	0.847898	1.3754e-14	LGG	0.742312	4.72436e-19	LGG	0.717117	4.32574e-42	8.85156e-14	4.55017e-18	1	1	1	1
centr_pathway_CAPN11.xlsx	3.51855e-42	LGG	0.84372	9.63594e-15	LGG	0.744446	1.30456e-19	LGG	0.722348	1.96146e-41	6.357e-14	1.35083e-18	1	1	1	1
centr_pathway_CAPN2.xlsx	2.16884e-40	LGG	0.842052	1.68731e-12	LGG	0.720966	4.97852e-17	LGG	0.7035	1.12275e-39	7.45179e-12	3.61964e-16	1	1	1	1
centr_pathway_CAPN3.xlsx	6.28087e-43	LGG	0.851096	4.46367e-16	LGG	0.760455	5.36039e-20	LGG	0.729228	3.67409e-42	3.77687e-15	5.69302e-19	1	1	1	1
centr_pathway_CAPN5.xlsx	1.86923e-40	LGG	0.839242	1.53848e-13	LGG	0.732904	1.46854e-17	LGG	0.7068	9.7101e-40	8.13605e-13	1.13416e-16	1	1	1	1
centr_pathway_CAPN6.xlsx	3.11574e-37	LGG	0.822282	1.96963e-14	LGG	0.741323	1.62567e-19	LGG	0.722157	1.36188e-36	1.22317e-13	1.66023e-18	1	1	1	1
centr_pathway_CAPN7.xlsx	2.93863e-43	LGG	0.848951	4.48101e-15	LGG	0.747253	9.33089e-20	LGG	0.722601	1.74913e-42	3.08941e-14	9.77053e-19	1	1	1	1
centr_pathway_CAPN9.xlsx	8.56534e-45	LGG	0.855888	3.93442e-15	LGG	0.748439	7.63845e-20	LGG	0.723898	5.89163e-44	2.73602e-14	8.03224e-19	1	1	1	1
centr_pathway_CAPNS1.xlsx	7.93467e-38	LGG	0.82819	1.56527e-11	LGG	0.711914	2.80381e-16	LGG	0.699312	3.55348e-37	6.00155e-11	1.90982e-15	1	1	0	0
centr_pathway_CARD10.xlsx	2.31249e-48	LGG	0.87734	3.43811e-15	LGG	0.76176	2.69546e-12	LGG	0.683021	1.95632e-47	2.41739e-14	1.17837e-11	1	1	0	0
centr_pathway_CARD11.xlsx	0.0574286	GBM	0.547117	0.287478	GBM	0.528065	0.0037118	GBM	0.559865	0.0629481	0.32184	0.00624506	1	0	0	0
centr_pathway_CARD16.xlsx	3.2326e-62	GBM	0.905013	8.1214e-24	GBM	0.81204	1.0992e-16	GBM	0.701179	9.14678e-61	5.03933e-22	7.76431e-16	1	1	1	1
centr_pathway_CARD6.xlsx	2.24545e-06	GBM	0.616601	0.135994	GBM	0.555024	0.000640108	GBM	0.572348	2.94427e-06	0.159996	0.0011992	1	0	0	0
centr_pathway_CARD8.xlsx	4.65922e-18	GBM	0.702795	1.39261e-09	GBM	0.702111	1.32885e-14	GBM	0.673348	9.60385e-18	4.28486e-09	7.43858e-14	1	1	0	0
centr_pathway_CARD9.xlsx	4.38998e-22	LGG	0.751179	2.82777e-08	LGG	0.668432	1.46559e-08	LGG	0.640712	1.02383e-21	7.62883e-08	4.3593e-08	1	1	0	0
centr_pathway_CARM1.xlsx	1.16594e-27	LGG	0.825368	1.58259e-08	LGG	0.680212	0.205824	LGG	0.561007	3.28787e-27	4.35637e-08	0.24557	1	0	0	0
centr_pathway_CARNMT1.xlsx	1.05422e-10	LGG	0.68581	#NUM!	GBM	0.5	#NUM!	GBM	0.5	1.69137e-10	#NUM!	#NUM!	0	0	0	0
centr_pathway_CARNS1.xlsx	0.00326602	LGG	0.585943	1.97528e-07	LGG	0.670211	0.0306777	LGG	0.558577	0.00380018	4.88797e-07	0.0442497	1	1	0	0
centr_pathway_CARS.xlsx	1.21771e-13	GBM	0.724961	3.06277e-05	GBM	0.685864	6.38951e-07	GBM	0.607795	2.1484e-13	5.43244e-05	1.62521e-06	1	1	0	0
centr_pathway_CARS1.xlsx	6.44363e-24	GBM	0.787019	1.62672e-10	GBM	0.720334	0.0977262	GBM	0.543601	1.60661e-23	5.52329e-10	0.123527	1	0	0	0
centr_pathway_CARS2.xlsx	2.02251e-27	GBM	0.847584	2.72994e-08	GBM	0.721875	0.000943919	GBM	0.570109	5.66273e-27	7.36758e-08	0.00173518	1	1	0	0
centr_pathway_CASC3.xlsx	1.89902e-11	GBM	0.675448	0.335992	GBM	0.514468	0.00367426	LGG	0.557952	3.13219e-11	0.371849	0.00618469	0	0	0	0
centr_pathway_CASK.xlsx	0.000679895	LGG	0.583873	0.628076	GBM	0.518065	0.00330685	GBM	0.560889	0.000815481	0.662979	0.00561321	0	0	0	0
centr_pathway_CASP1.xlsx	1.86535e-27	GBM	0.800994	5.06167e-15	GBM	0.753815	1.92245e-19	GBM	0.717579	5.23251e-27	3.47046e-14	1.9473e-18	1	1	1	1
centr_pathway_CASP10.xlsx	3.88977e-18	GBM	0.745308	2.90741e-11	GBM	0.718199	1.25085e-18	GBM	0.718359	8.05561e-18	1.07883e-10	1.1497e-17	1	1	1	1
centr_pathway_CASP12.xlsx	1.66346e-52	GBM	0.888755	1.33519e-10	GBM	0.716895	9.43268e-15	GBM	0.669613	1.87422e-51	4.57517e-10	5.35261e-14	1	1	0	0
centr_pathway_CASP2.xlsx	7.67534e-58	GBM	0.892217	2.10063e-23	GBM	0.810657	2.55759e-33	GBM	0.776714	1.4552e-56	1.1501e-21	2.16378e-31	1	1	1	1
centr_pathway_CASP3.xlsx	8.03383e-12	GBM	0.683251	3.96297e-10	GBM	0.707052	3.71357e-15	GBM	0.689603	1.34017e-11	1.28185e-09	2.22555e-14	1	1	0	0
centr_pathway_CASP4.xlsx	1.26388e-18	GBM	0.750276	4.8926e-13	GBM	0.736699	5.73334e-18	GBM	0.714361	2.66173e-18	2.43355e-12	4.87269e-17	1	1	1	1
centr_pathway_CASP5.xlsx	8.20746e-07	GBM	0.645567	4.93285e-05	GBM	0.632184	2.20505e-05	GBM	0.611076	1.09189e-06	8.55779e-05	4.82131e-05	1	1	0	0
centr_pathway_CASP6.xlsx	3.79822e-20	GBM	0.722753	2.67345e-14	GBM	0.741205	2.38427e-15	GBM	0.677137	8.3819e-20	1.61056e-13	1.46339e-14	1	1	0	0
centr_pathway_CASP7.xlsx	3.39016e-28	GBM	0.807178	7.40051e-17	GBM	0.766187	2.64903e-21	GBM	0.729854	9.69915e-28	7.15638e-16	3.19126e-20	1	1	1	1
centr_pathway_CASP8.xlsx	3.38563e-41	GBM	0.868997	1.00471e-19	GBM	0.796585	5.63477e-28	GBM	0.769598	1.82078e-40	1.71191e-18	1.49291e-26	1	1	1	1
centr_pathway_CASP9.xlsx	1.35623e-22	GBM	0.773885	1.29767e-12	GBM	0.729821	3.35761e-16	GBM	0.701415	3.22438e-22	5.92534e-12	2.26221e-15	1	1	1	1
centr_pathway_CASR.xlsx	4.53402e-06	GBM	0.608523	0.269787	GBM	0.544984	0.362771	GBM	0.538361	5.88721e-06	0.30344	0.410211	1	0	0	0
centr_pathway_CAST.xlsx	8.81385e-31	GBM	0.829068	1.72252e-07	GBM	0.669341	9.67311e-10	GBM	0.649379	2.78627e-30	4.28958e-07	3.22365e-09	1	1	0	0
centr_pathway_CAT.xlsx	1.64843e-23	GBM	0.770197	1.95262e-08	GBM	0.689541	1.56081e-12	GBM	0.660366	4.04127e-23	5.32961e-08	6.94991e-12	1	1	0	0
centr_pathway_CAV1.xlsx	0.131936	GBM	0.550454	3.70145e-07	GBM	0.673018	9.75893e-10	GBM	0.645879	0.142319	8.9079e-07	3.25079e-09	1	0	0	0
centr_pathway_CAV2.xlsx	2.36867e-25	GBM	0.801596	0.000105137	GBM	0.61657	5.33157e-09	GBM	0.621873	6.19536e-25	0.000176039	1.6484e-08	1	1	0	0
centr_pathway_CAV3.xlsx	5.39907e-05	LGG	0.641339	0.0053735	LGG	0.601984	0.000140015	LGG	0.617051	6.76582e-05	0.00756067	0.00028388	1	1	0	0
centr_pathway_CBFA2T3.xlsx	1.3806e-58	LGG	0.923453	4.93299e-25	LGG	0.826468	2.21373e-22	LGG	0.731721	2.83326e-57	4.6495e-23	3.03522e-21	1	1	1	1
centr_pathway_CBFB.xlsx	6.91945e-05	LGG	0.596881	0.573081	GBM	0.530832	0.375103	GBM	0.518507	8.62909e-05	0.608551	0.422551	0	0	0	0
centr_pathway_CBL.xlsx	0.000358381	GBM	0.592754	0.000946774	GBM	0.614673	1.97869e-09	GBM	0.643567	0.000434348	0.00145474	6.4133e-09	1	1	0	0
centr_pathway_CBLB.xlsx	0.486738	LGG	0.522053	0.814471	GBM	0.509843	0.0554819	LGG	0.532487	0.503801	0.834303	0.0741972	0	0	0	0
centr_pathway_CBLC.xlsx	1.37255e-32	LGG	0.822482	1.57716e-07	LGG	0.670725	1.68316e-16	LGG	0.697689	4.75774e-32	3.93945e-07	1.1646e-15	1	1	0	0
centr_pathway_CBLL1.xlsx	0.875893	GBM	0.509898	0.0265385	LGG	0.566487	0.469695	GBM	0.514419	0.880372	0.0346981	0.516678	0	0	0	0
centr_pathway_CBR1.xlsx	0.000808689	LGG	0.588602	0.105632	LGG	0.562021	0.0203692	LGG	0.542114	0.000965001	0.12631	0.0303237	1	0	0	0
centr_pathway_CBR3.xlsx	0.000388338	LGG	0.592842	0.072854	LGG	0.563167	0.012742	LGG	0.543048	0.000469475	0.0889442	0.019788	1	0	0	0
centr_pathway_CBS.xlsx	0.420542	GBM	0.508029	0.000303761	LGG	0.625227	0.00221138	LGG	0.579945	0.437832	0.000487563	0.00382433	0	0	0	0
centr_pathway_CBX2.xlsx	2.78667e-43	GBM	0.916002	1.272e-14	GBM	0.766938	0.000260573	GBM	0.700073	1.66132e-42	8.22164e-14	0.000511729	1	1	1	1
centr_pathway_CBX4.xlsx	2.78667e-43	GBM	0.916002	1.272e-14	GBM	0.766938	0.000260573	GBM	0.700073	1.66132e-42	8.22164e-14	0.000511729	1	1	1	1
centr_pathway_CBX5.xlsx	1.15675e-32	LGG	0.815094	0.99323	LGG	0.530991	0.98197	LGG	0.509016	4.02277e-32	0.99363	0.987942	1	0	0	0
centr_pathway_CBX6.xlsx	2.78667e-43	GBM	0.916002	1.272e-14	GBM	0.766938	0.000260573	GBM	0.700073	1.66132e-42	8.22164e-14	0.000511729	1	1	1	1
centr_pathway_CBX8.xlsx	2.78667e-43	GBM	0.916002	1.272e-14	GBM	0.766938	0.000260573	GBM	0.700073	1.66132e-42	8.22164e-14	0.000511729	1	1	1	1
centr_pathway_CBY1.xlsx	2.2162e-18	GBM	0.731597	0.97452	LGG	0.525061	0.416309	GBM	0.53265	4.62818e-18	0.976968	0.462255	0	0	0	0
centr_pathway_CCAR1.xlsx	4.52967e-08	GBM	0.650835	1.09961e-12	GBM	0.724919	0.318585	GBM	0.549122	6.28001e-08	5.06038e-12	0.363448	1	0	0	0
centr_pathway_CCAR2.xlsx	1.17619e-11	LGG	0.706057	0.000914722	LGG	0.615464	4.95914e-09	LGG	0.636034	1.95551e-11	0.00140636	1.53517e-08	1	1	0	0
centr_pathway_CCBL1.xlsx	0.602335	GBM	0.525528	4.44597e-14	LGG	0.743458	4.67731e-14	LGG	0.670574	0.617716	2.55044e-13	2.45057e-13	0	0	0	0
centr_pathway_CCDC88C.xlsx	5.81559e-19	LGG	0.749047	0.43803	LGG	0.537592	0.00102137	LGG	0.571287	1.23521e-18	0.476142	0.00186741	1	0	0	0
centr_pathway_CCK.xlsx	0.00659593	GBM	0.57099	0.0437269	LGG	0.560123	0.041847	LGG	0.541353	0.00756744	0.0549242	0.0586063	0	0	0	0
centr_pathway_CCKAR.xlsx	1.59753e-13	GBM	0.683915	0.633274	LGG	0.511305	0.8397	LGG	0.516812	2.8013e-13	0.667803	0.864192	0	0	0	0
centr_pathway_CCKBR.xlsx	0.0123824	GBM	0.574816	0.65105	LGG	0.501067	0.408845	LGG	0.504646	0.0139701	0.684319	0.455054	0	0	0	0
centr_pathway_CCL1.xlsx	7.08018e-31	GBM	0.805798	8.23371e-06	GBM	0.641908	7.7787e-14	GBM	0.685913	2.24963e-30	1.68198e-05	3.97477e-13	1	1	0	0
centr_pathway_CCL11.xlsx	5.73151e-20	GBM	0.735524	0.020325	GBM	0.571508	2.69918e-07	GBM	0.625599	1.25925e-19	0.0268572	7.10335e-07	1	1	0	0
centr_pathway_CCL13.xlsx	3.5622e-31	GBM	0.809097	8.23371e-06	GBM	0.641908	7.7787e-14	GBM	0.685913	1.14945e-30	1.68198e-05	3.97477e-13	1	1	0	0
centr_pathway_CCL14.xlsx	2.40847e-31	GBM	0.808596	7.61517e-06	GBM	0.642462	1.00698e-13	GBM	0.684644	7.8325e-31	1.56464e-05	5.02142e-13	1	1	0	0
centr_pathway_CCL15.xlsx	2.04358e-31	GBM	0.808081	8.23371e-06	GBM	0.641908	7.7787e-14	GBM	0.685913	6.6691e-31	1.68198e-05	3.97477e-13	1	1	0	0
centr_pathway_CCL16.xlsx	1.2284e-32	GBM	0.810628	1.12175e-05	GBM	0.641434	7.35841e-15	GBM	0.691624	4.26202e-32	2.10181e-05	4.25998e-14	1	1	0	0
centr_pathway_CCL17.xlsx	5.35535e-31	GBM	0.805848	9.03495e-06	GBM	0.641316	9.06295e-14	GBM	0.685287	1.71106e-30	1.83809e-05	4.54981e-13	1	1	0	0
centr_pathway_CCL18.xlsx	4.15055e-32	GBM	0.814981	6.05052e-06	GBM	0.644003	3.8888e-14	GBM	0.687853	1.41251e-31	1.26197e-05	2.06065e-13	1	1	0	0
centr_pathway_CCL19.xlsx	7.07615e-31	GBM	0.80211	2.71786e-05	GBM	0.635702	5.47389e-14	GBM	0.685224	2.24931e-30	4.85537e-05	2.84987e-13	1	1	0	0
centr_pathway_CCL2.xlsx	5.94655e-32	GBM	0.81054	3.74516e-06	GBM	0.648431	6.7727e-15	GBM	0.692204	2.00635e-31	8.0272e-06	3.95473e-14	1	1	0	0
centr_pathway_CCL20.xlsx	1.06771e-33	GBM	0.816699	6.64535e-06	GBM	0.64515	2.36353e-15	GBM	0.694607	3.87552e-33	1.37792e-05	1.45185e-14	1	1	0	0
centr_pathway_CCL21.xlsx	6.43873e-32	GBM	0.806538	1.597e-05	GBM	0.639655	1.33336e-14	GBM	0.689467	2.16752e-31	2.94557e-05	7.45818e-14	1	1	0	0
centr_pathway_CCL22.xlsx	4.49386e-31	GBM	0.8063	8.94307e-06	GBM	0.640881	9.69624e-14	GBM	0.685278	1.44197e-30	1.8199e-05	4.85791e-13	1	1	0	0
centr_pathway_CCL23.xlsx	1.00701e-31	GBM	0.81113	8.23371e-06	GBM	0.641908	7.7787e-14	GBM	0.685913	3.35072e-31	1.68198e-05	3.97477e-13	1	1	0	0
centr_pathway_CCL24.xlsx	1.07612e-31	GBM	0.811293	8.23371e-06	GBM	0.641908	7.7787e-14	GBM	0.685913	3.57271e-31	1.68198e-05	3.97477e-13	1	1	0	0
centr_pathway_CCL25.xlsx	2.01379e-45	GBM	0.867793	7.4099e-10	GBM	0.702585	1.01993e-20	GBM	0.720299	1.43814e-44	2.33393e-09	1.15929e-19	1	1	1	1
centr_pathway_CCL26.xlsx	7.08095e-32	GBM	0.810766	6.22892e-06	GBM	0.643806	3.46648e-14	GBM	0.688297	2.37729e-31	1.29545e-05	1.84738e-13	1	1	0	0
centr_pathway_CCL27.xlsx	1.2766e-32	GBM	0.810653	9.38695e-06	GBM	0.642936	2.61456e-15	GBM	0.694761	4.4272e-32	1.90554e-05	1.58901e-14	1	1	0	0
centr_pathway_CCL28.xlsx	2.2046e-32	GBM	0.808922	1.13154e-05	GBM	0.641434	7.11944e-15	GBM	0.691525	7.60313e-32	2.11855e-05	4.1345e-14	1	1	0	0
centr_pathway_CCL3.xlsx	2.62272e-30	GBM	0.802399	1.59517e-05	GBM	0.638588	2.0586e-13	GBM	0.681027	8.1226e-30	2.94293e-05	9.92975e-13	1	1	0	0
centr_pathway_CCL3L1.xlsx	2.16816e-31	GBM	0.808119	2.15392e-05	GBM	0.636177	4.28289e-13	GBM	0.678951	7.06638e-31	3.89841e-05	2.00794e-12	1	1	0	0
centr_pathway_CCL3L3.xlsx	3.59224e-31	GBM	0.81069	0.0547161	GBM	0.560914	4.46432e-05	GBM	0.600134	1.15694e-30	0.067982	9.47189e-05	1	0	0	0
centr_pathway_CCL4.xlsx	5.78423e-18	GBM	0.721988	0.0351052	GBM	0.563839	1.27699e-06	GBM	0.617857	1.18965e-17	0.0446597	3.12428e-06	1	1	0	0
centr_pathway_CCL4L1.xlsx	2.50784e-31	GBM	0.807554	1.84042e-05	GBM	0.6359	1.94813e-13	GBM	0.682332	8.15212e-31	3.36453e-05	9.44261e-13	1	1	0	0
centr_pathway_CCL4L2.xlsx	4.14095e-30	GBM	0.801119	2.61214e-05	GBM	0.634635	2.68157e-13	GBM	0.680601	1.27035e-29	4.67324e-05	1.2773e-12	1	1	0	0
centr_pathway_CCL5.xlsx	1.85068e-34	GBM	0.819283	1.77237e-06	GBM	0.655585	8.58472e-17	GBM	0.704144	7.11874e-34	3.92769e-06	6.08118e-16	1	1	0	0
centr_pathway_CCL7.xlsx	5.42758e-32	GBM	0.813149	8.23371e-06	GBM	0.641908	7.7787e-14	GBM	0.685913	1.83291e-31	1.68198e-05	3.97477e-13	1	1	0	0
centr_pathway_CCL8.xlsx	6.95392e-32	GBM	0.810527	8.53365e-06	GBM	0.642106	5.72236e-14	GBM	0.686384	2.33674e-31	1.74134e-05	2.96265e-13	1	1	0	0
centr_pathway_CCM2.xlsx	2.58054e-14	GBM	0.710271	7.73858e-10	GBM	0.708159	0.0103259	GBM	0.581078	4.66973e-14	2.43129e-09	0.016222	1	1	0	0
centr_pathway_CCNA1.xlsx	2.27077e-75	GBM	0.936826	3.70254e-20	GBM	0.799589	1.83191e-10	GBM	0.658553	2.80019e-73	6.79043e-19	6.55699e-10	1	1	0	0
centr_pathway_CCNA2.xlsx	2.10505e-72	GBM	0.924733	3.38951e-19	GBM	0.789865	5.65713e-12	GBM	0.667419	1.76683e-70	5.21452e-18	2.41499e-11	1	1	0	0
centr_pathway_CCNB1.xlsx	4.87178e-53	GBM	0.908952	1.91209e-12	GBM	0.7416	2.85566e-10	GBM	0.710898	5.75825e-52	8.36512e-12	1.00143e-09	1	1	1	1
centr_pathway_CCNB2.xlsx	9.04497e-07	GBM	0.615585	0.274381	GBM	0.557831	0.312597	GBM	0.53032	1.20117e-06	0.307687	0.360429	1	0	0	0
centr_pathway_CCNB3.xlsx	1.74383e-59	GBM	0.887388	8.03439e-18	GBM	0.761602	5.11463e-06	GBM	0.604214	4.10927e-58	9.31839e-17	1.18847e-05	1	1	0	0
centr_pathway_CCNC.xlsx	2.20824e-51	LGG	0.904586	3.19298e-09	LGG	0.703732	1.98486e-20	LGG	0.725756	2.27211e-50	9.45326e-09	2.19901e-19	1	1	1	1
centr_pathway_CCND1.xlsx	4.36676e-76	GBM	0.946598	3.82024e-16	GBM	0.76674	1.72467e-12	GBM	0.67119	6.39601e-74	3.2472e-15	7.63839e-12	1	1	0	0
centr_pathway_CCND2.xlsx	2.62086e-12	GBM	0.683853	0.00786645	GBM	0.590837	0.335326	GBM	0.525125	4.44446e-12	0.0108671	0.381553	1	0	0	0
centr_pathway_CCND3.xlsx	2.29791e-16	GBM	0.71421	0.00234204	GBM	0.607242	0.317061	GBM	0.530519	4.40477e-16	0.00343555	0.363448	1	0	0	0
centr_pathway_CCNE1.xlsx	9.79075e-41	LGG	0.851247	1.156e-11	LGG	0.716895	0.390321	LGG	0.540827	5.14686e-40	4.49717e-11	0.437774	1	0	0	0
centr_pathway_CCNE2.xlsx	6.5087e-59	GBM	0.955555	1.73919e-21	GBM	0.811092	0.00562196	GBM	0.588811	1.4052e-57	4.33112e-20	0.00917683	1	1	0	0
centr_pathway_CCNF.xlsx	1.41054e-21	LGG	0.727508	1.4544e-08	LGG	0.685825	1.84789e-08	LGG	0.645906	3.23113e-21	4.01984e-08	5.43561e-08	1	1	0	0
centr_pathway_CCNG1.xlsx	3.36429e-19	LGG	0.717585	6.7136e-10	LGG	0.697644	4.87986e-12	LGG	0.671218	7.21541e-19	2.1227e-09	2.09277e-11	1	1	0	0
centr_pathway_CCNH.xlsx	1.16056e-09	GBM	0.677229	1.21389e-07	GBM	0.684323	0.140352	GBM	0.538996	1.71094e-09	3.09541e-07	0.1728	1	0	0	0
centr_pathway_CCNO.xlsx	1.99054e-17	GBM	0.701014	0.000725416	GBM	0.623251	0.106643	GBM	0.548651	4.02199e-17	0.0011232	0.134092	1	0	0	0
centr_pathway_CCNT1.xlsx	0.000143151	LGG	0.621557	0.711812	LGG	0.532611	1.0097e-06	LGG	0.602065	0.00017608	0.740349	2.48998e-06	1	0	0	0
centr_pathway_CCNT2.xlsx	0.000143151	LGG	0.621557	0.711812	LGG	0.532611	1.0097e-06	LGG	0.602065	0.00017608	0.740349	2.48998e-06	1	0	0	0
centr_pathway_CCP110.xlsx	0.74668	GBM	0.530257	9.88092e-06	GBM	0.638667	9.83669e-07	GBM	0.619879	0.755683	1.98686e-05	2.43141e-06	1	0	0	0
centr_pathway_CCR1.xlsx	2.6307e-30	GBM	0.820563	0.000388034	GBM	0.610523	3.24592e-09	GBM	0.641265	8.14395e-30	0.000617109	1.03229e-08	1	1	0	0
centr_pathway_CCR10.xlsx	1.07877e-30	GBM	0.822721	0.000476622	GBM	0.607914	4.88956e-09	GBM	0.639388	3.39587e-30	0.000753168	1.51426e-08	1	1	0	0
centr_pathway_CCR2.xlsx	2.35152e-25	GBM	0.79797	0.0276363	GBM	0.559293	0.000297088	GBM	0.574959	6.15266e-25	0.0360134	0.000580378	1	1	0	0
centr_pathway_CCR3.xlsx	3.24916e-29	GBM	0.813939	0.000621726	GBM	0.604158	2.68901e-08	GBM	0.626778	9.6429e-29	0.000969501	7.81104e-08	1	1	0	0
centr_pathway_CCR4.xlsx	1.36615e-30	GBM	0.822972	0.000508828	GBM	0.606412	4.22952e-09	GBM	0.640422	4.28069e-30	0.000800493	1.32584e-08	1	1	0	0
centr_pathway_CCR5.xlsx	5.49603e-30	GBM	0.819283	0.000486544	GBM	0.606767	2.39655e-08	GBM	0.627014	1.67573e-29	0.000768194	6.97784e-08	1	1	0	0
centr_pathway_CCR6.xlsx	3.18989e-30	GBM	0.820613	0.000541142	GBM	0.605898	4.72881e-09	GBM	0.64015	9.83428e-30	0.000849356	1.47121e-08	1	1	0	0
centr_pathway_CCR7.xlsx	1.68106e-30	GBM	0.822257	0.000503015	GBM	0.60653	3.83343e-09	GBM	0.64092	5.2476e-30	0.000792856	1.20829e-08	1	1	0	0
centr_pathway_CCR8.xlsx	3.28985e-30	GBM	0.820688	0.000505059	GBM	0.607163	4.46435e-09	GBM	0.640023	1.01257e-29	0.000795404	1.39417e-08	1	1	0	0
centr_pathway_CCR9.xlsx	5.87756e-30	GBM	0.818481	0.000631919	GBM	0.604119	4.49179e-09	GBM	0.640095	1.78841e-29	0.000984161	1.40215e-08	1	1	0	0
centr_pathway_CCRL2.xlsx	8.67847e-36	GBM	0.855048	2.12927e-05	GBM	0.631117	8.39389e-12	GBM	0.664237	3.56591e-35	3.85568e-05	3.51476e-11	1	1	0	0
centr_pathway_CCS.xlsx	4.59512e-21	LGG	0.734445	0.0790093	LGG	0.588268	1.64588e-05	LGG	0.585439	1.03954e-20	0.0961123	3.6567e-05	1	0	0	0
centr_pathway_CCT2.xlsx	6.93109e-44	GBM	0.884415	4.15395e-11	GBM	0.709938	6.41854e-08	GBM	0.623451	4.39145e-43	1.50293e-10	1.78639e-07	1	1	0	0
centr_pathway_CCT3.xlsx	6.93109e-44	GBM	0.884415	4.15395e-11	GBM	0.709938	6.41854e-08	GBM	0.623451	4.39145e-43	1.50293e-10	1.78639e-07	1	1	0	0
centr_pathway_CCT4.xlsx	6.93109e-44	GBM	0.884415	4.15395e-11	GBM	0.709938	6.41854e-08	GBM	0.623451	4.39145e-43	1.50293e-10	1.78639e-07	1	1	0	0
centr_pathway_CCT5.xlsx	6.93109e-44	GBM	0.884415	4.15395e-11	GBM	0.709938	6.41854e-08	GBM	0.623451	4.39145e-43	1.50293e-10	1.78639e-07	1	1	0	0
centr_pathway_CCT6A.xlsx	6.93109e-44	GBM	0.884415	4.15395e-11	GBM	0.709938	6.41854e-08	GBM	0.623451	4.39145e-43	1.50293e-10	1.78639e-07	1	1	0	0
centr_pathway_CCT7.xlsx	6.93109e-44	GBM	0.884415	4.15395e-11	GBM	0.709938	6.41854e-08	GBM	0.623451	4.39145e-43	1.50293e-10	1.78639e-07	1	1	0	0
centr_pathway_CCT8.xlsx	6.93109e-44	GBM	0.884415	4.15395e-11	GBM	0.709938	6.41854e-08	GBM	0.623451	4.39145e-43	1.50293e-10	1.78639e-07	1	1	0	0
centr_pathway_CD14.xlsx	9.42935e-28	GBM	0.787069	9.58743e-11	GBM	0.71061	1.32325e-26	GBM	0.752654	2.66606e-27	3.3484e-10	2.88903e-25	1	1	1	1
centr_pathway_CD151.xlsx	0.0295262	LGG	0.561932	0.0177998	GBM	0.592537	1.89089e-05	GBM	0.610986	0.0328055	0.0236801	4.16253e-05	0	1	0	0
centr_pathway_CD180.xlsx	1.71874e-15	GBM	0.706972	4.73111e-08	GBM	0.67278	8.94284e-16	GBM	0.681951	3.20493e-15	1.24612e-07	5.77946e-15	1	1	0	0
centr_pathway_CD19.xlsx	1.42919e-17	GBM	0.711451	2.70791e-06	GBM	0.659341	1.32121e-11	GBM	0.65101	2.90268e-17	5.88532e-06	5.3692e-11	1	1	0	0
centr_pathway_CD2.xlsx	6.77199e-29	GBM	0.794094	9.74318e-05	GBM	0.621077	3.21796e-12	GBM	0.673783	1.98457e-28	0.000163987	1.39451e-11	1	1	0	0
centr_pathway_CD209.xlsx	7.30353e-51	GBM	0.876574	8.43646e-12	GBM	0.724524	8.60562e-23	GBM	0.729936	7.23573e-50	3.35745e-11	1.22036e-21	1	1	1	1
centr_pathway_CD22.xlsx	0.000160559	GBM	0.589054	0.133883	GBM	0.543758	0.000845457	GBM	0.574007	0.000197234	0.157686	0.00156422	1	0	0	0
centr_pathway_CD226.xlsx	1.85336e-26	GBM	0.761278	4.59274e-11	GBM	0.720255	6.04708e-14	GBM	0.669513	5.03805e-26	1.65365e-10	3.1286e-13	1	1	0	0
centr_pathway_CD24.xlsx	1.6897e-15	LGG	0.728436	7.28337e-07	LGG	0.653135	5.44235e-10	LGG	0.64092	3.15236e-15	1.67125e-06	1.86462e-09	1	1	0	0
centr_pathway_CD244.xlsx	1.97092e-30	GBM	0.802662	0.000404365	GBM	0.617835	0.00012182	GBM	0.587859	6.1331e-30	0.000641983	0.000248255	1	1	0	0
centr_pathway_CD247.xlsx	1.52723e-26	GBM	0.777861	4.91171e-05	GBM	0.640446	0.00143367	GBM	0.561968	4.17279e-26	8.52507e-05	0.00257011	1	1	0	0
centr_pathway_CD27.xlsx	2.10287e-35	GBM	0.854157	2.18307e-05	GBM	0.630801	1.15531e-11	GBM	0.663285	8.4773e-35	3.94594e-05	4.75472e-11	1	1	0	0
centr_pathway_CD274.xlsx	1.25148e-43	GBM	0.823172	8.55797e-10	GBM	0.700174	2.9616e-14	GBM	0.683338	7.73888e-43	2.67742e-09	1.58741e-13	1	1	0	0
centr_pathway_CD28.xlsx	1.33634e-36	GBM	0.850557	1.23735e-05	GBM	0.63922	5.53303e-13	GBM	0.676041	5.67832e-36	2.31201e-05	2.57459e-12	1	1	0	0
centr_pathway_CD2AP.xlsx	1.20532e-42	LGG	0.874229	3.74158e-13	LGG	0.740296	0.000292347	LGG	0.585883	6.91e-42	1.88369e-12	0.000571866	1	1	0	0
centr_pathway_CD2BP2.xlsx	4.52967e-08	GBM	0.650835	1.09961e-12	GBM	0.724919	0.318585	GBM	0.549122	6.28001e-08	5.06038e-12	0.363448	1	0	0	0
centr_pathway_CD300E.xlsx	4.42521e-44	GBM	0.884452	1.54987e-10	GBM	0.701597	1.77131e-15	GBM	0.67905	2.86698e-43	5.27436e-10	1.09987e-14	1	1	0	0
centr_pathway_CD300LB.xlsx	1.50905e-39	GBM	0.828755	8.17127e-11	GBM	0.711282	2.05838e-13	GBM	0.665533	7.45541e-39	2.88493e-10	9.92975e-13	1	1	0	0
centr_pathway_CD302.xlsx	1.67515e-12	GBM	0.68798	0.497391	GBM	0.523559	0.824994	GBM	0.52479	2.8615e-12	0.53605	0.851057	1	0	0	0
centr_pathway_CD34.xlsx	5.47033e-19	LGG	0.710999	0.000120649	LGG	0.606649	4.93877e-08	LGG	0.599046	1.16387e-18	0.000200705	1.39383e-07	1	1	0	0
centr_pathway_CD36.xlsx	5.81164e-38	GBM	0.855161	1.76535e-10	GBM	0.698553	1.10356e-19	GBM	0.723544	2.62472e-37	5.96949e-10	1.14749e-18	1	1	0	0
centr_pathway_CD38.xlsx	1.88548e-05	LGG	0.603104	0.0838321	LGG	0.540873	0.000663165	GBM	0.581541	2.39981e-05	0.101646	0.00124021	0	0	0	0
centr_pathway_CD3D.xlsx	1.82191e-47	GBM	0.842152	2.503e-11	GBM	0.718911	8.74424e-18	GBM	0.709964	1.47291e-46	9.35608e-11	7.2094e-17	1	1	1	1
centr_pathway_CD3E.xlsx	1.995e-08	GBM	0.639633	0.236556	GBM	0.529449	0.00430857	GBM	0.561424	2.81713e-08	0.268506	0.00717132	1	0	0	0
centr_pathway_CD3EAP.xlsx	0.0417648	GBM	0.55566	2.79756e-05	GBM	0.645822	0.0415268	LGG	0.53624	0.0461309	4.98818e-05	0.0581907	0	0	0	0
centr_pathway_CD3G.xlsx	4.57226e-32	GBM	0.791773	0.00390445	GBM	0.59392	4.37369e-06	GBM	0.61036	1.55179e-31	0.00560488	1.02076e-05	1	1	0	0
centr_pathway_CD4.xlsx	4.65624e-41	LGG	0.86827	5.22608e-07	LGG	0.658866	1.62963e-13	LGG	0.675052	2.47736e-40	1.23621e-06	7.96624e-13	1	1	0	0
centr_pathway_CD40.xlsx	6.79997e-33	GBM	0.836996	0.000122298	GBM	0.614436	3.04456e-12	GBM	0.669812	2.38926e-32	0.000203266	1.32091e-11	1	1	0	0
centr_pathway_CD40LG.xlsx	1.57346e-25	GBM	0.774763	0.000135577	GBM	0.618152	2.06075e-11	GBM	0.667637	4.15033e-25	0.000224584	8.22203e-11	1	1	0	0
centr_pathway_CD44.xlsx	3.91097e-56	GBM	0.913129	2.74348e-27	GBM	0.83896	1.927e-42	GBM	0.819467	6.21595e-55	8.17119e-25	1.79331e-39	1	1	1	1
centr_pathway_CD46.xlsx	1.18135e-23	GBM	0.746977	6.52097e-09	GBM	0.705431	2.47719e-06	GBM	0.606589	2.92595e-23	1.86249e-08	5.88095e-06	1	1	0	0
centr_pathway_CD47.xlsx	9.65368e-38	GBM	0.851611	2.24953e-06	GBM	0.654874	1.12048e-13	GBM	0.676104	4.29756e-37	4.93431e-06	5.5539e-13	1	1	0	0
centr_pathway_CD48.xlsx	4.90963e-47	GBM	0.858673	2.19126e-06	GBM	0.651514	4.56377e-17	GBM	0.715299	3.85241e-46	4.81586e-06	3.33437e-16	1	1	0	0
centr_pathway_CD55.xlsx	2.90547e-14	LGG	0.658375	1.68262e-05	LGG	0.644003	0.00536686	LGG	0.570073	5.25008e-14	3.09124e-05	0.0087874	1	1	0	0
centr_pathway_CD59.xlsx	0.000160819	LGG	0.611232	0.0845042	LGG	0.563641	0.00883597	LGG	0.560826	0.000197488	0.102395	0.0140144	1	0	0	0
centr_pathway_CD70.xlsx	3.33414e-32	GBM	0.812974	6.03013e-06	GBM	0.643766	4.1022e-14	GBM	0.688089	1.1383e-31	1.25807e-05	2.1691e-13	1	1	0	0
centr_pathway_CD72.xlsx	2.72668e-23	GBM	0.749109	2.90463e-05	GBM	0.641948	2.3237e-10	GBM	0.648182	6.63895e-23	5.17165e-05	8.24986e-10	1	1	0	0
centr_pathway_CD74.xlsx	5.76468e-37	GBM	0.810778	5.36137e-10	GBM	0.697407	7.5297e-13	GBM	0.661182	2.48914e-36	1.71334e-09	3.45827e-12	1	1	0	0
centr_pathway_CD79A.xlsx	0.14465	GBM	0.544019	0.0111424	GBM	0.582734	0.00621672	GBM	0.567951	0.155562	0.0151675	0.0100529	1	0	0	0
centr_pathway_CD79B.xlsx	0.14465	GBM	0.544019	0.0111424	GBM	0.582734	0.00621672	GBM	0.567951	0.155562	0.0151675	0.0100529	1	0	0	0
centr_pathway_CD80.xlsx	1.66725e-35	GBM	0.827876	2.61977e-06	GBM	0.649972	5.09147e-17	GBM	0.705957	6.75398e-35	5.70541e-06	3.69815e-16	1	1	0	0
centr_pathway_CD81.xlsx	1.80543e-53	GBM	0.893535	5.55342e-17	GBM	0.780655	2.53581e-17	GBM	0.704044	2.22551e-52	5.5208e-16	1.90891e-16	1	1	1	1
centr_pathway_CD82.xlsx	0.093141	GBM	0.544922	0.000968428	GBM	0.591707	0.340155	LGG	0.521635	0.101246	0.00148587	0.386631	0	0	0	0
centr_pathway_CD86.xlsx	2.57809e-35	GBM	0.814793	8.25201e-05	GBM	0.630643	1.16725e-10	GBM	0.657302	1.03595e-34	0.000139901	4.27247e-10	1	1	0	0
centr_pathway_CD8A.xlsx	1.5808e-35	GBM	0.820563	2.73868e-11	GBM	0.714562	7.3446e-12	GBM	0.654056	6.4317e-35	1.01961e-10	3.09629e-11	1	1	0	0
centr_pathway_CD8B.xlsx	2.87543e-36	GBM	0.819108	3.23576e-10	GBM	0.701795	1.15486e-15	GBM	0.692377	1.20198e-35	1.06373e-09	7.40563e-15	1	1	0	0
centr_pathway_CD9.xlsx	0.0465916	GBM	0.548773	0.000516889	GBM	0.608902	1.64679e-08	GBM	0.637077	0.0513332	0.000812145	4.86136e-08	1	0	0	0
centr_pathway_CDA.xlsx	4.50181e-52	GBM	0.887952	9.47283e-19	GBM	0.784054	1.14202e-13	GBM	0.696955	4.84561e-51	1.32834e-17	5.65314e-13	1	1	0	0
centr_pathway_CDC14A.xlsx	2.11677e-23	GBM	0.788938	0.000503141	GBM	0.595146	0.461855	LGG	0.505507	5.17587e-23	0.000792886	0.50858	0	0	0	0
centr_pathway_CDC14B.xlsx	1.8321e-15	GBM	0.723807	0.0528961	GBM	0.543442	0.226392	LGG	0.515652	3.41377e-15	0.0657866	0.268518	0	0	0	0
centr_pathway_CDC16.xlsx	2.0075e-44	GBM	0.838489	6.72983e-14	GBM	0.740454	0.000345799	GBM	0.604767	1.33298e-43	3.74237e-13	0.000669389	1	1	0	0
centr_pathway_CDC20.xlsx	7.89751e-71	GBM	0.90904	9.45072e-18	GBM	0.781287	2.74023e-17	GBM	0.709919	5.36313e-69	1.07738e-16	2.05036e-16	1	1	1	1
centr_pathway_CDC23.xlsx	2.0075e-44	GBM	0.838489	6.72983e-14	GBM	0.740454	0.000345799	GBM	0.604767	1.33298e-43	3.74237e-13	0.000669389	1	1	0	0
centr_pathway_CDC25A.xlsx	1.07435e-58	GBM	0.898427	1.67345e-18	GBM	0.784884	1.01404e-19	GBM	0.71728	2.25432e-57	2.24111e-17	1.05736e-18	1	1	1	1
centr_pathway_CDC25B.xlsx	4.93326e-69	GBM	0.914158	5.9634e-22	GBM	0.803146	6.94569e-30	GBM	0.762236	2.83472e-67	1.71655e-20	2.39401e-28	1	1	1	1
centr_pathway_CDC25C.xlsx	5.15079e-75	GBM	0.929437	1.61921e-23	GBM	0.818365	1.03156e-28	GBM	0.762055	5.82976e-73	8.99748e-22	2.95382e-27	1	1	1	1
centr_pathway_CDC26.xlsx	2.46987e-81	GBM	0.941781	1.41087e-20	GBM	0.790734	1.0078e-05	GBM	0.626533	5.42645e-79	2.87031e-19	2.28195e-05	1	1	0	0
centr_pathway_CDC27.xlsx	2.0075e-44	GBM	0.838489	6.72983e-14	GBM	0.740454	0.000345799	GBM	0.604767	1.33298e-43	3.74237e-13	0.000669389	1	1	0	0
centr_pathway_CDC2L2.xlsx	#NUM!	GBM	0.5	#NUM!	GBM	0.5	#NUM!	GBM	0.5	#NUM!	#NUM!	#NUM!	1	0	0	0
centr_pathway_CDC34.xlsx	1.46548e-33	GBM	0.797845	9.04885e-07	GBM	0.681516	0.00122453	GBM	0.603679	5.27317e-33	2.06048e-06	0.00221492	1	1	0	0
centr_pathway_CDC37.xlsx	0.00226561	GBM	0.591864	0.0285527	GBM	0.560677	0.371076	GBM	0.519042	0.00265352	0.0369423	0.418332	1	0	0	0
centr_pathway_CDC40.xlsx	3.16484e-11	GBM	0.686299	4.16916e-14	GBM	0.743735	0.0368719	GBM	0.569991	5.1675e-11	2.40275e-13	0.0522083	1	0	0	0
centr_pathway_CDC42.xlsx	1.24402e-05	GBM	0.618132	2.51175e-05	GBM	0.647561	1.26288e-05	GBM	0.60832	1.59342e-05	4.50446e-05	2.83282e-05	1	1	0	0
centr_pathway_CDC42BPA.xlsx	0.000133995	GBM	0.622146	9.15139e-06	GBM	0.64851	7.91428e-06	GBM	0.600179	0.000165173	1.85975e-05	1.81019e-05	1	1	0	0
centr_pathway_CDC45.xlsx	4.48008e-59	GBM	0.892845	6.8594e-15	GBM	0.758914	3.55952e-22	GBM	0.735194	9.87204e-58	4.60551e-14	4.79216e-21	1	1	1	1
centr_pathway_CDC5L.xlsx	4.52967e-08	GBM	0.650835	1.09961e-12	GBM	0.724919	0.318585	GBM	0.549122	6.28001e-08	5.06038e-12	0.363448	1	0	0	0
centr_pathway_CDC6.xlsx	6.1877e-59	GBM	0.889495	8.22912e-16	GBM	0.76512	7.866e-19	GBM	0.710753	1.34758e-57	6.66747e-15	7.44121e-18	1	1	1	1
centr_pathway_CDC7.xlsx	1.18471e-56	GBM	0.888053	1.44461e-14	GBM	0.755791	2.18415e-21	GBM	0.731585	1.98426e-55	9.25693e-14	2.6745e-20	1	1	1	1
centr_pathway_CDC73.xlsx	1.39596e-05	GBM	0.616727	0.00372062	GBM	0.585145	0.245604	LGG	0.525026	1.78376e-05	0.0053596	0.289003	0	0	0	0
centr_pathway_CDCA5.xlsx	3.26641e-55	GBM	0.871531	1.37216e-12	GBM	0.73239	1.10602e-17	GBM	0.708504	4.79373e-54	6.15119e-12	8.64045e-17	1	1	1	1
centr_pathway_CDCA8.xlsx	1.79007e-54	GBM	0.868533	1.54137e-12	GBM	0.731481	1.70241e-17	GBM	0.707625	2.4994e-53	6.88486e-12	1.29463e-16	1	1	1	1
centr_pathway_CDH1.xlsx	0.166164	LGG	0.526356	0.000709901	GBM	0.613329	5.91222e-06	GBM	0.604785	0.178135	0.00110055	1.36612e-05	0	0	0	0
centr_pathway_CDH10.xlsx	6.60312e-14	LGG	0.689698	0.00429292	LGG	0.596332	0.033939	LGG	0.551107	1.17497e-13	0.00612358	0.0484889	1	1	0	0
centr_pathway_CDH11.xlsx	6.60312e-14	LGG	0.689698	0.00429292	LGG	0.596332	0.033939	LGG	0.551107	1.17497e-13	0.00612358	0.0484889	1	1	0	0
centr_pathway_CDH12.xlsx	6.60312e-14	LGG	0.689698	0.00429292	LGG	0.596332	0.033939	LGG	0.551107	1.17497e-13	0.00612358	0.0484889	1	1	0	0
centr_pathway_CDH13.xlsx	6.60312e-14	LGG	0.689698	0.00429292	LGG	0.596332	0.033939	LGG	0.551107	1.17497e-13	0.00612358	0.0484889	1	1	0	0
centr_pathway_CDH15.xlsx	5.61674e-24	LGG	0.765041	3.46406e-08	LGG	0.677682	1.60148e-09	LGG	0.637892	1.40513e-23	9.24826e-08	5.2617e-09	1	1	0	0
centr_pathway_CDH16.xlsx	6.04586e-32	GBM	0.826158	1.08252e-06	GBM	0.650605	0.124176	GBM	0.554362	2.03802e-31	2.44403e-06	0.154391	1	0	0	0
centr_pathway_CDH17.xlsx	6.60312e-14	LGG	0.689698	0.00429292	LGG	0.596332	0.033939	LGG	0.551107	1.17497e-13	0.00612358	0.0484889	1	1	0	0
centr_pathway_CDH18.xlsx	6.60312e-14	LGG	0.689698	0.00429292	LGG	0.596332	0.033939	LGG	0.551107	1.17497e-13	0.00612358	0.0484889	1	1	0	0
centr_pathway_CDH19.xlsx	5.95818e-26	GBM	0.78658	2.89071e-07	GBM	0.662622	0.0110018	GBM	0.579274	1.59812e-25	7.03867e-07	0.0172186	1	1	0	0
centr_pathway_CDH2.xlsx	2.76771e-24	LGG	0.760412	5.90972e-06	LGG	0.641395	0.00805895	LGG	0.559575	6.9871e-24	1.2371e-05	0.0128781	1	1	0	0
centr_pathway_CDH20.xlsx	0.385218	GBM	0.521614	0.0130932	LGG	0.604198	9.85636e-05	LGG	0.591404	0.402796	0.0176776	0.000202765	0	0	0	0
centr_pathway_CDH22.xlsx	0.279635	GBM	0.521727	0.246869	LGG	0.554115	0.00318172	LGG	0.568568	0.295414	0.279063	0.00541067	0	0	0	0
centr_pathway_CDH23.xlsx	5.11172e-33	GBM	0.828014	4.36943e-08	GBM	0.678591	0.011406	GBM	0.570762	1.80969e-32	1.15495e-07	0.0178099	1	1	0	0
centr_pathway_CDH24.xlsx	6.60312e-14	LGG	0.689698	0.00429292	LGG	0.596332	0.033939	LGG	0.551107	1.17497e-13	0.00612358	0.0484889	1	1	0	0
centr_pathway_CDH26.xlsx	1.79863e-34	GBM	0.847007	2.6438e-06	GBM	0.643411	0.151872	GBM	0.544852	6.92208e-34	5.75439e-06	0.186151	1	0	0	0
centr_pathway_CDH3.xlsx	6.60312e-14	LGG	0.689698	0.00429292	LGG	0.596332	0.033939	LGG	0.551107	1.17497e-13	0.00612358	0.0484889	1	1	0	0
centr_pathway_CDH4.xlsx	5.61674e-24	LGG	0.765041	3.46406e-08	LGG	0.677682	1.60148e-09	LGG	0.637892	1.40513e-23	9.24826e-08	5.2617e-09	1	1	0	0
centr_pathway_CDH5.xlsx	3.07537e-09	LGG	0.648778	0.762818	GBM	0.517037	0.0469256	GBM	0.540065	4.45646e-09	0.788334	0.0651914	0	0	0	0
centr_pathway_CDH6.xlsx	6.60312e-14	LGG	0.689698	0.00429292	LGG	0.596332	0.033939	LGG	0.551107	1.17497e-13	0.00612358	0.0484889	1	1	0	0
centr_pathway_CDH7.xlsx	6.60312e-14	LGG	0.689698	0.00429292	LGG	0.596332	0.033939	LGG	0.551107	1.17497e-13	0.00612358	0.0484889	1	1	0	0
centr_pathway_CDH8.xlsx	6.60312e-14	LGG	0.689698	0.00429292	LGG	0.596332	0.033939	LGG	0.551107	1.17497e-13	0.00612358	0.0484889	1	1	0	0
centr_pathway_CDH9.xlsx	6.60312e-14	LGG	0.689698	0.00429292	LGG	0.596332	0.033939	LGG	0.551107	1.17497e-13	0.00612358	0.0484889	1	1	0	0
centr_pathway_CDIPT.xlsx	6.72823e-20	LGG	0.747679	2.42362e-09	LGG	0.694007	0.60507	GBM	0.500304	1.4765e-19	7.26794e-09	0.64501	0	0	0	0
centr_pathway_CDK1.xlsx	3.97785e-44	GBM	0.858937	2.99202e-12	GBM	0.733536	4.703e-06	GBM	0.616198	2.58612e-43	1.26943e-11	1.09589e-05	1	1	0	0
centr_pathway_CDK10.xlsx	1.54053e-32	LGG	0.788386	2.38957e-12	LGG	0.733734	5.94563e-13	LGG	0.678941	5.33261e-32	1.03146e-11	2.7614e-12	1	1	0	0
centr_pathway_CDK11A.xlsx	0.828545	LGG	0.508104	1.37178e-05	GBM	0.637995	1.39816e-07	GBM	0.629461	0.834016	2.5472e-05	3.78107e-07	0	0	0	0
centr_pathway_CDK11B.xlsx	0.000699885	LGG	0.588702	0.000140396	GBM	0.614159	1.67513e-05	GBM	0.606181	0.00083865	0.000232412	3.71723e-05	0	1	0	0
centr_pathway_CDK16.xlsx	3.14975e-12	LGG	0.675649	5.60876e-11	LGG	0.710807	0.000994524	LGG	0.582719	5.32442e-12	2.00686e-10	0.00182325	1	1	0	0
centr_pathway_CDK19.xlsx	1.61528e-42	LGG	0.870277	5.75022e-06	LGG	0.659696	9.8494e-12	LGG	0.678126	9.19676e-42	1.20507e-05	4.07835e-11	1	1	0	0
centr_pathway_CDK2.xlsx	1.1135e-82	GBM	0.939272	2.88791e-22	GBM	0.810222	3.87029e-09	GBM	0.661653	2.85762e-80	9.15037e-21	1.21888e-08	1	1	0	0
centr_pathway_CDK3.xlsx	1.42453e-29	LGG	0.782127	2.83391e-12	LGG	0.730176	7.03356e-15	LGG	0.68934	4.28218e-29	1.2051e-11	4.08781e-14	1	1	0	0
centr_pathway_CDK4.xlsx	2.02583e-75	GBM	0.924106	5.11101e-26	GBM	0.823978	2.25372e-18	GBM	0.768628	2.56491e-73	7.83327e-24	2.01428e-17	1	1	1	1
centr_pathway_CDK5.xlsx	1.50592e-17	LGG	0.693123	6.14169e-05	LGG	0.626018	1.00141e-05	LGG	0.604096	3.05437e-17	0.000105298	2.26817e-05	1	1	0	0
centr_pathway_CDK5R1.xlsx	0.000204826	LGG	0.593883	0.29438	GBM	0.530516	0.0127226	LGG	0.556764	0.0002505	0.329221	0.0197662	0	0	0	0
centr_pathway_CDK5RAP2.xlsx	0.74668	GBM	0.530257	9.88092e-06	GBM	0.638667	9.83669e-07	GBM	0.619879	0.755683	1.98686e-05	2.43141e-06	1	0	0	0
centr_pathway_CDK6.xlsx	2.91476e-26	GBM	0.784999	1.97982e-09	GBM	0.698079	2.49239e-09	GBM	0.642335	7.88031e-26	6.00232e-09	8.00857e-09	1	1	0	0
centr_pathway_CDK7.xlsx	1.31338e-05	GBM	0.61832	2.39267e-05	GBM	0.648945	0.153891	GBM	0.531843	1.68111e-05	4.30646e-05	0.188162	1	0	0	0
centr_pathway_CDK8.xlsx	2.20824e-51	LGG	0.904586	3.19298e-09	LGG	0.703732	1.98486e-20	LGG	0.725756	2.27211e-50	9.45326e-09	2.19901e-19	1	1	1	1
centr_pathway_CDK9.xlsx	0.000143151	LGG	0.621557	0.711812	LGG	0.532611	1.0097e-06	LGG	0.602065	0.00017608	0.740349	2.48998e-06	1	0	0	0
centr_pathway_CDKN1A.xlsx	3.10096e-08	GBM	0.644839	0.000508644	GBM	0.612143	0.0113953	GBM	0.54875	4.36142e-08	0.000800372	0.0177969	1	1	0	0
centr_pathway_CDKN1B.xlsx	5.83249e-25	GBM	0.778702	6.10337e-11	GBM	0.706973	1.698e-11	GBM	0.656885	1.49927e-24	2.17965e-10	6.79658e-11	1	1	0	0
centr_pathway_CDKN1C.xlsx	2.98229e-53	GBM	0.880689	2.09789e-15	GBM	0.762353	3.73472e-14	GBM	0.687608	3.62829e-52	1.56679e-14	1.98465e-13	1	1	0	0
centr_pathway_CDKN2A.xlsx	0.00645576	GBM	0.575581	1.06522e-12	GBM	0.728674	8.46303e-05	GBM	0.603044	0.00741232	5.06038e-12	0.000174972	1	1	0	0
centr_pathway_CDKN2B.xlsx	0.00830036	GBM	0.608234	0.000253022	GBM	0.634082	0.146182	GBM	0.554579	0.00946043	0.000408943	0.179651	1	0	0	0
centr_pathway_CDKN2C.xlsx	8.39464e-10	GBM	0.644664	0.659001	GBM	0.502055	2.97273e-06	GBM	0.608284	1.24519e-09	0.69151	7.01935e-06	1	0	0	0
centr_pathway_CDKN2D.xlsx	0.00147857	LGG	0.589505	0.123737	GBM	0.556091	0.367402	LGG	0.504293	0.00174761	0.146828	0.414629	0	0	0	0
centr_pathway_CDO1.xlsx	1.26912e-14	LGG	0.695118	6.53167e-07	LGG	0.662226	1.54799e-07	LGG	0.61803	2.31171e-14	1.50619e-06	4.17113e-07	1	1	0	0
centr_pathway_CDON.xlsx	3.53641e-09	LGG	0.674344	0.000264698	LGG	0.606253	0.00173608	LGG	0.563092	5.11659e-09	0.000427074	0.00308034	1	1	0	0
centr_pathway_CDS1.xlsx	2.34816e-66	LGG	0.900058	2.68992e-17	LGG	0.779034	1.75526e-09	LGG	0.655353	9.7993e-65	2.81308e-16	5.72903e-09	1	1	0	0
centr_pathway_CDS2.xlsx	2.22077e-84	LGG	0.930666	4.54457e-23	LGG	0.801051	1.87157e-09	LGG	0.665189	6.91214e-82	2.27107e-21	6.07935e-09	1	1	0	0
centr_pathway_CDT1.xlsx	1.25341e-66	GBM	0.908049	3.6117e-18	GBM	0.786386	1.08636e-22	GBM	0.733743	5.41213e-65	4.51979e-17	1.52891e-21	1	1	1	1
centr_pathway_CDX1.xlsx	1.17868e-22	GBM	0.784385	2.06223e-08	GBM	0.67701	4.6056e-09	GBM	0.64383	2.81033e-22	5.62056e-08	1.43588e-08	1	1	0	0
centr_pathway_CEBPA.xlsx	1.55745e-16	GBM	0.71189	0.735417	LGG	0.504664	0.0627752	LGG	0.539957	3.00314e-16	0.762768	0.0817065	0	0	0	0
centr_pathway_CEBPB.xlsx	2.91917e-39	GBM	0.894413	1.51063e-06	GBM	0.660408	0.000372297	GBM	0.682667	1.40414e-38	3.37885e-06	0.00071807	1	1	0	0
centr_pathway_CEBPD.xlsx	2.00703e-38	LGG	0.82755	1.3783e-07	LGG	0.6644	0.867193	LGG	0.508943	9.23753e-38	3.48365e-07	0.888801	1	0	0	0
centr_pathway_CEBPG.xlsx	0.592383	GBM	0.5318	0.0268355	GBM	0.568306	0.184701	GBM	0.562059	0.607844	0.0350495	0.222148	1	0	0	0
centr_pathway_CEL.xlsx	0.00482025	LGG	0.590132	0.000402022	LGG	0.61744	0.2797	LGG	0.528226	0.00556784	0.000638399	0.325369	1	0	0	0
centr_pathway_CENPA.xlsx	1.39496e-66	GBM	0.908914	4.86573e-16	GBM	0.765634	3.2093e-18	GBM	0.72591	5.98872e-65	4.09656e-15	2.80437e-17	1	1	1	1
centr_pathway_CENPC.xlsx	7.14369e-54	GBM	0.867743	1.83301e-12	GBM	0.731046	1.48026e-17	GBM	0.707761	9.16897e-53	8.04276e-12	1.14203e-16	1	1	1	1
centr_pathway_CENPE.xlsx	1.31124e-68	GBM	0.890499	8.77397e-17	GBM	0.771405	5.82449e-23	GBM	0.735583	6.9468e-67	8.37576e-16	8.42007e-22	1	1	1	1
centr_pathway_CENPF.xlsx	3.02808e-54	GBM	0.868847	1.37216e-12	GBM	0.73239	1.10602e-17	GBM	0.708504	4.0035e-53	6.15119e-12	8.64045e-17	1	1	1	1
centr_pathway_CENPH.xlsx	5.68792e-66	GBM	0.908437	1.01186e-15	GBM	0.762471	6.87343e-18	GBM	0.72456	2.16779e-64	8.04947e-15	5.72402e-17	1	1	1	1
centr_pathway_CENPI.xlsx	5.68792e-66	GBM	0.908437	1.01186e-15	GBM	0.762471	6.87343e-18	GBM	0.72456	2.16779e-64	8.04947e-15	5.72402e-17	1	1	1	1
centr_pathway_CENPJ.xlsx	0.74668	GBM	0.530257	9.88092e-06	GBM	0.638667	9.83669e-07	GBM	0.619879	0.755683	1.98686e-05	2.43141e-06	1	0	0	0
centr_pathway_CENPK.xlsx	5.68792e-66	GBM	0.908437	1.01186e-15	GBM	0.762471	6.87343e-18	GBM	0.72456	2.16779e-64	8.04947e-15	5.72402e-17	1	1	1	1
centr_pathway_CENPL.xlsx	3.02808e-54	GBM	0.868847	1.37216e-12	GBM	0.73239	1.10602e-17	GBM	0.708504	4.0035e-53	6.15119e-12	8.64045e-17	1	1	1	1
centr_pathway_CENPM.xlsx	3.02808e-54	GBM	0.868847	1.37216e-12	GBM	0.73239	1.10602e-17	GBM	0.708504	4.0035e-53	6.15119e-12	8.64045e-17	1	1	1	1
centr_pathway_CENPN.xlsx	5.68792e-66	GBM	0.908437	1.01186e-15	GBM	0.762471	6.87343e-18	GBM	0.72456	2.16779e-64	8.04947e-15	5.72402e-17	1	1	1	1
centr_pathway_CENPO.xlsx	5.68792e-66	GBM	0.908437	1.01186e-15	GBM	0.762471	6.87343e-18	GBM	0.72456	2.16779e-64	8.04947e-15	5.72402e-17	1	1	1	1
centr_pathway_CENPP.xlsx	5.68792e-66	GBM	0.908437	1.01186e-15	GBM	0.762471	6.87343e-18	GBM	0.72456	2.16779e-64	8.04947e-15	5.72402e-17	1	1	1	1
centr_pathway_CENPQ.xlsx	5.68792e-66	GBM	0.908437	1.01186e-15	GBM	0.762471	6.87343e-18	GBM	0.72456	2.16779e-64	8.04947e-15	5.72402e-17	1	1	1	1
centr_pathway_CENPT.xlsx	3.02808e-54	GBM	0.868847	1.37216e-12	GBM	0.73239	1.10602e-17	GBM	0.708504	4.0035e-53	6.15119e-12	8.64045e-17	1	1	1	1
centr_pathway_CENPU.xlsx	5.68792e-66	GBM	0.908437	1.01186e-15	GBM	0.762471	6.87343e-18	GBM	0.72456	2.16779e-64	8.04947e-15	5.72402e-17	1	1	1	1
centr_pathway_CEP131.xlsx	0.74668	GBM	0.530257	9.88092e-06	GBM	0.638667	9.83669e-07	GBM	0.619879	0.755683	1.98686e-05	2.43141e-06	1	0	0	0
centr_pathway_CEP135.xlsx	0.74668	GBM	0.530257	9.88092e-06	GBM	0.638667	9.83669e-07	GBM	0.619879	0.755683	1.98686e-05	2.43141e-06	1	0	0	0
centr_pathway_CEP152.xlsx	0.74668	GBM	0.530257	9.88092e-06	GBM	0.638667	9.83669e-07	GBM	0.619879	0.755683	1.98686e-05	2.43141e-06	1	0	0	0
centr_pathway_CEP164.xlsx	3.67314e-09	GBM	0.688431	4.16438e-10	GBM	0.712191	1.63933e-11	GBM	0.666667	5.31237e-09	1.34292e-09	6.58295e-11	1	1	0	0
centr_pathway_CEP250.xlsx	0.74668	GBM	0.530257	9.88092e-06	GBM	0.638667	9.83669e-07	GBM	0.619879	0.755683	1.98686e-05	2.43141e-06	1	0	0	0
centr_pathway_CEP290.xlsx	0.74668	GBM	0.530257	9.88092e-06	GBM	0.638667	9.83669e-07	GBM	0.619879	0.755683	1.98686e-05	2.43141e-06	1	0	0	0
centr_pathway_CEP41.xlsx	0.74668	GBM	0.530257	9.88092e-06	GBM	0.638667	9.83669e-07	GBM	0.619879	0.755683	1.98686e-05	2.43141e-06	1	0	0	0
centr_pathway_CEP57.xlsx	0.74668	GBM	0.530257	9.88092e-06	GBM	0.638667	9.83669e-07	GBM	0.619879	0.755683	1.98686e-05	2.43141e-06	1	0	0	0
centr_pathway_CEP63.xlsx	0.74668	GBM	0.530257	9.88092e-06	GBM	0.638667	9.83669e-07	GBM	0.619879	0.755683	1.98686e-05	2.43141e-06	1	0	0	0
centr_pathway_CEP70.xlsx	0.74668	GBM	0.530257	9.88092e-06	GBM	0.638667	9.83669e-07	GBM	0.619879	0.755683	1.98686e-05	2.43141e-06	1	0	0	0
centr_pathway_CEP72.xlsx	0.74668	GBM	0.530257	9.88092e-06	GBM	0.638667	9.83669e-07	GBM	0.619879	0.755683	1.98686e-05	2.43141e-06	1	0	0	0
centr_pathway_CEP76.xlsx	0.74668	GBM	0.530257	9.88092e-06	GBM	0.638667	9.83669e-07	GBM	0.619879	0.755683	1.98686e-05	2.43141e-06	1	0	0	0
centr_pathway_CEP78.xlsx	0.74668	GBM	0.530257	9.88092e-06	GBM	0.638667	9.83669e-07	GBM	0.619879	0.755683	1.98686e-05	2.43141e-06	1	0	0	0
centr_pathway_CEPT1.xlsx	8.00675e-05	LGG	0.595389	0.000331227	LGG	0.624081	0.0642132	LGG	0.543356	9.96342e-05	0.00053039	0.0834324	1	0	0	0
centr_pathway_CER1.xlsx	1.35782e-28	GBM	0.794207	0.000279352	GBM	0.613171	9.27953e-11	GBM	0.663902	3.94511e-28	0.000449548	3.4218e-10	1	1	0	0
centr_pathway_CERK.xlsx	4.82011e-13	LGG	0.700135	3.32686e-08	LGG	0.681753	7.32901e-07	LGG	0.631565	8.34636e-13	8.91016e-08	1.85467e-06	1	1	0	0
centr_pathway_CERS1.xlsx	0.0125453	LGG	0.539202	0.313144	GBM	0.545063	0.538619	LGG	0.502434	0.0141518	0.348478	0.584551	0	0	0	0
centr_pathway_CES1.xlsx	0.345376	GBM	0.544633	0.766211	LGG	0.519685	0.661649	LGG	0.514056	0.362252	0.791401	0.699912	0	0	0	0
centr_pathway_CES2.xlsx	0.345376	GBM	0.544633	0.766211	LGG	0.519685	0.661649	LGG	0.514056	0.362252	0.791401	0.699912	0	0	0	0
centr_pathway_CES4A.xlsx	0.000485304	LGG	0.590446	0.0138866	LGG	0.587952	0.382248	LGG	0.521327	0.00058443	0.0186845	0.429561	1	0	0	0
centr_pathway_CES5A.xlsx	0.000485304	LGG	0.590446	0.0138866	LGG	0.587952	0.382248	LGG	0.521327	0.00058443	0.0186845	0.429561	1	0	0	0
centr_pathway_CETN2.xlsx	0.74668	GBM	0.530257	9.88092e-06	GBM	0.638667	9.83669e-07	GBM	0.619879	0.755683	1.98686e-05	2.43141e-06	1	0	0	0
centr_pathway_CETP.xlsx	3.24817e-08	GBM	0.65983	0.301815	GBM	0.557949	0.16522	GBM	0.577307	4.56173e-08	0.336902	0.200659	1	0	0	0
centr_pathway_CFB.xlsx	8.98574e-16	GBM	0.724748	7.61054e-07	GBM	0.665586	1.35516e-05	GBM	0.607078	1.69119e-15	1.74256e-06	3.02978e-05	1	1	0	0
centr_pathway_CFD.xlsx	1.12973e-37	GBM	0.853229	7.24536e-11	GBM	0.715234	1.57464e-07	GBM	0.625309	5.0203e-37	2.57636e-10	4.23985e-07	1	1	0	0
centr_pathway_CFH.xlsx	2.51724e-21	GBM	0.760425	6.52097e-09	GBM	0.705431	2.47719e-06	GBM	0.606589	5.73287e-21	1.86249e-08	5.88095e-06	1	1	0	0
centr_pathway_CFHR3.xlsx	2.51724e-21	GBM	0.760425	6.52097e-09	GBM	0.705431	2.47719e-06	GBM	0.606589	5.73287e-21	1.86249e-08	5.88095e-06	1	1	0	0
centr_pathway_CFI.xlsx	4.68509e-16	GBM	0.730606	3.71189e-08	GBM	0.685351	3.91955e-05	GBM	0.593933	8.88265e-16	9.84637e-08	8.35414e-05	1	1	0	0
centr_pathway_CFL1.xlsx	5.10066e-46	LGG	0.871883	4.47157e-16	LGG	0.768282	1.08498e-07	LGG	0.626569	3.78371e-45	3.77926e-15	2.96864e-07	1	1	0	0
centr_pathway_CFL2.xlsx	5.98243e-48	LGG	0.877741	3.27912e-20	LGG	0.79366	1.50286e-13	LGG	0.672015	4.99316e-47	6.11937e-19	7.38535e-13	1	1	0	0
centr_pathway_CFLAR.xlsx	4.47216e-38	GBM	0.841889	1.73088e-12	GBM	0.731837	7.19983e-25	GBM	0.744314	2.03329e-37	7.62162e-12	1.2672e-23	1	1	1	1
centr_pathway_CFP.xlsx	1.59683e-19	GBM	0.752785	7.9024e-08	GBM	0.679303	9.63887e-09	GBM	0.638772	3.46251e-19	2.04523e-07	2.91476e-08	1	1	0	0
centr_pathway_CFTR.xlsx	8.53811e-19	LGG	0.735925	2.30564e-07	LGG	0.664321	0.000494167	LGG	0.579682	1.80679e-18	5.66407e-07	0.00093806	1	1	0	0
centr_pathway_CGA.xlsx	0.000651615	GBM	0.582857	0.00105513	GBM	0.609574	0.000468275	GBM	0.609807	0.000781938	0.0016116	0.000891412	1	1	0	0
centr_pathway_CGB8.xlsx	0.000612623	GBM	0.589047	#NUM!	GBM	0.5	#NUM!	GBM	0.5	0.000735621	#NUM!	#NUM!	1	0	0	0
centr_pathway_CGN.xlsx	1.12753e-20	LGG	0.751029	0.686199	LGG	0.510436	0.0540758	LGG	0.536258	2.52252e-20	0.716181	0.0741972	1	0	0	0
centr_pathway_CH25H.xlsx	0.240269	LGG	0.539565	0.000335664	LGG	0.622579	0.095253	LGG	0.54216	0.255053	0.000536918	0.120564	1	0	0	0
centr_pathway_CHAD.xlsx	9.59367e-45	GBM	0.864381	7.72853e-16	GBM	0.767373	9.37187e-26	GBM	0.756316	6.59289e-44	6.29613e-15	1.82176e-24	1	1	1	1
centr_pathway_CHAF1A.xlsx	0.0058712	GBM	0.579131	1.6809e-06	GBM	0.662859	1.078e-10	GBM	0.643939	0.00675984	3.73277e-06	3.9555e-10	1	1	0	0
centr_pathway_CHAT.xlsx	0.0960722	GBM	0.554958	0.621215	GBM	0.502569	0.0545635	LGG	0.545713	0.104402	0.656201	0.0741972	0	0	0	0
centr_pathway_CHD3.xlsx	0.00919034	LGG	0.571981	1.55131e-08	GBM	0.686062	0.255664	LGG	0.527927	0.0104176	4.27341e-08	0.29961	0	0	0	0
centr_pathway_CHD4.xlsx	0.00919034	LGG	0.571981	1.55131e-08	GBM	0.686062	0.255664	LGG	0.527927	0.0104176	4.27341e-08	0.29961	0	0	0	0
centr_pathway_CHD7.xlsx	3.62425e-23	LGG	0.782327	0.291541	LGG	0.557673	0.0212609	LGG	0.564787	8.78429e-23	0.326143	0.0314874	1	0	0	0
centr_pathway_CHD8.xlsx	5.48423e-44	LGG	0.903658	0.137371	LGG	0.592656	2.23126e-05	LGG	0.585158	3.52558e-43	0.161565	4.87577e-05	1	0	0	0
centr_pathway_CHD9.xlsx	1.77487e-39	LGG	0.881555	1.12872e-09	LGG	0.705313	6.24132e-05	LGG	0.605274	8.64293e-39	3.49023e-09	0.000130818	1	1	0	0
centr_pathway_CHDH.xlsx	2.21794e-09	LGG	0.680892	4.34653e-05	LGG	0.648668	0.840503	GBM	0.504166	3.23468e-09	7.59368e-05	0.864779	0	0	0	0
centr_pathway_CHEK1.xlsx	7.15372e-66	GBM	0.896319	9.71255e-19	GBM	0.794094	9.6091e-26	GBM	0.753325	2.7126e-64	1.35939e-17	1.86301e-24	1	1	1	1
centr_pathway_CHEK2.xlsx	1.00197e-75	GBM	0.895165	5.02225e-25	GBM	0.827378	9.76305e-29	GBM	0.762563	1.33655e-73	4.67446e-23	2.81728e-27	1	1	1	1
centr_pathway_CHIA.xlsx	1.06195e-19	GBM	0.743678	1.19049e-15	GBM	0.753498	6.07946e-09	GBM	0.637013	2.31681e-19	9.34076e-15	1.87419e-08	1	1	0	0
centr_pathway_CHIT1.xlsx	6.83851e-25	GBM	0.777171	1.11009e-11	GBM	0.71725	2.05619e-09	GBM	0.641229	1.75425e-24	4.35269e-11	6.6529e-09	1	1	0	0
centr_pathway_CHKA.xlsx	1.76335e-11	LGG	0.684066	2.53634e-06	LGG	0.650644	0.443564	GBM	0.500331	2.91549e-11	5.53343e-06	0.490325	0	0	0	0
centr_pathway_CHKB.xlsx	2.44769e-11	LGG	0.680867	2.06853e-05	LGG	0.636888	0.369686	GBM	0.502724	4.02383e-11	3.75026e-05	0.417017	0	0	0	0
centr_pathway_CHL1.xlsx	1.27324e-05	LGG	0.604207	0.352281	GBM	0.537394	0.025022	GBM	0.544807	1.63001e-05	0.388317	0.0365702	0	0	0	0
centr_pathway_CHMP2A.xlsx	9.97953e-17	GBM	0.742674	0.000104009	GBM	0.644992	0.514746	LGG	0.502434	1.97215e-16	0.000174308	0.560357	0	0	0	0
centr_pathway_CHMP2B.xlsx	9.97953e-17	GBM	0.742674	0.000104009	GBM	0.644992	0.514746	LGG	0.502434	1.97215e-16	0.000174308	0.560357	0	0	0	0
centr_pathway_CHMP3.xlsx	4.20201e-20	GBM	0.779041	0.00240538	GBM	0.614594	0.861567	LGG	0.505516	9.26477e-20	0.00352221	0.884009	0	0	0	0
centr_pathway_CHMP4A.xlsx	9.97953e-17	GBM	0.742674	0.000104009	GBM	0.644992	0.514746	LGG	0.502434	1.97215e-16	0.000174308	0.560357	0	0	0	0
centr_pathway_CHMP4B.xlsx	9.97953e-17	GBM	0.742674	0.000104009	GBM	0.644992	0.514746	LGG	0.502434	1.97215e-16	0.000174308	0.560357	0	0	0	0
centr_pathway_CHMP4C.xlsx	9.97953e-17	GBM	0.742674	0.000104009	GBM	0.644992	0.514746	LGG	0.502434	1.97215e-16	0.000174308	0.560357	0	0	0	0
centr_pathway_CHMP5.xlsx	3.41448e-16	GBM	0.738371	0.000180139	GBM	0.637956	0.510406	LGG	0.503395	6.50005e-16	0.000294924	0.556528	0	0	0	0
centr_pathway_CHMP6.xlsx	9.97953e-17	GBM	0.742674	0.000104009	GBM	0.644992	0.514746	LGG	0.502434	1.97215e-16	0.000174308	0.560357	0	0	0	0
centr_pathway_CHMP7.xlsx	9.97953e-17	GBM	0.742674	0.000104009	GBM	0.644992	0.514746	LGG	0.502434	1.97215e-16	0.000174308	0.560357	0	0	0	0
centr_pathway_CHN1.xlsx	1.348e-56	GBM	0.889395	2.8791e-13	GBM	0.726658	1.51338e-06	GBM	0.612309	2.24766e-55	1.46433e-12	3.67965e-06	1	1	0	0
centr_pathway_CHN2.xlsx	2.37711e-50	GBM	0.862512	2.25711e-10	GBM	0.695668	9.21167e-06	GBM	0.603588	2.2909e-49	7.53314e-10	2.09471e-05	1	1	0	0
centr_pathway_CHP1.xlsx	1.35607e-31	GBM	0.812836	1.24373e-10	GBM	0.709186	1.11401e-18	GBM	0.708486	4.46838e-31	4.27357e-10	1.03285e-17	1	1	1	1
centr_pathway_CHPF.xlsx	0.00152037	GBM	0.60624	0.35188	GBM	0.532848	0.164574	LGG	0.51645	0.00179559	0.387933	0.199976	0	0	0	0
centr_pathway_CHPF2.xlsx	0.00152037	GBM	0.60624	0.35188	GBM	0.532848	0.164574	LGG	0.51645	0.00179559	0.387933	0.199976	0	0	0	0
centr_pathway_CHPT1.xlsx	0.000439389	LGG	0.584011	0.000602599	LGG	0.617163	0.13177	LGG	0.537736	0.000530505	0.000941451	0.163233	1	0	0	0
centr_pathway_CHRD.xlsx	0.0899046	GBM	0.551081	5.31472e-20	LGG	0.787058	5.88869e-09	LGG	0.646795	0.0977993	9.5588e-19	1.81688e-08	0	0	0	0
centr_pathway_CHRDL1.xlsx	7.02034e-37	LGG	0.829507	9.36454e-25	LGG	0.809708	1.98332e-15	LGG	0.680419	3.01217e-36	7.57917e-23	1.2264e-14	1	1	0	0
centr_pathway_CHRM1.xlsx	0.00200982	LGG	0.598349	2.57086e-05	LGG	0.635663	0.000249369	LGG	0.591304	0.00236059	4.60381e-05	0.000491542	1	1	0	0
centr_pathway_CHRM2.xlsx	0.000704398	LGG	0.597546	0.000536442	LGG	0.612618	0.0128832	LGG	0.557907	0.000843786	0.000842333	0.0199949	1	1	0	0
centr_pathway_CHRM3.xlsx	1.73036e-08	GBM	0.645404	0.753957	GBM	0.526326	0.948566	GBM	0.518961	2.44946e-08	0.780042	0.958999	1	0	0	0
centr_pathway_CHRM4.xlsx	0.151462	LGG	0.539591	0.000377055	LGG	0.615147	0.00574107	LGG	0.560599	0.162654	0.000600289	0.00935893	1	0	0	0
centr_pathway_CHRM5.xlsx	0.000539777	GBM	0.596794	0.985692	LGG	0.510277	0.888241	LGG	0.515235	0.000649088	0.986885	0.907501	0	0	0	0
centr_pathway_CHRNA1.xlsx	7.99683e-29	GBM	0.81897	2.56562e-06	GBM	0.668077	3.9134e-10	GBM	0.669803	2.33802e-28	5.5924e-06	1.35639e-09	1	1	0	0
centr_pathway_CHRNA3.xlsx	0.321134	LGG	0.532177	0.331385	LGG	0.546249	0.832276	GBM	0.51092	0.338107	0.367487	0.857144	0	0	0	0
centr_pathway_CHRNA4.xlsx	2.63651e-56	LGG	0.89785	6.75976e-24	LGG	0.809985	1.05966e-29	LGG	0.761819	4.24456e-55	4.33282e-22	3.52196e-28	1	1	1	1
centr_pathway_CHRNA6.xlsx	5.21046e-12	GBM	0.689523	0.901665	GBM	0.503399	0.00903369	GBM	0.547554	8.75244e-12	0.913566	0.0143158	1	0	0	0
centr_pathway_CHRNA7.xlsx	1.31646e-06	LGG	0.647235	2.12822e-08	LGG	0.69543	0.00673783	LGG	0.559547	1.73991e-06	5.79404e-08	0.0108508	1	1	0	0
centr_pathway_CHRNB1.xlsx	6.93659e-05	LGG	0.589493	0.00249518	LGG	0.581667	0.45086	GBM	0.50994	8.64903e-05	0.0036494	0.497872	0	0	0	0
centr_pathway_CHRNB2.xlsx	2.63651e-56	LGG	0.89785	6.75976e-24	LGG	0.809985	1.05966e-29	LGG	0.761819	4.24456e-55	4.33282e-22	3.52196e-28	1	1	1	1
centr_pathway_CHRNB4.xlsx	3.44062e-09	GBM	0.670091	0.813594	LGG	0.517511	0.0779814	GBM	0.544535	4.97993e-09	0.833519	0.0998575	0	0	0	0
centr_pathway_CHRNG.xlsx	3.87531e-16	LGG	0.710598	0.013659	LGG	0.565302	0.594459	GBM	0.507529	7.36793e-16	0.0183982	0.636706	0	0	0	0
centr_pathway_CHST1.xlsx	1.86491e-12	GBM	0.695921	0.022905	GBM	0.567476	0.00030839	GBM	0.591277	3.18057e-12	0.0301166	0.000601668	1	1	0	0
centr_pathway_CHST11.xlsx	0.491779	GBM	0.534924	0.32127	LGG	0.526049	0.00101979	LGG	0.560255	0.508737	0.356934	0.00186497	0	0	0	0
centr_pathway_CHST12.xlsx	0.491779	GBM	0.534924	0.32127	LGG	0.526049	0.00101979	LGG	0.560255	0.508737	0.356934	0.00186497	0	0	0	0
centr_pathway_CHST13.xlsx	0.491779	GBM	0.534924	0.32127	LGG	0.526049	0.00101979	LGG	0.560255	0.508737	0.356934	0.00186497	0	0	0	0
centr_pathway_CHST14.xlsx	0.505509	GBM	0.523521	0.40499	LGG	0.526247	0.000163853	LGG	0.573037	0.521352	0.442423	0.000330234	0	0	0	0
centr_pathway_CHST15.xlsx	0.000454935	LGG	0.590873	0.00702402	LGG	0.583683	2.10413e-07	LGG	0.608511	0.000548565	0.00975762	5.59674e-07	1	1	0	0
centr_pathway_CHST2.xlsx	1.7182e-21	GBM	0.775127	7.51878e-06	GBM	0.650368	2.56735e-14	GBM	0.696592	3.92626e-21	1.54697e-05	1.3901e-13	1	1	0	0
centr_pathway_CHST3.xlsx	0.574447	GBM	0.526243	0.47036	LGG	0.522294	0.0160683	LGG	0.54642	0.5909	0.508464	0.0246301	0	0	0	0
centr_pathway_CHST5.xlsx	1.34904e-16	GBM	0.738145	0.000149197	GBM	0.623804	8.64593e-09	GBM	0.653494	2.65473e-16	0.000246106	2.62623e-08	1	1	0	0
centr_pathway_CHST6.xlsx	2.19265e-23	GBM	0.784234	5.33177e-05	GBM	0.630406	2.45498e-13	GBM	0.695432	5.35964e-23	9.21549e-05	1.17463e-12	1	1	0	0
centr_pathway_CHST7.xlsx	0.574447	GBM	0.526243	0.47036	LGG	0.522294	0.0160683	LGG	0.54642	0.5909	0.508464	0.0246301	0	0	0	0
centr_pathway_CHSY1.xlsx	0.00152037	GBM	0.60624	0.35188	GBM	0.532848	0.164574	LGG	0.51645	0.00179559	0.387933	0.199976	0	0	0	0
centr_pathway_CHSY3.xlsx	0.00152037	GBM	0.60624	0.35188	GBM	0.532848	0.164574	LGG	0.51645	0.00179559	0.387933	0.199976	0	0	0	0
centr_pathway_CHUK.xlsx	3.26772e-08	GBM	0.645379	8.04654e-07	GBM	0.663254	2.36895e-13	GBM	0.672677	4.58745e-08	1.83956e-06	1.1342e-12	1	1	0	0
centr_pathway_CIAO1.xlsx	2.172e-25	GBM	0.776406	1.27242e-18	GBM	0.787572	0.000339683	GBM	0.596308	5.70093e-25	1.73525e-17	0.000659608	1	1	0	0
centr_pathway_CIAPIN1.xlsx	1.18819e-16	GBM	0.735097	2.01361e-06	GBM	0.640011	0.725029	LGG	0.506251	2.34128e-16	4.44378e-06	0.758124	0	0	0	0
centr_pathway_CIITA.xlsx	4.50975e-12	LGG	0.667595	0.00252517	LGG	0.604277	6.5023e-09	LGG	0.63462	7.59077e-12	0.00368965	2.0004e-08	1	1	0	0
centr_pathway_CIR1.xlsx	0.0430577	GBM	0.587398	0.0917097	GBM	0.555538	0.000361587	GBM	0.57689	0.0475308	0.110676	0.00069868	1	0	0	0
centr_pathway_CISH.xlsx	3.90489e-60	GBM	0.885569	2.15899e-13	GBM	0.74243	9.28577e-35	GBM	0.785952	9.56378e-59	1.11793e-12	1.06358e-32	1	1	1	1
centr_pathway_CIT.xlsx	4.52451e-05	LGG	0.618295	6.94359e-06	LGG	0.647877	0.00492767	LGG	0.564135	5.68513e-05	1.43776e-05	0.00813809	1	1	0	0
centr_pathway_CITED1.xlsx	3.10895e-38	LGG	0.835692	0.000813627	LGG	0.625109	0.164399	LGG	0.537473	1.42303e-37	0.0012556	0.199894	1	0	0	0
centr_pathway_CITED2.xlsx	0.0583335	LGG	0.548121	0.00291448	GBM	0.617322	0.000267034	GBM	0.573853	0.0639306	0.0042319	0.000524216	0	0	0	0
centr_pathway_CKAP5.xlsx	9.15849e-40	GBM	0.833484	5.9082e-13	GBM	0.73994	3.79096e-18	GBM	0.711369	4.57312e-39	2.89614e-12	3.27802e-17	1	1	1	1
centr_pathway_CKB.xlsx	0.000116934	LGG	0.598261	0.000103304	LGG	0.600798	9.44636e-06	LGG	0.588086	0.000144811	0.000173439	2.1448e-05	1	1	0	0
centr_pathway_CKM.xlsx	0.000521945	LGG	0.589982	2.79077e-09	LGG	0.696577	1.3913e-07	LGG	0.623487	0.000627846	8.30872e-09	3.76617e-07	1	1	0	0
centr_pathway_CKMT1A.xlsx	0.000521945	LGG	0.589982	2.79077e-09	LGG	0.696577	1.3913e-07	LGG	0.623487	0.000627846	8.30872e-09	3.76617e-07	1	1	0	0
centr_pathway_CKMT1B.xlsx	4.23512e-18	LGG	0.742599	1.01755e-12	LGG	0.729939	4.59853e-13	LGG	0.669967	8.75142e-18	4.85996e-12	2.15186e-12	1	1	0	0
centr_pathway_CKMT2.xlsx	0.000521945	LGG	0.589982	2.79077e-09	LGG	0.696577	1.3913e-07	LGG	0.623487	0.000627846	8.30872e-09	3.76617e-07	1	1	0	0
centr_pathway_CKS1B.xlsx	1.10811e-66	GBM	0.965176	7.20375e-23	GBM	0.815479	0.000233903	GBM	0.615482	4.84071e-65	2.9311e-21	0.000462526	1	1	0	0
centr_pathway_CLASP1.xlsx	2.05102e-37	GBM	0.827312	4.45832e-12	GBM	0.727765	2.94688e-17	GBM	0.705839	9.02305e-37	1.84734e-11	2.19107e-16	1	1	1	1
centr_pathway_CLASP2.xlsx	2.1745e-52	GBM	0.864707	2.07837e-12	GBM	0.7299	1.10803e-17	GBM	0.708776	2.40289e-51	9.05915e-12	8.64709e-17	1	1	1	1
centr_pathway_CLCA1.xlsx	0.000541514	LGG	0.583948	0.00423055	LGG	0.581667	0.496515	GBM	0.524128	0.000651072	0.00604968	0.543531	0	0	0	0
centr_pathway_CLCA2.xlsx	3.25994e-05	LGG	0.60215	0.00245124	LGG	0.586766	0.548888	GBM	0.522288	4.11417e-05	0.00358654	0.595175	0	0	0	0
centr_pathway_CLCA3P.xlsx	0.542545	GBM	0.501229	8.75149e-06	LGG	0.621472	0.0296316	LGG	0.563355	0.558854	1.78189e-05	0.0428032	0	0	0	0
centr_pathway_CLCA4.xlsx	3.47348e-12	LGG	0.677618	3.44802e-06	LGG	0.639853	0.72596	LGG	0.502498	5.86636e-12	7.42881e-06	0.75899	1	0	0	0
centr_pathway_CLCF1.xlsx	1.10784e-34	GBM	0.834224	8.01316e-08	GBM	0.673176	9.00847e-18	GBM	0.702838	4.32823e-34	2.07246e-07	7.41084e-17	1	1	0	0
centr_pathway_CLCN1.xlsx	0.854655	GBM	0.513598	1.40556e-05	LGG	0.616531	0.0332282	LGG	0.560844	0.859371	2.60798e-05	0.0476379	0	0	0	0
centr_pathway_CLCN2.xlsx	0.00135559	LGG	0.573235	0.00165911	LGG	0.597399	0.353709	LGG	0.522641	0.0016053	0.0024668	0.400633	1	0	0	0
centr_pathway_CLCN3.xlsx	4.72948e-21	LGG	0.736289	3.56792e-10	LGG	0.68879	0.00617731	LGG	0.569266	1.06929e-20	1.1647e-09	0.00999784	1	1	0	0
centr_pathway_CLCN4.xlsx	8.53747e-17	LGG	0.699772	2.32367e-07	LGG	0.664242	0.0573755	LGG	0.550563	1.69299e-16	5.70461e-07	0.0751514	1	0	0	0
centr_pathway_CLCN5.xlsx	4.18515e-07	LGG	0.637626	0.000287617	LGG	0.590086	0.154389	LGG	0.540473	5.61679e-07	0.000462547	0.188709	1	0	0	0
centr_pathway_CLCN6.xlsx	8.78308e-28	LGG	0.775566	2.76774e-10	LGG	0.696261	3.97512e-05	LGG	0.609009	2.48615e-27	9.15938e-10	8.46049e-05	1	1	0	0
centr_pathway_CLCN7.xlsx	2.17851e-12	LGG	0.671484	4.97921e-06	LGG	0.633607	0.0081741	LGG	0.573663	3.70779e-12	1.05838e-05	0.0130285	1	1	0	0
centr_pathway_CLCNKA.xlsx	0.00159691	GBM	0.587348	0.000163346	LGG	0.603131	0.476751	LGG	0.524853	0.00188451	0.000268434	0.523976	0	0	0	0
centr_pathway_CLCNKB.xlsx	4.07575e-14	GBM	0.693587	0.000248481	LGG	0.59226	0.53618	LGG	0.524237	7.33458e-14	0.000401865	0.582243	0	0	0	0
centr_pathway_CLDN1.xlsx	1.9776e-13	LGG	0.701114	1.29634e-17	LGG	0.76255	4.56257e-05	LGG	0.588349	3.46046e-13	1.43425e-16	9.67759e-05	1	1	0	0
centr_pathway_CLDN10.xlsx	6.83915e-43	LGG	0.854107	1.19296e-19	LGG	0.783066	5.56912e-10	LGG	0.640812	3.99753e-42	2.00515e-18	1.90718e-09	1	1	0	0
centr_pathway_CLDN11.xlsx	1.54278e-54	LGG	0.887752	1.45733e-16	LGG	0.761483	3.12609e-07	LGG	0.620894	2.15816e-53	1.32819e-15	8.18057e-07	1	1	0	0
centr_pathway_CLDN14.xlsx	9.3377e-47	LGG	0.876323	1.50518e-24	LGG	0.812633	1.9405e-13	LGG	0.663331	7.18679e-46	1.10966e-22	9.41174e-13	1	1	0	0
centr_pathway_CLDN15.xlsx	3.25141e-59	LGG	0.91915	5.06255e-22	LGG	0.791881	1.26882e-15	LGG	0.677147	7.25015e-58	1.5386e-20	8.10847e-15	1	1	0	0
centr_pathway_CLDN16.xlsx	1.835e-64	LGG	0.919452	3.33018e-26	LGG	0.821172	3.72255e-14	LGG	0.665597	6.20247e-63	5.76662e-24	1.9796e-13	1	1	0	0
centr_pathway_CLDN17.xlsx	3.92966e-70	LGG	0.936876	8.59597e-25	LGG	0.814254	5.60729e-14	LGG	0.664255	2.50894e-68	7.11173e-23	2.9051e-13	1	1	0	0
centr_pathway_CLDN18.xlsx	1.99185e-51	LGG	0.902818	3.23093e-25	LGG	0.818405	2.60207e-13	LGG	0.660638	2.06082e-50	3.29555e-23	1.24262e-12	1	1	0	0
centr_pathway_CLDN19.xlsx	2.09462e-52	LGG	0.89928	8.59597e-25	LGG	0.814254	5.60729e-14	LGG	0.664255	2.32494e-51	7.11173e-23	2.9051e-13	1	1	0	0
centr_pathway_CLDN2.xlsx	2.08711e-71	LGG	0.929136	2.13969e-25	LGG	0.818444	8.78332e-14	LGG	0.662605	1.49911e-69	2.37793e-23	4.42734e-13	1	1	0	0
centr_pathway_CLDN20.xlsx	2.88389e-56	LGG	0.909667	1.62992e-24	LGG	0.81212	3.08046e-13	LGG	0.662143	4.63284e-55	1.18984e-22	1.45984e-12	1	1	0	0
centr_pathway_CLDN22.xlsx	8.08533e-72	LGG	0.938645	8.59597e-25	LGG	0.814254	1.96948e-16	LGG	0.681507	6.35762e-70	7.11173e-23	1.36018e-15	1	1	0	0
centr_pathway_CLDN23.xlsx	1.16355e-33	LGG	0.813776	6.86407e-22	LGG	0.797336	4.44318e-08	LGG	0.620196	4.21518e-33	1.95823e-20	1.26741e-07	1	1	0	0
centr_pathway_CLDN24.xlsx	3.38856e-71	LGG	0.936412	8.59597e-25	LGG	0.814254	5.60729e-14	LGG	0.664255	2.36566e-69	7.11173e-23	2.9051e-13	1	1	0	0
centr_pathway_CLDN25.xlsx	2.5079e-70	LGG	0.934718	8.59597e-25	LGG	0.814254	5.60729e-14	LGG	0.664255	1.65788e-68	7.11173e-23	2.9051e-13	1	1	0	0
centr_pathway_CLDN3.xlsx	2.98479e-54	LGG	0.895165	4.44363e-24	LGG	0.810538	1.51727e-13	LGG	0.66372	4.0035e-53	3.06364e-22	7.45122e-13	1	1	0	0
centr_pathway_CLDN4.xlsx	9.75455e-45	LGG	0.871707	9.86602e-23	LGG	0.802158	6.21828e-11	LGG	0.643268	6.69729e-44	3.74808e-21	2.34287e-10	1	1	0	0
centr_pathway_CLDN5.xlsx	4.79905e-57	LGG	0.921822	8.91243e-22	LGG	0.800182	1.00576e-20	LGG	0.724687	8.53545e-56	2.44878e-20	1.14494e-19	1	1	1	1
centr_pathway_CLDN6.xlsx	8.7321e-56	LGG	0.914271	2.62275e-25	LGG	0.815717	2.3135e-14	LGG	0.667736	1.34492e-54	2.87191e-23	1.26368e-13	1	1	0	0
centr_pathway_CLDN7.xlsx	3.50741e-49	LGG	0.852903	2.2114e-18	LGG	0.769863	6.23169e-08	LGG	0.618474	3.08603e-48	2.88373e-17	1.73894e-07	1	1	0	0
centr_pathway_CLDN8.xlsx	1.57089e-74	LGG	0.938645	8.59597e-25	LGG	0.814254	5.60729e-14	LGG	0.664255	1.65275e-72	7.11173e-23	2.9051e-13	1	1	0	0
centr_pathway_CLDN9.xlsx	5.9804e-68	LGG	0.942897	2.07534e-25	LGG	0.815835	1.26888e-22	LGG	0.722747	3.01848e-66	2.34136e-23	1.76907e-21	1	1	1	1
centr_pathway_CLEC11A.xlsx	5.91526e-09	GBM	0.655314	0.00407646	GBM	0.588386	1.00223e-07	GBM	0.645498	8.49749e-09	0.00583717	2.74829e-07	1	1	0	0
centr_pathway_CLEC14A.xlsx	0.43216	LGG	0.513222	0.958406	LGG	0.502293	0.233096	GBM	0.54497	0.449239	0.962283	0.275592	0	0	0	0
centr_pathway_CLEC4M.xlsx	2.99838e-56	GBM	0.877064	3.11015e-12	GBM	0.728793	6.31146e-24	GBM	0.733181	4.80642e-55	1.3158e-11	1.01051e-22	1	1	1	1
centr_pathway_CLEC5A.xlsx	1.08438e-84	GBM	0.92245	2.78532e-18	GBM	0.779666	3.82794e-26	GBM	0.744441	3.68196e-82	3.58815e-17	7.93845e-25	1	1	1	1
centr_pathway_CLEC7A.xlsx	0.87637	GBM	0.509333	0.000501727	GBM	0.611906	0.012398	GBM	0.552041	0.880732	0.000790993	0.0192981	1	0	0	0
centr_pathway_CLIC1.xlsx	9.34187e-47	GBM	0.850795	5.21577e-14	GBM	0.74081	5.31904e-30	GBM	0.755201	7.18679e-46	2.97827e-13	1.85048e-28	1	1	1	1
centr_pathway_CLIC2.xlsx	0.143834	GBM	0.52874	0.134425	LGG	0.527789	0.971621	GBM	0.507819	0.154752	0.158275	0.978191	0	0	0	0
centr_pathway_CLIC5.xlsx	1.39677e-28	LGG	0.794395	1.04766e-10	LGG	0.699067	0.00100667	LGG	0.583753	4.05198e-28	3.64188e-10	0.00184371	1	1	0	0
centr_pathway_CLIC6.xlsx	2.74723e-07	GBM	0.644124	0.0602023	LGG	0.547988	0.832716	LGG	0.509197	3.70563e-07	0.0743393	0.857479	0	0	0	0
centr_pathway_CLINT1.xlsx	1.35337e-13	GBM	0.710711	0.000119276	GBM	0.61661	0.0224168	GBM	0.547155	2.38099e-13	0.00019862	0.0330285	1	1	0	0
centr_pathway_CLIP1.xlsx	7.16191e-53	GBM	0.865824	8.18247e-12	GBM	0.725077	1.43385e-16	GBM	0.701297	8.34625e-52	3.2616e-11	1.00047e-15	1	1	1	1
centr_pathway_CLNS1A.xlsx	5.00675e-36	GBM	0.871343	2.125e-13	GBM	0.74247	0.014315	GBM	0.59047	2.08127e-35	1.10263e-12	0.0221018	1	1	0	0
centr_pathway_CLOCK.xlsx	2.86661e-45	GBM	0.867191	0.0136206	GBM	0.599375	7.17179e-06	GBM	0.643196	2.01825e-44	0.0183497	1.64644e-05	1	1	0	0
centr_pathway_CLP1.xlsx	4.52967e-08	GBM	0.650835	1.09961e-12	GBM	0.724919	0.318585	GBM	0.549122	6.28001e-08	5.06038e-12	0.363448	1	0	0	0
centr_pathway_CLSPN.xlsx	3.1147e-58	GBM	0.890085	2.27029e-16	GBM	0.773895	4.0818e-21	GBM	0.730625	6.10677e-57	1.99582e-15	4.82365e-20	1	1	1	1
centr_pathway_CLTA.xlsx	3.451e-15	GBM	0.693562	3.24428e-06	GBM	0.642976	1.158e-10	GBM	0.645245	6.37935e-15	7.01217e-06	4.24069e-10	1	1	0	0
centr_pathway_CLTB.xlsx	9.15778e-17	GBM	0.722277	2.6165e-07	GBM	0.665072	3.04276e-11	GBM	0.656006	1.81359e-16	6.39399e-07	1.18978e-10	1	1	0	0
centr_pathway_CLTC.xlsx	1.191e-23	GBM	0.769682	1.43288e-07	GBM	0.671436	1.59112e-06	GBM	0.626343	2.94887e-23	3.61302e-07	3.86186e-06	1	1	0	0
centr_pathway_CLTCL1.xlsx	0.0829209	LGG	0.515242	0.83692	LGG	0.52012	0.106298	LGG	0.529051	0.090413	0.854595	0.133681	1	0	0	0
centr_pathway_CMA1.xlsx	8.36692e-11	LGG	0.676978	0.000101437	LGG	0.6376	0.0154236	LGG	0.569003	1.34816e-10	0.000170381	0.0236956	1	1	0	0
centr_pathway_CMAS.xlsx	4.5947e-43	GBM	0.84727	5.66657e-09	GBM	0.691833	7.52958e-06	GBM	0.642471	2.70468e-42	1.63413e-08	1.72751e-05	1	1	0	0
centr_pathway_CMPK1.xlsx	1.57085e-17	GBM	0.742047	0.0177559	GBM	0.572377	1.37636e-06	GBM	0.594894	3.18432e-17	0.0236343	3.35856e-06	1	1	0	0
centr_pathway_CMPK2.xlsx	1.57085e-17	GBM	0.742047	0.0177559	GBM	0.572377	1.37636e-06	GBM	0.594894	3.18432e-17	0.0236343	3.35856e-06	1	1	0	0
centr_pathway_CMTR1.xlsx	2.95546e-05	LGG	0.667482	0.143193	LGG	0.568978	0.0266944	LGG	0.565295	3.73558e-05	0.167987	0.0387861	1	0	0	0
centr_pathway_CMTR2.xlsx	1.01047e-09	GBM	0.668385	0.00818425	GBM	0.589256	0.0517357	GBM	0.545133	1.4941e-09	0.0112747	0.0713414	1	0	0	0
centr_pathway_CNDP1.xlsx	9.72317e-09	LGG	0.649631	1.50268e-12	LGG	0.728556	3.78793e-06	LGG	0.613452	1.38743e-08	6.71607e-12	8.88504e-06	1	1	0	0
centr_pathway_CNDP2.xlsx	5.30531e-05	LGG	0.605123	6.0768e-09	LGG	0.693138	0.00226995	LGG	0.577878	6.64944e-05	1.74298e-08	0.00392106	1	1	0	0
centr_pathway_CNEP1R1.xlsx	0.409099	GBM	0.520974	0.0100698	LGG	0.603842	0.0261205	GBM	0.539485	0.426573	0.0137502	0.0380041	0	0	0	0
centr_pathway_CNGA1.xlsx	3.45483e-33	LGG	0.829695	3.58589e-14	LGG	0.740612	8.08219e-11	LGG	0.662868	1.22776e-32	2.10905e-13	3.0101e-10	1	1	0	0
centr_pathway_CNGA2.xlsx	5.84412e-33	LGG	0.848048	1.30234e-15	LGG	0.754407	1.28552e-11	LGG	0.669332	2.06117e-32	1.01755e-14	5.24421e-11	1	1	0	0
centr_pathway_CNGA3.xlsx	1.09433e-23	LGG	0.748884	7.56011e-14	LGG	0.737845	3.8798e-09	LGG	0.642271	2.71312e-23	4.18843e-13	1.22136e-08	1	1	0	0
centr_pathway_CNGA4.xlsx	2.36003e-36	LGG	0.821366	8.43105e-17	LGG	0.771286	8.25011e-14	LGG	0.690391	9.89861e-36	8.08989e-16	4.1955e-13	1	1	0	0
centr_pathway_CNGB1.xlsx	3.7339e-28	LGG	0.770046	3.38167e-14	LGG	0.748162	1.45251e-11	LGG	0.678253	1.06622e-27	2e-13	5.88994e-11	1	1	0	0
centr_pathway_CNGB3.xlsx	2.48034e-36	LGG	0.858648	1.10644e-15	LGG	0.754605	1.28552e-11	LGG	0.669332	1.03974e-35	8.72756e-15	5.24421e-11	1	1	0	0
centr_pathway_CNKSR1.xlsx	0.018788	LGG	0.553816	0.831761	LGG	0.502688	0.0197382	LGG	0.548904	0.0210667	0.849909	0.0294491	1	0	0	0
centr_pathway_CNOT1.xlsx	4.31309e-08	GBM	0.634979	0.000345828	GBM	0.629141	0.202547	LGG	0.528597	6.04027e-08	0.000552583	0.242009	0	0	0	0
centr_pathway_CNOT10.xlsx	2.84876e-17	GBM	0.713094	1.34292e-05	GBM	0.649024	0.236538	LGG	0.52489	5.72973e-17	2.49985e-05	0.279041	0	0	0	0
centr_pathway_CNOT11.xlsx	1.72652e-20	GBM	0.742084	3.4323e-06	GBM	0.658076	0.571621	LGG	0.512542	3.84186e-20	7.39856e-06	0.615077	0	0	0	0
centr_pathway_CNOT2.xlsx	1.74968e-13	GBM	0.684279	2.29962e-05	GBM	0.645861	0.386817	LGG	0.520447	3.06595e-13	4.14499e-05	0.434171	0	0	0	0
centr_pathway_CNOT3.xlsx	9.34345e-19	GBM	0.727683	1.64085e-07	GBM	0.678275	0.205098	LGG	0.523475	1.97609e-18	4.09718e-07	0.244783	0	0	0	0
centr_pathway_CNOT4.xlsx	4.48211e-10	GBM	0.65288	0.000805433	GBM	0.616729	0.0909926	LGG	0.537174	6.69225e-10	0.00124321	0.115584	0	0	0	0
centr_pathway_CNOT6.xlsx	2.00632e-05	GBM	0.598713	0.00152536	GBM	0.606095	0.0253461	LGG	0.55186	2.55231e-05	0.00227384	0.0370149	0	1	0	0
centr_pathway_CNOT6L.xlsx	0.000138834	GBM	0.588188	0.0121245	GBM	0.586766	0.0808438	LGG	0.540999	0.000170996	0.0164533	0.103363	0	0	0	0
centr_pathway_CNOT7.xlsx	1.13733e-11	GBM	0.670204	0.000418242	GBM	0.62499	0.296579	LGG	0.523484	1.89175e-11	0.000663322	0.343555	0	0	0	0
centr_pathway_CNOT8.xlsx	5.06812e-11	GBM	0.659491	0.0103996	GBM	0.589928	0.0515148	LGG	0.545206	8.22125e-11	0.0141901	0.0710499	0	0	0	0
centr_pathway_CNPY3.xlsx	1.60199e-19	GBM	0.726981	6.24416e-07	GBM	0.666812	1.39361e-05	GBM	0.594858	3.47269e-19	1.44302e-06	3.11108e-05	1	1	0	0
centr_pathway_CNR1.xlsx	0.00107722	GBM	0.605048	0.771384	LGG	0.504783	0.584296	LGG	0.50102	0.0012793	0.79592	0.627174	0	0	0	0
centr_pathway_CNR2.xlsx	2.71796e-07	GBM	0.633273	0.941845	LGG	0.500356	0.405227	LGG	0.502724	3.67013e-07	0.949111	0.451661	0	0	0	0
centr_pathway_CNTF.xlsx	2.26889e-29	GBM	0.809285	1.67927e-06	GBM	0.652581	1.73239e-15	GBM	0.688361	6.77944e-29	3.73027e-06	1.0766e-14	1	1	0	0
centr_pathway_CNTFR.xlsx	1.20226e-32	LGG	0.83578	7.97219e-08	LGG	0.66523	1.17546e-19	LGG	0.724297	4.17717e-32	2.06257e-07	1.22055e-18	1	1	0	0
centr_pathway_CNTN1.xlsx	1.10963e-38	LGG	0.875395	8.01352e-18	LGG	0.770061	3.37994e-19	LGG	0.70515	5.16123e-38	9.30869e-17	3.29368e-18	1	1	1	1
centr_pathway_CNTN2.xlsx	3.70729e-31	LGG	0.815068	1.34701e-16	LGG	0.757609	7.84407e-15	LGG	0.677763	1.19214e-30	1.24132e-15	4.52005e-14	1	1	0	0
centr_pathway_CNTN6.xlsx	4.29176e-18	LGG	0.703585	0.165327	LGG	0.551941	0.772631	GBM	0.508426	8.8611e-18	0.192311	0.801527	0	0	0	0
centr_pathway_CNTNAP1.xlsx	2.25168e-32	LGG	0.834111	2.77093e-15	LGG	0.762669	1.14732e-08	LGG	0.630731	7.75831e-32	2.02675e-14	3.45123e-08	1	1	0	0
centr_pathway_CNTRL.xlsx	0.74668	GBM	0.530257	9.88092e-06	GBM	0.638667	9.83669e-07	GBM	0.619879	0.755683	1.98686e-05	2.43141e-06	1	0	0	0
centr_pathway_COASY.xlsx	1.28328e-07	LGG	0.644538	0.000256258	LGG	0.628983	0.0480477	LGG	0.555332	1.7477e-07	0.000413994	0.0666633	1	0	0	0
centr_pathway_COL10A1.xlsx	3.27443e-49	GBM	0.886673	6.94887e-23	GBM	0.813187	2.02839e-31	GBM	0.774439	2.88444e-48	2.87452e-21	8.97895e-30	1	1	1	1
centr_pathway_COL11A1.xlsx	1.12174e-50	GBM	0.890336	6.63428e-23	GBM	0.813029	1.03639e-32	GBM	0.780014	1.09678e-49	2.87452e-21	7.01449e-31	1	1	1	1
centr_pathway_COL11A2.xlsx	1.12174e-50	GBM	0.890336	6.63428e-23	GBM	0.813029	1.03639e-32	GBM	0.780014	1.09678e-49	2.87452e-21	7.01449e-31	1	1	1	1
centr_pathway_COL12A1.xlsx	3.27443e-49	GBM	0.886673	6.94887e-23	GBM	0.813187	2.02839e-31	GBM	0.774439	2.88444e-48	2.87452e-21	8.97895e-30	1	1	1	1
centr_pathway_COL13A1.xlsx	3.27443e-49	GBM	0.886673	6.94887e-23	GBM	0.813187	2.02839e-31	GBM	0.774439	2.88444e-48	2.87452e-21	8.97895e-30	1	1	1	1
centr_pathway_COL14A1.xlsx	3.27443e-49	GBM	0.886673	6.94887e-23	GBM	0.813187	2.02839e-31	GBM	0.774439	2.88444e-48	2.87452e-21	8.97895e-30	1	1	1	1
centr_pathway_COL15A1.xlsx	3.27443e-49	GBM	0.886673	6.94887e-23	GBM	0.813187	2.02839e-31	GBM	0.774439	2.88444e-48	2.87452e-21	8.97895e-30	1	1	1	1
centr_pathway_COL16A1.xlsx	3.27443e-49	GBM	0.886673	6.94887e-23	GBM	0.813187	2.02839e-31	GBM	0.774439	2.88444e-48	2.87452e-21	8.97895e-30	1	1	1	1
centr_pathway_COL17A1.xlsx	3.61836e-46	GBM	0.878544	2.50011e-22	GBM	0.810301	1.1604e-30	GBM	0.771356	2.70833e-45	8.2737e-21	4.43035e-29	1	1	1	1
centr_pathway_COL18A1.xlsx	3.41814e-54	GBM	0.907773	1.36957e-23	GBM	0.819116	8.1953e-34	GBM	0.786115	4.49533e-53	7.90531e-22	7.5326e-32	1	1	1	1
centr_pathway_COL19A1.xlsx	3.27443e-49	GBM	0.886673	6.94887e-23	GBM	0.813187	2.02839e-31	GBM	0.774439	2.88444e-48	2.87452e-21	8.97895e-30	1	1	1	1
centr_pathway_COL1A1.xlsx	1.12174e-50	GBM	0.890336	6.63428e-23	GBM	0.813029	1.03639e-32	GBM	0.780014	1.09678e-49	2.87452e-21	7.01449e-31	1	1	1	1
centr_pathway_COL1A2.xlsx	1.12174e-50	GBM	0.890336	6.63428e-23	GBM	0.813029	1.03639e-32	GBM	0.780014	1.09678e-49	2.87452e-21	7.01449e-31	1	1	1	1
centr_pathway_COL20A1.xlsx	3.27443e-49	GBM	0.886673	6.94887e-23	GBM	0.813187	2.02839e-31	GBM	0.774439	2.88444e-48	2.87452e-21	8.97895e-30	1	1	1	1
centr_pathway_COL21A1.xlsx	3.27443e-49	GBM	0.886673	6.94887e-23	GBM	0.813187	2.02839e-31	GBM	0.774439	2.88444e-48	2.87452e-21	8.97895e-30	1	1	1	1
centr_pathway_COL22A1.xlsx	3.27443e-49	GBM	0.886673	6.94887e-23	GBM	0.813187	2.02839e-31	GBM	0.774439	2.88444e-48	2.87452e-21	8.97895e-30	1	1	1	1
centr_pathway_COL23A1.xlsx	3.27443e-49	GBM	0.886673	6.94887e-23	GBM	0.813187	2.02839e-31	GBM	0.774439	2.88444e-48	2.87452e-21	8.97895e-30	1	1	1	1
centr_pathway_COL24A1.xlsx	3.97148e-50	GBM	0.889558	7.11532e-23	GBM	0.81295	1.49717e-32	GBM	0.77889	3.79858e-49	2.91103e-21	9.60898e-31	1	1	1	1
centr_pathway_COL25A1.xlsx	3.27443e-49	GBM	0.886673	6.94887e-23	GBM	0.813187	2.02839e-31	GBM	0.774439	2.88444e-48	2.87452e-21	8.97895e-30	1	1	1	1
centr_pathway_COL26A1.xlsx	6.16518e-38	GBM	0.860856	4.65975e-27	GBM	0.843189	1.98706e-29	GBM	0.771683	2.776e-37	1.23107e-24	6.2685e-28	1	1	1	1
centr_pathway_COL27A1.xlsx	3.97148e-50	GBM	0.889558	7.11532e-23	GBM	0.81295	1.49717e-32	GBM	0.77889	3.79858e-49	2.91103e-21	9.60898e-31	1	1	1	1
centr_pathway_COL28A1.xlsx	6.16518e-38	GBM	0.860856	4.65975e-27	GBM	0.843189	1.98706e-29	GBM	0.771683	2.776e-37	1.23107e-24	6.2685e-28	1	1	1	1
centr_pathway_COL2A1.xlsx	1.12174e-50	GBM	0.890336	6.63428e-23	GBM	0.813029	1.03639e-32	GBM	0.780014	1.09678e-49	2.87452e-21	7.01449e-31	1	1	1	1
centr_pathway_COL3A1.xlsx	1.12174e-50	GBM	0.890336	6.63428e-23	GBM	0.813029	1.03639e-32	GBM	0.780014	1.09678e-49	2.87452e-21	7.01449e-31	1	1	1	1
centr_pathway_COL4A1.xlsx	3.62774e-52	GBM	0.894413	1.47575e-22	GBM	0.811052	2.07627e-31	GBM	0.773949	3.92742e-51	5.20848e-21	8.97895e-30	1	1	1	1
centr_pathway_COL4A2.xlsx	1.22531e-51	GBM	0.893698	1.60164e-22	GBM	0.811368	3.13901e-31	GBM	0.773151	1.28554e-50	5.57281e-21	1.32033e-29	1	1	1	1
centr_pathway_COL4A3.xlsx	3.81583e-52	GBM	0.895002	1.53643e-22	GBM	0.811289	3.89088e-31	GBM	0.772897	4.12507e-51	5.37103e-21	1.59163e-29	1	1	1	1
centr_pathway_COL4A4.xlsx	3.62774e-52	GBM	0.894413	1.47575e-22	GBM	0.811052	2.07627e-31	GBM	0.773949	3.92742e-51	5.20848e-21	8.97895e-30	1	1	1	1
centr_pathway_COL4A5.xlsx	3.62774e-52	GBM	0.894413	1.47575e-22	GBM	0.811052	2.07627e-31	GBM	0.773949	3.92742e-51	5.20848e-21	8.97895e-30	1	1	1	1
centr_pathway_COL4A6.xlsx	3.62774e-52	GBM	0.894413	1.47575e-22	GBM	0.811052	2.07627e-31	GBM	0.773949	3.92742e-51	5.20848e-21	8.97895e-30	1	1	1	1
centr_pathway_COL5A1.xlsx	2.05473e-49	GBM	0.886685	1.6715e-22	GBM	0.809985	9.23393e-32	GBM	0.775726	1.86953e-48	5.78882e-21	4.95209e-30	1	1	1	1
centr_pathway_COL5A2.xlsx	3.38535e-47	GBM	0.879121	4.13822e-22	GBM	0.807297	6.77212e-31	GBM	0.772027	2.68456e-46	1.26803e-20	2.68183e-29	1	1	1	1
centr_pathway_COL5A3.xlsx	7.51333e-49	GBM	0.88582	1.81302e-22	GBM	0.809866	1.37956e-31	GBM	0.774629	6.44369e-48	6.24988e-21	6.98693e-30	1	1	1	1
centr_pathway_COL6A1.xlsx	8.20963e-48	GBM	0.880626	2.05023e-22	GBM	0.808522	1.69388e-31	GBM	0.775128	6.82157e-47	6.97077e-21	8.29668e-30	1	1	1	1
centr_pathway_COL6A2.xlsx	5.03098e-50	GBM	0.887927	8.43721e-23	GBM	0.811843	2.34373e-32	GBM	0.778545	4.74543e-49	3.2551e-21	1.40157e-30	1	1	1	1
centr_pathway_COL6A3.xlsx	5.03098e-50	GBM	0.887927	8.43721e-23	GBM	0.811843	2.34373e-32	GBM	0.778545	4.74543e-49	3.2551e-21	1.40157e-30	1	1	1	1
centr_pathway_COL6A5.xlsx	2.51857e-43	GBM	0.877415	1.30805e-25	GBM	0.833188	7.36352e-32	GBM	0.781682	1.51846e-42	1.58433e-23	4.03099e-30	1	1	1	1
centr_pathway_COL6A6.xlsx	2.51857e-43	GBM	0.877415	1.30805e-25	GBM	0.833188	7.36352e-32	GBM	0.781682	1.51846e-42	1.58433e-23	4.03099e-30	1	1	1	1
centr_pathway_COL7A1.xlsx	1.29763e-47	GBM	0.886271	5.14065e-23	GBM	0.814768	9.50095e-32	GBM	0.776787	1.05822e-46	2.50381e-21	4.98131e-30	1	1	1	1
centr_pathway_COL8A1.xlsx	3.27443e-49	GBM	0.886673	6.94887e-23	GBM	0.813187	2.02839e-31	GBM	0.774439	2.88444e-48	2.87452e-21	8.97895e-30	1	1	1	1
centr_pathway_COL8A2.xlsx	3.27443e-49	GBM	0.886673	6.94887e-23	GBM	0.813187	2.02839e-31	GBM	0.774439	2.88444e-48	2.87452e-21	8.97895e-30	1	1	1	1
centr_pathway_COL9A1.xlsx	5.10942e-50	GBM	0.890511	5.2569e-23	GBM	0.814056	9.37871e-32	GBM	0.775445	4.80093e-49	2.50381e-21	4.95209e-30	1	1	1	1
centr_pathway_COL9A2.xlsx	5.10942e-50	GBM	0.890511	5.2569e-23	GBM	0.814056	9.37871e-32	GBM	0.775445	4.80093e-49	2.50381e-21	4.95209e-30	1	1	1	1
centr_pathway_COL9A3.xlsx	5.10942e-50	GBM	0.890511	5.2569e-23	GBM	0.814056	9.37871e-32	GBM	0.775445	4.80093e-49	2.50381e-21	4.95209e-30	1	1	1	1
centr_pathway_COLGALT1.xlsx	3.44822e-34	GBM	0.843444	2.27087e-26	GBM	0.840106	7.58093e-28	GBM	0.766533	1.3142e-33	4.22722e-24	1.98732e-26	1	1	1	1
centr_pathway_COLGALT2.xlsx	3.25847e-32	GBM	0.833672	6.43213e-26	GBM	0.838485	1.16943e-26	GBM	0.759562	1.11297e-31	9.3909e-24	2.5912e-25	1	1	1	1
centr_pathway_COMP.xlsx	2.83488e-57	GBM	0.918021	2.91058e-18	GBM	0.785161	1.80031e-34	GBM	0.793585	5.09052e-56	3.72374e-17	1.88779e-32	1	1	1	1
centr_pathway_COMT.xlsx	0.00130312	GBM	0.599905	0.00284547	LGG	0.61661	2.7321e-07	LGG	0.61696	0.00154366	0.00413896	7.18746e-07	0	1	0	0
centr_pathway_COPA.xlsx	4.61351e-18	GBM	0.740604	1.07618e-10	GBM	0.707487	3.80833e-20	GBM	0.716754	9.51752e-18	3.73403e-10	4.09726e-19	1	1	1	1
centr_pathway_COPB1.xlsx	6.36055e-38	GBM	0.867567	9.84621e-17	GBM	0.776702	1.59823e-17	GBM	0.706102	2.85365e-37	9.222e-16	1.22039e-16	1	1	1	1
centr_pathway_COPB2.xlsx	6.36055e-38	GBM	0.867567	9.84621e-17	GBM	0.776702	1.59823e-17	GBM	0.706102	2.85365e-37	9.222e-16	1.22039e-16	1	1	1	1
centr_pathway_COPE.xlsx	6.36055e-38	GBM	0.867567	9.84621e-17	GBM	0.776702	1.59823e-17	GBM	0.706102	2.85365e-37	9.222e-16	1.22039e-16	1	1	1	1
centr_pathway_COPG1.xlsx	6.36055e-38	GBM	0.867567	9.84621e-17	GBM	0.776702	1.59823e-17	GBM	0.706102	2.85365e-37	9.222e-16	1.22039e-16	1	1	1	1
centr_pathway_COPRS.xlsx	2.8808e-54	GBM	0.951954	1.87844e-14	GBM	0.755238	5.57998e-05	GBM	0.638291	3.99992e-53	1.17023e-13	0.000117353	1	1	0	0
centr_pathway_COPS5.xlsx	1.05258e-05	GBM	0.619311	9.79054e-08	GBM	0.675587	6.53158e-09	GBM	0.626098	1.351e-05	2.51467e-07	2.00858e-08	1	1	0	0
centr_pathway_COPZ1.xlsx	6.36055e-38	GBM	0.867567	9.84621e-17	GBM	0.776702	1.59823e-17	GBM	0.706102	2.85365e-37	9.222e-16	1.22039e-16	1	1	1	1
centr_pathway_COQ2.xlsx	1.8546e-48	GBM	0.877452	6.6476e-10	GBM	0.70808	3.61354e-10	GBM	0.656595	1.57609e-47	2.10272e-09	1.25421e-09	1	1	0	0
centr_pathway_COQ3.xlsx	0.00141947	LGG	0.596668	3.05521e-05	LGG	0.647324	5.11464e-08	LGG	0.632399	0.00168042	5.42033e-05	1.44128e-07	1	1	0	0
centr_pathway_COQ5.xlsx	7.25409e-12	GBM	0.686073	0.0399972	LGG	0.580599	0.00378389	LGG	0.576301	1.21389e-11	0.0504607	0.00635772	0	0	0	0
centr_pathway_COQ6.xlsx	0.000949138	GBM	0.587285	5.49255e-05	LGG	0.633607	8.07075e-05	LGG	0.597732	0.00112971	9.4758e-05	0.000167279	0	1	0	0
centr_pathway_COQ7.xlsx	1.01934e-10	LGG	0.699997	0.664075	LGG	0.525615	7.95482e-05	LGG	0.596943	1.63823e-10	0.696045	0.00016506	1	0	0	0
centr_pathway_COX10.xlsx	0.149668	GBM	0.527435	0.0512095	LGG	0.563483	0.0221724	LGG	0.557716	0.160773	0.0637636	0.0327657	0	0	0	0
centr_pathway_COX11.xlsx	8.18782e-25	GBM	0.791635	0.177635	GBM	0.545419	0.232252	GBM	0.5311	2.09606e-24	0.205351	0.274681	1	0	0	0
centr_pathway_COX14.xlsx	1.32963e-23	GBM	0.796402	0.0137453	GBM	0.584275	0.785436	GBM	0.551452	3.28558e-23	0.0185111	0.813631	1	0	0	0
centr_pathway_COX15.xlsx	8.33051e-37	LGG	0.82193	7.12774e-12	LGG	0.730018	1.33756e-30	LGG	0.761837	3.56613e-36	2.87659e-11	5.02935e-29	1	1	1	1
centr_pathway_COX16.xlsx	2.59768e-28	GBM	0.824715	0.00292492	GBM	0.589809	0.899808	GBM	0.539585	7.49505e-28	0.0042454	0.916802	1	0	0	0
centr_pathway_COX18.xlsx	8.22077e-25	GBM	0.795549	0.0649455	GBM	0.55787	0.00441164	GBM	0.552567	2.10377e-24	0.0798389	0.00733468	1	0	0	0
centr_pathway_COX20.xlsx	0.0492006	GBM	0.537094	0.113291	GBM	0.537552	0.609203	GBM	0.537572	0.0541518	0.134884	0.648819	1	0	0	0
centr_pathway_COX4I1.xlsx	8.84347e-13	GBM	0.697188	0.0700151	GBM	0.564432	0.213604	LGG	0.508744	1.52249e-12	0.0857031	0.25416	0	0	0	0
centr_pathway_COX5A.xlsx	9.28442e-30	GBM	0.814805	0.30657	GBM	0.536129	0.983281	GBM	0.524418	2.80561e-29	0.341623	0.988592	1	0	0	0
centr_pathway_COX5B.xlsx	1.17319e-28	GBM	0.821416	0.00829193	GBM	0.584117	0.892498	GBM	0.524328	3.41401e-28	0.0114188	0.910225	1	0	0	0
centr_pathway_COX6A1.xlsx	2.93639e-29	GBM	0.823812	0.0159475	GBM	0.58139	0.552898	GBM	0.540419	8.73551e-29	0.0213379	0.599436	1	0	0	0
centr_pathway_COX6B1.xlsx	3.80122e-35	GBM	0.851987	9.33856e-08	GBM	0.68033	0.195141	GBM	0.586817	1.51717e-34	2.40476e-07	0.233535	1	0	0	0
centr_pathway_COX6C.xlsx	5.48256e-14	GBM	0.707148	0.568091	GBM	0.520634	0.82475	LGG	0.532323	9.80716e-14	0.60351	0.850924	0	0	0	0
centr_pathway_COX7A2L.xlsx	6.56498e-22	GBM	0.780007	0.000480477	GBM	0.618152	0.134554	GBM	0.545487	1.52205e-21	0.000758937	0.16641	1	0	0	0
centr_pathway_COX7B.xlsx	9.26209e-33	GBM	0.843306	4.08003e-06	GBM	0.646375	0.00352245	GBM	0.597813	3.23761e-32	8.72986e-06	0.00595473	1	1	0	0
centr_pathway_COX7C.xlsx	1.06763e-15	GBM	0.726391	0.275986	GBM	0.535853	0.790241	LGG	0.52818	2.00635e-15	0.309346	0.818381	0	0	0	0
centr_pathway_COX8A.xlsx	4.10675e-28	GBM	0.815232	0.003113	GBM	0.596569	0.881314	GBM	0.526422	1.17134e-27	0.00451489	0.901908	1	0	0	0
centr_pathway_CP.xlsx	3.56159e-26	GBM	0.755921	2.83884e-08	GBM	0.677287	4.35894e-16	GBM	0.69108	9.61513e-26	7.65316e-08	2.91313e-15	1	1	0	0
centr_pathway_CPA3.xlsx	0.00220402	GBM	0.58721	0.00991405	LGG	0.586884	0.0154236	LGG	0.569003	0.00258381	0.0135499	0.0236956	0	1	0	0
centr_pathway_CPB1.xlsx	7.30303e-11	LGG	0.673754	1.17445e-07	LGG	0.681121	0.000365376	LGG	0.587551	1.17877e-10	2.99895e-07	0.000705635	1	1	0	0
centr_pathway_CPB2.xlsx	3.55328e-10	LGG	0.680027	0.000101437	LGG	0.6376	0.0154236	LGG	0.569003	5.31604e-10	0.000170381	0.0236956	1	1	0	0
centr_pathway_CPD.xlsx	2.03022e-06	LGG	0.617316	0.00116353	LGG	0.606925	0.556576	LGG	0.524781	2.66721e-06	0.00176377	0.601845	1	0	0	0
centr_pathway_CPE.xlsx	9.05811e-22	LGG	0.764627	3.51004e-14	LGG	0.74919	2.73658e-07	LGG	0.613814	2.09163e-21	2.0677e-13	7.1967e-07	1	1	0	0
centr_pathway_CPEB1.xlsx	1.55131e-75	GBM	0.908488	2.36089e-19	GBM	0.783145	2.58223e-26	GBM	0.744903	2.03303e-73	3.70869e-18	5.4307e-25	1	1	1	1
centr_pathway_CPEB2.xlsx	1.17524e-84	GBM	0.918837	1.19467e-20	GBM	0.791406	4.24497e-30	GBM	0.760931	3.81697e-82	2.47098e-19	1.50494e-28	1	1	1	1
centr_pathway_CPEB3.xlsx	1.3128e-59	GBM	0.877139	4.83395e-16	GBM	0.763973	5.62647e-22	GBM	0.724741	3.14316e-58	4.07629e-15	7.33609e-21	1	1	1	1
centr_pathway_CPEB4.xlsx	4.60027e-74	GBM	0.90145	1.78598e-16	GBM	0.765357	1.63507e-24	GBM	0.736472	4.58187e-72	1.59454e-15	2.81134e-23	1	1	1	1
centr_pathway_CPLX1.xlsx	6.75454e-30	LGG	0.777736	5.94239e-15	LGG	0.75164	1.67674e-13	LGG	0.696148	2.05024e-29	4.00788e-14	8.17505e-13	1	1	0	0
centr_pathway_CPN1.xlsx	0.00398648	LGG	0.564974	#NUM!	GBM	0.5	#NUM!	GBM	0.5	0.00462192	#NUM!	#NUM!	0	0	0	0
centr_pathway_CPOX.xlsx	1.99012e-15	GBM	0.709142	0.066716	GBM	0.567041	0.966332	GBM	0.504111	3.70635e-15	0.0818398	0.973718	1	0	0	0
centr_pathway_CPS1.xlsx	4.36745e-51	LGG	0.853793	5.46814e-21	LGG	0.799233	1.1628e-08	LGG	0.635816	4.37823e-50	1.2154e-19	3.4964e-08	1	1	0	0
centr_pathway_CPSF1.xlsx	3.16484e-11	GBM	0.686299	4.16916e-14	GBM	0.743735	0.0368719	GBM	0.569991	5.1675e-11	2.40275e-13	0.0522083	1	0	0	0
centr_pathway_CPSF2.xlsx	3.16484e-11	GBM	0.686299	4.16916e-14	GBM	0.743735	0.0368719	GBM	0.569991	5.1675e-11	2.40275e-13	0.0522083	1	0	0	0
centr_pathway_CPSF3.xlsx	3.16484e-11	GBM	0.686299	4.16916e-14	GBM	0.743735	0.0368719	GBM	0.569991	5.1675e-11	2.40275e-13	0.0522083	1	0	0	0
centr_pathway_CPSF4.xlsx	9.5213e-25	GBM	0.786818	6.76772e-12	GBM	0.727251	0.0147608	GBM	0.575213	2.42993e-24	2.74319e-11	0.0227289	1	1	0	0
centr_pathway_CPSF7.xlsx	4.52967e-08	GBM	0.650835	1.09961e-12	GBM	0.724919	0.318585	GBM	0.549122	6.28001e-08	5.06038e-12	0.363448	1	0	0	0
centr_pathway_CPT1A.xlsx	5.45442e-36	LGG	0.831928	2.68939e-10	LGG	0.710096	8.96381e-08	LGG	0.627993	2.26107e-35	8.91595e-10	2.46712e-07	1	1	0	0
centr_pathway_CPT1B.xlsx	5.45442e-36	LGG	0.831928	2.68939e-10	LGG	0.710096	8.96381e-08	LGG	0.627993	2.26107e-35	8.91595e-10	2.46712e-07	1	1	0	0
centr_pathway_CPT1C.xlsx	5.45442e-36	LGG	0.831928	2.68939e-10	LGG	0.710096	8.96381e-08	LGG	0.627993	2.26107e-35	8.91595e-10	2.46712e-07	1	1	0	0
centr_pathway_CPT2.xlsx	7.12613e-19	LGG	0.731284	0.164427	GBM	0.565143	0.000737919	LGG	0.569683	1.5097e-18	0.19133	0.00137242	0	0	0	0
centr_pathway_CR1.xlsx	2.73484e-43	GBM	0.887965	4.20087e-14	GBM	0.750613	8.33525e-15	GBM	0.678706	1.64355e-42	2.41728e-13	4.74634e-14	1	1	0	0
centr_pathway_CRABP1.xlsx	0.000893567	GBM	0.587059	0.703853	GBM	0.509803	0.546348	GBM	0.51043	0.00106424	0.732684	0.592507	1	0	0	0
centr_pathway_CRABP2.xlsx	1.79222e-07	GBM	0.649794	0.015384	GBM	0.58218	0.682424	GBM	0.503613	2.43239e-07	0.0206209	0.718417	1	0	0	0
centr_pathway_CRADD.xlsx	2.88166e-39	GBM	0.862161	6.11803e-14	GBM	0.74836	2.13171e-18	GBM	0.720054	1.38698e-38	3.44852e-13	1.90982e-17	1	1	1	1
centr_pathway_CRAT.xlsx	0.000765205	LGG	0.583496	0.0254213	LGG	0.562969	0.00204012	LGG	0.568486	0.000914573	0.0333134	0.00359582	1	1	0	0
centr_pathway_CRB3.xlsx	1.23282e-11	LGG	0.684831	6.004e-14	LGG	0.732588	0.00446393	LGG	0.575313	2.04831e-11	3.3868e-13	0.00741499	1	1	0	0
centr_pathway_CRCP.xlsx	4.14604e-19	LGG	0.74645	0.123494	GBM	0.536525	3.67907e-07	LGG	0.595139	8.86404e-19	0.146587	9.57047e-07	0	0	0	0
centr_pathway_CREB1.xlsx	7.08052e-49	LGG	0.892192	6.09131e-10	LGG	0.701518	0.0214022	LGG	0.563763	6.09349e-48	1.93415e-09	0.0316715	1	1	0	0
centr_pathway_CREB3.xlsx	9.22567e-53	LGG	0.889395	2.83103e-18	LGG	0.77603	1.68342e-09	LGG	0.655498	1.06351e-51	3.63446e-17	5.5163e-09	1	1	0	0
centr_pathway_CREB3L1.xlsx	9.77384e-44	LGG	0.833659	1.82874e-15	LGG	0.750059	1.86459e-07	LGG	0.622445	6.10456e-43	1.4038e-14	4.9845e-07	1	1	0	0
centr_pathway_CREB3L2.xlsx	2.78841e-54	LGG	0.874793	1.88602e-16	LGG	0.761602	2.00178e-06	LGG	0.612772	3.87885e-53	1.67763e-15	4.80441e-06	1	1	0	0
centr_pathway_CREB3L3.xlsx	1.81108e-56	LGG	0.875119	1.03363e-17	LGG	0.773381	9.15521e-08	LGG	0.629588	2.96684e-55	1.16141e-16	2.51794e-07	1	1	0	0
centr_pathway_CREB3L4.xlsx	1.31542e-53	LGG	0.893196	1.18735e-19	LGG	0.786979	5.19076e-10	LGG	0.659822	1.62955e-52	2.00023e-18	1.78253e-09	1	1	0	0
centr_pathway_CREB5.xlsx	4.30405e-53	LGG	0.871569	1.9584e-16	LGG	0.763341	5.47697e-05	LGG	0.595465	5.14421e-52	1.73598e-15	0.000115252	1	1	0	0
centr_pathway_CREBBP.xlsx	3.41923e-06	GBM	0.634227	7.38144e-06	GBM	0.661436	2.37896e-05	GBM	0.625944	4.45519e-06	1.51955e-05	5.18481e-05	1	1	0	0
centr_pathway_CREM.xlsx	2.05916e-20	GBM	0.705354	0.150423	GBM	0.555815	0.039817	GBM	0.561252	4.56844e-20	0.175942	0.0561053	1	0	0	0
centr_pathway_CRH.xlsx	0.656198	LGG	0.501969	0.26688	LGG	0.525417	0.0614392	LGG	0.529984	0.671111	0.300362	0.0801077	1	0	0	0
centr_pathway_CRHR1.xlsx	3.46042e-08	LGG	0.64282	1.39017e-05	LGG	0.640723	5.71151e-05	LGG	0.596843	4.85251e-08	2.58007e-05	0.000120085	1	1	0	0
centr_pathway_CRHR2.xlsx	0.00828016	GBM	0.566611	0.535259	GBM	0.521148	0.236192	LGG	0.506024	0.00944029	0.572635	0.278854	0	0	0	0
centr_pathway_CRK.xlsx	0.000218661	LGG	0.598475	0.000111722	LGG	0.629141	1.82019e-09	LGG	0.642471	0.000267113	0.000186478	5.92019e-09	1	1	0	0
centr_pathway_CRKL.xlsx	2.17861e-06	GBM	0.629773	0.00671935	GBM	0.589177	1.18037e-06	GBM	0.613615	2.85864e-06	0.00934659	2.89551e-06	1	1	0	0
centr_pathway_CRLF2.xlsx	1.91625e-33	LGG	0.844448	5.9249e-09	LGG	0.686339	2.49342e-22	LGG	0.739953	6.86872e-33	1.70072e-08	3.39369e-21	1	1	0	0
centr_pathway_CRLS1.xlsx	1.67415e-30	LGG	0.795424	1.09897e-08	LGG	0.690885	0.805605	GBM	0.507003	5.22823e-30	3.06593e-08	0.832324	0	0	0	0
centr_pathway_CRMP1.xlsx	0.00160429	LGG	0.574427	0.332701	GBM	0.525615	0.909757	GBM	0.506115	0.00189202	0.36859	0.924913	0	0	0	0
centr_pathway_CROT.xlsx	6.59601e-32	GBM	0.814052	7.57892e-07	GBM	0.675152	1.76046e-14	GBM	0.679313	2.21747e-31	1.73639e-06	9.71581e-14	1	1	0	0
centr_pathway_CRP.xlsx	2.72013e-27	GBM	0.793003	1.82245e-11	GBM	0.724168	1.15546e-14	GBM	0.693256	7.59318e-27	6.94114e-11	6.49729e-14	1	1	0	0
centr_pathway_CRTAP.xlsx	1.11744e-35	GBM	0.850306	1.37038e-26	GBM	0.841213	3.25842e-29	GBM	0.772952	4.57887e-35	2.86798e-24	9.82143e-28	1	1	1	1
centr_pathway_CRTC2.xlsx	7.972e-12	LGG	0.66328	0.24266	GBM	0.534746	0.0502097	GBM	0.551524	1.33015e-11	0.274805	0.0694171	0	0	0	0
centr_pathway_CRY1.xlsx	4.51859e-39	GBM	0.849704	0.00153605	GBM	0.616333	1.77976e-06	GBM	0.612255	2.15956e-38	0.00228887	4.29787e-06	1	1	0	0
centr_pathway_CRY2.xlsx	1.6915e-16	LGG	0.730895	2.00257e-08	LGG	0.695944	0.00011785	LGG	0.599382	3.25825e-16	5.45995e-08	0.000240844	1	1	0	0
centr_pathway_CRYL1.xlsx	0.221661	GBM	0.506423	7.07679e-06	LGG	0.638351	1.28352e-05	LGG	0.597469	0.235702	1.4629e-05	2.87393e-05	0	0	0	0
centr_pathway_CRYM.xlsx	3.12319e-06	LGG	0.615397	1.12731e-05	LGG	0.648925	1.41384e-05	LGG	0.614204	4.07515e-06	2.11115e-05	3.15528e-05	1	1	0	0
centr_pathway_CS.xlsx	1.67766e-10	LGG	0.670693	3.59551e-09	LGG	0.69211	3.04967e-06	LGG	0.609445	2.66471e-10	1.05861e-08	7.19646e-06	1	1	0	0
centr_pathway_CSAD.xlsx	1.77805e-18	LGG	0.74221	0.000205691	LGG	0.620444	2.62766e-09	LGG	0.634665	3.72777e-18	0.000334479	8.42866e-09	1	1	0	0
centr_pathway_CSF1.xlsx	6.98216e-29	GBM	0.794521	7.83934e-05	GBM	0.625899	2.22177e-12	GBM	0.671752	2.04536e-28	0.000133117	9.79923e-12	1	1	0	0
centr_pathway_CSF1R.xlsx	1.56089e-29	GBM	0.816662	2.16386e-05	GBM	0.643411	3.93025e-11	GBM	0.660955	4.68457e-29	3.9145e-05	1.51846e-10	1	1	0	0
centr_pathway_CSF2.xlsx	3.58019e-29	GBM	0.798547	1.4244e-05	GBM	0.638944	2.20725e-14	GBM	0.688669	1.06085e-28	2.64162e-05	1.20831e-13	1	1	0	0
centr_pathway_CSF2RA.xlsx	0.00705326	LGG	0.581401	0.0783952	LGG	0.560202	0.003422	LGG	0.558931	0.00806735	0.0953964	0.0057915	1	0	0	0
centr_pathway_CSF2RB.xlsx	1.9713e-30	GBM	0.823837	0.000320356	GBM	0.607914	3.88144e-11	GBM	0.660756	6.1331e-30	0.000513756	1.50194e-10	1	1	0	0
centr_pathway_CSF3.xlsx	6.75025e-30	GBM	0.802812	2.99562e-05	GBM	0.633528	8.29528e-14	GBM	0.684281	2.05024e-29	5.31967e-05	4.21183e-13	1	1	0	0
centr_pathway_CSF3R.xlsx	0.0342938	LGG	0.560189	0.58904	GBM	0.508657	0.67293	GBM	0.511645	0.0380081	0.624518	0.709827	0	0	0	0
centr_pathway_CSGALNACT1.xlsx	4.46826e-05	GBM	0.630626	0.267555	GBM	0.544707	0.152957	LGG	0.512796	5.61822e-05	0.30103	0.187143	0	0	0	0
centr_pathway_CSGALNACT2.xlsx	4.02815e-07	GBM	0.648176	0.0129202	GBM	0.580639	0.757168	LGG	0.510838	5.41095e-07	0.0175139	0.787526	0	0	0	0
centr_pathway_CSH1.xlsx	2.78422e-31	GBM	0.81897	1.05948e-06	GBM	0.654992	1.47089e-15	GBM	0.689032	9.01914e-31	2.39346e-06	9.28034e-15	1	1	0	0
centr_pathway_CSH2.xlsx	2.13679e-31	GBM	0.819848	1.05948e-06	GBM	0.654992	1.47089e-15	GBM	0.689032	6.97022e-31	2.39346e-06	9.28034e-15	1	1	0	0
centr_pathway_CSK.xlsx	8.47495e-48	GBM	0.862148	2.12984e-20	GBM	0.802277	7.74509e-31	GBM	0.762046	7.0264e-47	4.11917e-19	3.01896e-29	1	1	1	1
centr_pathway_CSNK1A1.xlsx	1.63025e-11	GBM	0.689636	0.000566693	GBM	0.614555	0.949011	LGG	0.524781	2.69782e-11	0.000888149	0.959306	0	0	0	0
centr_pathway_CSNK1A1L.xlsx	3.18656e-20	LGG	0.753588	0.00853269	LGG	0.5889	2.11386e-08	LGG	0.643948	7.04458e-20	0.0117309	6.20082e-08	1	1	0	0
centr_pathway_CSNK1D.xlsx	7.19702e-19	LGG	0.763172	0.346236	LGG	0.55455	0.157445	LGG	0.530311	1.52429e-18	0.382276	0.19216	1	0	0	0
centr_pathway_CSNK1E.xlsx	1.53402e-11	LGG	0.69508	0.124545	GBM	0.520002	0.188848	GBM	0.53129	2.54196e-11	0.147247	0.226551	0	0	0	0
centr_pathway_CSNK1G1.xlsx	0.104894	LGG	0.522969	0.769355	LGG	0.51091	0.779558	GBM	0.505571	0.11374	0.794097	0.807768	0	0	0	0
centr_pathway_CSNK1G2.xlsx	0.0214663	LGG	0.535652	0.0373665	GBM	0.59147	0.0640063	GBM	0.548252	0.0240122	0.0473665	0.0831781	0	0	0	0
centr_pathway_CSNK1G3.xlsx	3.2222e-35	LGG	0.810979	0.138963	LGG	0.570164	0.158028	LGG	0.545895	1.28922e-34	0.163282	0.19284	1	0	0	0
centr_pathway_CSNK2A1.xlsx	5.24984e-32	LGG	0.81838	2.11606e-07	LGG	0.682188	2.74843e-05	LGG	0.600234	1.7753e-31	5.22247e-07	5.94655e-05	1	1	0	0
centr_pathway_CSNK2A2.xlsx	6.41208e-59	LGG	0.916541	2.2025e-11	LGG	0.732548	1.04129e-15	LGG	0.697689	1.38836e-57	8.27854e-11	6.70045e-15	1	1	0	0
centr_pathway_CSNK2A3.xlsx	1.57762e-12	GBM	0.71687	0.102797	LGG	0.553206	0.0218655	LGG	0.559149	2.69614e-12	0.123197	0.0323249	0	0	0	0
centr_pathway_CSNK2B.xlsx	2.7536e-09	LGG	0.657936	0.371804	GBM	0.521859	0.504718	LGG	0.511871	4.00028e-09	0.408085	0.551376	0	0	0	0
centr_pathway_CSPG4.xlsx	3.97584e-21	GBM	0.781424	1.88436e-10	GBM	0.713614	9.54173e-12	GBM	0.663521	9.00804e-21	6.36036e-10	3.95756e-11	1	1	0	0
centr_pathway_CSPG5.xlsx	1.10244e-05	GBM	0.627239	0.020898	GBM	0.590481	0.0136587	GBM	0.564951	1.41401e-05	0.027585	0.0211412	1	1	0	0
centr_pathway_CSTF1.xlsx	5.40353e-09	GBM	0.661385	6.51323e-13	GBM	0.728556	0.292929	GBM	0.550165	7.77284e-09	3.16357e-12	0.339486	1	0	0	0
centr_pathway_CSTF2.xlsx	5.40353e-09	GBM	0.661385	6.51323e-13	GBM	0.728556	0.292929	GBM	0.550165	7.77284e-09	3.16357e-12	0.339486	1	0	0	0
centr_pathway_CSTF3.xlsx	5.40353e-09	GBM	0.661385	6.51323e-13	GBM	0.728556	0.292929	GBM	0.550165	7.77284e-09	3.16357e-12	0.339486	1	0	0	0
centr_pathway_CTBP1.xlsx	1.63015e-35	LGG	0.844021	0.781131	LGG	0.53858	0.0062464	LGG	0.584695	6.62525e-35	0.804245	0.0100965	1	0	0	0
centr_pathway_CTBP2.xlsx	5.95351e-40	LGG	0.834023	3.57235e-09	LGG	0.696972	9.83893e-12	LGG	0.667174	3.0151e-39	1.05304e-08	4.07835e-11	1	1	0	0
centr_pathway_CTCF.xlsx	7.97973e-11	LGG	0.679412	0.256739	LGG	0.51257	0.759342	GBM	0.50568	1.28661e-10	0.289648	0.789236	0	0	0	0
centr_pathway_CTDNEP1.xlsx	0.0920781	LGG	0.55497	0.0171479	LGG	0.608981	0.41496	LGG	0.528443	0.100134	0.0228536	0.461032	1	0	0	0
centr_pathway_CTDP1.xlsx	0.00233425	GBM	0.578253	6.47294e-05	GBM	0.622618	0.0319146	LGG	0.533375	0.00272963	0.000110545	0.0458253	0	1	0	0
centr_pathway_CTDSP1.xlsx	7.02108e-07	LGG	0.617756	0.548309	GBM	0.513361	0.083971	GBM	0.533021	9.35392e-07	0.584413	0.107159	0	0	0	0
centr_pathway_CTDSP2.xlsx	0.00597167	LGG	0.566436	0.93941	LGG	0.502886	0.00905171	GBM	0.54972	0.00687023	0.946785	0.0143383	0	0	0	0
centr_pathway_CTDSPL.xlsx	3.73819e-12	LGG	0.678747	0.348697	LGG	0.538975	0.415101	GBM	0.512152	6.30488e-12	0.384709	0.46112	0	0	0	0
centr_pathway_CTF1.xlsx	1.13482e-32	GBM	0.824427	6.89428e-08	GBM	0.673452	1.23635e-17	GBM	0.702304	3.95203e-32	1.79681e-07	9.57816e-17	1	1	0	0
centr_pathway_CTGF.xlsx	1.13924e-09	GBM	0.661285	0.000314892	GBM	0.612064	1.37347e-08	GBM	0.646468	1.68018e-09	0.000505212	4.10167e-08	1	1	0	0
centr_pathway_CTH.xlsx	0.000218709	LGG	0.609163	4.3171e-10	LGG	0.698197	3.32355e-15	LGG	0.679531	0.000267129	1.39096e-09	2.01006e-14	1	1	0	0
centr_pathway_CTHRC1.xlsx	1.2819e-53	GBM	0.909454	6.84938e-19	GBM	0.78939	2.35321e-32	GBM	0.796405	1.59066e-52	9.82668e-18	1.40157e-30	1	1	1	1
centr_pathway_CTLA4.xlsx	3.77443e-19	GBM	0.729402	0.0123609	LGG	0.571429	0.222817	LGG	0.533547	8.08807e-19	0.0167588	0.264489	0	0	0	0
centr_pathway_CTNNA1.xlsx	2.68197e-19	LGG	0.737455	0.0146196	LGG	0.572654	0.71195	LGG	0.508227	5.76196e-19	0.01964	0.74602	1	0	0	0
centr_pathway_CTNNA2.xlsx	0.521124	GBM	0.524424	0.331682	GBM	0.535102	0.119676	GBM	0.528425	0.537234	0.367735	0.149495	1	0	0	0
centr_pathway_CTNNA3.xlsx	0.000480551	LGG	0.57809	0.844058	GBM	0.524943	0.0201158	GBM	0.541017	0.000578893	0.861175	0.0299885	0	0	0	0
centr_pathway_CTNNB1.xlsx	0.0727404	GBM	0.563174	0.770691	GBM	0.527354	0.180872	GBM	0.52139	0.0794286	0.795366	0.217945	1	0	0	0
centr_pathway_CTNNBIP1.xlsx	5.85317e-17	GBM	0.728486	0.0133151	GBM	0.588189	9.49405e-05	GBM	0.579773	1.1672e-16	0.0179665	0.000195582	1	1	0	0
centr_pathway_CTNNBL1.xlsx	4.52967e-08	GBM	0.650835	1.09961e-12	GBM	0.724919	0.318585	GBM	0.549122	6.28001e-08	5.06038e-12	0.363448	1	0	0	0
centr_pathway_CTNND1.xlsx	2.54055e-14	LGG	0.702193	0.683586	LGG	0.502293	0.230913	GBM	0.52595	4.59958e-14	0.713682	0.273358	0	0	0	0
centr_pathway_CTNS.xlsx	7.31389e-12	GBM	0.677279	0.00548811	GBM	0.581864	0.0013506	GBM	0.567235	1.22362e-11	0.00771319	0.00242821	1	1	0	0
centr_pathway_CTPS1.xlsx	6.95864e-11	GBM	0.657283	5.72288e-05	GBM	0.632856	0.849793	GBM	0.523067	1.12464e-10	9.86173e-05	0.873372	1	0	0	0
centr_pathway_CTPS2.xlsx	8.83205e-22	GBM	0.785162	1.76107e-10	GBM	0.707803	0.467709	LGG	0.511355	2.04132e-21	5.95771e-10	0.51457	0	0	0	0
centr_pathway_CTRC.xlsx	8.45029e-76	GBM	0.907446	1.32366e-23	GBM	0.821093	1.03627e-31	GBM	0.777385	1.1477e-73	7.7e-22	5.35764e-30	1	1	1	1
centr_pathway_CTSA.xlsx	9.95352e-46	GBM	0.815357	1.3479e-10	GBM	0.705352	1.44963e-13	GBM	0.672043	7.28235e-45	4.61658e-10	7.13316e-13	1	1	0	0
centr_pathway_CTSB.xlsx	2.82753e-44	GBM	0.815583	7.63241e-12	GBM	0.718713	8.63507e-15	GBM	0.679884	1.85603e-43	3.06531e-11	4.91124e-14	1	1	0	0
centr_pathway_CTSC.xlsx	4.86937e-46	GBM	0.818042	9.43736e-11	GBM	0.707684	2.60549e-14	GBM	0.677092	3.61932e-45	3.29909e-10	1.40768e-13	1	1	0	0
centr_pathway_CTSD.xlsx	6.06394e-37	LGG	0.788298	2.5125e-07	LGG	0.671832	4.47962e-10	LGG	0.645054	2.61081e-36	6.15398e-07	1.5433e-09	1	1	0	0
centr_pathway_CTSE.xlsx	8.17815e-44	GBM	0.808746	6.40081e-10	GBM	0.698118	1.61485e-12	GBM	0.66392	5.138e-43	2.02983e-09	7.17337e-12	1	1	0	0
centr_pathway_CTSF.xlsx	4.52017e-42	GBM	0.804343	2.9435e-09	GBM	0.691794	5.90053e-11	GBM	0.651989	2.50301e-41	8.74243e-09	2.23105e-10	1	1	0	0
centr_pathway_CTSG.xlsx	9.01814e-54	GBM	0.905941	8.18213e-25	GBM	0.817575	1.46361e-37	GBM	0.796686	1.1284e-52	7.11173e-23	3.6322e-35	1	1	1	1
centr_pathway_CTSH.xlsx	5.742e-41	GBM	0.801044	1.51571e-09	GBM	0.694996	1.32053e-11	GBM	0.657148	3.0442e-40	4.64826e-09	5.3692e-11	1	1	0	0
centr_pathway_CTSK.xlsx	3.75432e-54	GBM	0.854621	6.87404e-13	GBM	0.727765	4.42595e-16	GBM	0.687626	4.92878e-53	3.3258e-12	2.95526e-15	1	1	0	0
centr_pathway_CTSL.xlsx	1.33476e-44	GBM	0.816185	8.18144e-12	GBM	0.717843	3.17939e-14	GBM	0.676757	9.01506e-44	3.2616e-11	1.70169e-13	1	1	0	0
centr_pathway_CTSO.xlsx	1.0894e-41	GBM	0.804933	4.92124e-09	GBM	0.690015	2.35249e-11	GBM	0.654138	5.93569e-41	1.4286e-08	9.31613e-11	1	1	0	0
centr_pathway_CTSS.xlsx	8.02203e-39	LGG	0.790745	3.1005e-08	LGG	0.679026	6.84033e-11	LGG	0.650303	3.76174e-38	8.33442e-08	2.57073e-10	1	1	0	0
centr_pathway_CTSV.xlsx	7.12503e-57	GBM	0.861019	1.95947e-11	GBM	0.713693	7.8892e-15	GBM	0.678842	1.2349e-55	7.42506e-11	4.54254e-14	1	1	0	0
centr_pathway_CTSZ.xlsx	0.0329731	GBM	0.555334	0.849305	LGG	0.51004	0.177891	GBM	0.525615	0.0365769	0.865817	0.214547	0	0	0	0
centr_pathway_CTTN.xlsx	8.53037e-15	GBM	0.72052	1.49719e-18	GBM	0.783263	1.25045e-31	GBM	0.766914	1.56105e-14	2.02324e-17	6.37645e-30	1	1	1	1
centr_pathway_CUBN.xlsx	0.18703	GBM	0.532465	0.698542	GBM	0.501463	0.013992	GBM	0.569982	0.200017	0.72797	0.0216346	1	0	0	0
centr_pathway_CUL1.xlsx	0.000249048	GBM	0.607908	0.00804524	GBM	0.597241	0.802011	LGG	0.520765	0.000303588	0.0110914	0.829071	0	0	0	0
centr_pathway_CUL2.xlsx	2.35484e-30	GBM	0.784786	2.76851e-06	GBM	0.67701	0.00949939	GBM	0.587016	7.30207e-30	6.01352e-06	0.0150123	1	1	0	0
centr_pathway_CUL3.xlsx	1.78453e-65	GBM	0.932197	1.04372e-19	GBM	0.786031	0.000200351	GBM	0.618338	6.53453e-64	1.77433e-18	0.0003984	1	1	0	0
centr_pathway_CUL5.xlsx	1.17639e-53	GBM	0.904059	4.15624e-17	GBM	0.768677	0.00468365	GBM	0.600071	1.46705e-52	4.23356e-16	0.00775919	1	1	0	0
centr_pathway_CUL7.xlsx	3.62125e-34	GBM	0.798585	5.31606e-07	GBM	0.684007	0.00219178	GBM	0.602827	1.33452e-33	1.23621e-06	0.00379131	1	1	0	0
centr_pathway_CWC15.xlsx	4.52967e-08	GBM	0.650835	1.09961e-12	GBM	0.724919	0.318585	GBM	0.549122	6.28001e-08	5.06038e-12	0.363448	1	0	0	0
centr_pathway_CX3CL1.xlsx	1.03304e-30	GBM	0.804493	1.69063e-05	GBM	0.637046	3.71658e-13	GBM	0.68099	3.25465e-30	3.10442e-05	1.74905e-12	1	1	0	0
centr_pathway_CX3CR1.xlsx	1.3165e-30	GBM	0.821052	0.000729927	GBM	0.606451	4.05667e-09	GBM	0.639814	4.1303e-30	0.00112924	1.27434e-08	1	1	0	0
centr_pathway_CXCL1.xlsx	7.01946e-44	GBM	0.864657	9.70729e-10	GBM	0.700648	1.71527e-21	GBM	0.727325	4.44367e-43	3.02176e-09	2.13191e-20	1	1	1	1
centr_pathway_CXCL10.xlsx	2.39036e-35	GBM	0.826697	6.58396e-06	GBM	0.643608	5.74407e-15	GBM	0.692395	9.62586e-35	1.36634e-05	3.37793e-14	1	1	0	0
centr_pathway_CXCL11.xlsx	1.30283e-37	GBM	0.830812	1.53871e-06	GBM	0.655744	7.32771e-17	GBM	0.704642	5.7689e-37	3.43545e-06	5.23056e-16	1	1	0	0
centr_pathway_CXCL12.xlsx	0.0242006	GBM	0.55152	0.961299	GBM	0.502569	0.00891412	GBM	0.562766	0.0270302	0.964928	0.0141294	1	0	0	0
centr_pathway_CXCL13.xlsx	5.69374e-35	GBM	0.82385	5.24296e-06	GBM	0.646573	6.64617e-16	GBM	0.699112	2.25396e-34	1.10718e-05	4.34042e-15	1	1	0	0
centr_pathway_CXCL14.xlsx	7.81517e-32	GBM	0.810214	6.62095e-06	GBM	0.644201	1.56803e-14	GBM	0.690564	2.61556e-31	1.37325e-05	8.71841e-14	1	1	0	0
centr_pathway_CXCL16.xlsx	1.13653e-32	GBM	0.810678	1.0037e-05	GBM	0.642106	8.93026e-15	GBM	0.691434	3.95616e-32	2.01552e-05	5.07525e-14	1	1	0	0
centr_pathway_CXCL2.xlsx	4.13781e-43	GBM	0.861609	2.07173e-09	GBM	0.697644	4.30879e-21	GBM	0.724496	2.4415e-42	6.26312e-09	5.07579e-20	1	1	0	0
centr_pathway_CXCL3.xlsx	1.09367e-32	GBM	0.811644	1.0718e-05	GBM	0.641671	7.67419e-15	GBM	0.691896	3.81764e-32	2.05472e-05	4.42902e-14	1	1	0	0
centr_pathway_CXCL5.xlsx	9.68774e-39	GBM	0.848174	0.0150373	GBM	0.575263	0.0140736	GBM	0.575077	4.5343e-38	0.020178	0.0217472	1	1	0	0
centr_pathway_CXCL6.xlsx	7.04729e-33	GBM	0.81325	8.29291e-06	GBM	0.643845	4.9049e-15	GBM	0.692848	2.47384e-32	1.69315e-05	2.89358e-14	1	1	0	0
centr_pathway_CXCL8.xlsx	0.0350058	GBM	0.562798	1.86089e-05	LGG	0.646573	0.4905	LGG	0.510357	0.0387857	3.39696e-05	0.537816	0	0	0	0
centr_pathway_CXCL9.xlsx	1.30283e-37	GBM	0.830812	1.53871e-06	GBM	0.655744	7.32771e-17	GBM	0.704642	5.7689e-37	3.43545e-06	5.23056e-16	1	1	0	0
centr_pathway_CXCR1.xlsx	9.00493e-31	GBM	0.82676	0.000195281	GBM	0.612657	1.67769e-09	GBM	0.64219	2.84426e-30	0.000318581	5.50481e-09	1	1	0	0
centr_pathway_CXCR2.xlsx	3.39842e-31	GBM	0.828855	0.000155383	GBM	0.614436	1.6832e-09	GBM	0.642217	1.09802e-30	0.0002558	5.5163e-09	1	1	0	0
centr_pathway_CXCR3.xlsx	1.0962e-30	GBM	0.825719	0.000634895	GBM	0.602301	4.79806e-08	GBM	0.626162	3.44928e-30	0.000988174	1.36238e-07	1	1	0	0
centr_pathway_CXCR4.xlsx	2.14381e-30	GBM	0.820488	0.00021494	GBM	0.616333	1.54714e-09	GBM	0.641047	6.65596e-30	0.000348833	5.09442e-09	1	1	0	0
centr_pathway_CXCR5.xlsx	8.52764e-31	GBM	0.826898	0.000264566	GBM	0.607676	7.01419e-09	GBM	0.636524	2.69693e-30	0.000426953	2.14723e-08	1	1	0	0
centr_pathway_CXCR6.xlsx	5.87956e-31	GBM	0.827902	0.000230858	GBM	0.608981	4.2198e-09	GBM	0.638817	1.87533e-30	0.000374014	1.32335e-08	1	1	0	0
centr_pathway_CXXC4.xlsx	1.02109e-07	GBM	0.66624	2.29513e-08	GBM	0.689224	0.0403071	GBM	0.556719	1.39443e-07	6.23477e-08	0.0566308	1	0	0	0
centr_pathway_CYBA.xlsx	1.28864e-64	GBM	0.919314	4.20728e-18	GBM	0.778757	1.07438e-23	GBM	0.736816	4.45653e-63	5.22124e-17	1.66294e-22	1	1	1	1
centr_pathway_CYBB.xlsx	2.05053e-60	GBM	0.904398	6.28012e-18	GBM	0.779113	1.16291e-26	GBM	0.74813	5.07201e-59	7.41074e-17	2.58443e-25	1	1	1	1
centr_pathway_CYC1.xlsx	4.36817e-23	GBM	0.785087	0.201212	GBM	0.541663	0.868243	GBM	0.503921	1.05565e-22	0.23039	0.889754	1	0	0	0
centr_pathway_CYCS.xlsx	3.53489e-40	GBM	0.903369	0.000397199	GBM	0.614594	0.398478	LGG	0.504238	1.80613e-39	0.00063101	0.446384	0	0	0	0
centr_pathway_CYFIP1.xlsx	0.00317633	GBM	0.558796	0.0135902	LGG	0.574472	2.42995e-05	LGG	0.602555	0.00369756	0.0183121	5.28667e-05	0	1	0	0
centr_pathway_CYFIP2.xlsx	0.272772	LGG	0.522329	0.781875	LGG	0.500356	0.74433	LGG	0.510403	0.288327	0.804677	0.77656	1	0	0	0
centr_pathway_CYLD.xlsx	0.000872491	LGG	0.595502	1.17354e-05	LGG	0.649103	3.04486e-05	LGG	0.606761	0.00103981	2.19607e-05	6.56121e-05	1	1	0	0
centr_pathway_CYP11A1.xlsx	0.0438547	GBM	0.541573	0.697796	LGG	0.535339	0.0464064	GBM	0.535478	0.0483891	0.727395	0.0645062	0	0	0	0
centr_pathway_CYP11B1.xlsx	0.0796448	LGG	0.530634	#NUM!	GBM	0.5	#NUM!	GBM	0.5	0.0869043	#NUM!	#NUM!	0	0	0	0
centr_pathway_CYP11B2.xlsx	4.67573e-14	GBM	0.689397	0.439088	GBM	0.516839	0.0225849	GBM	0.556035	8.4082e-14	0.477222	0.0332564	1	0	0	0
centr_pathway_CYP17A1.xlsx	2.65373e-58	LGG	0.910181	4.96038e-09	LGG	0.720215	8.55658e-14	LGG	0.733797	5.23044e-57	1.43884e-08	4.33359e-13	1	1	1	1
centr_pathway_CYP19A1.xlsx	1.43228e-45	GBM	0.868383	3.29198e-06	GBM	0.659222	5.95902e-11	GBM	0.651989	1.03455e-44	7.10832e-06	2.25203e-10	1	1	0	0
centr_pathway_CYP1A1.xlsx	0.518272	LGG	0.518578	5.08546e-05	LGG	0.631947	8.13305e-05	LGG	0.59105	0.534368	8.80818e-05	0.000168466	1	0	0	0
centr_pathway_CYP1A2.xlsx	2.01528e-11	GBM	0.676389	0.240152	GBM	0.537829	0.047604	GBM	0.552567	3.32102e-11	0.272213	0.066097	1	0	0	0
centr_pathway_CYP1B1.xlsx	1.72118e-05	GBM	0.625771	3.19458e-05	LGG	0.638865	1.11918e-08	LGG	0.625046	2.19444e-05	5.65545e-05	3.37068e-08	0	1	0	0
centr_pathway_CYP21A2.xlsx	0.34779	LGG	0.523772	0.100249	GBM	0.544885	0.187901	LGG	0.517048	0.364733	0.120319	0.225451	0	0	0	0
centr_pathway_CYP26A1.xlsx	8.906e-05	GBM	0.609752	0.613849	LGG	0.510159	0.0763364	GBM	0.54138	0.000110658	0.648789	0.0978015	0	0	0	0
centr_pathway_CYP26B1.xlsx	0.00270643	LGG	0.55995	0.010241	LGG	0.589296	0.660212	LGG	0.513938	0.00315546	0.0139789	0.69859	1	0	0	0
centr_pathway_CYP26C1.xlsx	0.00449881	LGG	0.5562	0.0505312	LGG	0.563879	0.886731	GBM	0.504329	0.00520299	0.0629762	0.90661	0	0	0	0
centr_pathway_CYP27A1.xlsx	0.000180439	GBM	0.586444	0.668569	GBM	0.510949	0.647157	GBM	0.513975	0.000221037	0.699868	0.685946	1	0	0	0
centr_pathway_CYP27B1.xlsx	1.18702e-27	GBM	0.882809	6.3603e-05	GBM	0.690055	2.32063e-10	GBM	0.684467	3.34604e-27	0.000108821	8.24289e-10	1	1	0	0
centr_pathway_CYP2A13.xlsx	3.01814e-09	LGG	0.648	0.0192056	LGG	0.568306	0.586002	GBM	0.514301	4.37522e-09	0.0254728	0.628915	0	0	0	0
centr_pathway_CYP2A6.xlsx	0.012018	LGG	0.558746	0.929318	GBM	0.505455	0.159563	GBM	0.541915	0.0135693	0.937863	0.194427	0	0	0	0
centr_pathway_CYP2A7.xlsx	5.50769e-33	LGG	0.826007	0.0372697	LGG	0.57803	0.0281509	LGG	0.537953	1.94343e-32	0.0472518	0.0407909	1	1	0	0
centr_pathway_CYP2B6.xlsx	0.0702802	GBM	0.551847	0.164541	GBM	0.552099	0.000233859	GBM	0.597714	0.0767646	0.191433	0.000462526	1	0	0	0
centr_pathway_CYP2C18.xlsx	0.00372583	LGG	0.581075	0.0112279	GBM	0.592221	0.599677	GBM	0.519586	0.00432711	0.0152728	0.641373	0	0	0	0
centr_pathway_CYP2C19.xlsx	4.3523e-10	LGG	0.664848	0.000237859	LGG	0.62329	6.26671e-12	LGG	0.662995	6.50103e-10	0.000384937	2.65844e-11	1	1	0	0
centr_pathway_CYP2C8.xlsx	7.61452e-06	GBM	0.618596	0.00072863	GBM	0.612025	2.27263e-05	GBM	0.602482	9.82562e-06	0.00112749	4.96325e-05	1	1	0	0
centr_pathway_CYP2C9.xlsx	3.61981e-14	GBM	0.705341	0.159999	GBM	0.538422	0.671012	GBM	0.513984	6.52509e-14	0.186586	0.708306	1	0	0	0
centr_pathway_CYP2D6.xlsx	3.17676e-30	GBM	0.801119	1.93904e-11	GBM	0.717843	4.60227e-13	GBM	0.664029	9.80191e-30	7.36636e-11	2.15226e-12	1	1	0	0
centr_pathway_CYP2E1.xlsx	0.89591	LGG	0.505595	0.324209	GBM	0.538145	0.217388	GBM	0.531118	0.899039	0.359878	0.258498	0	0	0	0
centr_pathway_CYP2F1.xlsx	7.8033e-06	LGG	0.631592	0.000109416	LGG	0.62246	1.46745e-08	LGG	0.630567	1.00657e-05	0.000182834	4.36307e-08	1	1	0	0
centr_pathway_CYP2G1P.CYP2GP1.xlsx	1.75817e-45	LGG	0.870064	1.2303e-13	LGG	0.75927	6.93102e-26	LGG	0.73838	1.2592e-44	6.67696e-13	1.39087e-24	1	1	1	1
centr_pathway_CYP2J2.xlsx	1.79814e-22	GBM	0.753625	9.26827e-07	GBM	0.663491	3.14655e-10	GBM	0.645498	4.26551e-22	2.10722e-06	1.0993e-09	1	1	0	0
centr_pathway_CYP2R1.xlsx	1.22574e-32	GBM	0.789879	2.67483e-09	GBM	0.699976	1.7367e-05	GBM	0.601231	4.25479e-32	7.98268e-09	3.83785e-05	1	1	0	0
centr_pathway_CYP2S1.xlsx	0.340725	LGG	0.516509	0.00117749	LGG	0.612222	0.130712	LGG	0.541525	0.357625	0.0017842	0.161949	1	0	0	0
centr_pathway_CYP2U1.xlsx	1.41365e-12	GBM	0.687164	0.00235049	GBM	0.603724	3.20813e-07	GBM	0.621674	2.42256e-12	0.00344523	8.38053e-07	1	1	0	0
centr_pathway_CYP39A1.xlsx	0.00021778	LGG	0.597195	2.44843e-09	LGG	0.696142	1.45047e-08	LGG	0.640104	0.000266081	7.33643e-09	4.31606e-08	1	1	0	0
centr_pathway_CYP3A4.xlsx	2.68712e-07	LGG	0.631015	0.000157123	LGG	0.620879	0.00928392	LGG	0.55302	3.62979e-07	0.00025855	0.0146905	1	1	0	0
centr_pathway_CYP3A43.xlsx	5.50769e-33	LGG	0.826007	0.0372697	LGG	0.57803	0.0281509	LGG	0.537953	1.94343e-32	0.0472518	0.0407909	1	1	0	0
centr_pathway_CYP3A5.xlsx	7.25211e-15	LGG	0.696723	2.0354e-10	LGG	0.703613	3.03265e-13	LGG	0.663757	1.32908e-14	6.83609e-10	1.43993e-12	1	1	0	0
centr_pathway_CYP3A7.CYP3A51P.xlsx	0.0603486	LGG	0.527623	0.00120784	LGG	0.612776	0.35719	LGG	0.529368	0.0660906	0.00182722	0.404084	1	0	0	0
centr_pathway_CYP3A7.xlsx	9.38697e-11	LGG	0.658989	0.000966577	LGG	0.614278	0.00925752	LGG	0.563373	1.50992e-10	0.00148333	0.0146518	1	1	0	0
centr_pathway_CYP46A1.xlsx	0.461345	GBM	0.508593	0.00219441	LGG	0.607676	0.224932	LGG	0.534037	0.4782	0.00322789	0.266871	0	0	0	0
centr_pathway_CYP4A11.xlsx	3.00126e-05	GBM	0.614808	0.108421	GBM	0.554629	1.6679e-05	GBM	0.605836	3.79219e-05	0.129334	3.70231e-05	1	0	0	0
centr_pathway_CYP4F2.xlsx	7.17103e-14	GBM	0.696059	0.001327	GBM	0.607874	7.49655e-07	GBM	0.616044	1.2736e-13	0.00199533	1.89385e-06	1	1	0	0
centr_pathway_CYP4F3.xlsx	3.67028e-14	GBM	0.697175	0.00175522	GBM	0.605898	5.86269e-07	GBM	0.617178	6.61448e-14	0.0026045	1.49479e-06	1	1	0	0
centr_pathway_CYP4F8.xlsx	6.74207e-18	GBM	0.724522	0.00022186	GBM	0.62499	9.29241e-11	GBM	0.652724	1.37793e-17	0.000359827	3.42485e-10	1	1	0	0
centr_pathway_CYP51A1.xlsx	6.05375e-35	LGG	0.826471	8.32074e-17	LGG	0.770179	6.48464e-15	LGG	0.675932	2.39014e-34	7.99435e-16	3.79247e-14	1	1	0	0
centr_pathway_CYP7A1.xlsx	0.387005	LGG	0.525616	0.262106	LGG	0.542652	0.300208	GBM	0.526476	0.404609	0.295255	0.347327	0	0	0	0
centr_pathway_CYP7B1.xlsx	5.52331e-14	LGG	0.713094	9.55537e-09	LGG	0.688711	0.00458634	LGG	0.549861	9.8777e-14	2.68184e-08	0.00760644	1	1	0	0
centr_pathway_CYP8B1.xlsx	1.61004e-08	GBM	0.66703	1.47277e-10	GBM	0.720531	2.97169e-18	GBM	0.700926	2.28173e-08	5.02579e-10	2.60285e-17	1	1	0	0
centr_pathway_CYR61.xlsx	5.66686e-49	GBM	0.865121	7.95817e-15	GBM	0.753222	4.06522e-26	GBM	0.745411	4.90515e-48	5.29076e-14	8.36066e-25	1	1	1	1
centr_pathway_CYSLTR1.xlsx	7.20403e-10	GBM	0.656769	0.658556	GBM	0.524113	0.980099	GBM	0.521417	1.06986e-09	0.691233	0.986459	1	0	0	0
centr_pathway_CYSLTR2.xlsx	4.43906e-10	GBM	0.665939	0.356868	GBM	0.54281	0.926494	GBM	0.520828	6.6293e-10	0.392908	0.93962	1	0	0	0
centr_pathway_CYTH1.xlsx	0.997532	LGG	0.50631	0.015425	LGG	0.563404	0.0926665	LGG	0.542341	0.997532	0.0206722	0.11759	1	0	0	0
centr_pathway_CYTH2.xlsx	0.403713	LGG	0.531863	0.00477095	LGG	0.580362	0.884156	GBM	0.502679	0.421369	0.00675766	0.904444	0	0	0	0
centr_pathway_CYTH3.xlsx	1.12621e-19	LGG	0.727658	0.166377	LGG	0.553641	0.00553331	LGG	0.570762	2.45415e-19	0.193478	0.00904798	1	0	0	0
centr_pathway_CYTH4.xlsx	1.43281e-30	GBM	0.804368	3.47524e-05	GBM	0.63341	0.000185179	GBM	0.580725	4.48578e-30	6.13044e-05	0.000371706	1	1	0	0
centr_pathway_D2HGDH.xlsx	6.69243e-23	LGG	0.752521	2.24012e-07	LGG	0.66523	7.27596e-11	LGG	0.632707	1.60903e-22	5.50856e-07	2.7262e-10	1	1	0	0
centr_pathway_DAAM1.xlsx	0.00112307	GBM	0.601937	1.46928e-07	GBM	0.666377	0.0289057	GBM	0.547164	0.00133312	3.69852e-07	0.0418032	1	1	0	0
centr_pathway_DAAM2.xlsx	2.57142e-41	LGG	0.861082	1.70112e-13	LGG	0.730018	1.70246e-22	LGG	0.724823	1.38991e-40	8.9516e-13	2.34719e-21	1	1	1	1
centr_pathway_DAB1.xlsx	2.92725e-47	LGG	0.884026	2.47916e-06	LGG	0.651316	0.022236	LGG	0.549321	2.33367e-46	5.41822e-06	0.0328076	1	1	0	0
centr_pathway_DAB2.xlsx	5.1778e-25	LGG	0.792865	0.0712993	LGG	0.551704	0.0324803	LGG	0.546874	1.33465e-24	0.0872177	0.0466016	1	0	0	0
centr_pathway_DAB2IP.xlsx	6.43986e-28	LGG	0.812735	4.42534e-11	LGG	0.716025	0.0515095	LGG	0.564252	1.82634e-27	1.59647e-10	0.0710499	1	0	0	0
centr_pathway_DAD1.xlsx	0.113545	GBM	0.530508	0.632798	LGG	0.523282	0.0192462	LGG	0.567616	0.122907	0.667396	0.0290116	0	0	0	0
centr_pathway_DAG1.xlsx	1.54295e-35	GBM	0.837611	5.0143e-23	GBM	0.80959	5.9398e-31	GBM	0.766289	6.28795e-35	2.47261e-21	2.3648e-29	1	1	1	1
centr_pathway_DAGLA.xlsx	0.0113538	GBM	0.576133	0.799057	GBM	0.505574	0.000552942	GBM	0.578404	0.012831	0.820546	0.00104325	1	0	0	0
centr_pathway_DAGLB.xlsx	5.55772e-15	GBM	0.720244	1.84853e-05	GBM	0.64179	6.52625e-10	GBM	0.645299	1.02206e-14	3.37854e-05	2.2166e-09	1	1	0	0
centr_pathway_DAO.xlsx	1.4573e-17	GBM	0.734344	0.0267314	GBM	0.56961	6.27884e-06	GBM	0.623161	2.95655e-17	0.0349253	1.44501e-05	1	1	0	0
centr_pathway_DAP.xlsx	1.91294e-31	GBM	0.808006	5.13502e-06	GBM	0.645901	2.40821e-14	GBM	0.689476	6.25916e-31	1.08592e-05	1.31061e-13	1	1	0	0
centr_pathway_DAP3.xlsx	5.35453e-58	GBM	0.898038	6.80822e-24	GBM	0.813661	3.01025e-27	GBM	0.754793	1.02824e-56	4.33282e-22	7.39648e-26	1	1	1	1
centr_pathway_DAPK1.xlsx	2.53294e-18	LGG	0.740303	0.223222	LGG	0.534588	0.69793	GBM	0.503839	5.2808e-18	0.254456	0.733082	0	0	0	0
centr_pathway_DAPK2.xlsx	2.53294e-18	LGG	0.740303	0.223222	LGG	0.534588	0.69793	GBM	0.503839	5.2808e-18	0.254456	0.733082	0	0	0	0
centr_pathway_DAPK3.xlsx	6.29675e-07	GBM	0.619951	0.0663111	GBM	0.573603	0.12177	GBM	0.537989	8.39342e-07	0.0813967	0.151551	1	0	0	0
centr_pathway_DAPP1.xlsx	9.39425e-12	GBM	0.685584	4.03108e-05	GBM	0.640485	2.10439e-08	GBM	0.631157	1.56361e-11	7.06411e-05	6.17547e-08	1	1	0	0
centr_pathway_DARS.xlsx	2.16088e-10	LGG	0.672487	2.50766e-05	LGG	0.654953	0.00265358	LGG	0.573916	3.42204e-10	4.50037e-05	0.00454996	1	1	0	0
centr_pathway_DARS1.xlsx	1.27565e-19	GBM	0.722615	0.000508023	GBM	0.61665	1.84136e-06	GBM	0.602537	2.77412e-19	0.000799733	4.43798e-06	1	1	0	0
centr_pathway_DARS2.xlsx	1.27565e-19	GBM	0.722615	0.000508023	GBM	0.61665	1.84136e-06	GBM	0.602537	2.77412e-19	0.000799733	4.43798e-06	1	1	0	0
centr_pathway_DAXX.xlsx	6.36737e-39	GBM	0.848562	6.62448e-09	GBM	0.686418	1.4931e-19	GBM	0.716981	3.0009e-38	1.88843e-08	1.53222e-18	1	1	0	0
centr_pathway_DAZAP1.xlsx	0.00299773	LGG	0.588652	0.0198669	GBM	0.565499	0.0444274	LGG	0.547128	0.00349128	0.0263266	0.0619404	0	0	0	0
centr_pathway_DBF4.xlsx	1.18471e-56	GBM	0.888053	1.44461e-14	GBM	0.755791	2.18415e-21	GBM	0.731585	1.98426e-55	9.25693e-14	2.6745e-20	1	1	1	1
centr_pathway_DBH.xlsx	0.0259626	LGG	0.550956	0.0568147	GBM	0.570243	0.021151	GBM	0.553972	0.0289679	0.0702985	0.0313433	0	0	0	0
centr_pathway_DBNL.xlsx	5.66011e-41	GBM	0.853655	1.68309e-16	GBM	0.769073	2.13856e-17	GBM	0.702875	3.00291e-40	1.51059e-15	1.61477e-16	1	1	1	1
centr_pathway_DBT.xlsx	0.000109067	LGG	0.598587	1.06076e-11	LGG	0.72148	9.01112e-10	LGG	0.639388	0.00013518	4.18127e-11	3.00977e-09	1	1	0	0
centr_pathway_DCC.xlsx	4.18453e-34	LGG	0.79797	1.49685e-13	LGG	0.744169	1.73604e-07	LGG	0.62957	1.53907e-33	7.93278e-13	4.66264e-07	1	1	0	0
centr_pathway_DCHS1.xlsx	2.34562e-44	GBM	0.874906	1.56845e-09	GBM	0.69464	0.000114937	GBM	0.603235	1.5506e-43	4.80407e-09	0.000235213	1	1	0	0
centr_pathway_DCK.xlsx	0.00193196	LGG	0.553477	0.00217686	LGG	0.592814	0.025525	LGG	0.557952	0.00227057	0.00320333	0.0371875	1	1	0	0
centr_pathway_DCLRE1C.xlsx	1.1124e-16	LGG	0.74088	0.0166345	GBM	0.58388	0.361747	GBM	0.512869	2.19368e-16	0.0221973	0.409115	0	0	0	0
centr_pathway_DCN.xlsx	1.95095e-29	GBM	0.834337	1.26066e-07	GBM	0.672425	4.05127e-10	GBM	0.647538	5.84113e-29	3.20153e-07	1.40222e-09	1	1	0	0
centr_pathway_DCP1A.xlsx	2.34105e-25	GBM	0.792865	1.45708e-13	GBM	0.738833	0.00639599	GBM	0.572294	6.12956e-25	7.74405e-13	0.0103248	1	1	0	0
centr_pathway_DCP1B.xlsx	1.42467e-38	GBM	0.874806	1.48835e-12	GBM	0.729425	0.905067	GBM	0.532033	6.61424e-38	6.65599e-12	0.921152	1	0	0	0
centr_pathway_DCP2.xlsx	1.12584e-23	GBM	0.774299	3.14795e-14	GBM	0.741363	0.000998446	GBM	0.583553	2.79032e-23	1.87517e-13	0.00182999	1	1	0	0
centr_pathway_DCT.xlsx	5.19357e-17	LGG	0.743364	8.97198e-09	LGG	0.711993	0.000247529	LGG	0.607985	1.0376e-16	2.5264e-08	0.000488044	1	1	0	0
centr_pathway_DCTD.xlsx	4.13342e-63	GBM	0.939736	5.96701e-10	GBM	0.702388	1.3956e-08	GBM	0.661735	1.25515e-61	1.89711e-09	4.16276e-08	1	1	0	0
centr_pathway_DCTN1.xlsx	1.97216e-16	GBM	0.685634	0.0134644	GBM	0.577556	0.0502261	GBM	0.542613	3.7891e-16	0.0181458	0.0694269	1	0	0	0
centr_pathway_DCTN2.xlsx	1.09581e-09	GBM	0.657785	6.29944e-07	GBM	0.659696	3.84059e-08	GBM	0.634602	1.61772e-09	1.45444e-06	1.10016e-07	1	1	0	0
centr_pathway_DCTN3.xlsx	1.09581e-09	GBM	0.657785	6.29944e-07	GBM	0.659696	3.84059e-08	GBM	0.634602	1.61772e-09	1.45444e-06	1.10016e-07	1	1	0	0
centr_pathway_DCTN4.xlsx	1.28276e-22	GBM	0.720909	0.00271492	GBM	0.594197	0.0598196	GBM	0.541362	3.05069e-22	0.00395835	0.0782427	1	0	0	0
centr_pathway_DCTN5.xlsx	1.28276e-22	GBM	0.720909	0.00271492	GBM	0.594197	0.0598196	GBM	0.541362	3.05069e-22	0.00395835	0.0782427	1	0	0	0
centr_pathway_DCTN6.xlsx	1.76001e-16	GBM	0.6867	0.00863347	GBM	0.580362	0.0734393	GBM	0.540791	3.38672e-16	0.0118585	0.0942519	1	0	0	0
centr_pathway_DCTPP1.xlsx	8.24324e-68	GBM	0.932962	3.12896e-21	GBM	0.807257	1.25516e-13	GBM	0.672722	3.97271e-66	7.34961e-20	6.19675e-13	1	1	0	0
centr_pathway_DCX.xlsx	7.50375e-40	LGG	0.870666	5.7427e-17	LGG	0.763183	9.05849e-14	LGG	0.677473	3.78737e-39	5.68619e-16	4.54981e-13	1	1	0	0
centr_pathway_DCXR.xlsx	5.40455e-12	GBM	0.689636	3.77476e-07	LGG	0.657957	6.03209e-08	LGG	0.629588	9.07032e-12	9.08137e-07	1.6845e-07	0	1	0	0
centr_pathway_DDB1.xlsx	3.29683e-16	GBM	0.72752	3.62953e-10	GBM	0.699383	1.72326e-05	GBM	0.599654	6.2873e-16	1.18325e-09	3.81042e-05	1	1	0	0
centr_pathway_DDB2.xlsx	1.10329e-20	GBM	0.759408	5.81591e-13	GBM	0.734011	8.24843e-06	GBM	0.606643	2.46902e-20	2.85466e-12	1.88373e-05	1	1	0	0
centr_pathway_DDC.xlsx	0.0156693	GBM	0.549852	0.0162217	LGG	0.585778	0.406703	GBM	0.508472	0.0176147	0.021693	0.452872	0	0	0	0
centr_pathway_DDIT3.xlsx	0.0376077	GBM	0.560766	0.0354743	GBM	0.570915	0.00878736	GBM	0.555513	0.0416254	0.0451062	0.0139522	1	1	0	0
centr_pathway_DDIT4.xlsx	3.46449e-48	LGG	0.890148	0.000121224	LGG	0.647087	1.01483e-10	LGG	0.651164	2.90457e-47	0.000201615	3.72923e-10	1	1	0	0
centr_pathway_DDO.xlsx	6.17219e-15	GBM	0.726893	0.612789	LGG	0.506562	0.673065	GBM	0.513721	1.13339e-14	0.647852	0.709869	0	0	0	0
centr_pathway_DDOST.xlsx	3.75594e-19	GBM	0.750815	0.0431043	GBM	0.551625	0.0269121	LGG	0.540945	8.05076e-19	0.0541797	0.0390872	0	0	0	0
centr_pathway_DDR1.xlsx	4.83641e-15	GBM	0.709105	0.00220372	GBM	0.597597	1.06002e-08	GBM	0.62754	8.90071e-15	0.00324095	3.20157e-08	1	1	0	0
centr_pathway_DDR2.xlsx	1.49758e-14	GBM	0.704639	0.00104038	GBM	0.606886	7.32542e-10	GBM	0.64092	2.72387e-14	0.00159069	2.46109e-09	1	1	0	0
centr_pathway_DDX17.xlsx	1.02931e-23	GBM	0.786969	0.0567885	GBM	0.524468	0.146554	LGG	0.571713	2.55532e-23	0.070288	0.179998	0	0	0	0
centr_pathway_DDX20.xlsx	1.30424e-31	GBM	0.820262	8.64731e-14	GBM	0.75081	1.50801e-09	GBM	0.654936	4.29951e-31	4.74837e-13	4.97217e-09	1	1	0	0
centr_pathway_DDX23.xlsx	4.52967e-08	GBM	0.650835	1.09961e-12	GBM	0.724919	0.318585	GBM	0.549122	6.28001e-08	5.06038e-12	0.363448	1	0	0	0
centr_pathway_DDX39B.xlsx	2.10431e-08	GBM	0.640574	1.3112e-09	GBM	0.697051	0.980547	GBM	0.508925	2.97037e-08	4.04608e-09	0.986776	1	0	0	0
centr_pathway_DDX3X.xlsx	0.00844539	LGG	0.569597	0.00864745	GBM	0.608467	0.000220725	GBM	0.564597	0.00961986	0.0118755	0.000437512	0	1	0	0
centr_pathway_DDX41.xlsx	4.01177e-50	GBM	0.888115	4.23135e-17	GBM	0.769428	0.0042668	GBM	0.568287	3.82733e-49	4.30419e-16	0.00710338	1	1	0	0
centr_pathway_DDX5.xlsx	5.16345e-33	GBM	0.824389	2.42672e-10	GBM	0.747885	2.59707e-06	GBM	0.596807	1.82714e-32	8.08473e-10	6.15771e-06	1	1	0	0
centr_pathway_DDX54.xlsx	0.00614731	GBM	0.567628	0.773805	GBM	0.523599	0.734948	LGG	0.508472	0.00706359	0.797475	0.767418	0	0	0	0
centr_pathway_DDX58.xlsx	1.77608e-33	GBM	0.817602	3.29408e-08	GBM	0.686932	5.17313e-27	GBM	0.749699	6.37238e-33	8.82848e-08	1.23442e-25	1	1	0	0
centr_pathway_DDX6.xlsx	2.7061e-31	GBM	0.836043	2.76817e-09	GBM	0.68792	0.981265	LGG	0.528026	8.76989e-31	8.25132e-09	0.987366	0	0	0	0
centr_pathway_DEF6.xlsx	9.96497e-27	GBM	0.756322	5.10829e-08	GBM	0.683256	0.00924959	GBM	0.575004	2.7357e-26	1.3412e-07	0.0146424	1	1	0	0
centr_pathway_DEFA1B.xlsx	2.71997e-24	GBM	0.80556	3.59479e-07	GBM	0.670211	1.22384e-10	GBM	0.645444	6.86888e-24	8.6568e-07	4.46642e-10	1	1	0	0
centr_pathway_DEFA3.xlsx	2.71997e-24	GBM	0.80556	3.59479e-07	GBM	0.670211	1.22384e-10	GBM	0.645444	6.86888e-24	8.6568e-07	4.46642e-10	1	1	0	0
centr_pathway_DEGS1.xlsx	2.62674e-05	LGG	0.612813	6.42469e-05	LGG	0.634596	0.0130299	LGG	0.576836	3.33193e-05	0.000109872	0.0202142	1	1	0	0
centr_pathway_DEGS2.xlsx	4.03477e-16	LGG	0.725902	4.60039e-07	LGG	0.673571	5.28464e-05	LGG	0.606553	7.65939e-16	1.09861e-06	0.000111457	1	1	0	0
centr_pathway_DEPDC1B.xlsx	2.00071e-74	GBM	0.92245	3.28033e-16	GBM	0.753143	3.80763e-11	GBM	0.649995	2.0473e-72	2.83028e-15	1.47645e-10	1	1	0	0
centr_pathway_DEPDC7.xlsx	6.59739e-48	GBM	0.858096	1.49702e-11	GBM	0.707724	6.17166e-07	GBM	0.614621	5.50028e-47	5.75467e-11	1.57195e-06	1	1	0	0
centr_pathway_DEPTOR.xlsx	2.67865e-25	LGG	0.767613	0.0250345	LGG	0.568503	0.000111105	LGG	0.586989	6.9939e-25	0.0328354	0.000227559	1	1	0	0
centr_pathway_DERA.xlsx	3.24073e-30	GBM	0.799388	3.45029e-14	GBM	0.737252	7.321e-13	GBM	0.66042	9.98277e-30	2.03572e-13	3.37491e-12	1	1	0	0
centr_pathway_DERL1.xlsx	1.52292e-12	LGG	0.684706	2.16482e-06	LGG	0.657997	1.20801e-05	LGG	0.607196	2.60743e-12	4.76197e-06	2.71465e-05	1	1	0	0
centr_pathway_DERL2.xlsx	2.82101e-10	GBM	0.680328	0.000375208	GBM	0.612341	0.00559753	GBM	0.56078	4.23407e-10	0.000597477	0.00914096	1	1	0	0
centr_pathway_DES.xlsx	5.86466e-33	GBM	0.806651	1.77812e-09	GBM	0.704957	4.8487e-07	GBM	0.631256	2.06744e-32	5.41509e-09	1.24435e-06	1	1	0	0
centr_pathway_DET1.xlsx	3.62125e-34	GBM	0.798585	5.31606e-07	GBM	0.684007	0.00219178	GBM	0.602827	1.33452e-33	1.23621e-06	0.00379131	1	1	0	0
centr_pathway_DFFA.xlsx	1.60014e-69	LGG	0.922111	2.27777e-08	LGG	0.690924	0.00154475	LGG	0.577932	9.79758e-68	6.18987e-08	0.00275003	1	1	0	0
centr_pathway_DFFB.xlsx	4.42313e-30	GBM	0.861421	0.000209699	GBM	0.638786	0.00111035	GBM	0.637394	1.35302e-29	0.000340698	0.00202165	1	1	0	0
centr_pathway_DGAT1.xlsx	1.49168e-05	LGG	0.60644	1.71576e-11	LGG	0.722508	2.82441e-05	LGG	0.597478	1.90444e-05	6.54485e-11	6.10916e-05	1	1	0	0
centr_pathway_DGAT2.xlsx	2.1463e-27	LGG	0.776042	1.48238e-14	LGG	0.749348	7.871e-07	LGG	0.614603	6.00483e-27	9.44212e-14	1.98239e-06	1	1	0	0
centr_pathway_DGKA.xlsx	0.00456972	GBM	0.569723	0.452178	LGG	0.524824	0.556741	LGG	0.515643	0.00528336	0.490446	0.601937	0	0	0	0
centr_pathway_DGKB.xlsx	0.561285	GBM	0.508944	0.00068526	LGG	0.618745	0.106986	LGG	0.545278	0.577839	0.00106323	0.134501	0	0	0	0
centr_pathway_DGKD.xlsx	0.0314965	GBM	0.551734	0.126439	LGG	0.555736	0.728623	LGG	0.51315	0.0349649	0.149415	0.76124	0	0	0	0
centr_pathway_DGKE.xlsx	0.233237	GBM	0.524939	0.0855559	LGG	0.562732	0.625009	LGG	0.517093	0.247906	0.103602	0.663604	0	0	0	0
centr_pathway_DGKG.xlsx	0.0613055	GBM	0.54856	0.0230805	LGG	0.583722	0.500502	LGG	0.518217	0.0671189	0.030342	0.547253	0	0	0	0
centr_pathway_DGKH.xlsx	0.0633582	GBM	0.543542	0.189873	LGG	0.549806	0.824029	LGG	0.510974	0.0693357	0.218482	0.850297	0	0	0	0
centr_pathway_DGKI.xlsx	0.80992	GBM	0.500013	0.0131789	LGG	0.589019	0.283812	LGG	0.529885	0.81714	0.0177869	0.329844	0	0	0	0
centr_pathway_DGKK.xlsx	0.0064895	LGG	0.57326	0.0524921	LGG	0.569175	0.4847	LGG	0.521354	0.00744991	0.065295	0.531849	1	0	0	0
centr_pathway_DGKQ.xlsx	0.0479433	GBM	0.54777	0.242363	LGG	0.545221	0.736578	LGG	0.51237	0.0527836	0.274511	0.769012	0	0	0	0
centr_pathway_DGKZ.xlsx	0.00162352	LGG	0.566009	3.78888e-07	LGG	0.655506	0.000284304	LGG	0.5829	0.00191288	9.09693e-07	0.000556571	1	1	0	0
centr_pathway_DGUOK.xlsx	1.58904e-08	GBM	0.64494	0.1641	LGG	0.550992	0.78396	GBM	0.514573	2.25368e-08	0.19098	0.812215	0	0	0	0
centr_pathway_DHCR24.xlsx	4.51277e-05	LGG	0.598838	4.16676e-13	LGG	0.734208	1.07209e-14	LGG	0.672732	5.67229e-05	2.08366e-12	6.06054e-14	1	1	0	0
centr_pathway_DHCR7.xlsx	0.00225995	LGG	0.57967	6.81146e-10	LGG	0.70891	0.00516184	LGG	0.564524	0.0026473	2.15181e-09	0.00849468	1	1	0	0
centr_pathway_DHDDS.xlsx	2.17502e-16	GBM	0.732914	0.300702	LGG	0.55289	0.00247009	LGG	0.576718	4.17778e-16	0.335737	0.00424904	0	0	0	0
centr_pathway_DHDH.xlsx	3.04312e-15	GBM	0.712994	0.991462	LGG	0.500158	0.178938	LGG	0.528597	5.63933e-15	0.992129	0.215775	0	0	0	0
centr_pathway_DHFR.xlsx	0.497358	LGG	0.513799	0.0308308	GBM	0.565499	0.0164455	LGG	0.540047	0.513868	0.0394241	0.0251359	0	0	0	0
centr_pathway_DHFR2.xlsx	6.39891e-37	LGG	0.86403	#NUM!	GBM	0.5	#NUM!	GBM	0.5	2.75345e-36	#NUM!	#NUM!	0	0	0	0
centr_pathway_DHH.xlsx	0.201963	LGG	0.531976	0.779792	GBM	0.520634	0.95863	LGG	0.503939	0.215277	0.803211	0.967598	0	0	0	0
centr_pathway_DHODH.xlsx	0.254897	GBM	0.538988	3.65753e-09	GBM	0.694877	0.00262782	GBM	0.590815	0.270044	1.07602e-08	0.0045089	1	0	0	0
centr_pathway_DHPS.xlsx	0.155023	GBM	0.535087	0.830898	LGG	0.517709	0.0020251	LGG	0.552114	0.166358	0.849145	0.00357019	0	0	0	0
centr_pathway_DHRS3.xlsx	1.99669e-17	GBM	0.700123	0.928021	GBM	0.508103	0.0144865	GBM	0.550563	4.03116e-17	0.936701	0.0223434	1	0	0	0
centr_pathway_DHRS4.xlsx	1.99669e-17	GBM	0.700123	0.928021	GBM	0.508103	0.0144865	GBM	0.550563	4.03116e-17	0.936701	0.0223434	1	0	0	0
centr_pathway_DHRS4L1.xlsx	6.70775e-13	GBM	0.672876	0.834792	GBM	0.512807	0.0128646	GBM	0.558251	1.15774e-12	0.852539	0.0199702	1	0	0	0
centr_pathway_DHRS4L2.xlsx	1.58813e-14	GBM	0.678308	0.91548	LGG	0.501067	0.410183	GBM	0.521871	2.88435e-14	0.926052	0.456406	0	0	0	0
centr_pathway_DHRS9.xlsx	4.50691e-18	GBM	0.702218	0.917389	GBM	0.510949	0.03026	GBM	0.54584	9.30018e-18	0.927604	0.0436939	1	0	0	0
centr_pathway_DHTKD1.xlsx	2.04477e-26	LGG	0.783933	2.19153e-07	LGG	0.665902	0.113756	LGG	0.552775	5.54628e-26	5.3962e-07	0.142578	1	0	0	0
centr_pathway_DHX36.xlsx	6.73573e-18	GBM	0.752609	5.35534e-07	GBM	0.680449	1.20158e-21	GBM	0.722565	1.37701e-17	1.2434e-06	1.52398e-20	1	1	0	0
centr_pathway_DHX38.xlsx	3.16484e-11	GBM	0.686299	4.16916e-14	GBM	0.743735	0.0368719	GBM	0.569991	5.1675e-11	2.40275e-13	0.0522083	1	0	0	0
centr_pathway_DHX58.xlsx	5.1773e-13	GBM	0.700926	0.00150295	GBM	0.620919	4.79515e-11	GBM	0.653685	8.95864e-13	0.00224313	1.8383e-10	1	1	0	0
centr_pathway_DHX9.xlsx	5.86854e-09	GBM	0.661047	1.55402e-13	GBM	0.735948	0.209837	GBM	0.555504	8.43525e-09	8.20075e-13	0.250077	1	0	0	0
centr_pathway_DIABLO.xlsx	2.71132e-42	LGG	0.859476	8.09587e-05	LGG	0.6359	0.000100483	LGG	0.594604	1.5194e-41	0.000137316	0.000206656	1	1	0	0
centr_pathway_DIAPH1.xlsx	0.00334147	LGG	0.589668	1.90603e-09	LGG	0.693849	1.26594e-11	LGG	0.659659	0.00388615	5.79041e-09	5.18139e-11	1	1	0	0
centr_pathway_DIAPH2.xlsx	7.30172e-11	GBM	0.681544	2.57435e-06	GBM	0.651158	0.935259	GBM	0.507021	1.17877e-10	5.60814e-06	0.947605	1	0	0	0
centr_pathway_DIAPH3.xlsx	3.16938e-53	GBM	0.85841	9.08624e-11	GBM	0.700569	2.5203e-10	GBM	0.646251	3.84339e-52	3.18832e-10	8.90961e-10	1	1	0	0
centr_pathway_DICER1.xlsx	2.31156e-23	LGG	0.76543	0.336819	GBM	0.5285	0.0604474	GBM	0.542586	5.64477e-23	0.372597	0.0788835	0	0	0	0
centr_pathway_DIO1.xlsx	0.246457	GBM	0.534234	0.225226	LGG	0.541466	0.234871	LGG	0.532885	0.261287	0.256388	0.277338	0	0	0	0
centr_pathway_DIO2.xlsx	0.246457	GBM	0.534234	0.225226	LGG	0.541466	0.234871	LGG	0.532885	0.261287	0.256388	0.277338	0	0	0	0
centr_pathway_DIO3.ITDI3.TXDI3.xlsx	#NUM!	GBM	0.5	#NUM!	GBM	0.5	#NUM!	GBM	0.5	#NUM!	#NUM!	#NUM!	1	0	0	0
centr_pathway_DIRAS3.xlsx	4.45925e-23	GBM	0.771489	5.41889e-13	GBM	0.729465	6.76531e-19	GBM	0.698723	1.07732e-22	2.67922e-12	6.44089e-18	1	1	0	0
centr_pathway_DIS3.xlsx	0.00898518	GBM	0.566072	3.7769e-10	GBM	0.698553	1.98075e-05	GBM	0.606145	0.0101959	1.22433e-09	4.34365e-05	1	1	0	0
centr_pathway_DISP1.xlsx	0.00234943	LGG	0.619173	0.969454	LGG	0.533007	0.0173636	GBM	0.54817	0.00274694	0.972458	0.0262962	0	0	0	0
centr_pathway_DISP2.xlsx	0.000360003	LGG	0.59727	2.08978e-05	LGG	0.66195	0.000137044	LGG	0.580036	0.000435996	3.78693e-05	0.000278237	1	1	0	0
centr_pathway_DKC1.xlsx	9.10366e-13	GBM	0.702431	3.75829e-11	GBM	0.720847	0.10007	GBM	0.550101	1.56656e-12	1.37245e-10	0.126168	1	0	0	0
centr_pathway_DKK1.xlsx	0.000200862	GBM	0.587373	0.00111872	GBM	0.580718	7.94691e-05	GBM	0.572412	0.000245692	0.00170382	0.000164942	1	1	0	0
centr_pathway_DKK2.xlsx	0.00425172	GBM	0.562045	0.0052024	GBM	0.552178	0.00105235	GBM	0.552893	0.00492238	0.00732685	0.00192028	1	1	0	0
centr_pathway_DKK4.xlsx	0.00425172	GBM	0.562045	0.0052024	GBM	0.552178	0.00105235	GBM	0.552893	0.00492238	0.00732685	0.00192028	1	1	0	0
centr_pathway_DLAT.xlsx	3.32651e-06	GBM	0.622748	0.508843	LGG	0.522887	0.258116	GBM	0.530828	4.3359e-06	0.547521	0.302388	0	0	0	0
centr_pathway_DLC1.xlsx	1.8201e-49	GBM	0.860743	1.89134e-11	GBM	0.708475	8.43631e-09	GBM	0.630848	1.66212e-48	7.19252e-11	2.5657e-08	1	1	0	0
centr_pathway_DLD.xlsx	0.00102564	GBM	0.594147	0.0974568	LGG	0.572614	0.774642	GBM	0.507447	0.00121844	0.117175	0.803456	0	0	0	0
centr_pathway_DLG1.xlsx	9.40502e-44	LGG	0.8486	1.16366e-17	LGG	0.768915	3.70679e-18	LGG	0.715186	5.88405e-43	1.2971e-16	3.21016e-17	1	1	1	1
centr_pathway_DLG2.xlsx	8.81728e-49	LGG	0.858949	2.67032e-14	LGG	0.74749	2.01354e-25	LGG	0.74037	7.55334e-48	1.60998e-13	3.74771e-24	1	1	1	1
centr_pathway_DLG3.xlsx	2.45191e-47	LGG	0.829056	2.73094e-09	LGG	0.68962	5.83372e-21	LGG	0.720924	1.96944e-46	8.14361e-09	6.76511e-20	1	1	0	0
centr_pathway_DLG4.xlsx	7.32589e-56	LGG	0.876813	6.61631e-17	LGG	0.783343	5.47827e-17	LGG	0.727669	1.13536e-54	6.47372e-16	3.96657e-16	1	1	1	1
centr_pathway_DLGAP1.xlsx	2.39173e-53	LGG	0.886798	1.73752e-18	LGG	0.775832	1.29906e-22	LGG	0.74668	2.92889e-52	2.31442e-17	1.80776e-21	1	1	1	1
centr_pathway_DLGAP5.xlsx	5.48542e-93	GBM	0.918523	1.4905e-24	GBM	0.820025	3.59917e-31	GBM	0.772925	4.09761e-90	1.10966e-22	1.49209e-29	1	1	1	1
centr_pathway_DLK1.xlsx	2.52296e-21	GBM	0.777297	0.160294	GBM	0.514942	0.638364	GBM	0.537142	5.74414e-21	0.1869	0.677108	1	0	0	0
centr_pathway_DLL1.xlsx	1.9997e-12	GBM	0.694227	4.35607e-06	GBM	0.653728	0.00241174	GBM	0.567861	3.40889e-12	9.29378e-06	0.00415346	1	1	0	0
centr_pathway_DLL3.xlsx	3.94566e-07	LGG	0.629159	0.0396432	GBM	0.568385	0.466673	GBM	0.51412	5.30109e-07	0.0500311	0.513582	0	0	0	0
centr_pathway_DLL4.xlsx	9.24065e-05	GBM	0.618458	0.00732644	GBM	0.576093	0.185506	LGG	0.52945	0.00011474	0.0101569	0.22297	0	0	0	0
centr_pathway_DLST.xlsx	3.88674e-14	LGG	0.693813	8.51384e-12	LGG	0.743063	3.09301e-07	LGG	0.629634	7.00119e-14	3.38643e-11	8.09685e-07	1	1	0	0
centr_pathway_DLX1.xlsx	5.30801e-23	LGG	0.729715	0.0615283	LGG	0.566408	0.000950761	LGG	0.572946	1.27865e-22	0.075939	0.00174646	1	0	0	0
centr_pathway_DMAC2L.xlsx	1.35288e-23	LGG	0.771552	1.41922e-13	LGG	0.74077	0.000380051	LGG	0.60309	3.32543e-23	7.56444e-13	0.000729247	1	1	0	0
centr_pathway_DMAP1.xlsx	1.39636e-43	GBM	0.925021	4.09917e-06	GBM	0.662424	0.0070074	GBM	0.608529	8.62052e-43	8.76829e-06	0.011263	1	1	0	0
centr_pathway_DMC1.xlsx	2.50196e-58	GBM	0.916328	1.14412e-19	GBM	0.794569	3.52048e-09	GBM	0.760469	4.95239e-57	1.93617e-18	1.11248e-08	1	1	1	1
centr_pathway_DMD.xlsx	0.0056496	LGG	0.583496	0.0118712	GBM	0.584671	0.672429	LGG	0.504719	0.00651173	0.0161243	0.709551	0	0	0	0
centr_pathway_DMGDH.xlsx	0.715959	GBM	0.509145	0.00635376	GBM	0.591074	2.15142e-07	GBM	0.627549	0.728342	0.00885459	5.7164e-07	1	0	0	0
centr_pathway_DNA2.xlsx	5.85056e-55	GBM	0.903269	9.86301e-18	GBM	0.781485	3.78523e-15	GBM	0.681498	8.37235e-54	1.11441e-16	2.26354e-14	1	1	0	0
centr_pathway_DNAH1.xlsx	8.06736e-06	LGG	0.617781	8.75332e-11	LGG	0.70808	1.81431e-10	LGG	0.655788	1.03938e-05	3.08021e-10	6.50338e-10	1	1	0	0
centr_pathway_DNAH3.xlsx	8.06736e-06	LGG	0.617781	8.75332e-11	LGG	0.70808	1.81431e-10	LGG	0.655788	1.03938e-05	3.08021e-10	6.50338e-10	1	1	0	0
centr_pathway_DNAH5.xlsx	8.06736e-06	LGG	0.617781	8.75332e-11	LGG	0.70808	1.81431e-10	LGG	0.655788	1.03938e-05	3.08021e-10	6.50338e-10	1	1	0	0
centr_pathway_DNAH6.xlsx	8.06736e-06	LGG	0.617781	8.75332e-11	LGG	0.70808	1.81431e-10	LGG	0.655788	1.03938e-05	3.08021e-10	6.50338e-10	1	1	0	0
centr_pathway_DNAH8.xlsx	8.06736e-06	LGG	0.617781	8.75332e-11	LGG	0.70808	1.81431e-10	LGG	0.655788	1.03938e-05	3.08021e-10	6.50338e-10	1	1	0	0
centr_pathway_DNAJA1.xlsx	1.29506e-17	LGG	0.744706	0.0600965	LGG	0.566685	0.0134387	LGG	0.554498	2.63169e-17	0.074221	0.0208136	1	0	0	0
centr_pathway_DNAJA3.xlsx	6.15351e-18	GBM	0.755908	0.00873187	GBM	0.580125	0.000767831	GBM	0.569909	1.25971e-17	0.0119804	0.00142627	1	1	0	0
centr_pathway_DNAJB1.xlsx	4.80235e-68	LGG	0.916566	4.41731e-21	LGG	0.802	2.6028e-29	LGG	0.758229	2.44038e-66	9.99735e-20	7.97443e-28	1	1	1	1
centr_pathway_DNAJB11.xlsx	1.63527e-35	GBM	0.840923	1.68333e-21	GBM	0.808167	8.50382e-13	GBM	0.666005	6.62802e-35	4.22024e-20	3.8746e-12	1	1	0	0
centr_pathway_DNAJB1P1.xlsx	8.12627e-08	GBM	0.657183	3.46746e-16	LGG	0.777769	4.40531e-06	LGG	0.616207	1.11402e-07	2.96426e-15	1.02781e-05	0	1	0	0
centr_pathway_DNAJB6.xlsx	0.884322	LGG	0.515292	2.71343e-13	LGG	0.74496	0.000481772	LGG	0.589908	0.888007	1.38575e-12	0.000915699	1	0	0	0
centr_pathway_DNAJC3.xlsx	2.10241e-24	LGG	0.775465	2.13114e-10	LGG	0.707012	1.01026e-14	LGG	0.676004	5.32372e-24	7.12231e-10	5.72837e-14	1	1	0	0
centr_pathway_DNAJC5.xlsx	5.52494e-26	LGG	0.752634	1.95379e-12	LGG	0.728793	1.03143e-11	LGG	0.682785	1.48404e-25	8.52251e-12	4.25429e-11	1	1	0	0
centr_pathway_DNAJC6.xlsx	1.67438e-05	GBM	0.609464	0.0642797	GBM	0.559214	2.11894e-06	GBM	0.60037	2.13586e-05	0.0790595	5.06112e-06	1	0	0	0
centr_pathway_DNAJC8.xlsx	4.52967e-08	GBM	0.650835	1.09961e-12	GBM	0.724919	0.318585	GBM	0.549122	6.28001e-08	5.06038e-12	0.363448	1	0	0	0
centr_pathway_DNAL4.xlsx	2.30516e-08	LGG	0.660783	3.97009e-06	LGG	0.659815	3.82607e-07	LGG	0.614938	3.25142e-08	8.49707e-06	9.92512e-07	1	1	0	0
centr_pathway_DNASE2.xlsx	0.00682653	GBM	0.576032	0.469842	GBM	0.527473	0.055366	GBM	0.541208	0.00781999	0.508125	0.0741972	1	0	0	0
centr_pathway_DNER.xlsx	1.47306e-27	LGG	0.831364	1.29365e-13	LGG	0.748439	6.06212e-23	LGG	0.730933	4.14611e-27	7.00036e-13	8.74661e-22	1	1	1	1
centr_pathway_DNM1.xlsx	1.64386e-09	GBM	0.652968	0.659005	GBM	0.51008	0.46112	GBM	0.51567	2.40967e-09	0.69151	0.507846	1	0	0	0
centr_pathway_DNM1L.xlsx	0.0342809	GBM	0.562936	0.369933	LGG	0.545893	0.376224	LGG	0.527772	0.0379995	0.406152	0.42375	0	0	0	0
centr_pathway_DNM2.xlsx	3.10745e-18	GBM	0.720821	1.20419e-07	GBM	0.670804	1.73624e-11	GBM	0.648753	6.46231e-18	3.07279e-07	6.94588e-11	1	1	0	0
centr_pathway_DNM3.xlsx	1.54221e-23	GBM	0.74921	6.28636e-07	GBM	0.658748	7.90909e-08	GBM	0.622354	3.78709e-23	1.45232e-06	2.18572e-07	1	1	0	0
centr_pathway_DNMBP.xlsx	8.28411e-06	GBM	0.624153	0.00120253	GBM	0.60819	2.2231e-05	GBM	0.594604	1.06675e-05	0.0018203	4.85936e-05	1	1	0	0
centr_pathway_DNMT1.xlsx	4.70468e-49	GBM	0.921873	9.89991e-19	GBM	0.799194	1.26837e-06	GBM	0.722901	4.10082e-48	1.38043e-17	3.10422e-06	1	1	1	1
centr_pathway_DNMT3A.xlsx	2.46253e-49	GBM	0.933125	7.16286e-19	GBM	0.798126	2.67747e-05	GBM	0.713164	2.21895e-48	1.0237e-17	5.79975e-05	1	1	1	1
centr_pathway_DNMT3B.xlsx	5.7818e-47	GBM	0.922512	3.63959e-18	GBM	0.794411	4.27055e-06	GBM	0.719111	4.51779e-46	4.54704e-17	9.98249e-06	1	1	1	1
centr_pathway_DNTT.xlsx	3.85245e-05	LGG	0.614331	0.000195316	GBM	0.620761	0.139672	GBM	0.538987	4.85455e-05	0.000318581	0.172047	0	0	0	0
centr_pathway_DOCK1.xlsx	0.000229919	GBM	0.608197	0.00189133	GBM	0.608665	0.000859995	GBM	0.587379	0.000280591	0.00279477	0.00158914	1	1	0	0
centr_pathway_DOCK10.xlsx	0.167455	LGG	0.540669	0.711668	LGG	0.500356	0.584071	GBM	0.502262	0.179468	0.740349	0.627023	0	0	0	0
centr_pathway_DOCK11.xlsx	4.51113e-33	GBM	0.807529	3.11349e-11	GBM	0.714523	5.53264e-13	GBM	0.666449	1.59858e-32	1.15339e-10	2.57459e-12	1	1	0	0
centr_pathway_DOCK2.xlsx	6.16972e-10	GBM	0.675197	4.10589e-05	GBM	0.641236	1.05455e-06	GBM	0.610496	9.17353e-10	7.18845e-05	2.59686e-06	1	1	0	0
centr_pathway_DOCK4.xlsx	1.90379e-38	GBM	0.840659	2.99906e-09	GBM	0.700016	6.41133e-14	GBM	0.674318	8.77861e-38	8.90037e-09	3.301e-13	1	1	0	0
centr_pathway_DOCK6.xlsx	4.8026e-65	GBM	0.930052	6.30607e-18	GBM	0.781287	0.00047425	GBM	0.611702	1.71653e-63	7.42959e-17	0.000901863	1	1	0	0
centr_pathway_DOCK7.xlsx	4.71532e-06	GBM	0.621243	0.0362812	GBM	0.571705	2.69101e-06	GBM	0.61162	6.11943e-06	0.0460692	6.37434e-06	1	1	0	0
centr_pathway_DOCK9.xlsx	0.80377	LGG	0.511666	0.876251	GBM	0.50759	0.659393	GBM	0.508635	0.811264	0.890604	0.697822	0	0	0	0
centr_pathway_DOHH.xlsx	1.7937e-15	LGG	0.701515	0.0122786	LGG	0.580402	0.90308	GBM	0.503703	3.34304e-15	0.0166503	0.919506	0	0	0	0
centr_pathway_DOK1.xlsx	0.0126327	GBM	0.573586	0.0902606	GBM	0.54617	0.238879	GBM	0.537237	0.0142483	0.108998	0.281714	1	0	0	0
centr_pathway_DOK2.xlsx	2.344e-26	GBM	0.790456	0.000843097	GBM	0.592497	0.00811921	GBM	0.559783	6.3533e-26	0.0013	0.0129632	1	1	0	0
centr_pathway_DOK3.xlsx	9.14872e-36	LGG	0.83953	4.51426e-11	LGG	0.729781	2.67138e-14	LGG	0.679513	3.75706e-35	1.62776e-10	1.43911e-13	1	1	0	0
centr_pathway_DOK4.xlsx	7.46599e-49	LGG	0.892757	2.87399e-16	LGG	0.775555	2.15372e-29	LGG	0.757132	6.41045e-48	2.49997e-15	6.73717e-28	1	1	1	1
centr_pathway_DOK5.xlsx	4.33338e-47	LGG	0.886961	1.77403e-18	LGG	0.782354	1.34546e-25	LGG	0.7362	3.41459e-46	2.35463e-17	2.54884e-24	1	1	1	1
centr_pathway_DOK6.xlsx	6.86353e-54	LGG	0.909441	1.33677e-20	LGG	0.797375	4.66008e-30	LGG	0.761846	8.83976e-53	2.74203e-19	1.64428e-28	1	1	1	1
centr_pathway_DOLK.xlsx	2.95956e-41	GBM	0.888329	2.44921e-14	GBM	0.75081	0.129363	GBM	0.572593	1.59624e-40	1.48388e-13	0.16033	1	0	0	0
centr_pathway_DOLPP1.xlsx	2.05359e-42	GBM	0.89425	7.62851e-20	GBM	0.789074	1.24396e-05	GBM	0.627367	1.15863e-41	1.33338e-18	2.79207e-05	1	1	0	0
centr_pathway_DPAGT1.xlsx	5.56633e-44	GBM	0.913744	6.68377e-18	GBM	0.781208	0.0341781	GBM	0.60202	3.57528e-43	7.84974e-17	0.0488212	1	1	0	0
centr_pathway_DPEP1.xlsx	5.36123e-49	GBM	0.856089	1.07472e-08	GBM	0.684955	2.41524e-10	GBM	0.655226	4.65138e-48	3.00163e-08	8.5626e-10	1	1	0	0
centr_pathway_DPEP2.xlsx	5.36123e-49	GBM	0.856089	1.07472e-08	GBM	0.684955	2.41524e-10	GBM	0.655226	4.65138e-48	3.00163e-08	8.5626e-10	1	1	0	0
centr_pathway_DPF2.xlsx	7.36023e-45	GBM	0.870428	2.79164e-21	GBM	0.81208	1.11179e-33	GBM	0.780105	5.07672e-44	6.61992e-20	1.00942e-31	1	1	1	1
centr_pathway_DPH5.xlsx	1.45351e-15	GBM	0.699997	0.180943	GBM	0.551862	0.316338	LGG	0.504682	2.71784e-15	0.208852	0.363448	0	0	0	0
centr_pathway_DPH6.xlsx	0.00836505	GBM	0.562045	5.30509e-06	LGG	0.639576	0.314489	GBM	0.516132	0.00953271	1.11966e-05	0.362442	0	0	0	0
centr_pathway_DPM1.xlsx	1.52921e-56	GBM	0.929562	2.93389e-18	GBM	0.781999	0.00111648	GBM	0.5927	2.51612e-55	3.7407e-17	0.00203182	1	1	0	0
centr_pathway_DPM2.xlsx	1.24049e-56	GBM	0.927317	8.06628e-19	GBM	0.78441	0.000211624	GBM	0.606643	2.07303e-55	1.13538e-17	0.000420256	1	1	0	0
centr_pathway_DPM3.xlsx	1.52921e-56	GBM	0.929562	2.93389e-18	GBM	0.781999	0.00111648	GBM	0.5927	2.51612e-55	3.7407e-17	0.00203182	1	1	0	0
centr_pathway_DPP4.xlsx	1.312e-34	GBM	0.86837	2.04107e-09	GBM	0.692663	3.6319e-18	GBM	0.74275	5.0939e-34	6.17796e-09	3.15513e-17	1	1	0	0
centr_pathway_DPYD.xlsx	9.69251e-25	GBM	0.7817	3.24634e-15	GBM	0.753656	1.47178e-27	GBM	0.745628	2.47194e-24	2.29121e-14	3.76543e-26	1	1	1	1
centr_pathway_DPYS.xlsx	0.00596268	GBM	0.588828	3.34043e-05	GBM	0.626848	4.23839e-11	GBM	0.670148	0.00686094	5.89964e-05	1.62906e-10	1	1	0	0
centr_pathway_DPYSL2.xlsx	1.4615e-07	LGG	0.633825	0.72377	LGG	0.518262	0.0809693	LGG	0.543383	1.98824e-07	0.751735	0.103506	1	0	0	0
centr_pathway_DPYSL3.xlsx	0.00160429	LGG	0.574427	0.332701	GBM	0.525615	0.909757	GBM	0.506115	0.00189202	0.36859	0.924913	0	0	0	0
centr_pathway_DPYSL4.xlsx	0.00160429	LGG	0.574427	0.332701	GBM	0.525615	0.909757	GBM	0.506115	0.00189202	0.36859	0.924913	0	0	0	0
centr_pathway_DPYSL5.xlsx	0.00160429	LGG	0.574427	0.332701	GBM	0.525615	0.909757	GBM	0.506115	0.00189202	0.36859	0.924913	0	0	0	0
centr_pathway_DRAP1.xlsx	2.55392e-09	LGG	0.664108	0.000205915	LGG	0.601984	0.99101	LGG	0.513268	3.71524e-09	0.000334696	0.994349	1	0	0	0
centr_pathway_DRD1.xlsx	2.40305e-07	LGG	0.623513	5.61393e-06	LGG	0.651356	4.68738e-05	LGG	0.595402	3.25314e-07	1.17916e-05	9.92536e-05	1	1	0	0
centr_pathway_DRD2.xlsx	0.00931489	GBM	0.572771	0.177751	LGG	0.541545	0.0199549	LGG	0.547853	0.010554	0.205454	0.0297604	0	0	0	0
centr_pathway_DRD3.xlsx	0.371801	GBM	0.524412	0.0129643	LGG	0.579888	0.021373	LGG	0.544616	0.389312	0.0175704	0.0316409	0	0	0	0
centr_pathway_DRD4.xlsx	0.60997	LGG	0.515104	0.0105653	LGG	0.582931	0.00822456	LGG	0.553927	0.625374	0.0144082	0.0130977	1	0	0	0
centr_pathway_DRD5.xlsx	0.000160746	LGG	0.588364	0.00216927	LGG	0.596015	0.010387	LGG	0.55632	0.000197431	0.0031928	0.0163111	1	1	0	0
centr_pathway_DROSHA.xlsx	1.75048e-25	GBM	0.784372	7.38206e-07	GBM	0.65187	4.61894e-05	LGG	0.579755	4.60751e-25	1.69337e-06	9.78599e-05	0	1	0	0
centr_pathway_DSCAM.xlsx	7.07168e-34	LGG	0.823925	2.07669e-11	LGG	0.710728	1.5612e-09	LGG	0.642724	2.58315e-33	7.84528e-11	5.13844e-09	1	1	0	0
centr_pathway_DSE.xlsx	0.732057	GBM	0.5176	0.394981	LGG	0.521148	0.000107485	LGG	0.575222	0.743908	0.43225	0.000220387	0	0	0	0
centr_pathway_DSEL.xlsx	0.474289	LGG	0.510224	0.0757978	LGG	0.548462	3.76218e-05	LGG	0.580154	0.491052	0.0924018	8.03252e-05	1	0	0	0
centr_pathway_DSG1.xlsx	0.02009	LGG	0.566674	0.000567194	GBM	0.624318	1.59986e-15	GBM	0.689829	0.0225063	0.000888747	9.97568e-15	0	1	0	0
centr_pathway_DSG2.xlsx	1.09409e-45	GBM	0.872297	7.66293e-11	GBM	0.732983	4.01568e-21	GBM	0.724696	7.98133e-45	2.71477e-10	4.75306e-20	1	1	1	1
centr_pathway_DSG3.xlsx	0.00467666	GBM	0.626449	1.04254e-10	GBM	0.716499	1.59986e-15	GBM	0.689829	0.00540282	3.62744e-10	9.97568e-15	1	1	0	0
centr_pathway_DSN1.xlsx	3.02808e-54	GBM	0.868847	1.37216e-12	GBM	0.73239	1.10602e-17	GBM	0.708504	4.0035e-53	6.15119e-12	8.64045e-17	1	1	1	1
centr_pathway_DSP.xlsx	7.11148e-46	LGG	0.868634	2.50152e-05	LGG	0.63254	0.000101682	LGG	0.585937	5.22862e-45	4.49043e-05	0.000208891	1	1	0	0
centr_pathway_DST.xlsx	0.0295262	LGG	0.561932	0.0177998	GBM	0.592537	1.89089e-05	GBM	0.610986	0.0328055	0.0236801	4.16253e-05	0	1	0	0
centr_pathway_DTX1.xlsx	2.15754e-26	LGG	0.795047	5.21615e-10	LGG	0.700925	6.52867e-18	LGG	0.696746	5.85002e-26	1.66836e-09	5.49841e-17	1	1	0	0
centr_pathway_DTX2.xlsx	6.63932e-12	LGG	0.679688	1.93286e-06	LGG	0.655309	4.21416e-09	LGG	0.621293	1.11226e-11	4.27065e-06	1.32214e-08	1	1	0	0
centr_pathway_DTX3.xlsx	0.0410916	LGG	0.544621	0.129278	GBM	0.550953	0.897808	GBM	0.50015	0.045394	0.152528	0.915139	0	0	0	0
centr_pathway_DTX3L.xlsx	2.80496e-34	GBM	0.79427	4.42921e-08	GBM	0.689659	0.000233453	GBM	0.610179	1.07451e-33	1.16826e-07	0.000461881	1	1	0	0
centr_pathway_DTX4.xlsx	1.50492e-31	LGG	0.823423	5.76243e-21	LGG	0.79781	2.78577e-29	LGG	0.76734	4.94796e-31	1.27321e-19	8.50003e-28	1	1	1	1
centr_pathway_DTYMK.xlsx	2.58993e-103	GBM	0.945582	1.41893e-25	GBM	0.826271	4.92984e-40	GBM	0.796169	9.67338e-100	1.67704e-23	2.15898e-37	1	1	1	1
centr_pathway_DUOX1.xlsx	5.90405e-13	GBM	0.688896	8.62331e-09	GBM	0.69128	4.5503e-14	GBM	0.677047	1.01997e-12	2.43309e-08	2.38738e-13	1	1	0	0
centr_pathway_DUOX2.xlsx	5.90405e-13	GBM	0.688896	8.62331e-09	GBM	0.69128	4.5503e-14	GBM	0.677047	1.01997e-12	2.43309e-08	2.38738e-13	1	1	0	0
centr_pathway_DUSP1.xlsx	1.43705e-30	GBM	0.780759	4.22433e-09	GBM	0.681991	2.53708e-21	GBM	0.715086	4.49528e-30	1.23641e-08	3.06632e-20	1	1	0	0
centr_pathway_DUSP10.xlsx	2.37983e-50	LGG	0.844724	3.75492e-17	LGG	0.779034	1.41328e-16	LGG	0.703972	2.2909e-49	3.85644e-16	9.87967e-16	1	1	1	1
centr_pathway_DUSP14.xlsx	1.3608e-78	GBM	0.926589	1.01419e-24	GBM	0.818444	1.32488e-19	GBM	0.726853	2.60645e-76	8.12008e-23	1.36997e-18	1	1	1	1
centr_pathway_DUSP16.xlsx	1.11637e-29	LGG	0.774173	1.81731e-13	LGG	0.746502	2.21289e-15	LGG	0.704633	3.3667e-29	9.46937e-13	1.36269e-14	1	1	1	1
centr_pathway_DUSP2.xlsx	2.60712e-35	LGG	0.826647	3.61649e-14	LGG	0.743932	7.63655e-19	LGG	0.712321	1.04705e-34	2.12536e-13	7.23335e-18	1	1	1	1
centr_pathway_DUSP3.xlsx	4.84914e-37	LGG	0.815294	2.25616e-14	LGG	0.752115	7.651e-15	LGG	0.69419	2.10355e-36	1.38381e-13	4.41906e-14	1	1	0	0
centr_pathway_DUSP4.xlsx	5.19253e-52	LGG	0.861232	7.57671e-17	LGG	0.77603	1.05743e-17	LGG	0.712094	5.56502e-51	7.29835e-16	8.54785e-17	1	1	1	1
centr_pathway_DUSP5.xlsx	6.2447e-65	LGG	0.880827	4.72055e-20	LGG	0.79615	6.83872e-24	LGG	0.740125	2.2108e-63	8.53136e-19	1.08207e-22	1	1	1	1
centr_pathway_DUSP6.xlsx	3.07526e-52	LGG	0.860856	5.6548e-19	LGG	0.789628	9.81003e-23	LGG	0.734858	3.34871e-51	8.25601e-18	1.38588e-21	1	1	1	1
centr_pathway_DUSP7.xlsx	1.31777e-23	LGG	0.74231	1.72503e-10	LGG	0.710807	1.53707e-11	LGG	0.66566	3.25736e-23	5.84375e-10	6.22606e-11	1	1	0	0
centr_pathway_DUSP8.xlsx	1.91351e-23	LGG	0.754315	5.81104e-13	LGG	0.73073	1.37171e-09	LGG	0.655697	4.68345e-23	2.85466e-12	4.53279e-09	1	1	0	0
centr_pathway_DUSP9.xlsx	0.00044364	LGG	0.551094	2.1135e-09	LGG	0.697051	1.55916e-05	LGG	0.607269	0.000535378	6.37389e-09	3.46713e-05	1	1	0	0
centr_pathway_DUT.xlsx	3.37105e-102	GBM	0.944641	8.61974e-26	GBM	0.824808	1.26381e-32	GBM	0.771937	8.39391e-99	1.21099e-23	8.47666e-31	1	1	1	1
centr_pathway_DVL1.xlsx	0.0279535	GBM	0.566674	0.082637	GBM	0.55791	0.85947	GBM	0.525905	0.0311149	0.10028	0.882221	1	0	0	0
centr_pathway_DVL2.xlsx	0.000378536	GBM	0.618784	0.18196	GBM	0.548937	0.381495	LGG	0.511255	0.000457847	0.209886	0.428973	0	0	0	0
centr_pathway_DVL3.xlsx	3.05668e-07	GBM	0.649054	0.0398897	GBM	0.572812	0.346731	GBM	0.541307	4.1208e-07	0.0503336	0.393388	1	0	0	0
centr_pathway_DYNC1H1.xlsx	1.20297e-30	GBM	0.785877	4.20747e-12	GBM	0.722152	1.42719e-15	GBM	0.679902	3.78207e-30	1.75021e-11	9.05832e-15	1	1	0	0
centr_pathway_DYNC1I1.xlsx	1.52363e-42	GBM	0.822106	7.08413e-05	GBM	0.629022	5.86681e-05	GBM	0.588421	8.68157e-42	0.000120706	0.000123281	1	1	0	0
centr_pathway_DYNC1I2.xlsx	6.11374e-29	GBM	0.779793	3.5956e-11	GBM	0.713416	7.48864e-15	GBM	0.676158	1.79448e-28	1.32342e-10	4.32864e-14	1	1	0	0
centr_pathway_DYNC1LI1.xlsx	1.14925e-32	GBM	0.822946	0.0138359	GBM	0.602617	3.92721e-07	GBM	0.619	3.99856e-32	0.0186297	1.01769e-06	1	1	0	0
centr_pathway_DYNC1LI2.xlsx	4.86928e-47	GBM	0.833835	6.67008e-06	GBM	0.643766	2.19918e-06	GBM	0.604422	3.82477e-46	1.38267e-05	5.24269e-06	1	1	0	0
centr_pathway_DYNC2H1.xlsx	1.56109e-47	GBM	0.834839	4.11897e-06	GBM	0.64677	3.91602e-06	GBM	0.601739	1.26616e-46	8.80305e-06	9.17394e-06	1	1	0	0
centr_pathway_DYNC2LI1.xlsx	9.96255e-41	GBM	0.794495	2.11391e-06	GBM	0.649538	0.000773014	GBM	0.574796	5.22982e-40	4.65686e-06	0.00143552	1	1	0	0
centr_pathway_DYNLL1.xlsx	1.2985e-07	GBM	0.652027	5.53211e-08	GBM	0.677366	1.47395e-08	GBM	0.640068	1.76778e-07	1.4494e-07	4.37891e-08	1	1	0	0
centr_pathway_DYNLL2.xlsx	7.90527e-37	GBM	0.781738	7.812e-06	GBM	0.641988	0.00237818	GBM	0.566573	3.38603e-36	1.60287e-05	0.0040985	1	1	0	0
centr_pathway_DYNLT1.xlsx	0.0126431	LGG	0.563287	0.0248112	LGG	0.587398	3.14739e-07	LGG	0.612554	0.0142579	0.032554	8.23343e-07	1	1	0	0
centr_pathway_DYRK2.xlsx	4.34026e-07	LGG	0.645316	0.0467112	GBM	0.558819	0.364556	GBM	0.520194	5.82183e-07	0.0583773	0.411855	0	0	0	0
centr_pathway_DZIP3.xlsx	3.62125e-34	GBM	0.798585	5.31606e-07	GBM	0.684007	0.00219178	GBM	0.602827	1.33452e-33	1.23621e-06	0.00379131	1	1	0	0
centr_pathway_E2F1.xlsx	4.14106e-41	GBM	0.82819	2.01018e-13	GBM	0.742114	5.80355e-13	GBM	0.676412	2.2143e-40	1.04597e-12	2.69709e-12	1	1	0	0
centr_pathway_E2F2.xlsx	1.90138e-52	GBM	0.855136	5.77754e-18	GBM	0.778125	4.8531e-17	GBM	0.706737	2.11674e-51	6.86117e-17	3.5319e-16	1	1	1	1
centr_pathway_E2F3.xlsx	1.90138e-52	GBM	0.855136	5.77754e-18	GBM	0.778125	4.8531e-17	GBM	0.706737	2.11674e-51	6.86117e-17	3.5319e-16	1	1	1	1
centr_pathway_E2F4.xlsx	2.00676e-31	GBM	0.817841	1.15791e-09	GBM	0.706301	1.34146e-08	GBM	0.638101	6.55466e-31	3.57899e-09	4.00769e-08	1	1	0	0
centr_pathway_E2F5.xlsx	1.59889e-50	GBM	0.881366	2.84226e-13	GBM	0.743181	1.29971e-12	GBM	0.675089	1.54711e-49	1.44955e-12	5.81861e-12	1	1	0	0
centr_pathway_E4F1.xlsx	1.37505e-09	GBM	0.67191	1.85593e-07	GBM	0.665902	0.191132	GBM	0.53469	2.02197e-09	4.60029e-07	0.229143	1	0	0	0
centr_pathway_EARS2.xlsx	0.0192497	LGG	0.547719	0.16057	LGG	0.53775	0.944903	LGG	0.519586	0.021578	0.187164	0.955515	1	0	0	0
centr_pathway_EBI3.xlsx	3.27346e-08	GBM	0.655126	5.39104e-05	GBM	0.646691	4.50436e-13	GBM	0.672496	4.59379e-08	9.31361e-05	2.10912e-12	1	1	0	0
centr_pathway_EBP.xlsx	0.0984895	GBM	0.536028	0.00515607	LGG	0.59728	0.0818264	LGG	0.543474	0.106936	0.00727123	0.104476	0	0	0	0
centr_pathway_ECHDC1.xlsx	8.32023e-23	LGG	0.759609	3.79427e-10	LGG	0.708435	1.7695e-16	LGG	0.701306	1.99654e-22	1.22889e-09	1.22321e-15	1	1	1	1
centr_pathway_ECHS1.xlsx	2.88207e-11	LGG	0.670719	3.06028e-06	LGG	0.661673	1.21014e-10	LGG	0.631882	4.72958e-11	6.62794e-06	4.42292e-10	1	1	0	0
centr_pathway_ECI1.xlsx	0.0173414	GBM	0.566423	0.0394224	LGG	0.558977	0.00576511	LGG	0.55293	0.0194681	0.0497946	0.00939196	0	1	0	0
centr_pathway_ECM1.xlsx	2.99713e-44	GBM	0.853568	2.64066e-12	GBM	0.726105	1.75259e-26	GBM	0.746362	1.96218e-43	1.13263e-11	3.76023e-25	1	1	1	1
centr_pathway_ECM2.xlsx	5.12179e-44	GBM	0.846329	1.13371e-11	GBM	0.720334	7.96825e-26	GBM	0.743271	3.30395e-43	4.41506e-11	1.58196e-24	1	1	1	1
centr_pathway_ECSIT.xlsx	0.424207	LGG	0.525453	0.184369	GBM	0.536762	0.126601	LGG	0.539676	0.44134	0.212345	0.157195	0	0	0	0
centr_pathway_ECT2.xlsx	6.11384e-87	GBM	0.940514	5.97081e-22	GBM	0.79362	6.12795e-14	GBM	0.675134	2.40371e-84	1.71655e-20	3.16823e-13	1	1	0	0
centr_pathway_EDC3.xlsx	6.98381e-35	GBM	0.854195	8.98047e-10	GBM	0.695233	0.849604	LGG	0.519015	2.75008e-34	2.80489e-09	0.873299	0	0	0	0
centr_pathway_EDC4.xlsx	3.04639e-36	GBM	0.854019	4.1831e-10	GBM	0.698593	0.8906	LGG	0.520738	1.2706e-35	1.34837e-09	0.908664	0	0	0	0
centr_pathway_EDIL3.xlsx	4.32254e-06	GBM	0.621883	0.000182171	LGG	0.614238	0.341377	GBM	0.517347	5.61456e-06	0.000297989	0.387904	0	0	0	0
centr_pathway_EDN1.xlsx	3.69885e-32	LGG	0.813601	3.51712e-14	LGG	0.748439	9.13183e-13	LGG	0.681815	1.26109e-31	2.07023e-13	4.14551e-12	1	1	0	0
centr_pathway_EDN2.xlsx	2.00025e-17	GBM	0.716167	0.51169	GBM	0.53273	0.995668	LGG	0.520203	4.03726e-17	0.549631	0.995802	0	0	0	0
centr_pathway_EDN3.xlsx	0.0423218	GBM	0.559536	0.334525	LGG	0.524666	0.238079	LGG	0.512261	0.0467392	0.370501	0.280814	0	0	0	0
centr_pathway_EDNRA.xlsx	1.80685e-23	LGG	0.766897	9.235e-10	LGG	0.697051	6.59643e-09	LGG	0.646033	4.42821e-23	2.88076e-09	2.02684e-08	1	1	0	0
centr_pathway_EDNRB.xlsx	2.33421e-25	LGG	0.772982	1.06026e-10	LGG	0.70887	2.55343e-08	LGG	0.632852	6.11808e-25	3.68224e-10	7.42881e-08	1	1	0	0
centr_pathway_EEA1.xlsx	2.25163e-13	LGG	0.697213	0.00595323	LGG	0.594711	0.0376295	LGG	0.545523	3.93258e-13	0.00832759	0.0532506	1	0	0	0
centr_pathway_EED.xlsx	2.3699e-49	GBM	0.931933	1.22345e-19	GBM	0.804214	9.23493e-06	GBM	0.74542	2.13806e-48	2.04255e-18	2.09744e-05	1	1	1	1
centr_pathway_EEF1A1.xlsx	1.55069e-16	GBM	0.722515	0.588269	GBM	0.50249	0.00263589	LGG	0.559457	2.99087e-16	0.62379	0.0045217	0	0	0	0
centr_pathway_EEF1A2.xlsx	3.12526e-12	GBM	0.688055	0.0251907	LGG	0.565223	1.84153e-05	LGG	0.595991	5.28542e-12	0.0330228	4.06109e-05	0	1	0	0
centr_pathway_EEF1B2.xlsx	2.85803e-05	GBM	0.589856	0.00373121	LGG	0.602973	1.56874e-08	LGG	0.612119	3.61366e-05	0.0053707	4.64939e-08	0	1	0	0
centr_pathway_EEF1D.xlsx	2.85803e-05	GBM	0.589856	0.00373121	LGG	0.602973	1.56874e-08	LGG	0.612119	3.61366e-05	0.0053707	4.64939e-08	0	1	0	0
centr_pathway_EEF1G.xlsx	2.85803e-05	GBM	0.589856	0.00373121	LGG	0.602973	1.56874e-08	LGG	0.612119	3.61366e-05	0.0053707	4.64939e-08	0	1	0	0
centr_pathway_EEF2.xlsx	5.03182e-13	GBM	0.691906	0.629893	GBM	0.502135	0.00258924	LGG	0.560381	8.71094e-13	0.664708	0.00444475	0	0	0	0
centr_pathway_EEF2K.xlsx	1.03167e-54	LGG	0.884502	4.0195e-21	LGG	0.801249	4.49967e-14	LGG	0.682976	1.45347e-53	9.18073e-20	2.36582e-13	1	1	0	0
centr_pathway_EFEMP1.xlsx	3.82147e-49	GBM	0.874065	3.25743e-14	GBM	0.742984	6.10906e-29	GBM	0.759199	3.34659e-48	1.9342e-13	1.80484e-27	1	1	1	1
centr_pathway_EFEMP2.xlsx	3.82147e-49	GBM	0.874065	3.25743e-14	GBM	0.742984	6.10906e-29	GBM	0.759199	3.34659e-48	1.9342e-13	1.80484e-27	1	1	1	1
centr_pathway_EFNA1.xlsx	0.502249	GBM	0.508693	0.107746	LGG	0.554234	1.96073e-05	LGG	0.599481	0.518062	0.12857	4.31246e-05	0	0	0	0
centr_pathway_EFNA2.xlsx	0.238985	LGG	0.519043	0.65479	GBM	0.504862	0.000541712	GBM	0.590987	0.253762	0.687474	0.00102284	0	0	0	0
centr_pathway_EFNA3.xlsx	0.238985	LGG	0.519043	0.65479	GBM	0.504862	0.000541712	GBM	0.590987	0.253762	0.687474	0.00102284	0	0	0	0
centr_pathway_EFNA4.xlsx	0.238985	LGG	0.519043	0.65479	GBM	0.504862	0.000541712	GBM	0.590987	0.253762	0.687474	0.00102284	0	0	0	0
centr_pathway_EFNA5.xlsx	0.293508	GBM	0.537433	0.0368628	GBM	0.567792	2.62952e-07	GBM	0.634058	0.309764	0.0467918	6.92739e-07	1	0	0	0
centr_pathway_EFNB1.xlsx	1.86389e-06	GBM	0.632069	8.88559e-07	GBM	0.672385	3.91689e-07	GBM	0.623913	2.45691e-06	2.02827e-06	1.01536e-06	1	1	0	0
centr_pathway_EFNB2.xlsx	2.37183e-09	GBM	0.665475	9.94951e-08	GBM	0.686853	2.36416e-05	GBM	0.601585	3.45506e-09	2.55374e-07	5.15407e-05	1	1	0	0
centr_pathway_EFNB3.xlsx	2.37183e-09	GBM	0.665475	9.94951e-08	GBM	0.686853	2.36416e-05	GBM	0.601585	3.45506e-09	2.55374e-07	5.15407e-05	1	1	0	0
centr_pathway_EFTUD2.xlsx	4.52967e-08	GBM	0.650835	1.09961e-12	GBM	0.724919	0.318585	GBM	0.549122	6.28001e-08	5.06038e-12	0.363448	1	0	0	0
centr_pathway_EGF.xlsx	0.216907	GBM	0.542451	0.545634	GBM	0.530635	0.0014307	GBM	0.579918	0.230779	0.582897	0.0025654	1	0	0	0
centr_pathway_EGFR.xlsx	2.39519e-25	GBM	0.788888	0.000642149	GBM	0.615227	3.22209e-09	GBM	0.641918	6.26035e-25	0.000998005	1.02559e-08	1	1	0	0
centr_pathway_EGLN1.xlsx	1.86355e-52	GBM	0.879961	4.11451e-14	GBM	0.746265	8.31464e-19	GBM	0.715839	2.08707e-51	2.39536e-13	7.82585e-18	1	1	1	1
centr_pathway_EGLN2.xlsx	1.86355e-52	GBM	0.879961	4.11451e-14	GBM	0.746265	8.31464e-19	GBM	0.715839	2.08707e-51	2.39536e-13	7.82585e-18	1	1	1	1
centr_pathway_EGLN3.xlsx	1.86355e-52	GBM	0.879961	4.11451e-14	GBM	0.746265	8.31464e-19	GBM	0.715839	2.08707e-51	2.39536e-13	7.82585e-18	1	1	1	1
centr_pathway_EGR1.xlsx	2.75444e-16	GBM	0.707901	5.46658e-06	GBM	0.656099	1.09177e-08	GBM	0.64839	5.26367e-16	1.15007e-05	3.29612e-08	1	1	0	0
centr_pathway_EGR4.xlsx	0.377819	GBM	0.520673	0.00401956	GBM	0.59985	5.97563e-06	GBM	0.622136	0.395226	0.00576235	1.38025e-05	1	0	0	0
centr_pathway_EHD1.xlsx	4.83411e-50	LGG	0.894087	2.58153e-13	LGG	0.739189	9.40604e-07	LGG	0.620659	4.58259e-49	1.32201e-12	2.35309e-06	1	1	0	0
centr_pathway_EHD3.xlsx	1.87927e-67	LGG	0.9154	2.66411e-16	LGG	0.773105	8.59177e-14	LGG	0.690863	8.77382e-66	2.32283e-15	4.3455e-13	1	1	0	0
centr_pathway_EHD4.xlsx	0.000260217	LGG	0.599127	7.0235e-10	LGG	0.692901	1.23377e-12	LGG	0.656015	0.000316892	2.21598e-09	5.5434e-12	1	1	0	0
centr_pathway_EHHADH.xlsx	4.38198e-27	LGG	0.776105	5.64517e-17	LGG	0.76255	2.66388e-22	LGG	0.714578	1.2146e-26	5.60452e-16	3.61909e-21	1	1	1	1
centr_pathway_EHMT1.xlsx	2.48717e-62	GBM	0.961852	6.81494e-19	GBM	0.794727	7.62743e-07	GBM	0.698822	7.14582e-61	9.79615e-18	1.92431e-06	1	1	0	0
centr_pathway_EHMT2.xlsx	2.48717e-62	GBM	0.961852	6.81494e-19	GBM	0.794727	7.62743e-07	GBM	0.698822	7.14582e-61	9.79615e-18	1.92431e-06	1	1	0	0
centr_pathway_EIF1.xlsx	0.44287	LGG	0.538825	0.555344	GBM	0.525615	0.534912	LGG	0.512252	0.459795	0.591319	0.580951	0	0	0	0
centr_pathway_EIF1AX.xlsx	2.24841e-13	GBM	0.693637	0.435213	GBM	0.509566	0.00320393	LGG	0.559946	3.92789e-13	0.473287	0.00544718	0	0	0	0
centr_pathway_EIF2A.xlsx	1.45014e-08	LGG	0.663355	5.57731e-06	LGG	0.663807	1.17186e-09	LGG	0.633423	2.05981e-08	1.1718e-05	3.89661e-09	1	1	0	0
centr_pathway_EIF2AK1.xlsx	3.75707e-06	GBM	0.628619	0.0480289	GBM	0.572891	2.83608e-06	GBM	0.618229	4.88347e-06	0.0599636	6.70945e-06	1	0	0	0
centr_pathway_EIF2AK2.xlsx	1.53796e-22	GBM	0.784711	3.25196e-06	GBM	0.662859	2.23427e-19	GBM	0.717081	3.65296e-22	7.02673e-06	2.25701e-18	1	1	0	0
centr_pathway_EIF2AK3.xlsx	2.75329e-12	GBM	0.688218	0.000338512	GBM	0.618666	2.9377e-12	GBM	0.665905	4.66585e-12	0.000541357	1.27603e-11	1	1	0	0
centr_pathway_EIF2AK4.xlsx	3.75707e-06	GBM	0.628619	0.0480289	GBM	0.572891	2.83608e-06	GBM	0.618229	4.88347e-06	0.0599636	6.70945e-06	1	0	0	0
centr_pathway_EIF2B1.xlsx	5.59302e-27	GBM	0.809323	0.000606288	GBM	0.607914	0.21808	LGG	0.510285	1.54283e-26	0.000946023	0.259114	0	0	0	0
centr_pathway_EIF2B2.xlsx	5.59302e-27	GBM	0.809323	0.000606288	GBM	0.607914	0.21808	LGG	0.510285	1.54283e-26	0.000946023	0.259114	0	0	0	0
centr_pathway_EIF2B3.xlsx	5.59302e-27	GBM	0.809323	0.000606288	GBM	0.607914	0.21808	LGG	0.510285	1.54283e-26	0.000946023	0.259114	0	0	0	0
centr_pathway_EIF2B4.xlsx	5.59302e-27	GBM	0.809323	0.000606288	GBM	0.607914	0.21808	LGG	0.510285	1.54283e-26	0.000946023	0.259114	0	0	0	0
centr_pathway_EIF2B5.xlsx	5.59302e-27	GBM	0.809323	0.000606288	GBM	0.607914	0.21808	LGG	0.510285	1.54283e-26	0.000946023	0.259114	0	0	0	0
centr_pathway_EIF2S1.xlsx	5.54756e-18	GBM	0.730543	0.127536	GBM	0.539015	0.00567395	LGG	0.55748	1.14129e-17	0.150616	0.00925357	0	0	0	0
centr_pathway_EIF2S2.xlsx	1.74854e-16	GBM	0.719341	0.0839544	GBM	0.547593	0.00685064	LGG	0.555287	3.36552e-16	0.101746	0.0110205	0	0	0	0
centr_pathway_EIF2S3.xlsx	1.74854e-16	GBM	0.719341	0.0839544	GBM	0.547593	0.00685064	LGG	0.555287	3.36552e-16	0.101746	0.0110205	0	0	0	0
centr_pathway_EIF3A.xlsx	1.58073e-33	GBM	0.831414	3.63037e-05	GBM	0.630129	0.0958323	LGG	0.526821	5.6797e-33	6.39502e-05	0.121236	0	0	0	0
centr_pathway_EIF3B.xlsx	6.11619e-18	GBM	0.729477	0.168844	GBM	0.532928	0.00403916	LGG	0.560907	1.25275e-17	0.195797	0.00675159	0	0	0	0
[truncated: 5,495 more rows]

## Sheet: genesLGG_vs_GBM
	p_value_TCGA	direction_TCGA	AUC_TCGA	p_value_CGGA_325	direction_CGGA_325	AUC_CGGA_325	p_value_CGGA_693	direction_CGGA_693	AUC_CGGA_693	q_TCGA	q_CGGA_325	q_CGGA_693	direction	q	auc	all
A1BG	1.39199e-07	GBM	0.642029	2.56183e-06	GBM	0.665112	0.0049123	GBM	0.569656	2.21436e-07	7.49224e-06	0.00929126	1	1	0	0
A1BG-AS1	0.00751183	GBM	0.583835	5.80714e-06	GBM	0.642936	3.69567e-06	GBM	0.611929	0.00922543	1.60407e-05	1.18573e-05	1	1	0	0
A2M	1.65327e-18	GBM	0.738308	1.43136e-05	GBM	0.654083	0.000126018	GBM	0.613696	4.26559e-18	3.71676e-05	0.0003195	1	1	0	0
A2M-AS1	0.0144897	GBM	0.556124	0.00953865	GBM	0.551071	0.00167682	GBM	0.566478	0.0174492	0.0158059	0.00347748	1	1	0	0
A2ML1	1.50812e-12	LGG	0.691668	4.37109e-10	LGG	0.70215	2.85221e-14	LGG	0.690264	2.9984e-12	2.29676e-09	2.55731e-13	1	1	0	0
A2MP1	7.43724e-34	LGG	0.859501	0.857615	GBM	0.615345	0.32386	LGG	0.544281	4.08366e-33	0.881273	0.395222	0	0	0	0
A3GALT2	0.000377859	GBM	0.613955	0.529253	LGG	0.502609	0.135485	GBM	0.571759	0.000501756	0.584587	0.184589	0	0	0	0
A4GALT	0.404172	LGG	0.524311	0.0251218	GBM	0.568424	0.0920048	GBM	0.537056	0.428108	0.0383559	0.131487	0	0	0	0
AAAS	1.78149e-06	GBM	0.60624	0.00854612	GBM	0.572535	0.65647	GBM	0.509623	2.6767e-06	0.0142828	0.715778	1	0	0	0
AACS	0.653889	LGG	0.531813	0.190294	LGG	0.516681	0.281441	LGG	0.518553	0.674443	0.237895	0.35053	1	0	0	0
AACSP1	2.66216e-05	LGG	0.602821	0.710978	GBM	0.525812	0.125662	LGG	0.538425	3.77228e-05	0.752697	0.172693	0	0	0	0
AADAT	1.84688e-16	LGG	0.725789	7.65251e-09	LGG	0.693731	2.14852e-07	LGG	0.632825	4.34012e-16	3.30118e-08	8.17028e-07	1	1	0	0
AAED1	2.19033e-38	GBM	0.857632	1.2016e-13	GBM	0.73907	7.68666e-27	GBM	0.743661	1.5516e-37	1.17642e-12	3.77242e-25	1	1	1	1
AAGAB	3.24487e-36	GBM	0.829269	4.42569e-08	GBM	0.689422	2.82276e-05	GBM	0.647883	2.02123e-35	1.69535e-07	7.93067e-05	1	1	0	0
AAK1	1.39646e-36	LGG	0.842591	0.884639	LGG	0.511898	1.54772e-06	LGG	0.603307	8.89954e-36	0.904133	5.234e-06	1	0	0	0
AAMDC	2.89581e-05	LGG	0.607093	0.329618	LGG	0.545419	0.0228692	LGG	0.535841	4.0935e-05	0.386566	0.0376556	1	0	0	0
AAMP	1.0542e-16	LGG	0.717798	0.324852	GBM	0.509566	0.378197	LGG	0.518906	2.5057e-16	0.381633	0.452126	0	0	0	0
AANAT	0.524099	GBM	0.513636	0.0114555	LGG	0.578741	0.00227784	LGG	0.562485	0.547742	0.0187299	0.0045985	0	0	0	0
AAR2	1.30343e-07	GBM	0.636096	0.000150737	GBM	0.628113	6.69368e-08	GBM	0.632734	2.07611e-07	0.000337071	2.72939e-07	1	1	0	0
AARD	8.66129e-10	LGG	0.676652	0.00211168	LGG	0.61661	0.336506	LGG	0.571328	1.52562e-09	0.00392371	0.408712	1	0	0	0
AARS	2.70641e-59	LGG	0.929362	9.20564e-14	LGG	0.755949	4.32841e-06	LGG	0.61395	6.45625e-58	9.20552e-13	1.37579e-05	1	1	0	0
AARS2	2.28047e-09	LGG	0.693236	0.454527	LGG	0.504506	0.0393504	GBM	0.551887	3.93675e-09	0.512336	0.0614248	0	0	0	0
AARSD1	0.000137833	LGG	0.609978	0.311597	LGG	0.549411	0.000605794	LGG	0.570598	0.000187614	0.367964	0.00136429	1	0	0	0
AASDH	7.35605e-07	LGG	0.705592	0.0377649	LGG	0.62329	0.925202	GBM	0.536874	1.12644e-06	0.0556084	0.940868	0	0	0	0
AASDHPPT	5.44368e-20	LGG	0.742937	2.62304e-14	LGG	0.742272	0.00532338	LGG	0.578631	1.50176e-19	2.90816e-13	0.00999198	1	1	0	0
AASS	6.5477e-09	LGG	0.66476	0.350721	LGG	0.526405	0.734179	GBM	0.514129	1.10683e-08	0.408571	0.783531	0	0	0	0
AATF	2.03523e-21	LGG	0.76188	0.000413565	GBM	0.618073	0.0570942	LGG	0.504682	5.98099e-21	0.000862016	0.0858764	0	0	0	0
AATK	1.2826e-42	LGG	0.873037	7.75287e-14	LGG	0.745039	3.18338e-11	LGG	0.654111	1.16952e-41	7.89206e-13	1.99929e-10	1	1	0	0
ABAT	1.92608e-36	LGG	0.875119	4.4555e-18	LGG	0.788165	7.77493e-14	LGG	0.675415	1.21737e-35	1.04277e-16	6.61611e-13	1	1	0	0
ABCA1	0.172439	LGG	0.544533	0.496674	GBM	0.524587	4.54941e-05	GBM	0.591477	0.190278	0.553363	0.000123736	0	0	0	0
ABCA10	0.275845	GBM	0.545449	0.0535605	GBM	0.550241	0.0269117	GBM	0.566093	0.297828	0.0762929	0.0436266	1	0	0	0
ABCA11P	2.87775e-06	LGG	0.63178	0.000141956	LGG	0.618349	0.0187186	LGG	0.561596	4.28158e-06	0.000318681	0.031405	1	1	0	0
ABCA12	5.49015e-07	GBM	0.644827	0.788678	LGG	0.542217	0.0416595	GBM	0.583517	8.47003e-07	0.821806	0.0646476	0	0	0	0
ABCA13	8.02831e-20	GBM	0.751129	4.57297e-06	GBM	0.650921	1.29809e-12	GBM	0.712702	2.19931e-19	1.28337e-05	9.68348e-12	1	1	0	0
ABCA17P	8.34551e-27	LGG	0.782089	1.14864e-10	LGG	0.706617	4.75147e-24	LGG	0.720544	3.17576e-26	6.60516e-10	1.44394e-22	1	1	1	1
ABCA2	4.71579e-38	LGG	0.840634	1.46709e-05	LGG	0.657641	0.000953989	LGG	0.577053	3.27618e-37	3.80452e-05	0.00207716	1	1	0	0
ABCA3	1.36829e-38	LGG	0.916792	1.64908e-13	LGG	0.743498	5.10257e-22	LGG	0.744595	9.81886e-38	1.57587e-12	1.17865e-20	1	1	1	1
ABCA4	0.0107154	GBM	0.591324	0.985635	GBM	0.531149	0.0316633	GBM	0.577216	0.0130203	0.98876	0.0505341	1	0	0	0
ABCA5	2.31173e-09	GBM	0.659604	0.00204529	GBM	0.601945	3.48393e-11	GBM	0.651228	3.98914e-09	0.00380675	2.17035e-10	1	1	0	0
ABCA6	0.0632417	LGG	0.557717	0.198488	GBM	0.539766	0.000927392	GBM	0.575385	0.0726732	0.24697	0.00202447	0	0	0	0
ABCA7	0.965337	LGG	0.500903	0.0126066	GBM	0.577635	0.697747	GBM	0.523131	0.967948	0.0204516	0.752586	0	0	0	0
ABCA8	0.00439021	LGG	0.570676	0.697209	LGG	0.518737	0.00865429	GBM	0.564497	0.00546508	0.740732	0.0155932	0	0	0	0
ABCA9	3.36939e-11	LGG	0.721248	0.000438997	LGG	0.639695	0.486158	LGG	0.541987	6.3122e-11	0.000911485	0.558251	1	0	0	0
ABCB1	3.28964e-27	LGG	0.807793	1.08378e-08	LGG	0.693889	1.13668e-10	LGG	0.655471	1.28025e-26	4.55657e-08	6.61799e-10	1	1	0	0
ABCB10	1.70219e-06	GBM	0.637563	0.338833	LGG	0.519725	0.607886	GBM	0.526531	2.56083e-06	0.39614	0.671734	0	0	0	0
ABCB4	1.35997e-24	GBM	0.772078	1.63487e-08	GBM	0.684639	5.40997e-12	GBM	0.671843	4.64184e-24	6.69867e-08	3.73824e-11	1	1	0	0
ABCB6	1.0034e-09	LGG	0.65485	0.189514	LGG	0.574512	0.000705555	LGG	0.567888	1.76355e-09	0.237053	0.00157296	1	0	0	0
ABCB7	9.57759e-15	GBM	0.698542	0.0335743	GBM	0.56708	0.000496312	GBM	0.578023	2.09249e-14	0.049982	0.00113212	1	1	0	0
ABCB8	2.55993e-10	GBM	0.690313	0.127422	GBM	0.557989	0.0825654	GBM	0.562077	4.61928e-10	0.166044	0.119536	1	0	0	0
ABCB9	8.145e-09	GBM	0.653733	0.0146181	GBM	0.576607	0.347412	GBM	0.521889	1.3695e-08	0.0234231	0.420373	1	0	0	0
ABCC1	0.000237332	GBM	0.639834	2.13134e-12	GBM	0.73654	1.32543e-09	GBM	0.654881	0.000318869	1.66293e-11	6.72857e-09	1	1	0	0
ABCC10	3.5137e-06	LGG	0.616903	0.0770378	GBM	0.565776	0.785094	LGG	0.507683	5.20539e-06	0.10569	0.825883	0	0	0	0
ABCC11	1.35593e-19	LGG	0.759847	2.17766e-05	LGG	0.642067	0.00954946	LGG	0.581695	3.67853e-19	5.49987e-05	0.0170501	1	1	0	0
ABCC12	0.00178572	LGG	0.568731	0.000167327	LGG	0.615385	0.040943	LGG	0.587506	0.0022795	0.000371403	0.063703	1	0	0	0
ABCC2	0.00188072	LGG	0.605487	0.350141	LGG	0.557791	0.211029	LGG	0.518045	0.00239662	0.408094	0.272527	1	0	0	0
ABCC3	3.06148e-82	GBM	0.912953	5.36641e-19	GBM	0.78437	1.22632e-34	GBM	0.795371	2.34975e-80	1.53701e-17	2.01174e-32	1	1	1	1
ABCC4	0.0124011	LGG	0.571993	3.68517e-05	LGG	0.629971	0.00962226	LGG	0.568323	0.0150108	9.00182e-05	0.0171576	1	1	0	0
ABCC5	2.92008e-18	LGG	0.742072	0.147362	LGG	0.565974	1.8165e-07	LGG	0.628392	7.44917e-18	0.189244	6.97203e-07	1	0	0	0
ABCC6	6.82927e-10	LGG	0.675598	0.662015	GBM	0.517037	0.0652578	LGG	0.543302	1.20956e-09	0.709167	0.0967434	0	0	0	0
ABCC6P1	2.68732e-06	GBM	0.625797	0.0726274	GBM	0.527749	0.953588	LGG	0.502461	4.00635e-06	0.100268	0.964091	0	0	0	0
ABCC6P2	0.180242	GBM	0.53806	0.43663	LGG	0.542889	0.00127077	LGG	0.586105	0.198417	0.494741	0.00270343	0	0	0	0
ABCC8	4.0227e-38	LGG	0.848186	1.56642e-19	LGG	0.774923	4.94961e-31	LGG	0.754177	2.80794e-37	5.02235e-18	4.3412e-29	1	1	1	1
ABCC9	2.53879e-13	LGG	0.698091	1.69887e-05	LGG	0.649458	0.102749	LGG	0.542812	5.21921e-13	4.36595e-05	0.144983	1	0	0	0
ABCD1	2.76563e-24	GBM	0.767688	6.51096e-14	GBM	0.751364	1.66795e-08	GBM	0.644864	9.29229e-24	6.73801e-13	7.37118e-08	1	1	0	0
ABCD2	0.000443849	GBM	0.59214	0.00830491	LGG	0.598071	0.269474	GBM	0.521508	0.000587131	0.0139111	0.337715	0	0	0	0
ABCD3	4.15118e-11	GBM	0.659592	0.41695	GBM	0.542691	0.00663696	GBM	0.562947	7.74557e-11	0.475453	0.0122181	1	0	0	0
ABCD4	0.377058	GBM	0.521313	0.0509424	LGG	0.563839	0.14751	LGG	0.541788	0.400735	0.0728918	0.198936	0	0	0	0
ABCE1	2.40739e-12	GBM	0.681406	0.969018	LGG	0.533955	0.0536236	GBM	0.529957	4.74622e-12	0.97551	0.0811106	0	0	0	0
ABCF1	3.01465e-08	LGG	0.646269	0.00460938	GBM	0.597162	0.0992321	LGG	0.510593	4.93395e-08	0.00807519	0.140648	0	0	0	0
ABCF2	2.65662e-26	GBM	0.791874	0.00819943	GBM	0.607163	0.00101399	GBM	0.579156	9.9044e-26	0.0137513	0.00219406	1	1	0	0
ABCF3	3.80953e-17	LGG	0.755645	0.0455296	GBM	0.567239	0.873762	LGG	0.501546	9.22111e-17	0.0658166	0.899346	0	0	0	0
ABCG1	2.36395e-21	LGG	0.751418	0.000304552	LGG	0.620286	0.000174079	LGG	0.590887	6.92972e-21	0.000648295	0.000431169	1	1	0	0
ABCG2	1.83051e-11	LGG	0.685672	6.59285e-13	LGG	0.736145	4.45846e-12	LGG	0.649215	3.4735e-11	5.66467e-12	3.11723e-11	1	1	0	0
ABCG4	1.69434e-06	LGG	0.592453	1.05698e-05	LGG	0.619021	0.00392235	LGG	0.570861	2.54923e-06	2.80252e-05	0.00756955	1	1	0	0
ABCG5	4.05617e-08	LGG	0.642487	0.00240848	LGG	0.601747	0.0204843	LGG	0.572013	6.59881e-08	0.0044283	0.0340707	1	1	0	0
ABCG8	4.76657e-11	LGG	0.646432	0.00233766	LGG	0.60906	0.00855585	LGG	0.574061	8.86942e-11	0.00430613	0.01543	1	1	0	0
ABHD1	0.106863	LGG	0.549563	0.000833958	LGG	0.611432	0.00158157	LGG	0.570444	0.120194	0.00165031	0.00329966	1	0	0	0
ABHD10	4.49145e-05	LGG	0.653809	1.1792e-11	LGG	0.725472	3.94247e-14	LGG	0.695178	6.28468e-05	8.0976e-11	3.47743e-13	1	1	0	0
ABHD11	1.04228e-17	GBM	0.736339	0.000539278	GBM	0.617282	0.345954	GBM	0.536639	2.59218e-17	0.0011029	0.41878	1	0	0	0
ABHD12	0.482907	LGG	0.510864	3.30015e-06	LGG	0.651237	0.00141992	LGG	0.570263	0.506763	9.47782e-06	0.00299163	1	0	0	0
ABHD12B	0.817477	GBM	0.505758	0.00182023	LGG	0.611195	0.131726	LGG	0.543628	0.829125	0.0034191	0.180007	0	0	0	0
ABHD13	3.0265e-07	GBM	0.659604	0.41029	LGG	0.556447	0.921848	LGG	0.507756	4.73096e-07	0.468582	0.938158	0	0	0	0
ABHD14A	2.45667e-09	LGG	0.668423	3.80496e-10	LGG	0.706538	3.3902e-11	LGG	0.643386	4.23595e-09	2.01653e-09	2.11867e-10	1	1	0	0
ABHD14A-ACY1	0.104243	LGG	0.548133	2.92092e-14	LGG	0.738043	2.3631e-09	LGG	0.646627	0.117382	3.2103e-13	1.15943e-08	1	0	0	0
ABHD14B	1.54326e-09	GBM	0.662753	0.00259899	GBM	0.594632	0.472676	GBM	0.528262	2.68936e-09	0.00475145	0.544996	1	0	0	0
ABHD15	4.46678e-25	GBM	0.760989	6.01073e-08	GBM	0.683572	8.48395e-16	GBM	0.698831	1.56421e-24	2.26386e-07	9.1989e-15	1	1	0	0
ABHD16A	0.0612892	GBM	0.562371	0.000317573	GBM	0.603486	0.331323	GBM	0.525706	0.0705397	0.00067382	0.403135	1	0	0	0
ABHD16B	#NUM!	GBM	0.5	0.487496	GBM	0.515416	0.508437	GBM	0.518099	#NUM!	0.544335	0.579329	1	0	0	0
ABHD17A	3.87199e-34	GBM	0.828466	0.982757	LGG	0.503558	0.862237	LGG	0.504002	2.15351e-33	0.986488	0.889333	0	0	0	0
ABHD17B	7.41501e-13	LGG	0.682811	4.32395e-13	LGG	0.745395	0.000401667	LGG	0.597487	1.49682e-12	3.84962e-12	0.000932922	1	1	0	0
ABHD17C	0.0489871	LGG	0.570977	1.30166e-05	LGG	0.673215	0.00082643	LGG	0.573735	0.0567434	3.4034e-05	0.00181841	1	0	0	0
ABHD2	4.41099e-09	LGG	0.647185	0.0355419	LGG	0.548304	0.723842	GBM	0.506115	7.51541e-09	0.0526458	0.774742	0	0	0	0
ABHD3	2.32314e-11	GBM	0.673616	0.28138	LGG	0.536564	2.8127e-05	GBM	0.584532	4.38754e-11	0.33668	7.90616e-05	0	0	0	0
ABHD4	0.400638	LGG	0.51755	0.000114989	LGG	0.638944	9.14088e-05	LGG	0.58417	0.424619	0.000261455	0.000237636	1	0	0	0
ABHD5	1.61825e-11	GBM	0.66821	0.535427	GBM	0.531425	0.0526112	GBM	0.544426	3.07735e-11	0.590413	0.0797563	1	0	0	0
ABHD6	1.41492e-40	LGG	0.864883	4.74529e-16	LGG	0.767215	1.22184e-24	LGG	0.739917	1.14366e-39	7.32975e-15	4.0844e-23	1	1	1	1
ABHD8	0.0408909	GBM	0.550228	0.00416741	LGG	0.586568	0.10043	LGG	0.531236	0.0476404	0.0073518	0.142095	0	0	0	0
ABI1	1.81107e-55	LGG	0.877942	2.4322e-15	LGG	0.757333	3.52993e-16	LGG	0.686312	3.46755e-54	3.30708e-14	4.07159e-15	1	1	0	0
ABI2	1.32597e-46	LGG	0.885067	1.02621e-12	LGG	0.735078	1.6055e-05	LGG	0.593562	1.51113e-45	8.55189e-12	4.67993e-05	1	1	0	0
ABI3	2.19726e-28	GBM	0.765932	2.81863e-07	GBM	0.677129	1.54387e-09	GBM	0.638935	9.10734e-28	9.51376e-07	7.76848e-09	1	1	0	0
ABI3BP	6.5584e-21	LGG	0.754654	2.27119e-05	LGG	0.643569	0.000123616	LGG	0.585185	1.88713e-20	5.72386e-05	0.000313769	1	1	0	0
ABL1	2.14584e-14	LGG	0.730707	0.972676	GBM	0.511384	0.384424	GBM	0.508934	4.6162e-14	0.978475	0.458272	0	0	0	0
ABL2	2.70993e-44	LGG	0.897135	0.123537	LGG	0.599138	0.665816	LGG	0.585031	2.72738e-43	0.161623	0.724142	1	0	0	0
ABLIM1	1.76427e-66	LGG	0.956884	1.22891e-19	LGG	0.787809	2.19454e-27	LGG	0.761439	6.31736e-65	4.02451e-18	1.1782e-25	1	1	1	1
ABLIM2	1.04566e-18	LGG	0.709381	1.35432e-07	LGG	0.675666	1.19426e-07	LGG	0.634384	2.71776e-18	4.82203e-07	4.70611e-07	1	1	0	0
ABLIM3	1.58921e-43	LGG	0.861596	3.73925e-13	LGG	0.733299	1.40095e-22	LGG	0.721967	1.52469e-42	3.3697e-12	3.49094e-21	1	1	1	1
ABO	2.83211e-08	LGG	0.641515	0.0790043	LGG	0.565025	0.0260383	LGG	0.590561	4.63949e-08	0.108149	0.042354	1	0	0	0
ABR	1.79755e-40	LGG	0.854973	2.78957e-09	LGG	0.699739	5.22674e-11	LGG	0.655135	1.44632e-39	1.28806e-08	3.19208e-10	1	1	0	0
ABRACL	5.9966e-67	GBM	0.919564	8.23341e-14	GBM	0.736422	3.45644e-15	GBM	0.726772	2.19622e-65	8.32599e-13	3.48536e-14	1	1	1	1
ABT1	2.48887e-18	GBM	0.76139	1.55863e-11	GBM	0.724563	2.54443e-07	GBM	0.619952	6.36938e-18	1.04918e-10	9.5853e-07	1	1	0	0
ABTB1	0.468777	GBM	0.521376	0.247326	GBM	0.544549	0.909137	LGG	0.502597	0.492607	0.300417	0.928528	0	0	0	0
ABTB2	3.45902e-19	LGG	0.718074	4.44144e-10	LGG	0.702783	2.5591e-06	LGG	0.59212	9.19055e-19	2.32808e-09	8.38938e-06	1	1	0	0
ACAA1	0.21088	GBM	0.536354	0.41856	GBM	0.52684	0.627134	GBM	0.509315	0.230677	0.477104	0.689039	1	0	0	0
ACAA2	1.39301e-58	GBM	0.880037	2.167e-06	GBM	0.670646	2.07998e-14	GBM	0.688324	3.1936e-57	6.40412e-06	1.89661e-13	1	1	0	0
ACACA	1.37452e-46	LGG	0.887438	3.48449e-12	LGG	0.743418	1.76037e-10	LGG	0.657175	1.56444e-45	2.60374e-11	9.99569e-10	1	1	0	0
ACACB	0.048371	LGG	0.550241	0.234091	LGG	0.546525	0.0388073	GBM	0.558079	0.0560445	0.285791	0.0606518	0	0	0	0
ACAD10	4.61013e-06	LGG	0.615949	0.348958	LGG	0.547869	0.0256349	LGG	0.550844	6.78811e-06	0.406889	0.0417784	1	0	0	0
ACAD11	5.40172e-21	LGG	0.763623	0.202797	GBM	0.536367	0.805009	LGG	0.505263	1.5622e-20	0.251713	0.842962	0	0	0	0
ACAD8	0.00593039	LGG	0.562196	0.0127373	LGG	0.574156	0.00274205	LGG	0.577262	0.00732451	0.0206334	0.00544569	1	1	0	0
ACAD9	0.748478	GBM	0.518102	0.190515	GBM	0.545023	0.982015	GBM	0.511128	0.764009	0.238154	0.985854	1	0	0	0
ACADL	2.34512e-06	GBM	0.622723	0.544304	GBM	0.515416	1.36055e-06	GBM	0.613841	3.50597e-06	0.598654	4.63286e-06	1	0	0	0
ACADM	3.00451e-07	GBM	0.601924	0.0663664	GBM	0.558028	0.235488	GBM	0.506051	4.69785e-07	0.09246	0.29981	1	0	0	0
ACADS	2.55215e-34	GBM	0.787433	3.0827e-05	GBM	0.643213	5.05237e-06	GBM	0.622599	1.43253e-33	7.61307e-05	1.58626e-05	1	1	0	0
ACADSB	2.50309e-76	LGG	0.924106	1.0857e-22	LGG	0.80702	1.98445e-21	LGG	0.708568	1.47783e-74	7.57299e-21	4.12658e-20	1	1	1	1
ACADVL	0.0310481	GBM	0.559285	7.26274e-09	GBM	0.694561	0.228242	GBM	0.524119	0.0365151	3.14376e-08	0.291694	1	0	0	0
ACAN	0.691733	GBM	0.507063	0.683918	GBM	0.528224	0.441838	GBM	0.537019	0.710861	0.728928	0.515173	1	0	0	0
ACAP1	0.222867	LGG	0.538336	1.33284e-06	GBM	0.64685	2.61538e-05	GBM	0.612065	0.243171	4.06506e-06	7.3808e-05	0	0	0	0
ACAP2	1.0875e-25	LGG	0.766233	1.03312e-15	LGG	0.756423	0.0855495	LGG	0.548007	3.9283e-25	1.49807e-14	0.123211	1	0	0	0
ACAP2-IT1	1.59015e-27	LGG	0.784642	3.95033e-10	LGG	0.706103	7.968e-05	LGG	0.581944	6.29252e-27	2.08608e-09	0.000208923	1	1	0	0
ACAP3	6.20192e-12	LGG	0.689862	0.000902427	LGG	0.608783	8.7865e-10	LGG	0.64306	1.20165e-11	0.00177746	4.56914e-09	1	1	0	0
ACAT1	2.16776e-19	LGG	0.745283	9.29667e-10	LGG	0.711084	1.79068e-07	LGG	0.617649	5.81749e-19	4.62666e-09	6.89085e-07	1	1	0	0
ACAT2	0.0236314	LGG	0.544709	1.95529e-08	LGG	0.684955	3.99322e-10	LGG	0.6416	0.0280395	7.89289e-08	2.16288e-09	1	1	0	0
ACBD3	0.901928	GBM	0.506373	0.0173813	GBM	0.605581	0.0174546	GBM	0.544644	0.908256	0.0273972	0.0295191	1	0	0	0
ACBD4	5.29907e-16	LGG	0.720972	1.50299e-08	LGG	0.686181	1.75356e-10	LGG	0.640567	1.2236e-15	6.1941e-08	9.96084e-10	1	1	0	0
ACBD5	1.78136e-80	LGG	0.943274	8.29144e-24	LGG	0.826389	5.25487e-20	LGG	0.702639	1.26799e-78	8.20667e-22	9.22702e-19	1	1	1	1
ACBD6	0.240299	GBM	0.52608	0.0878609	GBM	0.557752	0.0675598	LGG	0.532913	0.261143	0.118858	0.0998463	0	0	0	0
ACBD7	3.74766e-31	LGG	0.787533	2.16707e-17	LGG	0.751482	2.15762e-10	LGG	0.645725	1.78274e-30	4.40803e-16	1.21008e-09	1	1	0	0
ACCS	2.05827e-26	GBM	0.755331	9.92066e-06	GBM	0.654518	7.40942e-07	GBM	0.61288	7.71271e-26	2.6399e-05	2.61395e-06	1	1	0	0
ACD	4.30609e-07	LGG	0.617956	0.504653	LGG	0.526524	0.000131979	LGG	0.573055	6.67798e-07	0.561089	0.000333847	1	0	0	0
ACE2	0.117661	LGG	0.539239	0.0163148	LGG	0.623409	0.88614	LGG	0.514827	0.131919	0.025882	0.90955	1	0	0	0
ACER2	0.135957	GBM	0.515743	0.551788	LGG	0.538659	0.907401	GBM	0.519568	0.151527	0.605665	0.927076	0	0	0	0
ACER3	1.30303e-07	LGG	0.646031	0.000619449	LGG	0.607558	0.0748376	LGG	0.551261	2.07566e-07	0.00125455	0.109533	1	0	0	0
ACHE	0.154877	LGG	0.543642	0.668016	LGG	0.514705	0.690488	LGG	0.505362	0.171736	0.714602	0.746074	1	0	0	0
ACIN1	4.57429e-19	LGG	0.768842	0.0064253	GBM	0.575421	0.524163	LGG	0.516332	1.20739e-18	0.0109903	0.594224	0	0	0	0
ACKR2	1.93356e-08	LGG	0.655991	5.65699e-06	LGG	0.659736	5.35435e-09	LGG	0.655181	3.19599e-08	1.56504e-05	2.5116e-08	1	1	0	0
ACKR3	1.64906e-11	GBM	0.670029	0.458082	LGG	0.529923	9.46311e-05	GBM	0.592338	3.13457e-11	0.515717	0.000245186	0	0	0	0
ACKR4	0.339266	LGG	0.524976	0.0691243	LGG	0.571784	0.16525	LGG	0.538189	0.362622	0.0959176	0.219949	1	0	0	0
ACLY	0.0133708	GBM	0.576522	0.000366838	GBM	0.622065	0.0157045	GBM	0.558097	0.0161524	0.000771208	0.0268257	1	1	0	0
ACMSD	8.96294e-09	GBM	0.653884	0.837191	GBM	0.518539	0.0133624	GBM	0.561936	1.5043e-08	0.864168	0.0231736	1	0	0	0
ACO1	1.15059e-10	LGG	0.67043	0.126891	LGG	0.579809	0.00219291	LGG	0.563772	2.10611e-10	0.165425	0.00444377	1	0	0	0
ACO2	1.76086e-37	LGG	0.847509	3.83921e-17	LGG	0.759032	4.5184e-15	LGG	0.681752	1.17923e-36	7.4338e-16	4.47971e-14	1	1	0	0
ACOT1	1.3853e-15	GBM	0.726655	0.000425605	LGG	0.625267	0.0311328	LGG	0.56049	3.14448e-15	0.000885548	0.0497771	0	1	0	0
ACOT11	2.83202e-13	GBM	0.663556	0.000567511	GBM	0.605147	0.0118626	GBM	0.567172	5.81322e-13	0.00115637	0.0207822	1	1	0	0
ACOT12	3.99948e-40	GBM	0.858115	0.000752576	GBM	0.608309	2.14169e-06	GBM	0.654573	3.14489e-39	0.00150016	7.08974e-06	1	1	0	0
ACOT13	0.569693	LGG	0.52884	0.033907	GBM	0.551229	0.365779	GBM	0.544843	0.591994	0.0504265	0.439476	0	0	0	0
ACOT2	2.71563e-12	GBM	0.691379	0.0177593	LGG	0.621156	0.0927758	LGG	0.564742	5.34021e-12	0.0279309	0.132469	0	0	0	0
ACOT4	4.98218e-11	GBM	0.66752	0.150553	LGG	0.531307	0.00476799	GBM	0.586436	9.26086e-11	0.192951	0.00904728	0	0	0	0
ACOT6	0.0667839	LGG	0.550065	0.000428114	LGG	0.622638	0.063357	LGG	0.535904	0.0765444	0.000890456	0.094272	1	0	0	0
ACOT7	0.0438729	LGG	0.53944	0.706137	LGG	0.523717	0.0750966	LGG	0.542423	0.05097	0.748288	0.109868	1	0	0	0
ACOT8	0.00361782	GBM	0.584099	0.463771	LGG	0.533679	0.0632195	LGG	0.51315	0.00452882	0.521062	0.094091	0	0	0	0
ACOT9	3.64917e-60	GBM	0.905878	1.46873e-11	GBM	0.758005	1.32212e-27	GBM	0.762581	9.13741e-59	9.94326e-11	7.27453e-26	1	1	1	1
ACOX1	1.88696e-25	LGG	0.801194	0.00057968	LGG	0.596687	0.000176888	LGG	0.579646	6.74576e-25	0.0011798	0.000437699	1	1	0	0
ACOX2	3.7409e-07	GBM	0.650371	0.0166845	GBM	0.578583	7.27918e-05	GBM	0.586472	5.81936e-07	0.0263904	0.00019177	1	1	0	0
ACOX3	4.64364e-10	LGG	0.67403	0.375715	GBM	0.515614	0.00171974	LGG	0.558913	8.27938e-10	0.434116	0.00355776	0	0	0	0
ACOXL	7.78326e-10	LGG	0.670869	0.066827	LGG	0.583722	0.477766	LGG	0.509025	1.37412e-09	0.093043	0.550113	1	0	0	0
ACP1	2.85568e-28	GBM	0.825192	0.092965	GBM	0.553245	0.0573995	GBM	0.568559	1.17646e-27	0.125185	0.0863063	1	0	0	0
ACP2	1.89523e-21	GBM	0.777134	1.21828e-06	GBM	0.671753	2.20076e-09	GBM	0.648699	5.57514e-21	3.73431e-06	1.08248e-08	1	1	0	0
ACP5	2.46806e-28	GBM	0.795399	1.06012e-07	GBM	0.664638	7.93231e-15	GBM	0.699647	1.02011e-27	3.82762e-07	7.63371e-14	1	1	0	0
ACP6	1.22399e-07	GBM	0.635581	1.55778e-05	GBM	0.656495	3.74904e-08	GBM	0.617694	1.95098e-07	4.0232e-05	1.5751e-07	1	1	0	0
ACPP	2.09256e-26	GBM	0.781305	0.00223774	GBM	0.587714	2.15439e-10	GBM	0.65606	7.83288e-26	0.00413841	1.20904e-09	1	1	0	0
ACR	1.66535e-13	LGG	0.69922	0.357674	GBM	0.535082	0.00301434	LGG	0.5766	3.45052e-13	0.415644	0.00594314	0	0	0	0
ACRBP	6.02357e-07	GBM	0.631203	0.135178	GBM	0.554273	0.411188	LGG	0.501319	9.26994e-07	0.174993	0.485151	0	0	0	0
ACRV1	0.176899	GBM	0.525227	0.0457889	LGG	0.551723	0.751066	GBM	0.513612	0.194943	0.0661321	0.798382	0	0	0	0
ACSBG1	2.18853e-13	LGG	0.708001	2.62356e-08	LGG	0.678235	0.00483381	LGG	0.557462	4.51808e-13	1.03939e-07	0.00915844	1	1	0	0
ACSBG2	0.0101003	LGG	0.57003	0.951385	LGG	0.503973	0.101753	LGG	0.538923	0.0122975	0.961095	0.143772	1	0	0	0
ACSF2	6.44322e-06	GBM	0.623927	0.00215703	GBM	0.613487	0.120364	GBM	0.541951	9.41885e-06	0.00400295	0.16625	1	0	0	0
ACSF3	5.51168e-15	LGG	0.700549	0.423778	GBM	0.503716	0.000857197	LGG	0.551887	1.21835e-14	0.482059	0.0018812	0	0	0	0
ACSL1	5.86942e-05	GBM	0.612487	0.000628848	GBM	0.603605	7.9053e-12	GBM	0.650956	8.15978e-05	0.00127126	5.36827e-11	1	1	0	0
ACSL3	0.00345039	LGG	0.584237	0.810815	GBM	0.502886	9.88223e-05	GBM	0.594704	0.00432536	0.841941	0.000254889	0	0	0	0
ACSL4	1.522e-08	LGG	0.665011	0.00159662	LGG	0.593446	0.00410937	LGG	0.581396	2.52779e-08	0.003027	0.00788965	1	1	0	0
ACSL5	0.961786	LGG	0.514577	0.764112	GBM	0.507866	0.187414	GBM	0.524663	0.964463	0.800057	0.245756	0	0	0	0
ACSL6	1.52864e-41	LGG	0.8662	3.03368e-23	LGG	0.801803	7.85891e-22	LGG	0.717924	1.31122e-40	2.53527e-21	1.75582e-20	1	1	1	1
ACSM1	6.63839e-05	LGG	0.60412	0.177671	LGG	0.52437	0.0982173	LGG	0.551769	9.19984e-05	0.22374	0.139354	1	0	0	0
ACSM3	4.61892e-21	GBM	0.772931	0.169251	GBM	0.550597	0.0689899	GBM	0.55322	1.33888e-20	0.214386	0.101714	1	0	0	0
ACSM5	1.20622e-13	LGG	0.689535	8.95865e-05	LGG	0.616175	0.000355274	LGG	0.564461	2.51368e-13	0.000206829	0.000831711	1	1	0	0
ACSS1	1.26007e-28	LGG	0.800492	1.05563e-07	LGG	0.679145	7.04583e-07	LGG	0.618936	5.28237e-28	3.81217e-07	2.49662e-06	1	1	0	0
ACSS2	0.663052	LGG	0.50833	0.679769	LGG	0.519409	0.968985	LGG	0.500376	0.683216	0.725204	0.975427	1	0	0	0
ACSS3	1.65731e-21	GBM	0.76612	1.59233e-06	GBM	0.665547	1.17315e-20	GBM	0.719555	4.88749e-21	4.80273e-06	2.20879e-19	1	1	0	0
ACTA1	2.90684e-27	GBM	0.787119	0.243215	GBM	0.515179	0.234806	LGG	0.532895	1.13477e-26	0.295848	0.299049	0	0	0	0
ACTA2	9.47523e-37	GBM	0.838878	1.33585e-16	GBM	0.769784	1.03926e-25	GBM	0.737496	6.09571e-36	2.29779e-15	4.15634e-24	1	1	1	1
ACTA2-AS1	1.79435e-10	GBM	0.669414	2.45102e-08	GBM	0.669658	1.25842e-08	GBM	0.649605	3.25646e-10	9.73432e-08	5.63157e-08	1	1	0	0
ACTB	8.54251e-52	GBM	0.893083	1.03327e-15	GBM	0.756186	0.00146308	GBM	0.594468	1.32747e-50	1.49807e-14	0.00307381	1	1	0	0
ACTBP7	1.39084e-230	GBM	0.999448	0.27564	GBM	0.523777	0.623997	LGG	0.504193	2.45524e-226	0.330548	0.686072	0	0	0	0
ACTC1	5.40397e-05	GBM	0.579557	0.0659016	GBM	0.556487	0.790894	GBM	0.52935	7.52931e-05	0.0918996	0.830504	1	0	0	0
ACTG1	4.72775e-36	GBM	0.83933	2.98332e-09	GBM	0.707843	8.53025e-13	GBM	0.669359	2.92121e-35	1.37109e-08	6.51143e-12	1	1	0	0
ACTG1P1	1.55908e-18	GBM	0.710999	0.000389562	LGG	0.606886	0.0232789	LGG	0.545731	4.02668e-18	0.00081621	0.0382661	0	1	0	0
ACTG1P10	5.55139e-10	LGG	0.673742	8.11169e-11	LGG	0.692663	0.498697	LGG	0.511731	9.85803e-10	4.77775e-10	0.570264	1	0	0	0
ACTG1P3	9.63089e-21	GBM	0.718363	0.132335	GBM	0.550281	0.488388	GBM	0.532482	2.75104e-20	0.171713	0.56034	1	0	0	0
ACTG1P4	#NUM!	GBM	0.5	0.587238	LGG	0.53692	0.00265664	LGG	0.523362	#NUM!	0.639583	0.00529148	0	0	0	0
ACTG2	6.132e-52	GBM	0.870327	4.1904e-13	GBM	0.748241	1.06988e-22	GBM	0.743108	9.56256e-51	3.74956e-12	2.69917e-21	1	1	1	1
ACTL10	4.50756e-47	GBM	0.861094	0.0172143	GBM	0.587912	1.63411e-11	GBM	0.699947	5.26618e-46	0.0271653	1.06871e-10	1	1	0	0
ACTL6A	1.32643e-53	GBM	0.927668	5.69632e-16	GBM	0.7701	1.60887e-14	GBM	0.684036	2.26456e-52	8.70765e-15	1.49473e-13	1	1	0	0
ACTL6B	1.77317e-25	LGG	0.788148	8.09352e-13	LGG	0.730216	9.88423e-22	LGG	0.715004	6.34409e-25	6.85435e-12	2.16463e-20	1	1	1	1
ACTL8	0.0653759	LGG	0.548008	0.815116	GBM	0.511819	0.219587	GBM	0.504193	0.0750085	0.845664	0.281982	0	0	0	0
ACTN1	1.85792e-60	GBM	0.879485	1.18862e-22	GBM	0.795083	7.0585e-38	GBM	0.779443	4.73958e-59	8.1941e-21	1.83905e-35	1	1	1	1
ACTN2	2.04019e-12	LGG	0.698354	0.0586822	LGG	0.566369	0.510953	LGG	0.52188	4.03444e-12	0.0828358	0.581747	1	0	0	0
ACTN3	1.19917e-05	LGG	0.626424	0.165504	LGG	0.524073	0.280987	LGG	0.503286	1.73019e-05	0.210166	0.350063	1	0	0	0
ACTN4	3.62655e-23	GBM	0.782791	5.54454e-19	GBM	0.777729	1.17114e-23	GBM	0.726935	1.15371e-22	1.58185e-17	3.37932e-22	1	1	1	1
ACTR10	0.0554665	GBM	0.56044	0.0549469	LGG	0.566092	0.0503094	LGG	0.542341	0.0639967	0.0780281	0.0765881	0	0	0	0
ACTR1A	1.29172e-42	LGG	0.850143	3.76619e-09	LGG	0.686813	2.70498e-12	LGG	0.657665	1.17722e-41	1.70828e-08	1.93789e-11	1	1	0	0
ACTR1B	0.271588	GBM	0.52948	4.34825e-05	LGG	0.644873	6.14925e-05	LGG	0.607332	0.293573	0.000105219	0.000163928	0	0	0	0
ACTR2	0.562175	GBM	0.517763	0.411781	GBM	0.558028	0.0100383	GBM	0.545314	0.584663	0.470103	0.0178438	1	0	0	0
ACTR3	3.7682e-48	GBM	0.897448	6.75123e-09	GBM	0.724484	1.2848e-07	GBM	0.613887	4.69443e-47	2.93958e-08	5.04159e-07	1	1	0	0
ACTR3B	0.111712	LGG	0.521351	0.00188619	LGG	0.593644	0.0465129	LGG	0.552023	0.125457	0.00353475	0.0713294	1	0	0	0
ACTR3C	9.01497e-11	GBM	0.668561	0.259595	GBM	0.550834	0.18706	GBM	0.537509	1.65634e-10	0.313471	0.245383	1	0	0	0
ACTR5	0.135266	GBM	0.528928	0.0869893	GBM	0.538975	0.509543	LGG	0.507266	0.150824	0.117873	0.580328	0	0	0	0
ACTR6	1.81666e-16	LGG	0.751104	4.61681e-12	LGG	0.732232	5.74044e-05	LGG	0.605129	4.26967e-16	3.39482e-11	0.000153584	1	1	0	0
ACTR8	0.00111648	LGG	0.591726	0.144914	LGG	0.538541	0.846099	GBM	0.530374	0.00144326	0.186371	0.876679	0	0	0	0
ACTRT3	0.00121837	LGG	0.604471	0.0610392	LGG	0.582457	0.151294	GBM	0.515693	0.00157072	0.0858075	0.203528	0	0	0	0
ACVR1	0.00108511	GBM	0.591738	0.17154	GBM	0.54949	0.0622838	GBM	0.53566	0.00140374	0.216914	0.092842	1	0	0	0
ACVR1B	3.33276e-23	LGG	0.757263	0.00398113	LGG	0.60653	0.610824	LGG	0.523303	1.06216e-22	0.00705337	0.674183	1	0	0	0
ACVR1C	3.90191e-31	LGG	0.799952	1.71732e-11	LGG	0.746541	2.94354e-05	LGG	0.65266	1.85512e-30	1.14684e-10	8.253e-05	1	1	0	0
ACVR2A	2.17443e-12	LGG	0.699571	0.309618	LGG	0.568503	0.391236	GBM	0.506187	4.29572e-12	0.365921	0.465383	0	0	0	0
ACVR2B	2.08251e-56	LGG	0.91062	3.3028e-14	LGG	0.757728	1.62865e-10	LGG	0.67275	4.18231e-55	3.58992e-13	9.296e-10	1	1	0	0
ACVR2B-AS1	4.02393e-14	LGG	0.716744	0.000663514	LGG	0.641553	0.000260467	LGG	0.607613	8.546e-14	0.00133509	0.000624789	1	1	0	0
ACVRL1	5.18461e-22	GBM	0.765467	1.58112e-15	GBM	0.76093	1.50871e-07	GBM	0.639307	1.56719e-21	2.21269e-14	5.8618e-07	1	1	0	0
ACY1	0.0010234	GBM	0.578115	0.829858	LGG	0.512175	0.0100253	LGG	0.54128	0.00132556	0.857945	0.0178242	0	0	0	0
ACY3	3.18688e-09	LGG	0.668711	2.10703e-06	LGG	0.647304	1.86236e-15	LGG	0.660584	5.46248e-09	6.24146e-06	1.93635e-14	1	1	0	0
ACYP1	1.26408e-05	GBM	0.606729	0.759312	LGG	0.503637	0.834286	LGG	0.50005	1.82162e-05	0.795878	0.866923	0	0	0	0
ACYP2	0.910238	LGG	0.522618	6.4222e-05	LGG	0.629971	0.00558485	LGG	0.567525	0.916259	0.000151588	0.0104242	1	0	0	0
ADA	3.24766e-07	GBM	0.633537	9.76859e-05	GBM	0.637205	0.0776409	GBM	0.536675	5.06636e-07	0.000224562	0.113169	1	0	0	0
ADAD2	0.000609063	LGG	0.574715	0.458498	LGG	0.52601	0.0979015	LGG	0.552277	0.000799866	0.516035	0.138984	1	0	0	0
ADAL	0.000484431	LGG	0.589543	2.85791e-05	LGG	0.648154	2.57051e-05	LGG	0.621121	0.00063952	7.09851e-05	7.2669e-05	1	1	0	0
ADAM10	0.26588	LGG	0.526632	0.347013	GBM	0.557712	0.207784	GBM	0.522959	0.287615	0.404848	0.268885	0	0	0	0
ADAM11	4.35224e-15	LGG	0.682147	8.48012e-11	LGG	0.726935	2.86913e-12	LGG	0.675134	9.6666e-15	4.97656e-10	2.04887e-11	1	1	0	0
ADAM12	4.89991e-83	GBM	0.931494	4.03628e-22	GBM	0.81295	1.24223e-31	GBM	0.799142	3.89632e-81	2.32178e-20	1.20266e-29	1	1	1	1
ADAM15	3.5434e-11	GBM	0.685483	0.000664304	GBM	0.644399	0.192147	GBM	0.534962	6.63327e-11	0.00133638	0.251182	1	0	0	0
ADAM17	4.24673e-07	GBM	0.624216	0.0301124	GBM	0.590402	0.0077734	GBM	0.558142	6.58939e-07	0.0451967	0.0141354	1	1	0	0
ADAM19	3.1968e-23	GBM	0.786919	3.50081e-14	GBM	0.770654	8.6518e-19	GBM	0.719492	1.01975e-22	3.78887e-13	1.31349e-17	1	1	1	1
ADAM1A	#NUM!	GBM	0.5	0.233495	LGG	0.555617	2.02398e-05	LGG	0.601322	#NUM!	0.285122	5.80711e-05	0	0	0	0
ADAM1B	8.78202e-32	LGG	0.825625	1.89241e-17	LGG	0.761681	6.09124e-11	LGG	0.656527	4.31715e-31	3.91223e-16	3.68636e-10	1	1	0	0
ADAM20	2.28922e-09	LGG	0.669063	0.00640714	LGG	0.586252	0.582254	LGG	0.550772	3.95146e-09	0.0109633	0.648343	1	0	0	0
ADAM20P1	2.33478e-05	LGG	0.621895	0.257885	GBM	0.526326	0.0126475	LGG	0.569465	3.31746e-05	0.311703	0.0220461	0	0	0	0
ADAM21	0.000449119	GBM	0.594034	0.010712	LGG	0.570045	0.515287	GBM	0.514691	0.00059388	0.0175872	0.586003	0	0	0	0
ADAM22	6.02877e-76	LGG	0.940664	1.97975e-24	LGG	0.81793	4.63932e-30	LGG	0.76007	3.48937e-74	2.56616e-22	3.52767e-28	1	1	1	1
ADAM23	0.00936852	LGG	0.5528	0.64343	LGG	0.508301	0.640102	GBM	0.516622	0.0114349	0.691894	0.700525	0	0	0	0
ADAM28	0.109982	GBM	0.532214	0.639053	GBM	0.510752	0.155304	GBM	0.525415	0.123632	0.687991	0.208291	1	0	0	0
ADAM29	4.79775e-39	LGG	0.824113	0.000430823	LGG	0.679402	8.87241e-14	LGG	0.723309	3.54223e-38	0.000895775	7.48536e-13	1	1	0	0
ADAM32	0.000155215	GBM	0.606704	1.58454e-05	GBM	0.647087	1.72519e-06	GBM	0.628541	0.000210705	4.08873e-05	5.79433e-06	1	1	0	0
ADAM33	2.04549e-36	GBM	0.837912	0.00097364	GBM	0.568662	7.84771e-09	GBM	0.633351	1.29145e-35	0.00190755	3.60575e-08	1	1	0	0
ADAM8	5.3199e-17	GBM	0.727934	2.77483e-08	GBM	0.662661	0.00035572	GBM	0.550935	1.2819e-16	1.09638e-07	0.000832645	1	1	0	0
ADAM9	9.16268e-28	GBM	0.805773	1.13368e-06	GBM	0.690055	3.681e-14	GBM	0.664455	3.68953e-27	3.49252e-06	3.25756e-13	1	1	0	0
ADAMDEC1	3.90546e-54	GBM	0.861245	3.95207e-08	GBM	0.705787	3.81507e-17	GBM	0.746544	6.88054e-53	1.52381e-07	4.8662e-16	1	1	1	1
ADAMTS1	7.26529e-22	GBM	0.757401	2.94865e-10	GBM	0.710768	3.3809e-18	GBM	0.706963	2.18008e-21	1.5903e-09	4.79195e-17	1	1	1	1
ADAMTS10	0.00378737	LGG	0.582405	0.0857086	GBM	0.550755	0.0367821	LGG	0.544961	0.0047345	0.116262	0.0578592	0	0	0	0
ADAMTS12	0.00344478	GBM	0.562459	0.0988317	GBM	0.536643	0.00359586	GBM	0.551787	0.00431864	0.132261	0.00698857	1	0	0	0
ADAMTS13	5.11841e-35	LGG	0.847132	0.000190894	LGG	0.660131	1.06336e-08	LGG	0.621611	2.99785e-34	0.000418937	4.80848e-08	1	1	0	0
ADAMTS14	5.35284e-19	GBM	0.730907	8.90156e-12	GBM	0.722271	1.13887e-16	GBM	0.701714	1.40783e-18	6.24837e-11	1.38106e-15	1	1	1	1
ADAMTS15	0.000152479	GBM	0.596191	0.00583614	GBM	0.61072	4.12682e-06	GBM	0.617758	0.000207087	0.0100592	1.31478e-05	1	1	0	0
ADAMTS16	0.000191491	LGG	0.598412	0.824036	LGG	0.514507	0.379324	GBM	0.523648	0.000258559	0.85292	0.453321	0	0	0	0
ADAMTS17	5.58842e-14	LGG	0.729327	0.0560596	LGG	0.600403	0.00412556	LGG	0.607242	1.18062e-13	0.0794375	0.00791687	1	0	0	0
ADAMTS18	1.04757e-42	GBM	0.794872	0.0478706	GBM	0.573168	0.000776915	GBM	0.629126	9.61162e-42	0.0688357	0.00172036	1	0	0	0
ADAMTS19	3.35553e-24	LGG	0.779429	8.32868e-07	LGG	0.724662	0.000599708	LGG	0.668697	1.12145e-23	2.61537e-06	0.00135144	1	1	0	0
ADAMTS19-AS1	1.08331e-32	LGG	0.787634	0.000109994	LGG	0.680647	3.20112e-08	LGG	0.647919	5.58355e-32	0.000250775	1.35324e-07	1	1	0	0
ADAMTS2	1.16486e-17	GBM	0.735348	5.76439e-05	GBM	0.604949	0.00768207	GBM	0.572765	2.88728e-17	0.000137047	0.0139866	1	1	0	0
ADAMTS20	1.26103e-45	LGG	0.813224	8.0503e-08	LGG	0.676852	1.53353e-10	LGG	0.660067	1.36069e-44	2.96893e-07	8.77853e-10	1	1	0	0
ADAMTS3	7.03398e-32	GBM	0.815206	0.0275691	GBM	0.577318	1.3112e-09	GBM	0.680845	3.48207e-31	0.0417472	6.66203e-09	1	1	0	0
ADAMTS4	1.05535e-05	GBM	0.602414	0.00173815	GBM	0.606016	8.95137e-07	GBM	0.611502	1.52719e-05	0.00327396	3.12434e-06	1	1	0	0
ADAMTS5	4.65479e-09	LGG	0.68369	4.06149e-05	LGG	0.652305	1.61473e-05	LGG	0.607912	7.92468e-09	9.86936e-05	4.7022e-05	1	1	0	0
ADAMTS6	1.09212e-11	LGG	0.682661	2.67113e-05	LGG	0.63839	0.142793	LGG	0.549244	2.0951e-11	6.66072e-05	0.19334	1	0	0	0
ADAMTS7	1.52033e-33	GBM	0.822633	3.72266e-17	GBM	0.785359	7.60778e-13	GBM	0.685614	8.22252e-33	7.22392e-16	5.84252e-12	1	1	0	0
ADAMTS8	8.35919e-21	LGG	0.752697	5.99579e-05	LGG	0.626255	3.38616e-05	LGG	0.597424	2.39476e-20	0.000142224	9.39733e-05	1	1	0	0
ADAMTS9	1.96715e-10	GBM	0.65569	0.00774292	GBM	0.586687	0.00118317	GBM	0.569683	3.56458e-10	0.0130537	0.00253074	1	1	0	0
ADAMTS9-AS1	3.36441e-08	GBM	0.663919	0.267503	LGG	0.509685	0.489837	GBM	0.505761	5.49061e-08	0.321776	0.561529	0	0	0	0
ADAMTS9-AS2	2.7947e-24	GBM	0.762294	0.000194183	GBM	0.616709	2.50016e-07	GBM	0.638373	9.38282e-24	0.000425469	9.43057e-07	1	1	0	0
ADAMTSL1	0.852339	LGG	0.500464	0.0933577	GBM	0.532888	0.000226251	GBM	0.570218	0.861958	0.125655	0.000549109	0	0	0	0
ADAMTSL2	1.44923e-26	LGG	0.803226	0.00745852	LGG	0.572101	1.39747e-06	LGG	0.599282	5.45603e-26	0.0126102	4.7522e-06	1	1	0	0
ADAMTSL3	1.01521e-23	LGG	0.761566	4.22311e-05	LGG	0.637916	0.00650749	LGG	0.589342	3.31144e-23	0.000102396	0.011996	1	1	0	0
ADAMTSL4	2.56226e-37	GBM	0.837172	2.6753e-12	GBM	0.724366	1.27505e-20	GBM	0.729908	1.703e-36	2.04568e-11	2.39556e-19	1	1	1	1
ADAMTSL4-AS1	0.00851046	GBM	0.577513	0.562384	GBM	0.552059	0.00418964	GBM	0.565893	0.0104113	0.615693	0.00802811	1	0	0	0
ADAMTSL5	6.13753e-06	LGG	0.640248	0.0628139	LGG	0.566764	0.487554	LGG	0.508789	8.98092e-06	0.0881065	0.559601	1	0	0	0
ADAP1	1.1046e-26	LGG	0.7783	2.28031e-10	LGG	0.708594	2.35773e-08	LGG	0.638273	4.17639e-26	1.25194e-09	1.01734e-07	1	1	0	0
ADAP2	6.62448e-24	GBM	0.75567	7.33723e-07	GBM	0.664677	4.50445e-09	GBM	0.628383	2.1785e-23	2.32173e-06	2.12814e-08	1	1	0	0
ADAR	2.92305e-07	LGG	0.651952	0.0832773	LGG	0.552573	0.873973	GBM	0.502933	4.57533e-07	0.11325	0.899406	0	0	0	0
ADARB1	5.79055e-24	LGG	0.760512	0.729284	GBM	0.540359	0.284676	LGG	0.51751	1.91102e-23	0.768634	0.354036	0	0	0	0
ADARB2	5.77635e-59	LGG	0.910871	5.60349e-19	LGG	0.778718	2.22823e-18	LGG	0.716101	1.34703e-57	1.59609e-17	3.22792e-17	1	1	1	1
ADARB2-AS1	2.52594e-11	LGG	0.672995	0.000196554	LGG	0.675488	0.0177404	LGG	0.598067	4.7624e-11	0.000430079	0.0299454	1	1	0	0
ADAT1	0.0277576	GBM	0.571529	0.119725	GBM	0.56799	0.00151618	GBM	0.585031	0.0327631	0.15703	0.00317445	1	0	0	0
ADAT2	0.150097	GBM	0.537634	0.218268	GBM	0.536327	0.770738	GBM	0.511781	0.166603	0.268582	0.814456	1	0	0	0
ADAT3	7.88535e-35	GBM	0.77682	0.150141	GBM	0.551032	0.000105201	GBM	0.598802	4.56394e-34	0.192533	0.000269967	1	0	0	0
ADCK1	5.18285e-27	LGG	0.778351	2.40514e-16	LGG	0.758874	4.48867e-16	LGG	0.675433	1.99505e-26	3.95653e-15	5.06577e-15	1	1	0	0
ADCK2	1.55678e-21	GBM	0.765053	0.372212	GBM	0.530437	0.18242	GBM	0.533475	4.59639e-21	0.430505	0.240007	1	0	0	0
ADCK5	0.0251008	LGG	0.554669	0.0150337	GBM	0.572298	0.00579019	LGG	0.543012	0.0297246	0.0240325	0.010774	0	1	0	0
ADCY1	3.54673e-10	LGG	0.644977	0.00486275	LGG	0.590165	0.00641332	LGG	0.558088	6.35897e-10	0.00848635	0.0118408	1	1	0	0
ADCY10	0.448179	GBM	0.523508	0.319778	LGG	0.502174	0.161858	GBM	0.573019	0.472059	0.376395	0.215953	0	0	0	0
ADCY10P1	2.08094e-29	LGG	0.826773	0.000689299	LGG	0.626492	0.0442911	LGG	0.555858	9.07481e-29	0.00138305	0.0682175	1	0	0	0
ADCY2	4.75138e-31	LGG	0.848838	1.59207e-17	LGG	0.778678	8.83495e-19	LGG	0.69729	2.2511e-30	3.35795e-16	1.34014e-17	1	1	0	0
ADCY3	0.121433	GBM	0.545888	5.89042e-07	GBM	0.673176	2.91443e-08	GBM	0.625518	0.135923	1.88956e-06	1.23944e-07	1	0	0	0
ADCY4	0.083163	GBM	0.550918	0.05992	GBM	0.547869	0.562152	LGG	0.517293	0.0945256	0.0844271	0.630118	0	0	0	0
ADCY5	3.6671e-43	LGG	0.897712	9.90151e-19	LGG	0.786189	1.12705e-18	LGG	0.710907	3.45071e-42	2.66603e-17	1.68081e-17	1	1	1	1
ADCY6	0.475124	LGG	0.522304	0.298989	GBM	0.545814	0.461098	LGG	0.511119	0.498862	0.355134	0.533905	0	0	0	0
ADCY7	1.97011e-11	LGG	0.681795	0.146191	LGG	0.548383	0.771708	LGG	0.544906	3.73318e-11	0.187863	0.815335	1	0	0	0
ADCY8	5.09513e-11	LGG	0.695193	1.01223e-06	LGG	0.654479	1.91433e-12	LGG	0.654482	9.46484e-11	3.13963e-06	1.40207e-11	1	1	0	0
ADCY9	9.94339e-05	LGG	0.593733	0.404959	GBM	0.530714	0.830899	GBM	0.510593	0.000136536	0.46345	0.863961	0	0	0	0
ADCYAP1	3.32038e-09	GBM	0.641904	0.48653	LGG	0.525852	0.716914	LGG	0.527845	5.68522e-09	0.543394	0.768926	0	0	0	0
ADCYAP1R1	7.14919e-36	LGG	0.852075	1.72548e-21	LGG	0.798364	5.31714e-31	LGG	0.766706	4.37603e-35	8.83533e-20	4.61783e-29	1	1	1	1
ADD1	1.27538e-56	LGG	0.907108	0.0314603	LGG	0.615938	1.05207e-05	LGG	0.594749	2.58784e-55	0.0470723	3.15602e-05	1	1	0	0
ADD2	5.26539e-20	LGG	0.78742	2.44664e-07	LGG	0.670923	4.24157e-08	LGG	0.632526	1.45393e-19	8.32959e-07	1.77194e-07	1	1	0	0
ADD3	1.54362e-41	LGG	0.862161	5.83024e-20	LGG	0.787374	1.65737e-13	LGG	0.669722	1.32344e-40	2.04543e-18	1.36195e-12	1	1	0	0
ADH1B	1.20848e-22	LGG	0.776281	2.04855e-12	LGG	0.767689	0.00714709	LGG	0.641301	3.75982e-22	1.6031e-11	0.013077	1	1	0	0
ADH1C	0.0238117	GBM	0.563149	0.132652	GBM	0.515772	0.999964	GBM	0.507039	0.0282473	0.172087	0.999964	1	0	0	0
ADH5	2.12223e-35	GBM	0.858447	0.133566	GBM	0.554392	2.73622e-09	GBM	0.627322	1.26438e-34	0.173146	1.33107e-08	1	0	0	0
ADHFE1	7.46498e-48	LGG	0.888002	1.07216e-20	LGG	0.796861	3.95166e-29	LGG	0.754259	9.13231e-47	4.37683e-19	2.66524e-27	1	1	1	1
ADI1	1.32087e-08	GBM	0.657296	0.458497	GBM	0.518341	0.10366	LGG	0.535904	2.20099e-08	0.516035	0.146024	0	0	0	0
ADIG	1.54611e-12	GBM	0.690922	0.827082	GBM	0.523243	0.00215841	GBM	0.580698	3.0722e-12	0.855574	0.00437936	1	0	0	0
ADIPOR1	5.55332e-14	GBM	0.750878	4.00121e-06	GBM	0.644755	1.8993e-07	GBM	0.607885	1.17334e-13	1.13423e-05	7.27882e-07	1	1	0	0
ADIPOR2	5.80341e-61	LGG	0.883675	1.00544e-10	LGG	0.708515	5.26436e-07	LGG	0.629226	1.52225e-59	5.84047e-10	1.89995e-06	1	1	0	0
ADIRF	0.00368903	LGG	0.508806	2.57383e-06	LGG	0.659301	1.8072e-08	LGG	0.625105	0.00461501	7.51741e-06	7.94099e-08	1	1	0	0
ADIRF-AS1	1.37167e-20	GBM	0.744832	0.00275208	GBM	0.609772	5.54877e-10	GBM	0.644447	3.89481e-20	0.00500294	2.95395e-09	1	1	0	0
ADK	5.7236e-06	LGG	0.638441	6.37279e-08	LGG	0.694482	4.9453e-08	LGG	0.636252	8.38704e-06	2.38956e-07	2.04901e-07	1	1	0	0
ADM	3.48256e-68	GBM	0.923202	3.74748e-20	GBM	0.79615	4.61529e-46	GBM	0.837535	1.38152e-66	1.38321e-18	5.84065e-43	1	1	1	1
ADM2	7.98814e-23	GBM	0.776456	7.37882e-06	GBM	0.675488	7.99573e-11	GBM	0.720689	2.50114e-22	2.00784e-05	4.76811e-10	1	1	0	0
ADM5	0.000543781	GBM	0.603919	5.43145e-06	GBM	0.654755	0.983307	LGG	0.508708	0.000715783	1.50593e-05	0.986983	0	0	0	0
ADNP	0.0046122	LGG	0.595878	0.468599	LGG	0.527631	0.531279	LGG	0.515208	0.00573536	0.525853	0.600719	1	0	0	0
ADNP2	0.00242	GBM	0.562698	0.0156071	LGG	0.559609	0.305115	GBM	0.5146	0.00306414	0.0248728	0.375594	0	0	0	0
ADO	4.58065e-38	LGG	0.855424	2.31531e-13	LGG	0.72231	3.36205e-15	LGG	0.682042	3.18857e-37	2.15556e-12	3.39792e-14	1	1	0	0
ADORA1	1.4459e-07	GBM	0.64785	0.34449	GBM	0.544509	3.44836e-05	GBM	0.608067	2.29846e-07	0.402196	9.55647e-05	1	0	0	0
ADORA2A	1.73061e-16	LGG	0.729515	0.451831	LGG	0.521385	0.000113916	LGG	0.605102	4.07557e-16	0.509586	0.000290857	1	0	0	0
ADORA2A-AS1	5.64661e-20	LGG	0.762105	0.00493819	LGG	0.591904	0.129171	LGG	0.541063	1.55676e-19	0.00860612	0.176829	1	0	0	0
ADORA2B	2.07323e-21	GBM	0.746638	0.0127485	GBM	0.604791	3.59141e-06	GBM	0.611339	6.08863e-21	0.0206495	1.15437e-05	1	1	0	0
ADPGK	3.87822e-53	GBM	0.920731	3.41993e-15	GBM	0.763064	1.41613e-10	GBM	0.682613	6.42837e-52	4.51497e-14	8.15126e-10	1	1	0	0
ADPGK-AS1	0.736855	LGG	0.510776	0.861976	GBM	0.539371	0.0101343	GBM	0.553954	0.753196	0.885055	0.0179979	0	0	0	0
ADPRH	6.84341e-61	GBM	0.875759	4.21355e-08	GBM	0.683967	1.54666e-24	GBM	0.743706	1.78444e-59	1.62004e-07	5.08352e-23	1	1	0	0
ADPRHL1	1.58538e-09	LGG	0.678998	0.0328613	LGG	0.595936	1.32945e-05	LGG	0.614385	2.76058e-09	0.0490235	3.92828e-05	1	1	0	0
ADPRHL2	1.78583e-43	GBM	0.826484	1.22372e-16	GBM	0.760218	8.3151e-15	GBM	0.672469	1.70315e-42	2.1214e-15	7.97179e-14	1	1	0	0
ADPRM	0.021616	GBM	0.555861	0.0221366	LGG	0.566685	0.00526954	LGG	0.560155	0.0257169	0.0342169	0.00990141	0	1	0	0
ADRA1A	2.7894e-30	LGG	0.829658	1.88441e-18	LGG	0.76765	4.72275e-10	LGG	0.657633	1.27502e-29	4.79686e-17	2.53939e-09	1	1	0	0
ADRA1B	9.73599e-07	LGG	0.62971	0.0281005	LGG	0.550123	0.0433787	LGG	0.55166	1.48176e-06	0.0424974	0.0669633	1	0	0	0
ADRA1D	1.42593e-09	GBM	0.654348	0.014387	GBM	0.574117	0.0969863	GBM	0.544802	2.48882e-09	0.0231008	0.137817	1	0	0	0
ADRA2A	3.38589e-12	LGG	0.688933	1.36191e-06	LGG	0.67705	1.21898e-06	LGG	0.623909	6.63386e-12	4.14872e-06	4.17327e-06	1	1	0	0
ADRA2B	0.374825	GBM	0.520397	0.331735	GBM	0.502569	0.00542236	GBM	0.567199	0.398482	0.388868	0.0101595	1	0	0	0
ADRA2C	1.58507e-19	LGG	0.758342	0.000631494	LGG	0.641098	7.17378e-07	LGG	0.628972	4.28633e-19	0.00127602	2.53891e-06	1	1	0	0
ADRB1	8.47589e-06	LGG	0.602489	0.000155932	LGG	0.622737	0.00349977	LGG	0.5734	1.23128e-05	0.000347853	0.00681603	1	1	0	0
ADRB2	1.23323e-14	LGG	0.710635	2.22487e-08	LGG	0.69045	1.44294e-08	LGG	0.637421	2.68106e-14	8.91811e-08	6.40394e-08	1	1	0	0
ADRB3	7.36893e-05	GBM	0.618627	0.038054	LGG	0.520377	0.072202	LGG	0.506332	0.000101849	0.0559783	0.106017	0	0	0	0
ADRM1	5.96682e-14	GBM	0.720257	3.30446e-18	GBM	0.793699	1.23337e-07	GBM	0.625454	1.25875e-13	7.9545e-17	4.85482e-07	1	1	0	0
ADSL	4.40784e-24	GBM	0.810289	0.0147622	GBM	0.587912	0.138378	GBM	0.541298	1.46372e-23	0.0236365	0.188067	1	0	0	0
ADSS	0.000842509	GBM	0.603618	0.0022336	GBM	0.603526	0.000221153	GBM	0.581396	0.00109754	0.00413206	0.000537766	1	1	0	0
ADSSL1	1.86694e-38	GBM	0.835968	0.000187652	GBM	0.625702	5.72544e-10	GBM	0.639044	1.32785e-37	0.000412382	3.04252e-09	1	1	0	0
ADTRP	0.0398464	GBM	0.562698	0.215965	LGG	0.525061	0.914662	LGG	0.507293	0.0464633	0.2661	0.932827	0	0	0	0
AEBP1	5.41629e-47	GBM	0.827651	7.70301e-13	GBM	0.727567	2.26408e-24	GBM	0.735493	6.31114e-46	6.53925e-12	7.2145e-23	1	1	1	1
AEBP2	0.654948	LGG	0.511478	0.865083	GBM	0.519725	0.0031149	GBM	0.576228	0.67545	0.887731	0.00612641	0	0	0	0
AEN	1.19861e-34	GBM	0.782892	3.52184e-10	GBM	0.692426	3.05596e-10	GBM	0.646958	6.8654e-34	1.87659e-09	1.68406e-09	1	1	0	0
AES	5.89759e-09	GBM	0.660294	0.00764385	GBM	0.599534	0.948814	LGG	0.500385	9.98755e-09	0.0128977	0.960689	0	0	0	0
AFAP1	1.43384e-28	LGG	0.787182	0.00402946	LGG	0.596806	0.00704114	LGG	0.558768	5.98805e-28	0.00713329	0.0128965	1	1	0	0
AFAP1-AS1	1.24522e-08	LGG	0.643823	0.000688652	LGG	0.640466	0.38165	GBM	0.53624	2.07808e-08	0.00138191	0.455517	0	0	0	0
AFAP1L1	8.95345e-45	GBM	0.869161	1.57486e-14	GBM	0.754882	4.76235e-28	GBM	0.757169	9.27554e-44	1.82484e-13	2.73943e-26	1	1	1	1
AFAP1L2	2.02242e-13	LGG	0.687629	0.00259885	LGG	0.608467	0.00159564	LGG	0.573354	4.17808e-13	0.00475145	0.00332471	1	1	0	0
AFF1	0.00394669	LGG	0.574778	0.0699831	GBM	0.556012	0.0221026	GBM	0.541126	0.00492897	0.0970028	0.0364848	0	0	0	0
AFF2	6.77509e-43	LGG	0.874806	3.01828e-13	LGG	0.732074	5.79573e-06	LGG	0.679694	6.28815e-42	2.75218e-12	1.80272e-05	1	1	0	0
AFF3	6.29616e-30	LGG	0.835541	7.04465e-17	LGG	0.763104	0.000182002	LGG	0.616516	2.81811e-29	1.28538e-15	0.000449286	1	1	0	0
AFF4	3.2051e-35	LGG	0.820438	1.27558e-05	LGG	0.621314	0.45714	LGG	0.520892	1.8942e-34	3.34015e-05	0.529922	1	0	0	0
AFG3L1P	0.516522	LGG	0.520673	0.134167	GBM	0.535853	0.939996	GBM	0.516105	0.540015	0.173848	0.953219	0	0	0	0
AFG3L2	1.6261e-08	LGG	0.676502	0.347421	LGG	0.527907	0.889904	GBM	0.509995	2.69637e-08	0.405244	0.912586	0	0	0	0
AFMID	0.00223204	GBM	0.565169	0.469356	LGG	0.537197	0.492235	GBM	0.502126	0.00283163	0.526569	0.563914	0	0	0	0
AFP	1.31101e-21	GBM	0.770981	1.65302e-06	GBM	0.644715	2.21888e-10	GBM	0.675687	3.88439e-21	4.97648e-06	1.2409e-09	1	1	0	0
AFTPH	1.06712e-29	LGG	0.801608	0.00664939	LGG	0.580323	0.826863	LGG	0.515135	4.72719e-29	0.0113484	0.860911	1	0	0	0
AGA	1.7963e-21	GBM	0.772116	0.0727225	GBM	0.554787	1.67689e-06	GBM	0.608085	5.29206e-21	0.100392	5.64495e-06	1	0	0	0
AGAP1	9.25458e-22	LGG	0.75705	0.0031805	LGG	0.606846	0.135338	GBM	0.542314	2.76478e-21	0.00572477	0.184417	0	0	0	0
AGAP1-IT1	4.84838e-18	GBM	0.744769	0.0289452	GBM	0.587754	0.0623341	GBM	0.564801	1.22532e-17	0.0436445	0.0928981	1	0	0	0
AGAP11	2.81673e-08	LGG	0.637501	0.000116452	LGG	0.635861	0.00161789	LGG	0.595869	4.61559e-08	0.000264475	0.00336908	1	1	0	0
AGAP2	1.37116e-07	LGG	0.703936	9.10569e-09	LGG	0.696142	1.80907e-07	LGG	0.629543	2.18239e-07	3.86964e-08	6.94989e-07	1	1	0	0
AGAP2-AS1	4.38763e-60	GBM	0.929123	2.37118e-08	GBM	0.699423	8.18132e-35	GBM	0.81935	1.09399e-58	9.44897e-08	1.38046e-32	1	1	0	0
AGAP3	4.8406e-24	LGG	0.767349	5.57934e-07	LGG	0.671357	7.60698e-08	LGG	0.61638	1.60442e-23	1.79672e-06	3.07841e-07	1	1	0	0
AGAP4	0.00429933	LGG	0.591839	0.00102803	LGG	0.627599	8.4817e-11	LGG	0.656908	0.00535422	0.00200746	5.03418e-10	1	1	0	0
AGAP5	5.05143e-08	LGG	0.651525	0.310503	LGG	0.566171	0.00102498	LGG	0.590534	8.18701e-08	0.366892	0.00221675	1	0	0	0
AGAP6	0.0353056	LGG	0.562108	0.772829	LGG	0.538817	1.8066e-06	LGG	0.617449	0.0413187	0.807752	6.04827e-06	1	0	0	0
AGAP9	0.0017152	LGG	0.583823	0.012838	LGG	0.582635	0.0187546	LGG	0.552449	0.00219107	0.0207813	0.0314505	1	1	0	0
AGBL2	3.13437e-24	GBM	0.773396	2.55518e-05	GBM	0.644735	1.09133e-08	GBM	0.64209	1.04913e-23	6.38416e-05	4.9274e-08	1	1	0	0
AGBL3	1.79719e-17	GBM	0.726579	0.221824	LGG	0.528105	0.0548654	GBM	0.537627	4.41863e-17	0.272334	0.0828264	0	0	0	0
AGBL4	0.224067	LGG	0.508769	0.0157768	LGG	0.568187	0.1166	LGG	0.539009	0.244328	0.0251184	0.161783	1	0	0	0
AGBL5	3.56319e-13	GBM	0.711727	7.98947e-05	GBM	0.63503	0.0272327	GBM	0.557163	7.28526e-13	0.000185931	0.0440703	1	1	0	0
AGER	0.634947	LGG	0.514677	0.00843345	GBM	0.554036	0.0106585	LGG	0.554308	0.656133	0.0141078	0.0188367	0	0	0	0
AGFG1	0.0344402	LGG	0.562685	0.0689258	LGG	0.50585	0.00315365	GBM	0.560264	0.0403513	0.0956721	0.00619849	0	0	0	0
AGFG2	0.00213095	LGG	0.557241	0.872728	GBM	0.50842	0.00940378	GBM	0.564923	0.0027067	0.893867	0.016812	0	0	0	0
AGGF1	0.016579	LGG	0.562359	0.000287518	LGG	0.625306	0.189074	GBM	0.522777	0.0198756	0.000614397	0.247731	0	0	0	0
AGGF1P1	1.99513e-08	LGG	0.629648	8.73027e-05	LGG	0.632955	4.57422e-08	LGG	0.597718	3.29498e-08	0.000202004	1.90328e-07	1	1	0	0
AGGF1P2	1.71841e-19	LGG	0.725745	5.52103e-05	LGG	0.633607	1.20444e-09	LGG	0.613089	4.63698e-19	0.000131544	6.15134e-09	1	1	0	0
AGGF1P3	5.37439e-15	LGG	0.716456	0.0443319	LGG	0.602024	0.00382579	LGG	0.559896	1.18875e-14	0.0642529	0.00740134	1	0	0	0
AGK	1.2229e-10	GBM	0.67812	0.000122911	GBM	0.623528	0.00703317	GBM	0.547245	2.23545e-10	0.000278217	0.0128832	1	1	0	0
AGL	0.337097	LGG	0.534058	0.111197	LGG	0.542731	0.0265001	GBM	0.54381	0.360413	0.146933	0.0430183	0	0	0	0
AGMAT	1.23844e-05	GBM	0.595778	0.262035	LGG	0.515258	0.196248	GBM	0.533021	1.78583e-05	0.316051	0.255958	0	0	0	0
AGMO	1.56949e-12	GBM	0.675285	0.00306815	LGG	0.605344	0.0473286	GBM	0.536661	3.11832e-12	0.0055383	0.07248	0	0	0	0
AGO1	5.17784e-19	LGG	0.739237	0.626726	LGG	0.511029	0.21453	LGG	0.564515	1.36302e-18	0.676725	0.276484	1	0	0	0
AGO2	4.52717e-15	LGG	0.730355	0.483573	GBM	0.517195	0.00230785	GBM	0.589183	1.0045e-14	0.540432	0.00465167	0	0	0	0
AGO3	3.89071e-27	LGG	0.756285	0.0558543	GBM	0.553917	0.177501	GBM	0.516694	1.50653e-26	0.079191	0.234283	0	0	0	0
AGO4	8.27234e-33	LGG	0.820751	0.482493	LGG	0.520081	0.277192	LGG	0.523593	4.29252e-32	0.539361	0.34616	1	0	0	0
AGPAT1	0.000700205	LGG	0.579495	0.598861	LGG	0.522215	1.93072e-06	LGG	0.61104	0.000916152	0.650362	6.42927e-06	1	0	0	0
AGPAT2	1.19151e-13	GBM	0.706157	2.93152e-08	GBM	0.679145	4.45828e-05	GBM	0.609272	2.48391e-13	1.15366e-07	0.000121538	1	1	0	0
AGPAT3	3.23967e-24	LGG	0.784485	1.91794e-05	LGG	0.627757	0.00521572	LGG	0.564923	1.08355e-23	4.88711e-05	0.00980652	1	1	0	0
AGPAT4	4.22425e-28	LGG	0.811681	0.00130872	LGG	0.608388	0.0187365	LGG	0.553066	1.72298e-27	0.00251613	0.0314261	1	1	0	0
AGPAT5	0.095086	GBM	0.549451	1.71439e-07	LGG	0.654597	0.153348	LGG	0.546203	0.107531	5.998e-07	0.205948	0	0	0	0
AGPS	5.08091e-06	LGG	0.624969	0.0179823	LGG	0.57131	0.718129	LGG	0.503821	7.46759e-06	0.0282412	0.769795	1	0	0	0
AGRN	0.000262049	GBM	0.633825	1.29665e-09	GBM	0.708356	0.143569	GBM	0.536004	0.000351036	6.31119e-09	0.194229	1	0	0	0
AGRP	3.6889e-06	GBM	0.634672	0.698892	GBM	0.502016	0.20553	GBM	0.527111	5.45806e-06	0.742298	0.26639	1	0	0	0
AGT	0.0161869	LGG	0.577023	0.000101437	LGG	0.6376	0.0154236	LGG	0.569003	0.019428	0.000232581	0.0263918	1	1	0	0
AGTPBP1	5.38892e-20	LGG	0.749059	1.7942e-05	LGG	0.65017	0.744657	GBM	0.509786	1.48711e-19	4.59347e-05	0.792989	0	0	0	0
AGTR1	5.43194e-28	GBM	0.831163	0.314576	GBM	0.551051	2.53969e-06	GBM	0.643853	2.20487e-27	0.371136	8.32792e-06	1	0	0	0
AGTRAP	1.77571e-46	GBM	0.840822	6.91982e-16	GBM	0.747134	4.81828e-13	GBM	0.664282	2.00298e-45	1.03985e-14	3.77056e-12	1	1	0	0
AHCTF1	3.77898e-18	LGG	0.75434	0.0659181	LGG	0.550597	0.882497	GBM	0.505943	9.59999e-18	0.0919149	0.906494	0	0	0	0
AHCY	2.18038e-34	GBM	0.874856	2.21135e-06	GBM	0.647442	1.16894e-06	GBM	0.615491	1.22972e-33	6.53082e-06	4.01126e-06	1	1	0	0
AHCYL1	1.38404e-12	LGG	0.688331	1.16274e-10	LGG	0.711005	1.80236e-09	LGG	0.62676	2.75668e-12	6.67972e-10	8.97989e-09	1	1	0	0
AHCYL2	1.5451e-12	LGG	0.70208	5.58141e-07	LGG	0.669025	0.000948417	LGG	0.576509	3.07055e-12	1.79695e-06	0.00206629	1	1	0	0
AHCYP2	0.00111489	GBM	0.596254	0.0629066	LGG	0.562337	0.483167	LGG	0.512406	0.00144131	0.0882087	0.555502	0	0	0	0
AHDC1	3.27409e-08	LGG	0.667043	0.711858	LGG	0.51506	0.331953	LGG	0.529232	5.34667e-08	0.753584	0.403791	1	0	0	0
AHI1	0.000243861	LGG	0.590132	0.635944	LGG	0.532058	0.171748	LGG	0.532251	0.000327392	0.685169	0.227602	1	0	0	0
AHNAK	1.63842e-41	LGG	0.860718	5.96699e-06	LGG	0.653609	0.0447152	LGG	0.562548	1.40131e-40	1.64591e-05	0.0688108	1	0	0	0
AHNAK2	0.000128273	GBM	0.601234	0.00826612	GBM	0.587912	1.24722e-12	GBM	0.662678	0.000174898	0.0138527	9.31183e-12	1	1	0	0
AHR	4.90192e-28	GBM	0.802273	2.3982e-06	GBM	0.649972	4.38278e-17	GBM	0.694879	1.99386e-27	7.04157e-06	5.55832e-16	1	1	0	0
AHRR	0.714856	LGG	0.503889	0.490639	LGG	0.50925	0.122593	GBM	0.548895	0.732576	0.547465	0.168987	0	0	0	0
AHSA1	1.89706e-15	LGG	0.708616	0.000207432	LGG	0.624595	2.22501e-05	LGG	0.595665	4.28082e-15	0.000452038	6.34279e-05	1	1	0	0
AHSA2	1.14244e-05	LGG	0.629685	0.974374	GBM	0.509882	0.308427	LGG	0.52751	1.65105e-05	0.979738	0.379078	0	0	0	0
AHSG	2.76051e-08	LGG	0.637413	0.000539127	LGG	0.617499	0.000259413	LGG	0.604685	4.5245e-08	0.00110272	0.000622598	1	1	0	0
AIDA	6.12859e-58	GBM	0.89933	0.0760736	GBM	0.58554	0.138835	GBM	0.540546	1.34898e-56	0.104529	0.188631	1	0	0	0
AIF1	1.29655e-12	GBM	0.684844	0.000490996	GBM	0.615859	0.0717801	GBM	0.537917	2.58651e-12	0.00101057	0.105459	1	0	0	0
AIF1L	0.0146761	LGG	0.561644	0.0117294	LGG	0.572733	0.0085372	LGG	0.558079	0.0176688	0.0191389	0.015401	1	1	0	0
AIFM1	0.890925	GBM	0.504353	7.0529e-11	GBM	0.698711	0.569878	GBM	0.515081	0.897893	4.19035e-10	0.636844	1	0	0	0
AIFM2	0.41328	LGG	0.50281	0.0108827	GBM	0.589889	0.031502	LGG	0.533266	0.437179	0.0178511	0.0503129	0	0	0	0
AIFM3	2.85709e-20	LGG	0.737481	6.03972e-08	LGG	0.685667	6.87765e-07	LGG	0.618918	7.99053e-20	2.27382e-07	2.43898e-06	1	1	0	0
AIG1	0.211098	GBM	0.52179	5.4078e-06	LGG	0.657997	5.33888e-06	LGG	0.620196	0.230901	1.50008e-05	1.67059e-05	0	0	0	0
AIM2	0.0215772	LGG	0.566361	0.0039634	LGG	0.58305	0.365742	LGG	0.535311	0.0256759	0.00702406	0.439461	1	0	0	0
AIMP1	0.00621881	GBM	0.555823	0.43268	LGG	0.517946	0.516373	LGG	0.504111	0.00767107	0.490924	0.587049	0	0	0	0
AIMP2	5.07939e-13	GBM	0.695557	0.000925293	GBM	0.597992	0.754257	GBM	0.508454	1.0335e-12	0.00182088	0.800814	1	0	0	0
AIP	3.31869e-07	LGG	0.647348	0.0461682	LGG	0.585343	5.14329e-07	LGG	0.600306	5.17534e-07	0.066593	1.85891e-06	1	0	0	0
AIRE	0.138867	GBM	0.536316	0.049913	GBM	0.525219	0.00896772	GBM	0.555006	0.154654	0.0715518	0.0161039	1	0	0	0
AJAP1	6.16691e-45	LGG	0.865309	2.55015e-08	LGG	0.690608	0.000401368	LGG	0.599046	6.4608e-44	1.01076e-07	0.000932351	1	1	0	0
AJUBA	1.03067e-27	GBM	0.776757	1.79738e-09	GBM	0.696577	4.88643e-09	GBM	0.64704	4.13511e-27	8.56029e-09	2.30063e-08	1	1	0	0
AK1	1.81987e-07	LGG	0.683175	0.591918	LGG	0.554787	0.00709782	LGG	0.551017	2.88076e-07	0.643731	0.0129909	1	0	0	0
AK2	9.36368e-81	GBM	0.959393	6.08165e-32	GBM	0.847063	2.60427e-24	GBM	0.733489	6.80235e-79	1.79581e-28	8.18082e-23	1	1	1	1
AK3	0.000307338	LGG	0.605198	6.66229e-06	LGG	0.648431	0.0509652	LGG	0.54322	0.000410304	1.82605e-05	0.0774666	1	0	0	0
AK3P3	0.0801812	LGG	0.55428	0.978453	LGG	0.507629	0.00544333	LGG	0.539929	0.0912479	0.983003	0.0101901	1	0	0	0
AK4	6.50519e-20	GBM	0.758493	2.44426e-07	GBM	0.672583	1.28505e-17	GBM	0.70127	1.78928e-19	8.32307e-07	1.7157e-16	1	1	0	0
AK4P3	1.13473e-27	GBM	0.793969	0.26483	LGG	0.544035	0.00434175	LGG	0.565748	4.53714e-27	0.319053	0.00829356	0	0	0	0
AK5	4.36196e-22	LGG	0.751543	3.98254e-10	LGG	0.70132	5.99094e-06	LGG	0.617132	1.32419e-21	2.09996e-09	1.85952e-05	1	1	0	0
AK7	4.4964e-07	GBM	0.637438	0.121433	GBM	0.541742	0.000166391	GBM	0.594631	6.96699e-07	0.159106	0.000413921	1	0	0	0
AK8	0.0808093	LGG	0.542024	0.00884656	LGG	0.61159	0.000315187	LGG	0.572575	0.0919331	0.0147459	0.000744753	1	0	0	0
AK9	6.19041e-15	LGG	0.710033	0.0503772	LGG	0.580164	0.0849106	LGG	0.558759	1.36446e-14	0.0721471	0.122425	1	0	0	0
AKAP1	1.22933e-50	LGG	0.893309	0.000176602	LGG	0.639616	7.75214e-10	LGG	0.640141	1.78172e-49	0.000389598	4.05745e-09	1	1	0	0
AKAP10	1.34344e-06	LGG	0.634126	0.43858	LGG	0.537987	0.636518	LGG	0.516631	2.02994e-06	0.496602	0.697372	1	0	0	0
AKAP11	3.00554e-82	LGG	0.935283	2.64981e-24	LGG	0.821923	7.76369e-15	LGG	0.685142	2.31689e-80	3.21552e-22	7.49179e-14	1	1	0	0
AKAP12	5.6702e-09	GBM	0.667745	2.97865e-06	GBM	0.660922	2.95292e-17	GBM	0.69138	9.61445e-09	8.60613e-06	3.80763e-16	1	1	0	0
AKAP13	1.54184e-19	LGG	0.758769	0.0241279	GBM	0.580243	0.424791	GBM	0.519441	4.17135e-19	0.036982	0.498676	0	0	0	0
AKAP14	0.000573564	GBM	0.566147	0.025129	GBM	0.506957	0.047375	GBM	0.501727	0.000754255	0.0383636	0.0725447	1	0	0	0
AKAP17A	0.000132742	LGG	0.596718	0.0108101	GBM	0.588584	0.0259234	GBM	0.546393	0.000180781	0.0177386	0.042202	0	1	0	0
AKAP2	0.875046	GBM	0.51208	5.56001e-08	GBM	0.687525	2.54377e-14	GBM	0.671435	0.882999	2.10104e-07	2.29917e-13	1	0	0	0
AKAP3	2.28718e-28	LGG	0.811506	1.65879e-10	LGG	0.708198	8.92043e-07	LGG	0.626443	9.47116e-28	9.29731e-10	3.116e-06	1	1	0	0
AKAP5	9.9447e-16	LGG	0.65998	1.02677e-06	LGG	0.678789	0.00479243	LGG	0.589555	2.27313e-15	3.18029e-06	0.00908977	1	1	0	0
AKAP6	9.84718e-64	LGG	0.93882	1.75076e-26	LGG	0.829038	8.13463e-08	LGG	0.656413	3.01792e-62	5.96505e-24	3.27996e-07	1	1	0	0
AKAP7	5.3234e-14	LGG	0.728913	3.12803e-05	LGG	0.655664	3.91818e-09	LGG	0.6611	1.12611e-13	7.71749e-05	1.86559e-08	1	1	0	0
AKAP8	0.437633	GBM	0.535626	2.23459e-12	GBM	0.731599	5.10403e-07	GBM	0.614213	0.461419	1.73794e-11	1.84585e-06	1	0	0	0
AKAP8L	4.13323e-20	LGG	0.771526	0.444321	LGG	0.541189	0.0049315	LGG	0.549312	1.14741e-19	0.502395	0.0093216	1	0	0	0
AKAP9	5.59574e-55	LGG	0.937328	1.29136e-07	LGG	0.673887	0.0016534	LGG	0.578567	1.04864e-53	4.61177e-07	0.00343374	1	1	0	0
AKIP1	2.23113e-08	GBM	0.665751	0.0212818	GBM	0.574235	0.784963	LGG	0.504891	3.67374e-08	0.0329877	0.825794	0	0	0	0
AKIRIN1	1.94134e-28	GBM	0.75005	1.11963e-05	GBM	0.636888	4.68761e-07	GBM	0.613306	8.07315e-28	2.95891e-05	1.7029e-06	1	1	0	0
AKIRIN2	1.16527e-08	GBM	0.687654	0.324715	LGG	0.506166	0.812226	GBM	0.510593	1.94742e-08	0.381498	0.84868	0	0	0	0
AKNA	8.05234e-20	LGG	0.764614	0.298871	LGG	0.545695	0.0304705	LGG	0.550482	2.20555e-19	0.355066	0.0488057	1	0	0	0
AKNAD1	1.92386e-10	GBM	0.678396	0.0177717	GBM	0.570401	0.000251147	GBM	0.58504	3.48721e-10	0.0279478	0.000604562	1	1	0	0
AKR1A1	1.17016e-19	GBM	0.747692	3.03568e-07	GBM	0.659736	0.0574989	GBM	0.551814	3.18386e-19	1.0192e-06	0.086419	1	0	0	0
AKR1B1	4.87804e-24	GBM	0.789315	0.00410144	GBM	0.595976	0.380866	GBM	0.518235	1.61622e-23	0.00725201	0.454776	1	0	0	0
AKR1B10	1.64878e-15	GBM	0.719918	0.00556525	GBM	0.64349	3.49618e-05	GBM	0.655217	3.73201e-15	0.00962323	9.68597e-05	1	1	0	0
AKR1B15	0.309456	GBM	0.526977	0.375466	LGG	0.53443	0.320486	GBM	0.540618	0.33237	0.433901	0.391724	0	0	0	0
AKR1C1	2.87306e-29	LGG	0.813801	1.47459e-14	LGG	0.752471	1.08328e-17	LGG	0.703056	1.24188e-28	1.72103e-13	1.45288e-16	1	1	1	1
AKR1C2	2.09974e-12	LGG	0.710874	6.53007e-15	LGG	0.763578	2.67601e-10	LGG	0.677024	4.15035e-12	8.12452e-14	1.48251e-09	1	1	0	0
AKR1C3	1.59854e-32	LGG	0.827688	1.54221e-18	LGG	0.780022	1.99061e-26	LGG	0.739998	8.17469e-32	3.99464e-17	8.99685e-25	1	1	1	1
AKR1E2	0.332724	GBM	0.523559	0.0153982	LGG	0.577872	0.4429	GBM	0.515108	0.355953	0.0245651	0.516173	0	0	0	0
AKR7A2	7.69752e-19	GBM	0.728361	0.007206	GBM	0.578148	0.725316	LGG	0.503096	2.01042e-18	0.0122124	0.776085	0	0	0	0
AKR7A2P1	3.71543e-07	GBM	0.636522	0.644948	LGG	0.52769	0.208881	GBM	0.52071	5.78177e-07	0.693232	0.26999	0	0	0	0
AKR7A3	0.000322515	GBM	0.593607	0.258852	GBM	0.523559	0.801452	GBM	0.508173	0.000430012	0.312658	0.8397	1	0	0	0
AKR7L	0.701592	GBM	0.514677	0.669474	GBM	0.515258	0.0208269	LGG	0.559747	0.720321	0.715945	0.0345853	0	0	0	0
AKT1	0.00165387	GBM	0.629974	1.09953e-09	GBM	0.683335	0.000234796	GBM	0.58601	0.00211472	5.41573e-09	0.000568468	1	1	0	0
AKT1S1	3.86888e-12	GBM	0.683163	3.74074e-10	GBM	0.694324	0.0678353	GBM	0.545858	7.56674e-12	1.98665e-09	0.100178	1	0	0	0
AKT2	8.66653e-12	GBM	0.681469	1.43523e-07	GBM	0.681437	0.000816083	GBM	0.583091	1.66765e-11	5.08456e-07	0.0017981	1	1	0	0
AKT3	3.28985e-45	LGG	0.900083	2.4371e-10	LGG	0.718436	0.157111	LGG	0.590062	3.48803e-44	1.33266e-09	0.210269	1	0	0	0
AKTIP	3.98466e-16	LGG	0.743314	1.20359e-19	LGG	0.788284	1.47773e-14	LGG	0.691688	9.23234e-16	3.95622e-18	1.3794e-13	1	1	0	0
ALAD	1.22304e-31	LGG	0.790469	4.47063e-07	LGG	0.673611	0.217166	LGG	0.554652	5.96746e-31	1.45922e-06	0.279394	1	0	0	0
ALAS1	6.94023e-12	GBM	0.677254	0.032234	GBM	0.584354	0.000123665	GBM	0.585946	1.34029e-11	0.0481688	0.000313847	1	1	0	0
ALAS2	5.60225e-13	GBM	0.714098	0.587315	LGG	0.506582	0.0337292	GBM	0.537169	1.1374e-12	0.639588	0.0534843	0	0	0	0
ALB	3.83821e-30	LGG	0.804907	0.000192933	LGG	0.650644	0.00499826	LGG	0.600619	1.74046e-29	0.000423044	0.00943772	1	1	0	0
ALCAM	3.31115e-39	LGG	0.876988	9.22188e-17	LGG	0.770179	1.03229e-31	LGG	0.784846	2.46009e-38	1.63384e-15	1.01045e-29	1	1	1	1
ALDH16A1	1.51562e-16	GBM	0.715515	1.85333e-19	GBM	0.785872	0.00331776	GBM	0.586672	3.57834e-16	5.82188e-18	0.00649512	1	1	0	0
ALDH18A1	7.30974e-05	LGG	0.63227	0.0451059	GBM	0.546802	0.00583581	LGG	0.573735	0.000101056	0.0652892	0.0108481	0	0	0	0
ALDH1A1	5.28744e-12	LGG	0.684354	2.67888e-07	LGG	0.669025	2.99097e-05	LGG	0.598357	1.0283e-11	9.07141e-07	8.37669e-05	1	1	0	0
ALDH1A2	0.23276	GBM	0.517462	0.840855	GBM	0.51257	0.682584	GBM	0.508145	0.253246	0.867239	0.739247	1	0	0	0
ALDH1A3	9.43313e-10	GBM	0.674934	2.7664e-05	GBM	0.633212	0.000791032	GBM	0.613991	1.65893e-09	6.87989e-05	0.00174747	1	1	0	0
ALDH1B1	0.91804	LGG	0.501719	0.418858	GBM	0.539173	0.0524884	LGG	0.537391	0.923796	0.477352	0.0795769	0	0	0	0
ALDH1L1	0.414596	LGG	0.513385	0.0196721	LGG	0.578702	0.131676	LGG	0.532414	0.438518	0.0306832	0.179952	1	0	0	0
ALDH1L1-AS2	2.87205e-05	GBM	0.619838	0.513955	GBM	0.501067	0.0134851	GBM	0.534522	4.06058e-05	0.570035	0.0233636	1	0	0	0
ALDH1L2	1.13842e-33	LGG	0.798146	8.37547e-09	LGG	0.676773	1.02539e-07	LGG	0.630141	6.20646e-33	3.58339e-08	4.0751e-07	1	1	0	0
ALDH2	8.32492e-74	LGG	0.919088	2.85396e-21	LGG	0.787967	1.72493e-31	LGG	0.762345	4.22299e-72	1.3853e-19	1.60003e-29	1	1	1	1
ALDH3A1	3.83496e-30	GBM	0.815972	0.00528417	GBM	0.578979	7.9251e-12	GBM	0.686208	1.73943e-29	0.00916133	5.3776e-11	1	1	0	0
ALDH3A2	0.224549	LGG	0.520887	0.822992	GBM	0.518579	0.286322	GBM	0.525316	0.24481	0.85209	0.355709	0	0	0	0
ALDH3B1	4.64331e-11	GBM	0.687516	1.79533e-08	GBM	0.675508	1.97995e-14	GBM	0.68419	8.64189e-11	7.29871e-08	1.81098e-13	1	1	0	0
ALDH4A1	1.72313e-05	LGG	0.621833	0.00264909	LGG	0.60902	0.294504	LGG	0.520692	2.46403e-05	0.00483208	0.364443	1	0	0	0
ALDH5A1	5.94245e-69	LGG	0.939987	4.20083e-32	LGG	0.852399	1.29215e-41	LGG	0.803394	2.45098e-67	1.48852e-28	6.93727e-39	1	1	1	1
ALDH6A1	3.95523e-51	LGG	0.876512	5.86097e-24	LGG	0.808404	1.64974e-16	LGG	0.681253	5.93218e-50	6.10816e-22	1.96824e-15	1	1	0	0
ALDH7A1	0.838633	LGG	0.533256	0.276749	LGG	0.539371	6.10033e-06	GBM	0.605492	0.849168	0.331766	1.89116e-05	0	0	0	0
ALDH7A1P1	2.34231e-109	GBM	0.980707	0.00116883	LGG	0.607558	0.0384085	LGG	0.580874	4.54382e-107	0.00226392	0.0600868	0	0	0	0
ALDH8A1	0.00422812	LGG	0.567653	0.431278	LGG	0.520061	0.280121	LGG	0.524445	0.00526889	0.489647	0.349132	1	0	0	0
ALDH9A1	1.55979e-05	LGG	0.615146	9.98793e-11	LGG	0.700372	3.09172e-05	LGG	0.597859	2.2357e-05	5.80374e-10	8.63838e-05	1	1	0	0
ALDOA	9.67822e-10	GBM	0.669439	0.00125351	GBM	0.603289	0.610714	GBM	0.520076	1.70169e-09	0.00241869	0.674183	1	0	0	0
ALDOB	7.25566e-28	LGG	0.803026	0.00180998	LGG	0.615819	0.121239	LGG	0.55981	2.93463e-27	0.00340238	0.167342	1	0	0	0
ALDOC	1.64107e-37	LGG	0.85762	1.98549e-21	LGG	0.803344	1.70699e-34	LGG	0.778346	1.10026e-36	1.00505e-19	2.72456e-32	1	1	1	1
ALG1	2.41736e-52	GBM	0.880538	3.92272e-07	GBM	0.690331	9.62336e-10	GBM	0.659858	3.83411e-51	1.29252e-06	4.97076e-09	1	1	0	0
ALG10	1.05188e-15	GBM	0.708013	0.868654	LGG	0.501502	0.012752	GBM	0.562811	2.39969e-15	0.89057	0.0222128	0	0	0	0
ALG10B	2.2846e-20	LGG	0.739274	0.000285195	LGG	0.605226	0.146061	GBM	0.549847	6.42506e-20	0.000609872	0.197223	0	0	0	0
ALG11	3.70053e-11	LGG	0.67334	5.32947e-07	LGG	0.66693	0.0843019	LGG	0.51877	6.923e-11	1.72115e-06	0.121706	1	0	0	0
ALG12	2.98652e-07	GBM	0.645291	0.00344127	GBM	0.58645	7.80976e-09	GBM	0.627104	4.67137e-07	0.00616097	3.59018e-08	1	1	0	0
ALG13	0.0380473	GBM	0.523697	0.00112347	GBM	0.591193	0.114384	GBM	0.520919	0.044433	0.0021814	0.159082	1	0	0	0
ALG14	5.94969e-40	GBM	0.855575	1.01718e-06	GBM	0.66863	0.000110392	GBM	0.588041	4.62279e-39	3.15335e-06	0.000282346	1	1	0	0
ALG1L	1.04376e-06	LGG	0.673466	2.82933e-11	LGG	0.714385	9.60909e-11	LGG	0.648789	1.58621e-06	1.80314e-10	5.66725e-10	1	1	0	0
ALG2	2.00021e-36	GBM	0.857206	1.13904e-05	GBM	0.640802	5.33324e-20	GBM	0.712412	1.26332e-35	3.00526e-05	9.34609e-19	1	1	0	0
ALG3	2.05452e-67	GBM	0.939874	4.05395e-11	GBM	0.71808	5.94074e-09	GBM	0.63986	7.71668e-66	2.51484e-10	2.76906e-08	1	1	0	0
ALG5	2.70483e-28	GBM	0.844586	0.000447912	GBM	0.616729	0.774384	GBM	0.542105	1.11614e-27	0.00092869	0.817431	1	0	0	0
ALG6	3.0235e-51	GBM	0.900221	2.67334e-11	GBM	0.719978	1.37213e-11	GBM	0.652134	4.56186e-50	1.71297e-10	9.05738e-11	1	1	0	0
ALG8	7.62251e-45	GBM	0.870202	0.00151317	GBM	0.641039	0.171271	GBM	0.537998	7.92462e-44	0.00287834	0.227076	1	0	0	0
ALK	0.0866026	LGG	0.539139	0.190535	GBM	0.51676	0.00343157	GBM	0.586672	0.0983032	0.238162	0.0066972	0	0	0	0
ALKBH1	5.26468e-07	GBM	0.638341	0.886516	LGG	0.509526	0.807371	GBM	0.514319	8.13171e-07	0.905582	0.844952	0	0	0	0
ALKBH2	0.0960177	GBM	0.52475	0.00872982	GBM	0.551467	0.00210098	LGG	0.560672	0.108549	0.014565	0.00427508	0	0	0	0
ALKBH3	0.000419891	GBM	0.609727	0.00016478	GBM	0.625702	0.107573	LGG	0.505362	0.000556273	0.000366297	0.150686	0	0	0	0
ALKBH3-AS1	0.000898375	LGG	0.591211	0.294038	LGG	0.528461	0.037244	LGG	0.559842	0.00116808	0.349911	0.0585027	1	0	0	0
ALKBH4	0.0220032	GBM	0.571052	0.000175594	GBM	0.610444	0.772601	GBM	0.515942	0.0261617	0.000387615	0.815994	1	0	0	0
ALKBH5	0.308083	LGG	0.527008	4.3998e-12	GBM	0.715709	4.0952e-06	GBM	0.620441	0.330955	3.24256e-11	1.30521e-05	0	0	0	0
ALKBH6	9.4971e-12	GBM	0.665111	4.8903e-10	GBM	0.702585	0.114793	GBM	0.563573	1.82548e-11	2.54454e-09	0.159588	1	0	0	0
ALKBH7	6.77277e-08	GBM	0.651601	0.971483	GBM	0.506483	0.00183664	LGG	0.548261	1.09227e-07	0.977386	0.00377667	0	0	0	0
ALKBH8	1.0015e-18	LGG	0.734959	0.00299667	LGG	0.586015	0.358559	GBM	0.512633	2.60566e-18	0.00541811	0.43212	0	0	0	0
ALLC	9.35676e-09	GBM	0.653733	0.269995	GBM	0.564234	0.17259	GBM	0.554516	1.56995e-08	0.324394	0.22855	1	0	0	0
ALMS1	1.16319e-34	LGG	0.850607	0.283372	GBM	0.510396	0.0646919	GBM	0.533674	6.66682e-34	0.338834	0.0960244	0	0	0	0
ALMS1-IT1	5.71204e-10	LGG	0.658287	0.0725312	GBM	0.549174	0.322549	LGG	0.506731	1.01413e-09	0.100143	0.393758	0	0	0	0
ALOX12	4.85489e-09	LGG	0.652416	0.306794	LGG	0.528915	0.396027	GBM	0.502479	8.25739e-09	0.363187	0.470458	0	0	0	0
ALOX12B	6.44571e-33	LGG	0.800554	1.66215e-10	LGG	0.699601	4.42833e-13	LGG	0.693188	3.37044e-32	9.3132e-10	3.48387e-12	1	1	0	0
ALOX12P2	0.000408005	GBM	0.604922	0.00808975	GBM	0.578425	1.63619e-05	GBM	0.594087	0.000540933	0.0135867	4.75844e-05	1	1	0	0
ALOX15	0.067785	LGG	0.564441	0.421491	LGG	0.540912	0.00729935	LGG	0.586196	0.0776212	0.479828	0.0133391	1	0	0	0
ALOX15B	0.000415884	GBM	0.58376	0.00815738	GBM	0.588762	8.50753e-07	GBM	0.61735	0.000551047	0.0136886	2.98294e-06	1	1	0	0
ALOX5	1.9259e-25	GBM	0.761491	6.63524e-08	GBM	0.681714	2.17817e-14	GBM	0.668516	6.88077e-25	2.48167e-07	1.98307e-13	1	1	0	0
ALOX5AP	3.09815e-56	GBM	0.886422	8.67803e-12	GBM	0.724919	2.59494e-16	GBM	0.680088	6.17287e-55	6.10114e-11	3.03062e-15	1	1	0	0
ALOXE3	1.23612e-15	LGG	0.713144	0.00220037	LGG	0.619219	0.000734934	LGG	0.633577	2.8131e-15	0.00407526	0.00163435	1	1	0	0
ALPK1	4.29997e-15	GBM	0.713796	4.08047e-06	GBM	0.650605	3.9404e-16	GBM	0.68885	9.5565e-15	1.15485e-05	4.50469e-15	1	1	0	0
ALPK2	3.08e-30	GBM	0.822231	0.0039847	GBM	0.645664	1.061e-12	GBM	0.719664	1.40458e-29	0.00705898	7.97532e-12	1	1	0	0
ALPK3	1.14373e-15	GBM	0.72402	4.1189e-06	GBM	0.663214	7.6971e-11	GBM	0.662306	2.60586e-15	1.16498e-05	4.60086e-10	1	1	0	0
ALPL	4.0428e-20	LGG	0.748043	2.56186e-07	LGG	0.67705	3.71581e-23	LGG	0.722892	1.12266e-19	8.70011e-07	1.01438e-21	1	1	0	0
ALS2	3.68979e-28	LGG	0.783419	0.019944	LGG	0.568741	0.126791	GBM	0.51615	1.51127e-27	0.0310635	0.17392	0	0	0	0
ALS2CL	0.419873	LGG	0.527184	0.161461	GBM	0.517551	0.0541033	GBM	0.543846	0.4437	0.205762	0.0817804	0	0	0	0
ALS2CR12	0.347447	LGG	0.510951	0.258432	GBM	0.534766	0.0202344	GBM	0.570988	0.370917	0.312249	0.0337021	0	0	0	0
ALX3	2.16163e-06	GBM	0.622071	0.00452128	GBM	0.549767	2.82634e-06	GBM	0.597795	3.23603e-06	0.00793419	9.20989e-06	1	1	0	0
ALX4	0.00528016	GBM	0.575832	0.288315	GBM	0.525536	0.838089	GBM	0.531208	0.00653927	0.343978	0.87011	1	0	0	0
ALYREF	3.85037e-28	GBM	0.798347	1.2671e-12	GBM	0.728002	0.0195722	GBM	0.552558	1.57485e-27	1.04221e-11	0.0326978	1	1	0	0
AMACR	0.0303704	LGG	0.551571	0.00437051	LGG	0.591233	0.81628	LGG	0.503368	0.0357277	0.00768559	0.851961	1	0	0	0
AMBP	0.0172638	GBM	0.565821	0.551596	LGG	0.546763	0.483949	GBM	0.559402	0.020677	0.605528	0.55622	0	0	0	0
AMBRA1	1.58684e-17	LGG	0.7642	0.739186	GBM	0.514823	0.134221	GBM	0.527736	3.91017e-17	0.777589	0.183022	0	0	0	0
AMD1	6.49437e-07	GBM	0.638454	0.127685	GBM	0.557356	0.00109363	GBM	0.564815	9.97782e-07	0.166362	0.00235345	1	0	0	0
AMDHD1	0.00227356	GBM	0.580034	0.78191	GBM	0.500791	0.489827	LGG	0.510503	0.00288328	0.81556	0.561529	0	0	0	0
AMDHD2	0.81238	LGG	0.507188	0.000203015	GBM	0.624239	0.27058	GBM	0.536729	0.824572	0.000443121	0.338932	0	0	0	0
AMER1	3.45424e-14	LGG	0.727056	0.0359411	LGG	0.592102	0.79801	LGG	0.519487	7.36001e-14	0.0531704	0.836687	1	0	0	0
AMER2	1.18255e-57	LGG	0.944578	1.27408e-22	LGG	0.809234	1.16042e-20	LGG	0.723218	2.56773e-56	8.6819e-21	2.1918e-19	1	1	1	1
AMER3	6.42026e-45	LGG	0.850946	7.26456e-18	LGG	0.762313	7.03566e-20	LGG	0.722987	6.71426e-44	1.64586e-16	1.21425e-18	1	1	1	1
AMFR	0.317753	LGG	0.505244	0.307339	GBM	0.533441	0.10231	GBM	0.53158	0.340825	0.363736	0.144443	0	0	0	0
AMH	2.30803e-07	LGG	0.64923	0.0125452	LGG	0.587122	2.64715e-07	LGG	0.617558	3.63264e-07	0.020365	9.94899e-07	1	1	0	0
AMIGO1	4.54605e-10	LGG	0.672625	0.000258075	LGG	0.623251	0.0227038	LGG	0.555132	8.10703e-10	0.000555026	0.0374006	1	1	0	0
AMIGO2	1.65462e-22	GBM	0.753726	3.82446e-05	GBM	0.622618	1.56023e-11	GBM	0.673511	5.11989e-22	9.32407e-05	1.02342e-10	1	1	0	0
AMIGO3	0.823194	GBM	0.517688	0.000405721	GBM	0.657957	4.80121e-05	GBM	0.604005	0.834491	0.000847362	0.000130086	1	0	0	0
AMMECR1	1.6389e-10	GBM	0.687629	5.03548e-07	GBM	0.67867	0.000373917	GBM	0.585004	2.98078e-10	1.62977e-06	0.000873278	1	1	0	0
AMMECR1L	0.32916	LGG	0.515367	0.102659	GBM	0.550478	0.635534	GBM	0.506224	0.352332	0.136825	0.696595	0	0	0	0
AMN	0.581621	LGG	0.505538	0.211889	LGG	0.533165	0.45978	GBM	0.545867	0.603678	0.261747	0.532552	0	0	0	0
AMN1	1.47876e-06	LGG	0.644827	1.05246e-14	LGG	0.765555	1.75157e-09	LGG	0.659514	2.22945e-06	1.26075e-13	8.73908e-09	1	1	0	0
AMOT	3.10236e-31	LGG	0.80857	1.22818e-17	LGG	0.765436	8.10713e-10	LGG	0.645653	1.48272e-30	2.64717e-16	4.23325e-09	1	1	0	0
AMOTL1	5.39995e-22	LGG	0.757075	0.00215978	LGG	0.594039	0.0207786	LGG	0.576038	1.63033e-21	0.00400667	0.0345148	1	1	0	0
AMOTL2	1.29511e-37	LGG	0.838828	1.1709e-08	LGG	0.688118	1.35697e-11	LGG	0.665098	8.73281e-37	4.89958e-08	8.96736e-11	1	1	0	0
AMPD2	1.88491e-09	LGG	0.667645	0.220492	GBM	0.546723	0.560555	GBM	0.503631	3.26957e-09	0.270867	0.628647	0	0	0	0
AMPD3	0.349498	GBM	0.517412	0.334906	GBM	0.522373	1.45877e-06	GBM	0.606127	0.372993	0.392067	4.94832e-06	1	0	0	0
AMPH	4.30814e-12	LGG	0.668837	1.93347e-07	LGG	0.671911	2.71429e-06	LGG	0.618891	8.40906e-12	6.69965e-07	8.86435e-06	1	1	0	0
AMT	0.658257	LGG	0.510174	0.000184433	LGG	0.641711	0.000444472	LGG	0.58844	0.678632	0.000405812	0.00102269	1	0	0	0
AMY2A	0.705729	GBM	0.517738	2.04978e-07	LGG	0.682544	9.71975e-08	LGG	0.637339	0.724017	7.07088e-07	3.87587e-07	0	0	0	0
AMY2B	0.000126299	LGG	0.598048	0.563113	LGG	0.531267	0.012826	LGG	0.562186	0.000172287	0.616339	0.0223285	1	0	0	0
AMZ1	1.55315e-50	LGG	0.88247	9.50011e-24	LGG	0.795162	2.2825e-26	LGG	0.72824	2.24001e-49	9.09802e-22	1.01606e-24	1	1	1	1
AMZ2	0.0164908	GBM	0.563764	0.0305706	LGG	0.583406	0.0410137	LGG	0.536747	0.0197739	0.04583	0.0637907	0	0	0	0
AMZ2P1	0.0156904	GBM	0.504177	0.0224078	LGG	0.612104	0.784437	GBM	0.515561	0.0188437	0.0345969	0.825388	0	0	0	0
ANAPC1	0.00283607	GBM	0.563237	0.0464574	GBM	0.557514	0.0025918	GBM	0.567552	0.00357455	0.0669611	0.00517454	1	0	0	0
ANAPC10	4.91091e-22	GBM	0.782327	0.912537	LGG	0.504941	0.0837485	GBM	0.564887	1.48573e-21	0.928095	0.121025	0	0	0	0
ANAPC11	4.44012e-28	GBM	0.832204	0.000302601	GBM	0.599415	0.343805	LGG	0.503114	1.80936e-27	0.000644373	0.416428	0	0	0	0
ANAPC13	0.00447839	GBM	0.569823	0.000373615	LGG	0.637284	0.0167381	LGG	0.57136	0.00557171	0.000784468	0.0284024	0	1	0	0
ANAPC15	0.00543076	GBM	0.580185	0.148811	GBM	0.537157	0.0058643	LGG	0.54119	0.00672106	0.190966	0.0108965	0	0	0	0
ANAPC16	0.0105484	LGG	0.602025	0.0488982	LGG	0.589968	0.00210798	LGG	0.594378	0.0128262	0.0702221	0.00428785	1	0	0	0
ANAPC2	3.86377e-20	LGG	0.758907	0.169695	LGG	0.565974	0.0188781	LGG	0.535487	1.07447e-19	0.214871	0.0316427	1	0	0	0
ANAPC4	0.00964094	LGG	0.56557	0.498038	GBM	0.513163	0.211637	LGG	0.543275	0.0117584	0.554708	0.273178	0	0	0	0
ANAPC5	0.00421917	GBM	0.561217	0.587285	GBM	0.500237	0.00178353	LGG	0.563047	0.00525847	0.639588	0.00367471	0	0	0	0
ANAPC7	1.09469e-28	GBM	0.811167	1.10185e-10	GBM	0.700016	0.155549	GBM	0.530293	4.60989e-28	6.36116e-10	0.208524	1	0	0	0
ANG	4.10396e-68	GBM	0.893384	2.62935e-12	GBM	0.727646	1.07102e-22	GBM	0.725095	1.62074e-66	2.01505e-11	2.69917e-21	1	1	1	1
ANGEL1	1.52876e-30	LGG	0.801897	6.27094e-12	LGG	0.721717	1.35846e-16	LGG	0.67566	7.07087e-30	4.49625e-11	1.63283e-15	1	1	0	0
ANGEL2	8.70836e-27	LGG	0.78796	8.20256e-10	LGG	0.695707	4.29541e-05	LGG	0.593679	3.31098e-26	4.13324e-09	0.000117387	1	1	0	0
ANGPT1	1.26485e-15	GBM	0.715465	0.00785368	GBM	0.576686	6.52755e-08	GBM	0.655824	2.877e-15	0.0132165	2.6684e-07	1	1	0	0
ANGPT2	2.85035e-74	GBM	0.897185	8.3182e-27	GBM	0.825164	3.17509e-35	GBM	0.788218	1.48428e-72	3.20377e-24	5.79929e-33	1	1	1	1
ANGPT4	7.73778e-17	LGG	0.731672	5.6601e-07	LGG	0.701478	3.23117e-05	LGG	0.609259	1.85339e-16	1.82062e-06	8.99396e-05	1	1	0	0
ANGPTL1	0.197724	GBM	0.53377	0.174237	LGG	0.557317	0.248311	GBM	0.516404	0.216917	0.220001	0.314304	0	0	0	0
ANGPTL2	7.42434e-27	LGG	0.768767	4.25165e-06	LGG	0.666851	3.70259e-07	LGG	0.623206	2.835e-26	1.19928e-05	1.36437e-06	1	1	0	0
ANGPTL4	1.43668e-17	GBM	0.753073	1.73235e-10	GBM	0.712665	4.82883e-17	GBM	0.692767	3.5466e-17	9.68816e-10	6.10216e-16	1	1	0	0
ANGPTL5	0.000230397	LGG	0.598211	2.91987e-06	LGG	0.689541	0.165238	LGG	0.57854	0.000309858	8.45281e-06	0.219949	1	0	0	0
ANGPTL6	1.57359e-22	GBM	0.761804	0.0153058	GBM	0.568622	8.59819e-06	GBM	0.625454	4.87428e-22	0.0244322	2.61294e-05	1	1	0	0
ANGPTL7	0.374054	GBM	0.521363	0.188016	GBM	0.56459	0.0419802	GBM	0.561868	0.397709	0.235461	0.0650939	1	0	0	0
ANK1	6.51185e-37	LGG	0.82947	1.05382e-11	LGG	0.716223	3.23123e-17	LGG	0.695477	4.22935e-36	7.31032e-11	4.1514e-16	1	1	0	0
ANK2	1.10996e-27	LGG	0.806488	7.05443e-09	LGG	0.689264	0.0162615	LGG	0.559275	4.44209e-27	3.06035e-08	0.0276679	1	1	0	0
ANK3	3.34231e-44	LGG	0.828855	1.34833e-11	LGG	0.719029	0.000130769	LGG	0.596	3.34288e-43	9.18034e-11	0.00033093	1	1	0	0
ANKAR	4.98067e-08	LGG	0.629046	0.00125937	LGG	0.602182	0.715604	LGG	0.538125	8.07455e-08	0.00242921	0.767774	1	0	0	0
ANKDD1A	0.00288162	LGG	0.582468	0.107009	GBM	0.551664	0.00254313	LGG	0.570136	0.00362963	0.141929	0.0050877	0	0	0	0
ANKDD1B	0.000438589	GBM	0.610266	0.0334602	GBM	0.58641	6.22244e-05	GBM	0.596939	0.000580261	0.0498331	0.000165804	1	1	0	0
ANKEF1	1.54041e-11	GBM	0.691417	6.04358e-05	GBM	0.606807	1.9143e-06	GBM	0.621801	2.93278e-11	0.000143262	6.3799e-06	1	1	0	0
ANKFN1	1.02035e-23	LGG	0.807115	2.16592e-12	LGG	0.731678	2.06788e-06	LGG	0.621094	3.32636e-23	1.68675e-11	6.85308e-06	1	1	0	0
ANKFY1	5.37419e-34	LGG	0.825443	1.45867e-13	LGG	0.742786	0.0278616	LGG	0.560073	2.96934e-33	1.40682e-12	0.0450181	1	1	0	0
ANKH	9.28287e-11	LGG	0.68226	0.435294	LGG	0.518816	0.884203	GBM	0.511708	1.70468e-10	0.49348	0.90793	0	0	0	0
ANKHD1	1.46029e-25	LGG	0.783481	0.19938	GBM	0.536841	0.727437	GBM	0.503912	5.24701e-25	0.247993	0.777979	0	0	0	0
ANKHD1-EIF4EBP3	0.0996658	LGG	0.540958	0.146851	GBM	0.559175	9.4046e-05	GBM	0.590044	0.112479	0.18867	0.000243812	0	0	0	0
ANKIB1	0.000254299	LGG	0.66185	2.95721e-07	LGG	0.674124	0.437873	GBM	0.5017	0.000341121	9.94929e-07	0.511323	0	0	0	0
ANKK1	1.47531e-17	GBM	0.74566	0.162964	GBM	0.557455	2.65406e-07	GBM	0.633532	3.6384e-17	0.207402	9.97283e-07	1	0	0	0
ANKLE1	0.611355	GBM	0.510036	0.701946	GBM	0.506166	0.120296	LGG	0.541144	0.63294	0.744961	0.166169	0	0	0	0
ANKLE2	0.900648	LGG	0.514	8.96663e-15	GBM	0.767966	4.05561e-06	GBM	0.61162	0.90702	1.09258e-13	1.29395e-05	0	0	0	0
ANKMY1	5.19456e-12	LGG	0.695983	0.175575	LGG	0.539371	0.0185592	LGG	0.551878	1.01113e-11	0.221447	0.0311761	1	0	0	0
ANKMY2	6.40673e-08	GBM	0.64435	0.37365	LGG	0.519053	0.213959	GBM	0.519269	1.03437e-07	0.431999	0.275909	0	0	0	0
ANKRA2	1.62329e-08	LGG	0.659479	2.47281e-07	LGG	0.662068	0.0840027	LGG	0.562884	2.69195e-08	8.41219e-07	0.121343	1	0	0	0
ANKRD1	2.68356e-08	GBM	0.669301	0.125434	GBM	0.62503	0.0370161	GBM	0.59668	4.40227e-08	0.163779	0.0581859	1	0	0	0
ANKRD10	0.460142	GBM	0.525754	0.0653791	GBM	0.53858	0.011621	LGG	0.555314	0.483966	0.0912712	0.0203892	0	0	0	0
ANKRD10-IT1	2.4383e-14	LGG	0.700198	0.493596	LGG	0.524824	0.482258	LGG	0.521417	5.23513e-14	0.550175	0.554564	1	0	0	0
ANKRD11	2.53721e-29	LGG	0.865648	0.00224765	GBM	0.607676	0.00305663	GBM	0.573962	1.10047e-28	0.00415544	0.0060205	0	1	0	0
ANKRD12	7.55928e-63	LGG	0.940388	0.770064	LGG	0.521583	0.58937	LGG	0.534708	2.20684e-61	0.805359	0.654744	1	0	0	0
ANKRD13A	7.02358e-20	LGG	0.756586	0.376675	LGG	0.547514	5.42711e-05	LGG	0.602256	1.93006e-19	0.434929	0.000145707	1	0	0	0
ANKRD13B	1.19377e-24	LGG	0.796816	1.31003e-07	LGG	0.678552	1.67385e-17	LGG	0.699239	4.08404e-24	4.67279e-07	2.21145e-16	1	1	0	0
ANKRD13C	7.36095e-10	LGG	0.669251	0.932053	LGG	0.521543	0.0221846	GBM	0.547608	1.30151e-09	0.944429	0.03661	0	0	0	0
ANKRD13D	0.00471957	LGG	0.561907	0.000707239	GBM	0.602577	0.473603	LGG	0.500403	0.00586434	0.00141552	0.545958	0	0	0	0
ANKRD16	3.01414e-50	LGG	0.862361	2.0956e-09	LGG	0.703099	7.93623e-18	LGG	0.699956	4.29448e-49	9.86391e-09	1.08325e-16	1	1	0	0
ANKRD17	1.4887e-12	LGG	0.705492	0.0723725	LGG	0.592774	0.570408	LGG	0.52159	2.96113e-12	0.0999629	0.637356	1	0	0	0
ANKRD18B	1.35286e-17	LGG	0.708051	2.76914e-05	LGG	0.620642	0.00163492	LGG	0.607133	3.34343e-17	6.88476e-05	0.00339855	1	1	0	0
ANKRD18CP	2.37646e-20	LGG	0.750263	0.00384136	LGG	0.666377	0.00159735	LGG	0.575177	6.67915e-20	0.00682074	0.00332748	1	1	0	0
ANKRD18DP	2.66103e-05	LGG	0.621067	0.853337	LGG	0.556882	0.0483315	LGG	0.517111	3.77129e-05	0.877618	0.0738524	1	0	0	0
ANKRD18EP	1.04915e-23	LGG	0.805208	8.24747e-07	LGG	0.663333	0.0465335	LGG	0.532695	3.41835e-23	2.59171e-06	0.0713486	1	0	0	0
ANKRD19P	1.318e-32	LGG	0.803716	4.5257e-06	LGG	0.670013	5.94364e-14	LGG	0.684032	6.76949e-32	1.27071e-05	5.14177e-13	1	1	0	0
ANKRD2	6.49128e-19	LGG	0.740002	0.113766	LGG	0.597083	0.00137845	LGG	0.587116	1.70016e-18	0.149981	0.00291431	1	0	0	0
ANKRD20A1	0.0277503	LGG	0.547029	0.287798	GBM	0.517156	0.769884	LGG	0.502774	0.0327567	0.343453	0.813796	0	0	0	0
ANKRD20A2	0.715288	LGG	0.502722	0.227177	GBM	0.507333	0.0279311	LGG	0.552766	0.732973	0.278039	0.045114	0	0	0	0
ANKRD20A3	1.43256e-06	GBM	0.620703	0.476834	GBM	0.504506	0.779015	LGG	0.514038	2.16145e-06	0.533775	0.821291	0	0	0	0
ANKRD20A4	0.0336607	LGG	0.563224	0.919915	LGG	0.530635	0.963357	LGG	0.514029	0.0394642	0.934419	0.971466	1	0	0	0
ANKRD20A5P	9.63182e-38	LGG	0.807862	0.00083528	LGG	0.644913	1.03055e-06	LGG	0.64121	6.55476e-37	0.00165256	3.57025e-06	1	1	0	0
ANKRD20A7P	1.12425e-05	LGG	0.623212	0.694882	GBM	0.5134	0.376322	LGG	0.553392	1.62503e-05	0.738836	0.450321	0	0	0	0
ANKRD22	9.65865e-14	GBM	0.660294	0.000605947	GBM	0.622223	1.65154e-05	GBM	0.610804	2.01876e-13	0.00122917	4.79913e-05	1	1	0	0
ANKRD23	1.87385e-12	LGG	0.69498	1.61121e-05	LGG	0.647442	2.03304e-06	LGG	0.613216	3.71133e-12	4.15513e-05	6.74394e-06	1	1	0	0
ANKRD24	5.80409e-36	LGG	0.845978	5.83717e-08	LGG	0.696182	1.4217e-09	LGG	0.631673	3.57127e-35	2.20036e-07	7.18435e-09	1	1	0	0
ANKRD26	1.1743e-81	LGG	0.954614	1.43952e-11	LGG	0.726658	1.58546e-06	LGG	0.628401	8.85896e-80	9.76417e-11	5.35242e-06	1	1	0	0
ANKRD26P1	0.00088811	GBM	0.595884	0.378714	LGG	0.520476	0.301831	GBM	0.547871	0.00115516	0.436799	0.372089	0	0	0	0
ANKRD27	3.214e-05	LGG	0.606001	0.00894801	GBM	0.574868	0.00999671	GBM	0.549702	4.53096e-05	0.0148982	0.0177787	0	1	0	0
ANKRD28	9.37557e-43	LGG	0.870703	4.50875e-05	LGG	0.636295	0.000332859	LGG	0.588358	8.62015e-42	0.00010886	0.00078296	1	1	0	0
ANKRD29	0.00955929	LGG	0.56828	1.02893e-06	LGG	0.651514	0.000722831	LGG	0.581341	0.0116613	3.18586e-06	0.00160854	1	1	0	0
ANKRD30B	5.1178e-08	LGG	0.61472	0.039563	LGG	0.611076	0.108241	LGG	0.585103	8.29229e-08	0.0579719	0.151465	1	0	0	0
ANKRD30BL	1.84159e-10	LGG	0.685546	0.00149147	LGG	0.653925	1.84995e-06	LGG	0.649787	3.34014e-10	0.00283951	6.17358e-06	1	1	0	0
ANKRD31	7.36059e-25	LGG	0.787452	2.47422e-05	LGG	0.656771	0.000339627	LGG	0.632829	2.54378e-24	6.19761e-05	0.00079761	1	1	0	0
ANKRD33	4.11538e-06	GBM	0.623005	0.247833	LGG	0.556763	0.964002	LGG	0.524881	6.07736e-06	0.301012	0.971901	0	0	0	0
ANKRD33B	1.72058e-16	LGG	0.682159	6.15063e-07	LGG	0.673907	0.379853	LGG	0.502933	4.05356e-16	1.96733e-06	0.453829	1	0	0	0
ANKRD34A	0.00110747	LGG	0.546942	0.000175231	LGG	0.595344	0.000271484	LGG	0.587578	0.00143204	0.000386958	0.000649282	1	1	0	0
ANKRD34B	0.309113	GBM	0.526413	0.404898	LGG	0.578484	0.21024	GBM	0.531054	0.332021	0.46345	0.271607	0	0	0	0
ANKRD34C	9.47645e-22	LGG	0.711118	0.000303546	LGG	0.699423	0.0175606	LGG	0.612418	2.82915e-21	0.000646308	0.0296588	1	1	0	0
ANKRD35	2.27057e-08	GBM	0.615598	0.000258432	GBM	0.612657	3.08796e-09	GBM	0.639483	3.73729e-08	0.00055566	1.49194e-08	1	1	0	0
ANKRD36	1.40104e-35	LGG	0.840572	4.91707e-05	LGG	0.642857	6.13829e-10	LGG	0.659396	8.43827e-35	0.000117883	3.2541e-09	1	1	0	0
ANKRD36B	5.00863e-22	LGG	0.7606	0.0164463	LGG	0.573603	0.033296	LGG	0.58475	1.51452e-21	0.0260625	0.0528778	1	0	0	0
ANKRD36BP2	0.00143202	LGG	0.588401	0.0177984	LGG	0.580678	0.83527	LGG	0.515833	0.00183744	0.0279837	0.867641	1	0	0	0
ANKRD36C	3.71036e-62	LGG	0.918021	2.4143e-14	LGG	0.743537	0.000110694	LGG	0.615763	1.04464e-60	2.6885e-13	0.000283077	1	1	0	0
ANKRD37	1.41493e-06	GBM	0.640486	0.0136912	LGG	0.586291	0.547693	GBM	0.501111	2.13558e-06	0.0220696	0.616289	0	0	0	0
ANKRD39	4.81488e-05	LGG	0.606428	0.20938	LGG	0.538857	0.00667215	LGG	0.556429	6.72552e-05	0.259013	0.0122714	1	0	0	0
ANKRD40	3.74468e-22	LGG	0.747391	1.0177e-10	LGG	0.72065	0.0147606	LGG	0.570462	1.13994e-21	5.90586e-10	0.0253528	1	1	0	0
ANKRD42	0.00514046	LGG	0.560427	0.000423488	GBM	0.617598	6.3114e-05	GBM	0.600306	0.00637206	0.000881454	0.000167972	0	1	0	0
ANKRD44	2.54641e-38	LGG	0.842227	6.6481e-07	LGG	0.663254	0.00811578	LGG	0.561741	1.79807e-37	2.11728e-06	0.0146932	1	1	0	0
ANKRD45	2.87566e-10	GBM	0.678948	0.00304425	GBM	0.592063	1.79145e-08	GBM	0.642534	5.17843e-10	0.00549965	7.87375e-08	1	1	0	0
ANKRD46	5.63677e-33	LGG	0.837147	4.38364e-24	LGG	0.817733	1.16394e-25	LGG	0.74483	2.9527e-32	4.93033e-22	4.6133e-24	1	1	1	1
ANKRD49	1.45871e-14	GBM	0.711564	0.214176	LGG	0.522057	0.0411991	GBM	0.539458	3.16075e-14	0.264258	0.0640397	0	0	0	0
ANKRD50	9.74976e-13	LGG	0.689059	0.238268	LGG	0.537197	0.931606	GBM	0.503549	1.95805e-12	0.290309	0.946113	0	0	0	0
ANKRD52	0.417308	LGG	0.510813	0.000478613	GBM	0.629931	5.33084e-06	GBM	0.611756	0.4412	0.000986572	1.66867e-05	0	0	0	0
ANKRD53	4.7363e-37	GBM	0.85432	0.000187995	GBM	0.629892	3.39031e-14	GBM	0.685682	3.09781e-36	0.000413034	3.01688e-13	1	1	0	0
ANKRD54	0.00578284	GBM	0.582229	0.334736	LGG	0.546209	0.19231	LGG	0.522542	0.00714527	0.391893	0.251376	0	0	0	0
ANKRD55	9.13063e-18	LGG	0.672086	2.39036e-08	LGG	0.667167	7.89222e-10	LGG	0.652615	2.27853e-17	9.51899e-08	4.12833e-09	1	1	0	0
ANKRD6	3.23943e-17	LGG	0.739111	1.7046e-08	LGG	0.677563	2.29408e-13	LGG	0.680084	7.86382e-17	6.95702e-08	1.85759e-12	1	1	0	0
ANKRD61	0.00747136	GBM	0.573511	0.0936196	LGG	0.542157	0.490478	GBM	0.535886	0.00917701	0.125942	0.562177	0	0	0	0
ANKRD63	0.00140979	LGG	0.56855	6.68164e-05	LGG	0.636098	0.30495	LGG	0.534508	0.00181049	0.000157209	0.375481	1	0	0	0
ANKRD65	0.409547	GBM	0.532503	0.764431	GBM	0.509487	0.0178432	GBM	0.554108	0.433411	0.800297	0.030096	1	0	0	0
ANKRD66	0.296017	GBM	0.505131	0.093437	GBM	0.513361	0.0907354	GBM	0.514836	0.318711	0.125744	0.129883	1	0	0	0
ANKRD7	0.000896016	GBM	0.61403	0.081223	GBM	0.550162	0.183104	GBM	0.538443	0.0011651	0.110771	0.2408	1	0	0	0
ANKRD9	0.0261644	LGG	0.568581	0.132987	LGG	0.539964	0.357398	GBM	0.533638	0.0309426	0.172458	0.430925	0	0	0	0
ANKS1A	4.45953e-37	LGG	0.881529	1.60184e-06	LGG	0.674638	5.20188e-09	LGG	0.626134	2.92329e-36	4.82977e-06	2.44396e-08	1	1	0	0
ANKS1B	5.68378e-31	LGG	0.827425	1.10073e-13	LGG	0.745316	3.70603e-09	LGG	0.644012	2.68206e-30	1.08583e-12	1.77219e-08	1	1	0	0
ANKS3	3.17877e-14	LGG	0.692609	0.719109	GBM	0.531465	0.0174562	LGG	0.54681	6.78371e-14	0.759944	0.0295191	0	0	0	0
ANKS6	5.64667e-07	LGG	0.630037	0.317245	LGG	0.557673	0.000711308	LGG	0.573101	8.70574e-07	0.373787	0.00158472	1	0	0	0
ANKUB1	3.2191e-21	GBM	0.762131	0.490347	GBM	0.54783	2.10855e-06	GBM	0.619888	9.38665e-21	0.547174	6.98396e-06	1	0	0	0
ANKZF1	7.50635e-11	LGG	0.663706	0.903693	LGG	0.532611	0.000178965	LGG	0.595755	1.38463e-10	0.920422	0.000442467	1	0	0	0
ANLN	0.000862343	LGG	0.586557	0.00476447	LGG	0.594118	0.0252879	GBM	0.54895	0.00112264	0.00832466	0.0412813	0	1	0	0
ANO1	7.32307e-11	GBM	0.683802	7.95354e-09	GBM	0.689027	7.68176e-06	GBM	0.619997	1.35153e-10	3.41441e-08	2.34894e-05	1	1	0	0
ANO10	0.00293916	GBM	0.585654	0.849367	GBM	0.522373	0.0186511	GBM	0.558541	0.00370052	0.874339	0.0313066	1	0	0	0
ANO2	8.55253e-05	LGG	0.614519	0.0599239	LGG	0.556526	0.236306	GBM	0.523231	0.000117859	0.0844271	0.300684	0	0	0	0
ANO3	2.02801e-18	LGG	0.715741	2.39233e-07	LGG	0.671911	8.17953e-05	LGG	0.646333	5.21416e-18	8.1635e-07	0.000214089	1	1	0	0
ANO4	8.78979e-21	LGG	0.757953	1.13071e-07	LGG	0.682584	0.00344804	LGG	0.589763	2.51403e-20	4.06922e-07	0.00672342	1	1	0	0
ANO5	7.96786e-17	LGG	0.738647	2.1492e-12	LGG	0.722666	1.81577e-05	LGG	0.614159	1.90799e-16	1.67447e-11	5.24709e-05	1	1	0	0
ANO6	3.9313e-23	GBM	0.736126	5.54154e-08	GBM	0.682109	4.20882e-12	GBM	0.660411	1.24886e-22	2.09561e-07	2.95669e-11	1	1	0	0
ANO7	6.54288e-11	GBM	0.667093	0.0511651	LGG	0.554589	0.129222	GBM	0.556837	1.21071e-10	0.0731809	0.176886	0	0	0	0
ANO8	5.69512e-20	LGG	0.743715	3.69869e-11	LGG	0.719108	3.08164e-07	LGG	0.620749	1.56989e-19	2.30704e-10	1.14797e-06	1	1	0	0
ANO9	2.3617e-08	GBM	0.659196	0.00985477	GBM	0.598624	0.000173268	GBM	0.619807	3.88366e-08	0.0162794	0.000429462	1	1	0	0
ANP32A	1.85468e-11	LGG	0.686964	0.00830957	GBM	0.572535	0.939028	LGG	0.501301	3.51862e-11	0.0139176	0.952359	0	0	0	0
ANP32B	0.274901	LGG	0.525353	0.0316124	GBM	0.570322	0.124437	LGG	0.511799	0.296955	0.0472838	0.171208	0	0	0	0
ANP32E	2.63951e-06	LGG	0.616213	0.0305414	GBM	0.58554	0.223098	GBM	0.53129	3.93673e-06	0.0457979	0.285946	0	0	0	0
ANPEP	4.65983e-38	GBM	0.892092	3.54296e-15	GBM	0.765278	7.82996e-21	GBM	0.743384	3.23986e-37	4.66016e-14	1.51445e-19	1	1	1	1
ANTXR1	8.02536e-18	LGG	0.744368	0.00984642	LGG	0.610918	0.00058585	LGG	0.58417	2.0081e-17	0.0162717	0.0013221	1	1	0	0
ANTXR2	4.06762e-30	GBM	0.800554	4.13987e-11	GBM	0.709107	2.72457e-15	GBM	0.691189	1.84164e-29	2.56276e-10	2.79509e-14	1	1	0	0
ANXA1	3.25364e-80	GBM	0.891578	2.75997e-24	GBM	0.799194	1.43344e-43	GBM	0.801209	2.29746e-78	3.30394e-22	1.10418e-40	1	1	1	1
ANXA11	0.456082	LGG	0.526908	0.0119959	GBM	0.583683	0.402481	GBM	0.522306	0.479924	0.0195359	0.476687	0	0	0	0
ANXA13	0.0627334	GBM	0.539892	0.708548	GBM	0.539924	0.026736	GBM	0.544317	0.0721314	0.750484	0.0433616	1	0	0	0
ANXA2	4.83025e-89	GBM	0.946535	3.69923e-26	GBM	0.816231	1.65492e-46	GBM	0.81488	4.8448e-87	9.99207e-24	2.44336e-43	1	1	1	1
ANXA2P2	1.61784e-135	GBM	0.986314	4.86765e-11	GBM	0.740889	7.987e-27	GBM	0.780857	5.82853e-133	2.98719e-10	3.9015e-25	1	1	1	1
ANXA2R	1.75692e-30	GBM	0.81468	3.81416e-07	GBM	0.678314	9.13193e-09	GBM	0.623732	8.10212e-30	1.25839e-06	4.1602e-08	1	1	0	0
ANXA3	6.46707e-18	LGG	0.729527	1.76266e-08	LGG	0.69045	1.89477e-05	LGG	0.623705	1.62556e-17	7.17248e-08	5.46115e-05	1	1	0	0
ANXA4	9.90278e-16	GBM	0.730255	0.0370005	GBM	0.577397	4.91161e-06	GBM	0.602446	2.26384e-15	0.0545826	1.54563e-05	1	0	0	0
ANXA5	6.39689e-58	GBM	0.891113	1.6294e-18	GBM	0.781722	4.65247e-25	GBM	0.737777	1.40453e-56	4.20817e-17	1.66521e-23	1	1	1	1
ANXA6	2.28269e-10	LGG	0.661436	0.416421	GBM	0.53016	0.160065	LGG	0.522415	4.1283e-10	0.47491	0.213802	0	0	0	0
ANXA7	1.97755e-13	LGG	0.719479	8.08728e-12	LGG	0.73239	1.29288e-06	LGG	0.62288	4.08827e-13	5.70391e-11	4.41178e-06	1	1	0	0
ANXA9	3.47256e-38	LGG	0.847182	3.86773e-05	LGG	0.656692	0.685077	LGG	0.524826	2.43451e-37	9.42306e-05	0.741448	1	0	0	0
AOAH	0.0151487	GBM	0.562008	0.216755	GBM	0.537236	0.613845	LGG	0.519958	0.0182129	0.266944	0.6768	0	0	0	0
AOC1	9.73397e-14	GBM	0.70765	0.160182	LGG	0.555498	0.894366	GBM	0.565689	2.03378e-13	0.204316	0.916347	0	0	0	0
AOC2	3.68538e-09	LGG	0.654887	0.0251687	LGG	0.571666	0.23807	LGG	0.519015	6.30102e-09	0.038421	0.302705	1	0	0	0
AOC3	0.244081	GBM	0.550015	0.00267163	GBM	0.599415	0.0367368	GBM	0.574927	0.265024	0.00487119	0.0577983	1	0	0	0
AOX1	2.76435e-42	GBM	0.845062	1.20912e-06	GBM	0.672583	1.58664e-12	GBM	0.710136	2.46585e-41	3.70828e-06	1.17225e-11	1	1	0	0
AP1AR	1.27632e-05	LGG	0.622585	0.00154306	LGG	0.585778	0.520061	LGG	0.519632	1.8385e-05	0.0029311	0.590673	1	0	0	0
AP1B1	1.17255e-09	LGG	0.666504	0.272061	LGG	0.538975	0.334326	LGG	0.51761	2.05409e-09	0.326587	0.406343	1	0	0	0
AP1G1	2.83296e-20	LGG	0.761867	0.000926875	LGG	0.601036	0.275134	LGG	0.524391	7.92555e-20	0.00182379	0.343932	1	0	0	0
AP1G2	0.00813265	LGG	0.584362	0.752369	GBM	0.504743	0.00592821	LGG	0.573771	0.00996499	0.789535	0.0110117	0	0	0	0
AP1M1	3.36024e-06	GBM	0.641879	5.86134e-10	GBM	0.713456	0.00454192	GBM	0.573028	4.98431e-06	3.01788e-09	0.0086467	1	1	0	0
AP1M2	1.78024e-11	LGG	0.694823	0.0236813	LGG	0.550439	0.0592503	LGG	0.569783	3.37993e-11	0.0363697	0.0887203	1	0	0	0
AP1S1	3.58799e-28	GBM	0.793417	0.200557	GBM	0.56546	0.135698	GBM	0.533312	1.47026e-27	0.249159	0.184822	1	0	0	0
AP1S2	6.37353e-41	GBM	0.871055	9.70473e-08	GBM	0.674283	9.47411e-12	GBM	0.668743	5.25511e-40	3.53057e-07	6.36771e-11	1	1	0	0
AP1S3	1.18274e-43	GBM	0.831276	4.66453e-05	GBM	0.627125	7.82378e-07	GBM	0.621076	1.14405e-42	0.00011233	2.75465e-06	1	1	0	0
AP2A1	0.0149592	LGG	0.540193	0.136965	GBM	0.561586	0.804867	LGG	0.510122	0.0179924	0.177099	0.842962	0	0	0	0
AP2A2	3.13769e-08	LGG	0.637614	0.337734	GBM	0.543798	0.465042	LGG	0.501428	5.12915e-08	0.394985	0.537733	0	0	0	0
AP2B1	1.2833e-59	LGG	0.906067	1.72288e-18	LGG	0.795834	1.64396e-21	LGG	0.723018	3.1161e-58	4.4174e-17	3.48815e-20	1	1	1	1
AP2M1	0.0589926	GBM	0.579645	0.0405563	GBM	0.597557	0.641663	GBM	0.520574	0.0679718	0.0592803	0.701966	1	0	0	0
AP2S1	2.74529e-62	GBM	0.919188	2.23265e-18	GBM	0.777334	0.0199735	GBM	0.571623	7.79142e-61	5.5897e-17	0.033296	1	1	0	0
AP3B1	0.233235	GBM	0.543943	2.05556e-09	GBM	0.703376	2.14749e-05	GBM	0.619453	0.253747	9.68832e-09	6.13861e-05	1	0	0	0
AP3B2	1.12012e-29	LGG	0.803941	8.59325e-09	LGG	0.688118	1.03093e-14	LGG	0.678307	4.95202e-29	3.67036e-08	9.80933e-14	1	1	0	0
AP3D1	1.52679e-08	LGG	0.664885	0.0036766	GBM	0.607716	0.78754	GBM	0.503042	2.53526e-08	0.00654723	0.828013	0	0	0	0
AP3M1	8.98286e-18	LGG	0.723569	8.10911e-05	LGG	0.647363	0.00106747	LGG	0.580235	2.2426e-17	0.000188493	0.00230105	1	1	0	0
AP3M2	4.34393e-15	LGG	0.713696	5.73171e-08	LGG	0.670725	0.000188327	LGG	0.590135	9.65057e-15	2.16245e-07	0.000464111	1	1	0	0
AP3S1	2.16533e-24	GBM	0.790042	4.84187e-05	GBM	0.632382	0.225432	GBM	0.580616	7.31711e-24	0.000116222	0.288541	1	0	0	0
AP3S2	8.42085e-35	LGG	0.843294	2.87502e-09	LGG	0.694482	0.00218034	LGG	0.594459	4.8659e-34	1.3251e-08	0.00442031	1	1	0	0
AP4B1	2.8621e-25	GBM	0.762281	3.89614e-09	GBM	0.68796	0.822163	LGG	0.516595	1.01333e-24	1.76361e-08	0.856939	0	0	0	0
AP4B1-AS1	0.0773157	GBM	0.542005	0.429543	GBM	0.517452	0.312084	GBM	0.519133	0.0880835	0.487959	0.382723	1	0	0	0
AP4E1	8.00522e-13	LGG	0.704263	0.776813	GBM	0.507985	0.0821656	GBM	0.538425	1.61357e-12	0.811371	0.119039	0	0	0	0
AP4M1	2.92614e-40	GBM	0.846179	1.15558e-05	GBM	0.650407	0.325442	GBM	0.531326	2.32054e-39	3.04574e-05	0.396852	1	0	0	0
AP4S1	1.26709e-09	LGG	0.66471	1.95918e-09	LGG	0.700846	4.76136e-07	LGG	0.619244	2.21487e-09	9.27599e-09	1.72863e-06	1	1	0	0
AP5B1	4.51337e-08	LGG	0.640662	0.207227	LGG	0.535339	0.0431281	GBM	0.549856	7.33044e-08	0.25669	0.0666521	0	0	0	0
AP5M1	1.33709e-22	LGG	0.763435	3.09536e-11	LGG	0.70887	0.036624	LGG	0.553347	4.15485e-22	1.96139e-10	0.057631	1	0	0	0
AP5S1	1.32247e-21	GBM	0.767575	0.00624318	GBM	0.600008	3.05768e-07	GBM	0.621438	3.91638e-21	0.0106994	1.13928e-06	1	1	0	0
AP5Z1	1.18851e-10	GBM	0.692822	1.96666e-18	GBM	0.780496	0.000189356	GBM	0.616072	2.17328e-10	4.99187e-17	0.000466465	1	1	0	0
APAF1	5.70659e-08	LGG	0.6654	0.000584518	LGG	0.60657	0.203919	LGG	0.525361	9.22682e-08	0.00118869	0.264599	1	0	0	0
APBA1	9.35555e-36	LGG	0.852238	1.85578e-11	LGG	0.719504	8.82044e-10	LGG	0.655824	5.68514e-35	1.22866e-10	4.5841e-09	1	1	0	0
APBA2	2.13406e-31	LGG	0.846982	3.08863e-08	LGG	0.698514	1.01443e-14	LGG	0.677437	1.02706e-30	1.21226e-07	9.66271e-14	1	1	0	0
APBA3	2.2914e-22	GBM	0.743765	7.89128e-06	GBM	0.648194	0.0954254	GBM	0.542976	7.04214e-22	2.13678e-05	0.135839	1	0	0	0
APBB1	4.49504e-52	LGG	0.885569	1.05205e-14	LGG	0.751166	2.27982e-12	LGG	0.662524	7.05341e-51	1.26075e-13	1.65268e-11	1	1	0	0
APBB1IP	1.46362e-07	GBM	0.625031	0.0542629	GBM	0.572022	0.0262941	GBM	0.544979	2.32621e-07	0.0771942	0.0427349	1	0	0	0
APBB2	2.88359e-22	LGG	0.770611	7.10501e-09	LGG	0.69298	2.51703e-08	LGG	0.623487	8.81606e-22	3.08075e-08	1.08002e-07	1	1	0	0
APBB3	0.00682941	LGG	0.568405	0.530722	LGG	0.537157	0.381807	LGG	0.514736	0.00840546	0.585954	0.45562	1	0	0	0
APC	2.17549e-46	LGG	0.884829	4.33169e-20	LGG	0.792988	0.00051838	LGG	0.584768	2.44299e-45	1.55985e-18	0.00117776	1	1	0	0
APC2	2.60768e-34	LGG	0.896959	9.775e-18	LGG	0.775674	3.6062e-14	LGG	0.684988	1.46277e-33	2.1594e-16	3.19615e-13	1	1	0	0
APCDD1	1.09481e-12	LGG	0.704049	2.95643e-10	LGG	0.707052	2.05218e-09	LGG	0.628555	2.19149e-12	1.59401e-09	1.01418e-08	1	1	0	0
APCDD1L	2.99494e-29	GBM	0.843181	2.13925e-05	GBM	0.686576	4.02175e-06	GBM	0.675111	1.29329e-28	5.41057e-05	1.28384e-05	1	1	0	0
APCDD1L-AS1	2.83593e-17	GBM	0.781368	2.76264e-06	GBM	0.710807	1.154e-08	GBM	0.666349	6.9071e-17	8.02782e-06	5.19446e-08	1	1	0	0
APEH	2.31859e-10	GBM	0.683677	0.479293	LGG	0.511187	0.13265	LGG	0.526376	4.19194e-10	0.536292	0.181088	0	0	0	0
APEX1	0.857912	LGG	0.502032	0.446744	GBM	0.519606	0.000560698	LGG	0.58038	0.867296	0.504523	0.00126918	0	0	0	0
APEX2	1.07522e-32	GBM	0.839593	3.61568e-16	GBM	0.760297	1.25414e-15	GBM	0.681135	5.54345e-32	5.7452e-15	1.32338e-14	1	1	0	0
APH1A	4.92706e-42	GBM	0.873576	1.14993e-07	GBM	0.671832	0.00275267	GBM	0.583653	4.32939e-41	4.13252e-07	0.00546616	1	1	0	0
APH1B	2.17693e-14	LGG	0.710673	1.74117e-10	LGG	0.709068	0.000251456	LGG	0.607242	4.68024e-14	9.73133e-10	0.000605224	1	1	0	0
API5	0.0668892	GBM	0.562459	0.00555287	LGG	0.581153	0.302273	LGG	0.535043	0.0766551	0.0096037	0.372548	0	0	0	0
APIP	1.91498e-06	GBM	0.624831	0.25204	GBM	0.569334	0.545399	GBM	0.520946	2.87312e-06	0.305535	0.614411	1	0	0	0
APLF	2.6538e-11	GBM	0.696209	0.0380779	GBM	0.560558	0.00320454	GBM	0.631202	4.996e-11	0.0560041	0.00629083	1	0	0	0
APLN	1.18588e-31	GBM	0.810465	8.87926e-11	GBM	0.714365	1.73641e-18	GBM	0.706419	5.79256e-31	5.1953e-10	2.54458e-17	1	1	1	1
APLNR	0.000205322	GBM	0.588038	0.686737	LGG	0.511819	0.0625649	GBM	0.551261	0.000276725	0.731361	0.0931951	0	0	0	0
APLP1	1.54598e-13	LGG	0.695318	0.00175402	LGG	0.602933	0.00148247	LGG	0.573209	3.20732e-13	0.00330244	0.00310975	1	1	0	0
APLP2	0.0987008	GBM	0.558056	0.0011328	GBM	0.600996	1.29685e-06	GBM	0.598294	0.111426	0.00219871	4.42361e-06	1	0	0	0
APMAP	1.66463e-05	GBM	0.617781	0.0722882	GBM	0.55032	0.619172	GBM	0.513685	2.3821e-05	0.0998542	0.681655	1	0	0	0
APOA1	5.79286e-06	GBM	0.631699	0.615158	LGG	0.504724	0.863468	GBM	0.542663	8.48501e-06	0.665739	0.890198	0	0	0	0
APOB	0.390693	GBM	0.521815	0.0217316	LGG	0.602617	0.504031	GBM	0.575177	0.414452	0.0336173	0.575196	0	0	0	0
APOBEC2	8.0212e-16	LGG	0.730807	0.0734978	LGG	0.559333	0.000242791	LGG	0.56539	1.83894e-15	0.101335	0.000586438	1	0	0	0
APOBEC3A	4.45152e-25	GBM	0.781656	0.00953694	GBM	0.545695	0.0264551	GBM	0.571623	1.55918e-24	0.0158045	0.042965	1	1	0	0
APOBEC3B	6.38562e-55	GBM	0.890486	2.0019e-08	GBM	0.680548	5.67292e-18	GBM	0.702848	1.19034e-53	8.0755e-08	7.90771e-17	1	1	0	0
APOBEC3C	1.47605e-56	GBM	0.885682	1.15819e-14	GBM	0.748834	5.98899e-24	GBM	0.737188	2.98132e-55	1.3818e-13	1.79538e-22	1	1	1	1
APOBEC3D	1.15918e-56	GBM	0.889934	1.57938e-12	GBM	0.735236	5.54722e-17	GBM	0.731395	2.35478e-55	1.27017e-11	6.96528e-16	1	1	1	1
APOBEC3F	7.66378e-60	GBM	0.891063	1.28874e-11	GBM	0.711993	6.68605e-22	GBM	0.734641	1.88424e-58	8.81228e-11	1.51093e-20	1	1	1	1
APOBEC3G	2.96469e-54	GBM	0.883185	1.51017e-13	GBM	0.734485	7.65543e-31	GBM	0.762481	5.2811e-53	1.45332e-12	6.48954e-29	1	1	1	1
APOBEC3H	1.93262e-07	GBM	0.642895	0.00859804	GBM	0.586015	3.70298e-08	GBM	0.625046	3.05349e-07	0.0143587	1.55611e-07	1	1	0	0
APOBR	6.94177e-07	GBM	0.641803	2.25419e-12	GBM	0.730493	3.59494e-20	GBM	0.720471	1.06494e-06	1.75088e-11	6.42052e-19	1	1	0	0
APOC1	1.93362e-14	GBM	0.702895	0.00123255	GBM	0.5923	0.0776512	GBM	0.539902	4.16931e-14	0.00238163	0.113174	1	0	0	0
APOC1P1	0.000611193	GBM	0.578002	0.306281	LGG	0.528105	0.00417679	LGG	0.559983	0.000802484	0.362701	0.00800695	0	0	0	0
APOC2	7.97683e-47	GBM	0.861722	1.52762e-05	GBM	0.65685	4.44048e-10	GBM	0.63481	9.19758e-46	3.94876e-05	2.3927e-09	1	1	0	0
APOC4	0.0402537	LGG	0.542902	0.0338408	GBM	0.564946	0.677245	GBM	0.534277	0.0469209	0.0503364	0.734453	0	0	0	0
APOC4-APOC2	6.16847e-18	GBM	0.727583	0.975677	LGG	0.515555	0.253819	LGG	0.548279	1.5525e-17	0.980992	0.320475	0	0	0	0
APOD	8.26747e-09	LGG	0.669276	1.06263e-05	LGG	0.656257	3.08471e-08	LGG	0.621941	1.38956e-08	2.81603e-05	1.30761e-07	1	1	0	0
APOE	1.28993e-14	LGG	0.705479	0.0810867	LGG	0.563286	1.963e-06	LGG	0.602709	2.80158e-14	0.110602	6.52748e-06	1	0	0	0
APOL1	8.43944e-20	GBM	0.763711	1.38361e-08	GBM	0.694245	9.69371e-17	GBM	0.702875	2.30979e-19	5.72879e-08	1.18607e-15	1	1	0	0
APOL2	0.00103913	GBM	0.606127	9.34145e-06	GBM	0.674559	5.75047e-16	GBM	0.694906	0.00134564	2.49777e-05	6.37155e-15	1	1	0	0
APOL3	0.925253	GBM	0.505068	0.637083	LGG	0.502609	0.0144198	GBM	0.559828	0.930366	0.686152	0.0248106	0	0	0	0
APOL4	5.95043e-51	GBM	0.861195	1.94771e-10	GBM	0.716618	4.13203e-26	GBM	0.756407	8.81973e-50	1.08107e-09	1.76403e-24	1	1	1	1
APOL6	2.02722e-06	GBM	0.641352	0.00101926	GBM	0.620128	3.79485e-14	GBM	0.677672	3.03919e-06	0.00199164	3.35496e-13	1	1	0	0
APOLD1	8.64867e-12	LGG	0.682398	0.0687268	LGG	0.55787	0.765466	LGG	0.505	1.6644e-11	0.0954438	0.810141	1	0	0	0
APOM	5.13486e-05	LGG	0.629171	5.5872e-06	LGG	0.652502	2.62692e-08	LGG	0.613424	7.16057e-05	1.54718e-05	1.12527e-07	1	1	0	0
APOO	1.42402e-17	GBM	0.724823	0.0279803	GBM	0.579848	0.256067	LGG	0.503005	3.51584e-17	0.0423228	0.323053	0	0	0	0
APOOL	4.76237e-06	LGG	0.667419	0.000104144	LGG	0.626532	0.415658	GBM	0.533402	7.00818e-06	0.000238202	0.489446	0	0	0	0
APOPT1	1.4874e-10	GBM	0.692697	0.0708006	GBM	0.571745	0.87625	LGG	0.505734	2.71084e-10	0.0979597	0.901226	0	0	0	0
APP	0.000165866	LGG	0.596254	0.0640124	LGG	0.563879	0.830612	LGG	0.503413	0.000224838	0.0896032	0.863815	1	0	0	0
APPBP2	1.87568e-22	LGG	0.777987	7.4673e-10	LGG	0.707171	0.206647	LGG	0.543592	5.79174e-22	3.78319e-09	0.26757	1	0	0	0
APPL1	6.55018e-37	LGG	0.830925	5.75846e-10	LGG	0.726421	0.0426897	LGG	0.55603	4.25268e-36	2.9675e-09	0.0660438	1	0	0	0
APPL2	3.65848e-24	LGG	0.77125	2.6855e-08	LGG	0.688355	1.04905e-08	LGG	0.633949	1.2197e-23	1.06251e-07	4.74739e-08	1	1	0	0
APRT	5.20754e-14	GBM	0.724635	0.000508766	GBM	0.605384	0.58807	LGG	0.513476	1.10221e-13	0.00104459	0.653549	0	0	0	0
APTX	0.00797346	GBM	0.584901	0.816346	GBM	0.505969	0.0808425	LGG	0.525823	0.00977265	0.846544	0.117401	0	0	0	0
AQP11	8.58486e-08	LGG	0.657547	1.94824e-13	LGG	0.734801	3.82302e-09	LGG	0.634076	1.37821e-07	1.84189e-12	1.82371e-08	1	1	0	0
AQP3	2.06577e-09	GBM	0.65998	0.00519018	GBM	0.608546	0.000434483	GBM	0.610659	3.57485e-09	0.00900808	0.00100218	1	1	0	0
AQP4	0.0906494	GBM	0.527134	6.25747e-06	LGG	0.655823	0.21424	LGG	0.531154	0.102698	1.72068e-05	0.276191	0	0	0	0
AQP4-AS1	0.040977	LGG	0.561067	4.65877e-06	LGG	0.641513	0.278866	LGG	0.535777	0.0477281	1.30538e-05	0.34791	1	0	0	0
AQP5	4.13008e-51	GBM	0.844222	3.71838e-05	GBM	0.632975	3.95468e-19	GBM	0.713173	6.17343e-50	9.07794e-05	6.24466e-18	1	1	0	0
AQP6	6.33335e-08	LGG	0.629911	3.34173e-11	LGG	0.709661	8.17482e-09	LGG	0.636025	1.02271e-07	2.10172e-10	3.74633e-08	1	1	0	0
AQP7	4.67691e-42	LGG	0.86292	2.03402e-11	LGG	0.729623	3.15678e-07	LGG	0.688397	4.11778e-41	1.33767e-10	1.17349e-06	1	1	0	0
AQP7P1	0.00348829	GBM	0.579131	0.256654	GBM	0.536584	0.257105	GBM	0.514917	0.00437163	0.310555	0.32414	1	0	0	0
AQP7P3	0.10298	GBM	0.528225	0.0422495	GBM	0.575698	0.351785	GBM	0.537518	0.116049	0.0614863	0.424909	1	0	0	0
AQP8	0.0260051	LGG	0.542187	0.702645	GBM	0.508677	0.0030374	LGG	0.561873	0.0307645	0.745569	0.00598595	0	0	0	0
AQP9	3.07919e-44	GBM	0.870302	9.89344e-09	GBM	0.651356	9.85513e-14	GBM	0.696347	3.08847e-43	4.19034e-08	8.28683e-13	1	1	0	0
AQR	2.42592e-21	LGG	0.76045	0.202884	GBM	0.543007	0.023685	GBM	0.532242	7.1102e-21	0.251779	0.0388724	0	0	0	0
AR	0.000147798	GBM	0.569309	0.377503	GBM	0.534904	0.00468566	GBM	0.585403	0.000200853	0.435715	0.00890346	1	0	0	0
ARAF	1.08567e-33	GBM	0.830887	1.04395e-07	GBM	0.676022	0.796977	GBM	0.538823	5.92434e-33	3.77463e-07	0.835802	1	0	0	0
ARAP1	7.46871e-25	LGG	0.804029	0.00195665	GBM	0.586212	0.787884	GBM	0.509496	2.57762e-24	0.00365676	0.828277	0	0	0	0
ARAP1-AS2	2.61649e-16	LGG	0.733203	0.000196321	LGG	0.636849	0.991345	LGG	0.522968	6.10399e-16	0.000429675	0.993082	1	0	0	0
ARAP2	1.08277e-17	LGG	0.750151	1.84236e-07	LGG	0.686734	0.346174	GBM	0.515389	2.68985e-17	6.40777e-07	0.419018	0	0	0	0
ARAP3	9.24869e-58	GBM	0.898327	3.8565e-20	GBM	0.794924	1.23242e-33	GBM	0.783087	2.01813e-56	1.42049e-18	1.65416e-31	1	1	1	1
ARC	3.10406e-15	GBM	0.72535	8.8403e-05	GBM	0.628983	5.18914e-14	GBM	0.676775	6.92918e-15	0.000204336	4.52219e-13	1	1	0	0
ARCN1	0.0388467	GBM	0.562723	0.000593985	GBM	0.616412	1.76367e-06	GBM	0.614122	0.0453395	0.00120725	5.91574e-06	1	1	0	0
AREL1	1.50319e-11	LGG	0.684267	0.0819063	LGG	0.560677	0.967334	LGG	0.51043	2.86439e-11	0.111588	0.974429	1	0	0	0
ARF1	6.42886e-22	GBM	0.78367	4.56451e-09	GBM	0.68369	0.695691	GBM	0.509469	1.93436e-21	2.03973e-08	0.750734	1	0	0	0
ARF3	9.47586e-23	LGG	0.769469	1.78057e-08	LGG	0.689975	0.0119146	LGG	0.555994	2.95857e-22	7.24203e-08	0.020867	1	1	0	0
ARF4	7.92391e-51	GBM	0.935935	4.50635e-12	GBM	0.730572	2.18077e-10	GBM	0.662143	1.16277e-49	3.31557e-11	1.22229e-09	1	1	0	0
ARF5	1.14904e-26	GBM	0.80487	2.35615e-08	GBM	0.673413	0.0713913	GBM	0.543955	4.33977e-26	9.39331e-08	0.104966	1	0	0	0
ARF6	1.87139e-11	GBM	0.690752	2.03842e-14	GBM	0.753261	1.69436e-09	GBM	0.641247	3.54954e-11	2.30176e-13	8.47755e-09	1	1	0	0
ARFGAP1	7.51512e-17	LGG	0.730982	0.209803	GBM	0.520318	0.0274783	LGG	0.54186	1.8003e-16	0.259518	0.0444434	0	0	0	0
ARFGAP2	7.9824e-72	LGG	0.913744	4.83435e-10	LGG	0.715906	1.28316e-10	LGG	0.652134	3.69851e-70	2.51987e-09	7.4293e-10	1	1	0	0
ARFGAP3	0.43557	GBM	0.530897	0.000255448	GBM	0.618745	0.00250376	GBM	0.564443	0.459381	0.000549845	0.00501574	1	0	0	0
ARFGEF1	1.49596e-24	LGG	0.782754	0.761963	LGG	0.501028	0.748927	LGG	0.507864	5.09711e-24	0.79809	0.796586	1	0	0	0
ARFGEF2	1.23004e-36	LGG	0.829909	1.83593e-07	LGG	0.653965	0.839578	GBM	0.50461	7.8645e-36	6.38664e-07	0.871321	0	0	0	0
ARFIP1	4.42512e-20	GBM	0.758304	0.000107325	GBM	0.636849	0.044765	GBM	0.55147	1.22632e-19	0.000244973	0.0688635	1	0	0	0
ARFIP2	0.000123073	GBM	0.603593	0.0268255	GBM	0.592893	0.56702	LGG	0.508807	0.000168015	0.0407303	0.634251	0	0	0	0
ARFRP1	4.72109e-09	LGG	0.648879	0.00097982	GBM	0.611116	0.592144	LGG	0.521272	8.03291e-09	0.00191881	0.657332	0	0	0	0
ARG1	1.01093e-09	GBM	0.665688	0.0700495	GBM	0.510831	0.0209699	GBM	0.549729	1.77642e-09	0.0970691	0.0348	1	0	0	0
ARG2	2.73538e-09	GBM	0.677856	0.223916	GBM	0.540794	0.0316452	GBM	0.547835	4.70686e-09	0.274579	0.0505097	1	0	0	0
ARGLU1	7.29062e-05	LGG	0.611646	0.785258	LGG	0.506522	0.13792	LGG	0.53808	0.0001008	0.818715	0.187488	1	0	0	0
ARHGAP1	0.551265	GBM	0.532227	0.0138882	GBM	0.584987	0.0475838	GBM	0.551996	0.574061	0.0223648	0.0728205	1	0	0	0
ARHGAP10	0.371733	GBM	0.520736	8.4267e-05	GBM	0.635109	0.219128	GBM	0.531716	0.395385	0.000195286	0.281488	1	0	0	0
ARHGAP11A	6.42013e-54	GBM	0.851862	1.12971e-13	GBM	0.738517	1.5328e-17	GBM	0.712557	1.1177e-52	1.11133e-12	2.03116e-16	1	1	1	1
ARHGAP11B	1.23591e-37	GBM	0.830272	6.00226e-13	GBM	0.754684	3.02577e-13	GBM	0.683239	8.3496e-37	5.19502e-12	2.41585e-12	1	1	0	0
ARHGAP12	6.39731e-62	LGG	0.909504	4.69151e-17	LGG	0.778125	8.14023e-15	LGG	0.710608	1.76732e-60	8.8708e-16	7.82106e-14	1	1	1	1
ARHGAP15	1.54106e-28	GBM	0.765141	9.02818e-10	GBM	0.702229	3.22208e-08	GBM	0.629489	6.42522e-28	4.50316e-09	1.36177e-07	1	1	0	0
ARHGAP17	0.94779	GBM	0.51489	7.69222e-07	GBM	0.671002	0.308208	GBM	0.526123	0.951509	2.42669e-06	0.378834	1	0	0	0
ARHGAP18	1.50338e-54	GBM	0.876273	8.94693e-18	GBM	0.768717	8.19611e-27	GBM	0.754114	2.73038e-53	1.99638e-16	3.97837e-25	1	1	1	1
ARHGAP19	1.80036e-19	LGG	0.775955	0.387394	LGG	0.576884	0.60492	LGG	0.537164	4.8529e-19	0.445795	0.668916	1	0	0	0
ARHGAP19-SLIT1	2.36995e-11	LGG	0.678559	0.0787972	LGG	0.592122	0.0092908	LGG	0.644728	4.47261e-11	0.107886	0.0166301	1	0	0	0
ARHGAP20	2.90154e-08	GBM	0.619474	0.2903	LGG	0.523085	0.000706285	GBM	0.584596	4.75191e-08	0.34609	0.00157439	0	0	0	0
ARHGAP21	4.91817e-39	LGG	0.868671	2.77213e-06	LGG	0.654597	8.31248e-06	LGG	0.605673	3.62204e-38	8.05276e-06	2.53059e-05	1	1	0	0
ARHGAP22	7.53985e-30	LGG	0.80832	0.00282827	LGG	0.599257	0.000103383	LGG	0.596762	3.36283e-29	0.00513458	0.000265764	1	1	0	0
ARHGAP23	9.3806e-13	LGG	0.6831	0.000966347	LGG	0.608823	0.903255	GBM	0.508762	1.88584e-12	0.00189431	0.923586	0	0	0	0
ARHGAP23P1	3.5741e-34	GBM	0.86043	0.0127	LGG	0.605068	0.918965	GBM	0.505743	1.99285e-33	0.0205842	0.936245	0	0	0	0
ARHGAP24	1.45574e-27	LGG	0.79008	0.0430033	LGG	0.568227	0.000652156	LGG	0.585502	5.77876e-27	0.0625217	0.00146194	1	0	0	0
ARHGAP25	1.6898e-20	GBM	0.729189	7.14855e-09	GBM	0.694403	2.53534e-13	GBM	0.67178	4.78046e-20	3.09736e-08	2.0464e-12	1	1	0	0
ARHGAP26	8.94152e-11	LGG	0.655427	0.634195	LGG	0.515219	0.0903604	GBM	0.549902	1.64319e-10	0.683665	0.129437	0	0	0	0
ARHGAP27	0.000916494	GBM	0.594423	3.14455e-05	GBM	0.64096	3.11271e-06	GBM	0.614186	0.00119085	7.75392e-05	1.00929e-05	1	1	0	0
ARHGAP28	5.83172e-11	LGG	0.701842	7.6828e-05	LGG	0.665112	0.000562129	LGG	0.625622	1.08127e-10	0.000179265	0.00127193	1	1	0	0
ARHGAP29	1.19322e-28	GBM	0.794633	5.17427e-07	GBM	0.665191	3.82497e-16	GBM	0.687046	5.01043e-28	1.67225e-06	4.38621e-15	1	1	0	0
ARHGAP30	0.000197601	GBM	0.611847	0.000361095	GBM	0.609772	6.06095e-09	GBM	0.630404	0.000266583	0.000760039	2.81916e-08	1	1	0	0
ARHGAP31	2.30676e-47	LGG	0.852476	5.8033e-13	LGG	0.736817	3.98739e-16	LGG	0.687654	2.74033e-46	5.03019e-12	4.55467e-15	1	1	0	0
ARHGAP31-AS1	3.075e-17	LGG	0.742574	0.000681725	LGG	0.601866	0.149913	LGG	0.528851	7.47493e-17	0.00136863	0.201915	1	0	0	0
ARHGAP32	3.25832e-62	LGG	0.926113	3.87491e-17	LGG	0.764922	1.80615e-07	LGG	0.637566	9.20306e-61	7.48656e-16	6.94435e-07	1	1	0	0
ARHGAP33	6.86042e-09	LGG	0.662402	0.104698	LGG	0.564906	0.000137542	LGG	0.586427	1.15825e-08	0.139239	0.00034698	1	0	0	0
ARHGAP35	5.94097e-34	LGG	0.850557	0.000271329	LGG	0.608665	0.00393522	LGG	0.568985	3.27532e-33	0.00058233	0.00758901	1	1	0	0
ARHGAP36	7.6186e-26	LGG	0.790895	7.97442e-11	LGG	0.726421	1.08702e-08	LGG	0.657891	2.7753e-25	4.70315e-10	4.91044e-08	1	1	0	0
ARHGAP39	2.42637e-13	LGG	0.696247	0.777194	LGG	0.515812	0.316538	LGG	0.510276	4.99158e-13	0.811596	0.387568	1	0	0	0
ARHGAP4	0.00110601	GBM	0.582656	4.94527e-08	GBM	0.680528	0.0042658	GBM	0.574098	0.00143036	1.88218e-07	0.00816257	1	1	0	0
ARHGAP40	0.945042	LGG	0.501029	0.930576	LGG	0.542968	0.119015	GBM	0.526666	0.94902	0.94314	0.164592	0	0	0	0
ARHGAP42	0.000276996	LGG	0.602539	0.115019	LGG	0.552376	0.572359	GBM	0.519369	0.00037075	0.151419	0.639093	0	0	0	0
ARHGAP44	2.01901e-46	LGG	0.863754	1.8424e-15	LGG	0.760297	1.27747e-13	LGG	0.70263	2.26872e-45	2.56015e-14	1.06258e-12	1	1	1	1
ARHGAP5	2.53875e-52	LGG	0.895491	1.02596e-15	LGG	0.76172	0.00639354	LGG	0.564225	4.01582e-51	1.49113e-14	0.0118092	1	1	0	0
ARHGAP5-AS1	1.44911e-17	LGG	0.766195	7.77771e-08	LGG	0.695351	1.10617e-10	LGG	0.661472	3.57527e-17	2.87918e-07	6.45095e-10	1	1	0	0
ARHGAP6	0.928888	GBM	0.5034	0.911056	LGG	0.524785	0.0502856	GBM	0.558904	0.933595	0.926758	0.0765649	0	0	0	0
ARHGAP8	0.00013091	LGG	0.592867	0.857646	GBM	0.50672	0.000443611	LGG	0.592383	0.000178383	0.881273	0.00102084	0	0	0	0
ARHGAP9	2.13766e-19	GBM	0.735499	2.7892e-11	GBM	0.717962	2.45898e-09	GBM	0.632272	5.73846e-19	1.78012e-10	1.20324e-08	1	1	0	0
ARHGDIA	1.68486e-12	GBM	0.694679	2.83801e-12	GBM	0.725551	0.63447	GBM	0.524826	3.34265e-12	2.15984e-11	0.6956	1	0	0	0
ARHGDIB	1.77272e-43	GBM	0.842215	2.14499e-17	GBM	0.771523	1.55767e-15	GBM	0.678488	1.69156e-42	4.36813e-16	1.63008e-14	1	1	0	0
ARHGDIG	1.69994e-26	LGG	0.802461	2.02526e-13	LGG	0.737608	1.62972e-14	LGG	0.683565	6.38761e-26	1.90961e-12	1.51251e-13	1	1	0	0
ARHGEF1	0.000113524	GBM	0.591349	3.96678e-11	GBM	0.719938	0.00581376	GBM	0.561043	0.00015528	2.46335e-10	0.0108105	1	1	0	0
ARHGEF10	0.68773	GBM	0.527473	0.644635	LGG	0.523164	0.00128656	GBM	0.576482	0.707035	0.692979	0.0027344	0	0	0	0
ARHGEF10L	3.21236e-28	LGG	0.768516	0.000634091	LGG	0.617124	0.000525238	LGG	0.576183	1.31909e-27	0.00128039	0.00119257	1	1	0	0
ARHGEF11	1.87491e-30	LGG	0.861596	0.002001	LGG	0.617875	0.0461344	LGG	0.55089	8.6282e-30	0.00373255	0.0708103	1	0	0	0
ARHGEF12	1.47027e-36	LGG	0.851335	2.51992e-12	LGG	0.71646	0.292031	LGG	0.543692	9.35643e-36	1.93942e-11	0.361737	1	0	0	0
ARHGEF15	1.23742e-09	GBM	0.671772	0.000126207	GBM	0.63001	0.0246325	GBM	0.577307	2.1645e-09	0.000285205	0.0402893	1	1	0	0
ARHGEF16	0.0429427	LGG	0.583459	0.0607648	LGG	0.565776	0.493972	LGG	0.533194	0.0499353	0.085476	0.565631	1	0	0	0
ARHGEF17	1.09732e-38	LGG	0.841111	1.33458e-05	LGG	0.642976	1.48579e-06	LGG	0.609082	7.91295e-38	3.48173e-05	5.0361e-06	1	1	0	0
ARHGEF18	4.98707e-17	LGG	0.758468	0.982362	GBM	0.50759	0.503698	GBM	0.511962	1.20285e-16	0.986147	0.574853	0	0	0	0
ARHGEF19	7.14054e-23	GBM	0.782252	5.13651e-06	GBM	0.667167	4.3096e-12	GBM	0.674327	2.24013e-22	1.4311e-05	3.02269e-11	1	1	0	0
ARHGEF2	7.29976e-10	LGG	0.682071	0.0295433	GBM	0.57554	0.581081	LGG	0.520311	1.29108e-09	0.0444517	0.647159	0	0	0	0
ARHGEF25	0.00369687	LGG	0.699747	2.16154e-06	LGG	0.674757	4.13023e-05	LGG	0.614023	0.00462449	6.39012e-06	0.000113064	1	1	0	0
ARHGEF26	2.20886e-09	LGG	0.676702	0.0010922	LGG	0.616452	0.00268163	LGG	0.57379	3.81685e-09	0.00212456	0.00533346	1	1	0	0
ARHGEF26-AS1	1.68592e-20	LGG	0.800003	9.41274e-25	LGG	0.816823	7.37935e-27	LGG	0.743008	4.77023e-20	1.41327e-22	3.63167e-25	1	1	1	1
ARHGEF28	7.33443e-13	GBM	0.668586	0.0165479	GBM	0.610878	3.91189e-05	GBM	0.641908	1.4809e-12	0.0262024	0.000107503	1	1	0	0
ARHGEF3	5.50721e-24	GBM	0.754604	0.0642386	GBM	0.565223	4.35785e-10	GBM	0.630187	1.81956e-23	0.0898915	2.35175e-09	1	0	0	0
ARHGEF33	3.55938e-18	LGG	0.724246	6.09048e-07	LGG	0.654241	0.0212043	LGG	0.565948	9.05516e-18	1.95056e-06	0.0351559	1	1	0	0
ARHGEF34P	0.0823432	GBM	0.542978	0.000411869	GBM	0.602004	0.0264129	GBM	0.558881	0.0936299	0.000858784	0.0429083	1	0	0	0
ARHGEF35	0.00577532	GBM	0.575048	0.000408765	GBM	0.618112	0.00256143	GBM	0.603983	0.00713648	0.000852712	0.00512083	1	1	0	0
ARHGEF37	1.84499e-29	LGG	0.799225	4.00084e-06	LGG	0.657918	0.0171668	LGG	0.564316	8.07777e-29	1.13423e-05	0.0290712	1	1	0	0
ARHGEF38	0.529288	GBM	0.511666	0.164346	LGG	0.523994	0.669578	GBM	0.512311	0.55297	0.208972	0.727753	0	0	0	0
ARHGEF39	9.96295e-34	GBM	0.82681	5.3261e-09	GBM	0.689224	3.04472e-10	GBM	0.656033	5.44339e-33	2.3526e-08	1.67839e-09	1	1	0	0
ARHGEF4	1.14545e-30	LGG	0.830737	4.75216e-14	LGG	0.747095	2.21305e-12	LGG	0.665769	5.33242e-30	5.04427e-13	1.60766e-11	1	1	0	0
ARHGEF40	2.18605e-05	LGG	0.619135	0.0408041	GBM	0.548304	0.0315437	GBM	0.539757	3.11088e-05	0.0595905	0.0503705	0	0	0	0
ARHGEF5	0.662308	GBM	0.501844	0.000296575	GBM	0.574789	4.81463e-06	GBM	0.620949	0.682529	0.000632301	1.51673e-05	1	0	0	0
ARHGEF6	1.37127e-07	LGG	0.651676	0.00130884	LGG	0.621907	0.921719	LGG	0.515026	2.18239e-07	0.00251613	0.938158	1	0	0	0
ARHGEF7	3.77816e-20	LGG	0.758317	0.000146009	LGG	0.65606	7.35418e-12	LGG	0.658227	1.05116e-19	0.000327118	5.01517e-11	1	1	0	0
ARHGEF7-AS2	2.59669e-15	LGG	0.719768	0.00557397	LGG	0.661001	4.12298e-16	LGG	0.694448	5.82234e-15	0.00963722	4.69755e-15	1	1	0	0
ARHGEF9	1.28704e-47	LGG	0.873539	2.46284e-11	LGG	0.722112	2.49418e-11	LGG	0.660937	1.55298e-46	1.5919e-10	1.5931e-10	1	1	0	0
ARID1A	8.5334e-11	LGG	0.675084	0.00980774	GBM	0.590679	0.47617	LGG	0.511926	1.57031e-10	0.0162138	0.548453	0	0	0	0
ARID1B	9.45768e-33	LGG	0.851874	2.45642e-05	LGG	0.644675	3.63427e-05	LGG	0.594287	4.89321e-32	6.15391e-05	0.000100387	1	1	0	0
ARID2	2.5808e-18	LGG	0.730543	0.000952555	LGG	0.598743	0.280217	LGG	0.530828	6.597e-18	0.00186914	0.349226	1	0	0	0
ARID3A	0.0535458	LGG	0.545512	5.05498e-06	GBM	0.647522	0.000312828	GBM	0.578685	0.0618412	1.40971e-05	0.000739673	0	0	0	0
ARID3B	0.000173721	GBM	0.613014	0.420098	GBM	0.521504	0.712049	GBM	0.506468	0.00023514	0.47855	0.764893	1	0	0	0
ARID3C	0.454218	LGG	0.519682	0.0105511	LGG	0.545932	0.146481	GBM	0.535211	0.478077	0.0173473	0.19773	0	0	0	0
ARID4A	2.13081e-63	LGG	0.91698	0.000246671	LGG	0.628745	1.27407e-05	LGG	0.61259	6.41899e-62	0.000531793	3.77723e-05	1	1	0	0
ARID4B	1.68867e-48	LGG	0.902215	0.0278371	LGG	0.550202	0.0670881	LGG	0.543329	2.15081e-47	0.0421207	0.0992236	1	0	0	0
ARID5A	4.07535e-34	GBM	0.807981	1.54939e-15	GBM	0.751878	1.35943e-19	GBM	0.703355	2.26305e-33	2.17344e-14	2.26575e-18	1	1	1	1
ARID5B	6.6048e-09	LGG	0.654699	0.0169859	LGG	0.573049	0.0294776	GBM	0.538896	1.11612e-08	0.0268264	0.0473692	0	1	0	0
ARIH1	4.3509e-15	LGG	0.729615	0.345686	GBM	0.541821	0.487806	GBM	0.505471	9.66483e-15	0.403433	0.559818	0	0	0	0
ARIH2	0.107374	GBM	0.535426	0.0276657	GBM	0.565895	0.0783759	GBM	0.533021	0.120746	0.0418729	0.114108	1	0	0	0
ARIH2OS	0.0011698	GBM	0.569697	0.00291505	LGG	0.607597	0.198944	LGG	0.504256	0.00150964	0.00527914	0.259093	0	0	0	0
ARL1	2.012e-15	GBM	0.729578	1.27258e-12	GBM	0.726777	3.8713e-05	GBM	0.580815	4.53497e-15	1.04536e-11	0.00010647	1	1	0	0
ARL10	1.87125e-16	LGG	0.719379	8.73929e-05	LGG	0.625978	0.000313163	LGG	0.579528	4.39622e-16	0.00020216	0.000740366	1	1	0	0
ARL11	9.60377e-25	GBM	0.764677	2.73759e-06	GBM	0.642422	9.27287e-13	GBM	0.674273	3.30028e-24	7.95765e-06	7.03227e-12	1	1	0	0
ARL13B	4.41385e-08	GBM	0.655991	0.000153378	GBM	0.636888	3.83152e-05	GBM	0.592746	7.16947e-08	0.000342544	0.000105441	1	1	0	0
ARL14EP	0.000225149	LGG	0.639269	1.03067e-08	LGG	0.680251	0.000631557	LGG	0.581504	0.000302961	4.35083e-08	0.00141798	1	1	0	0
ARL15	0.147589	LGG	0.532591	0.302317	LGG	0.512214	0.442387	GBM	0.504193	0.163953	0.358582	0.515677	0	0	0	0
ARL16	2.76333e-14	GBM	0.728875	0.113256	GBM	0.563997	0.0549156	LGG	0.526975	5.91356e-14	0.149363	0.0828881	0	0	0	0
ARL17A	1.02842e-10	GBM	0.676476	0.0117911	LGG	0.580362	0.00282141	LGG	0.559729	1.88444e-10	0.0192307	0.00559137	0	1	0	0
ARL17B	0.192044	LGG	0.554293	0.221646	GBM	0.528145	0.624751	GBM	0.518417	0.210988	0.272153	0.686815	0	0	0	0
ARL2	0.000169701	LGG	0.602978	0.0612001	LGG	0.561981	0.000965918	LGG	0.563935	0.000229805	0.0860132	0.00210003	1	0	0	0
ARL2BP	6.74591e-30	GBM	0.810552	0.783727	GBM	0.509724	0.0147025	GBM	0.546402	3.01406e-29	0.817311	0.0252603	1	0	0	0
ARL3	8.19269e-38	LGG	0.834086	1.25172e-22	LGG	0.796466	2.88256e-27	LGG	0.749989	5.6013e-37	8.56245e-21	1.5065e-25	1	1	1	1
ARL4A	1.48396e-19	GBM	0.731685	0.101173	GBM	0.564116	0.010834	GBM	0.56631	4.01722e-19	0.135068	0.0191163	1	0	0	0
ARL4C	3.0765e-51	GBM	0.862863	1.88308e-18	GBM	0.778164	7.472e-39	GBM	0.791917	4.63786e-50	4.79686e-17	2.45151e-36	1	1	1	1
ARL4D	2.60387e-10	GBM	0.66131	0.0020289	GBM	0.60317	0.00683453	GBM	0.562956	4.69712e-10	0.00377916	0.0125466	1	1	0	0
ARL5A	0.000295592	GBM	0.604897	0.84493	LGG	0.500356	0.190524	GBM	0.526549	0.00039501	0.870732	0.249429	0	0	0	0
ARL5B	2.56544e-22	LGG	0.784686	2.35534e-05	LGG	0.641474	1.93846e-05	LGG	0.606045	7.85698e-22	5.91992e-05	5.5789e-05	1	1	0	0
ARL5C	1.6641e-14	LGG	0.69917	2.00258e-07	LGG	0.673966	3.54761e-08	LGG	0.677346	3.59739e-14	6.91883e-07	1.49401e-07	1	1	0	0
ARL6	7.43377e-05	GBM	0.617329	0.258135	LGG	0.503479	0.835055	GBM	0.510738	0.000102723	0.311985	0.867519	0	0	0	0
ARL6IP1	1.83106e-07	GBM	0.65357	0.119704	LGG	0.553522	0.00892451	GBM	0.549766	2.89768e-07	0.157015	0.0160344	0	0	0	0
ARL6IP4	4.09867e-25	GBM	0.739212	1.76475e-05	GBM	0.634912	0.0479679	LGG	0.520792	1.43869e-24	4.52214e-05	0.073345	0	0	0	0
ARL6IP5	2.47043e-14	GBM	0.707813	0.0328744	LGG	0.555064	0.918736	LGG	0.500521	5.30218e-14	0.0490389	0.936173	0	0	0	0
ARL6IP6	0.000168683	GBM	0.579432	0.0515332	LGG	0.556052	0.960361	LGG	0.50131	0.000228514	0.0736599	0.969057	0	0	0	0
ARL8A	1.32267e-17	LGG	0.731672	0.527318	GBM	0.51091	0.00488689	LGG	0.565159	3.2711e-17	0.58277	0.00925118	0	0	0	0
ARL8B	0.652413	GBM	0.512795	3.53222e-06	LGG	0.638232	0.0481676	LGG	0.549911	0.672999	1.0092e-05	0.0736311	0	0	0	0
ARL9	6.7295e-58	GBM	0.863541	1.39088e-05	GBM	0.672958	4.09581e-16	GBM	0.716033	1.47573e-56	3.62067e-05	4.6726e-15	1	1	0	0
ARMC1	0.681972	GBM	0.525892	1.35308e-10	LGG	0.713139	0.00340872	LGG	0.567199	0.701483	7.68352e-10	0.00665773	0	0	0	0
ARMC10	2.5533e-47	GBM	0.920392	0.600199	GBM	0.533599	4.37209e-07	GBM	0.611502	3.02507e-46	0.651496	1.59581e-06	1	0	0	0
ARMC12	4.56485e-07	LGG	0.648477	0.00529175	LGG	0.622342	4.2016e-06	LGG	0.600216	7.07057e-07	0.00917179	1.33788e-05	1	1	0	0
ARMC2	6.61537e-08	GBM	0.658274	0.930095	GBM	0.508459	0.0475229	GBM	0.573091	1.06727e-07	0.942813	0.0727523	1	0	0	0
ARMC3	0.00683895	LGG	0.603242	0.839142	LGG	0.583307	0.978007	GBM	0.546235	0.00841662	0.865825	0.982945	0	0	0	0
ARMC4	2.75492e-07	LGG	0.648226	0.0226571	LGG	0.634912	0.472881	LGG	0.561225	4.31829e-07	0.0349422	0.545196	1	0	0	0
ARMC5	1.28222e-28	LGG	0.798422	0.0750603	LGG	0.564985	0.000147538	LGG	0.564588	5.37265e-28	0.103225	0.000370559	1	0	0	0
ARMC6	0.0368447	GBM	0.552198	0.0277096	GBM	0.55538	0.365932	LGG	0.503105	0.0430656	0.0419349	0.4396	0	0	0	0
ARMC7	1.67498e-18	GBM	0.744066	2.56775e-11	GBM	0.711005	0.137726	GBM	0.543592	4.32096e-18	1.65368e-10	0.187268	1	0	0	0
ARMC8	3.33981e-09	LGG	0.670668	0.0347277	LGG	0.579769	0.0015876	LGG	0.597686	5.71739e-09	0.0515475	0.0033095	1	0	0	0
ARMC9	1.03514e-28	GBM	0.780584	7.67089e-08	GBM	0.676299	1.81629e-06	GBM	0.626787	4.36324e-28	2.8432e-07	6.07613e-06	1	1	0	0
ARMCX1	1.84701e-15	LGG	0.75419	2.10685e-06	LGG	0.651198	0.00103942	LGG	0.58979	4.17054e-15	6.24146e-06	0.00224593	1	1	0	0
ARMCX2	6.79509e-09	GBM	0.629209	0.000144439	GBM	0.637521	1.81643e-11	GBM	0.641573	1.14733e-08	0.000323887	1.17968e-10	1	1	0	0
ARMCX3	1.39163e-25	LGG	0.795424	0.00552265	LGG	0.614792	0.0862809	GBM	0.516857	5.00539e-25	0.00955329	0.124158	0	0	0	0
ARMCX4	2.54856e-56	LGG	0.918247	1.68336e-13	LGG	0.742865	3.47343e-19	LGG	0.710852	5.0951e-55	1.60604e-12	5.51422e-18	1	1	1	1
ARMCX5	0.243397	GBM	0.526645	0.0846004	LGG	0.564195	0.620999	GBM	0.50839	0.264298	0.114926	0.683327	0	0	0	0
ARMCX6	9.50587e-26	GBM	0.794621	3.06769e-10	GBM	0.694403	2.7985e-12	GBM	0.661082	3.44927e-25	1.64898e-09	2.00085e-11	1	1	0	0
ARMS2	0.357651	LGG	0.520479	0.00221958	LGG	0.590165	0.0181751	LGG	0.558201	0.381257	0.00410998	0.0306063	1	0	0	0
ARNT	0.259768	LGG	0.549388	0.0403816	GBM	0.564076	0.665071	GBM	0.50403	0.281278	0.0590394	0.723468	0	0	0	0
ARNT2	5.10478e-43	LGG	0.893735	3.6692e-22	LGG	0.812871	1.81913e-17	LGG	0.696338	4.78316e-42	2.14545e-20	2.38738e-16	1	1	0	0
ARNTL	7.79405e-25	GBM	0.794822	0.18145	GBM	0.576567	5.74345e-07	GBM	0.614603	2.68622e-24	0.228028	2.05655e-06	1	0	0	0
ARNTL2	2.18542e-54	GBM	0.866727	1.6658e-06	GBM	0.654637	2.34793e-12	GBM	0.687499	3.93265e-53	5.01069e-06	1.69789e-11	1	1	0	0
ARPC1A	1.32457e-43	GBM	0.88592	1.54298e-12	GBM	0.733655	0.659821	GBM	0.532133	1.27562e-42	1.24428e-11	0.71868	1	0	0	0
ARPC1B	1.73806e-35	GBM	0.815395	1.97162e-14	GBM	0.744486	2.63772e-17	GBM	0.69021	1.04077e-34	2.23631e-13	3.42362e-16	1	1	0	0
ARPC2	2.76131e-48	GBM	0.913919	1.46586e-11	GBM	0.73488	0.00958809	GBM	0.591585	3.46449e-47	9.93139e-11	0.0171104	1	1	0	0
ARPC3	3.75978e-31	GBM	0.852865	3.4653e-12	GBM	0.72318	0.0231326	GBM	0.59251	1.78802e-30	2.59049e-11	0.0380503	1	1	0	0
ARPC4	2.83906e-25	GBM	0.804531	2.58558e-11	GBM	0.741877	0.0142351	GBM	0.576908	1.00537e-24	1.66456e-10	0.0245214	1	1	0	0
[truncated: 16,723 more rows]

## Sheet: genes_mes_vs_pron_GBM
	p_value_TCGA	direction_TCGA	AUC_TCGA	p_value_CGGA_325	direction_CGGA_325	AUC_CGGA_325	p_value_CGGA_693	direction_CGGA_693	AUC_CGGA_693	q_TCGA	q_CGGA_325	q_CGGA_693	direction	q	auc	all
[truncated: 17,717 more rows]

[truncated: 5 more sheets: genes_class_vs_pron_GBM, genes_mes_vs_class_GBM, genecentr.path.mes_vs_pron_GBM, genecentr.path.clas_vs_pron_GBM, genecentr.path.mes_vs_class_GBM]
